# Supplementary material for: Retroactive merger review of Duke and Progress Energy in North and South Carolina
Source: Research Square preprint supplement (doi:10.21203/rs.3.rs-4676204/v1), 2024-07-24
Supplement: Supplementary file 1 [file 2dbbfd16abd6894310fda065.xlsx]

## Sheet: Index
	Index
	Sheet #	Sheet Name	Description
	1	Main	Consolidation of all data that is put together from multiple sources to create a panel data
	2	Imputed main data	Transformation of the "Main" sheet by using Python to create compilation of values
	3	All Raw Statewise Data	State-wise electricity utilization and consumption data
	4	Indust and Supplier Price	Distributor-wise electricity utilization and consumption data
	5	Cost of Product	Cost of producing electricity
	6	Cost Info Matrix	Matrix to check data availability for resource production

## Sheet: Main
Year	STATE	State_NA	State_Code	Real_GSP_2017_$M	State_UR	Population	Any_merger?	IOU_Merger	GSP_Per_Capita	With data	Cost_Primary_MBTU	Cost_Coal_MBTU	Cost_FuelOil_MBTU	Cost_NaturalGas_MBTU	IOU_Res	Mark_Res	Cust_Res	KWH_res	CPKWH_res	Bill_res	IOU_Com	Mark_Com	Cust_com	KWH_com	CPKWH_com	Bill_com	IOU_Indus	Mark_Indus	Cust_indus	KWH_indus	CPKWH_indus	Bill_indus
2006	AK	Alaska	2006_AK	47546.2	6.6	675302	1	0	70407.3	0					19	71	261502	675.665	14.8274	100.183	20	71	45690	5141.92	11.9272	613.289	5	23	1383	74887.1	11.5408	8642.56
2007	AK	Alaska	2007_AK	50126.7	6.3	680300	1	0	73683.2	0					19	71	265449	664	15.1799	100.76	20	72	46047	5119	12.1869	623.81	5	22	1349	85481	12.6325	10798.4
2008	AK	Alaska	2008_AK	49926.6	6.7	687455	1	0	72625.3	0					17	69	268638	661	16.5483	109.31	18	71	47032	5052	13.6354	688.85	4	22	1350	82985	14.1731	11761.5
2009	AK	Alaska	2009_AK	54951.9	7.7	698895	1	0	78626.8	0					16	69	269669	654	17.14	112.13	18	71	47337	5002	14.46	723.13	4	23	1367	79946	13.15	10510.5
2006	CA	California	2006_CA	2.12044e+06	4.9	36021202	0	0	58866.3	1			13.84		6	44	12689438	589.964	14.3323	84.5555	6	45	1751882	5767.85	12.8952	743.776	6	40	79036	53763.4	10.0901	5424.76
2010	AK	Alaska	2010_AK	54045.5	7.9	713982	1	0	75695.9	0					17	70	271956	641	16.26	104.29	18	71	47844	4929	13.95	687.36	3	19	1350	81734	14.14	11561.1
2006	CT	Connecticut	2006_CT	269479	4.3	3517460	0	0	76611.7	1				7.32	2	9	1437836	751.33	16.8561	126.645	2	10	152984	7414.19	14.0268	1039.97	2	8	5361	76571.2	11.7078	8964.79
2006	DC	District of Columbia	2006_DC	108848	5.8	570681	0	0	190734	0					1	1	209316	725.422	9.87833	71.6596	1	1	26756	28124	11.1653	3140.14	0	1	1	1.99868e+07	17.4306	3.48383e+06
2006	DE	Delaware	2006_DE	68411.8	3.6	859268	0	0	79616.4	2			13.88	7.59	1	11	381642	929.894	11.8489	110.182	1	11	47098	7424.25	10.2129	758.229	1	7	610	423501	7.66516	32462
2006	FL	Florida	2006_FL	909299	3.2	18166990	0	0	50052.3	0					5	53	8291743	1176.4	11.3313	133.302	5	53	1090153	6979.14	9.90987	691.624	5	34	30889	53330.2	7.70682	4110.06
2011	AK	Alaska	2011_AK	54045.5	7.6	722349	1	0	74819.1	3	6.17	1.73		4.97	15	69	273855	649	17.62	114.42	17	71	48503	4904	15.1	740.4	2	18	1250	88714	15.71	13935.6
2012	AK	Alaska	2012_AK	57087.4	7.1	730810	1	0	78115.2	4	6.07	1.81	27.04	4.27	3	23	275405	653.642	17.8828	116.89	4	23	48790	4910.57	14.9268	732.992	1	11	1263	91130.7	16.8208	15328.9
2006	IA	Iowa	2006_IA	155704	3.7	2982644	0	0	52203.5	2		1.03	15.32		3	183	1313858	846.382	9.63164	81.5205	3	176	206821	4698.23	7.29225	342.607	3	104	5790	263837	4.92146	12984.6
2006	ID	Idaho	2006_ID	60738.6	3.5	1468669	0	0	41356.2	2	5.68		15.99		3	30	628199	1068.86	6.2084	66.359	3	27	92585	5232.33	5.15613	269.785	3	23	25677	28855.4	3.60567	1040.43
2006	IL	Illinois	2006_IL	759826	4.5	12643955	0	0	60094	2	0.96	1.25			8	76	5020608	769.852	8.42407	64.8529	8	75	568400	7423.02	7.94995	590.126	8	53	6513	574702	4.68853	26945.1
2013	AK	Alaska	2013_AK	54627.6	7	737626	1	0	74058.7	0					3	23	277275	632.334	18.1172	114.562	4	23	49182	4785.29	15.5799	745.543	1	11	1314	84985.2	15.8322	13455
2006	KS	Kansas	2006_KS	136136	4.4	2762931	0	0	49272.2	3	1.29	1.19	15.5		6	154	1203783	934.739	8.2521	77.1356	6	152	217500	5665.27	6.96308	394.477	5	82	17680	54026.6	5.20059	2809.7
2014	AK	Alaska	2014_AK	53303.3	6.9	737075	1	0	72317.3	0					3	22	281438	605.111	19.1361	115.795	4	23	51017	4510.78	17.0949	771.112	1	11	1287	88039.4	15.6646	13791
2015	AK	Alaska	2015_AK	53681.1	6.5	738430	1	0	72696.3	1	5.82				2	21	282282	603.47	19.8255	119.641	3	22	50642	4547.43	17.4359	792.884	1	11	1299	86703.2	14.5253	12593.9
2006	MA	Massachusetts	2006_MA	426926	4.9	6410084	0	1	66602.3	1			0.41		7	47	2610734	626.402	16.5984	103.973	7	48	374294	5841.43	15.5418	907.861	7	43	14072	56865	13.0397	7415.03
2006	MD	Maryland	2006_MD	329874	3.9	5627367	0	0	58619.6	1			2.27		4	12	2141929	1046.77	9.71399	101.684	4	12	236610	10470.5	10.5638	1106.08	3	8	8363	60355.4	8.13887	4912.25
2006	ME	Maine	2006_ME	59986	4.6	1323619	0	0	45319.7	2	6.3			7.06	1	7	685425	528.996	13.8014	73.0088	1	7	86406	3986.9	12.4248	495.364	0	4	2825	112089	8.83121	9898.82
2006	MI	Michigan	2006_MI	483764	7	10036081	0	0	48202.4	1			1.64		9	60	4299273	671.084	9.76814	65.5525	9	59	514049	6370.83	8.51044	542.185	9	47	13317	213342	6.04597	12898.6
2006	MN	Minnesota	2006_MN	302273	4	5163555	0	0	58539.6	3	2.47		1.21	8.65	5	176	2240891	814.758	8.69542	70.8466	5	175	260186	7102.36	7.01877	498.498	4	117	8503	222120	5.28718	11743.9
2006	MO	Missouri	2006_MO	286558	4.8	5842704	0	0	49045.5	3	1.24		1.11	6.76	4	134	2641569	1068.81	7.43655	79.4829	4	132	359108	6915.39	6.07659	420.22	4	90	10528	144976	4.57691	6635.42
2016	AK	Alaska	2016_AK	53463.9	6.9	742575	1	0	71998	1		3.08			2	22	283260	590.268	20.3034	119.844	3	22	52804	4310.75	17.5562	756.803	1	11	1343	85958.7	15.2173	13080.6
2017	AK	Alaska	2017_AK	53550.9	7	740983	1	0	72270.1	0					2	20	285697	600.971	21.2702	127.828	3	21	53472	4215.43	18.8892	796.261	1	10	1374	86157.2	16.3398	14077.9
2006	NC	North Carolina	2006_NC	470664	4.7	8917270	0	0	52781.2	2			13.99	7.64	3	107	4011329	1097.96	9.11648	100.095	3	106	621995	5973.35	7.16679	428.097	3	66	10867	224402	5.23082	11738.1
2018	AK	Alaska	2018_AK	52479.6	6.6	736624	1	0	71243.4	1	7.17				2	21	287526	572	21.94	125.57	3	21	53957	4086.68	18.5789	759.26	1	10	1387	81201	17.1	13888.3
2019	AK	Alaska	2019_AK	52325.3		733603	1	0	71326.5	4	7.11	3.51	15.74	6.97	12	55	289290	555	22.92	127.29	12	54	55080	3992	19.8	790.35	2	15	1126	92639.9	16.9428	15695.8
2020	AK	Alaska	2020_AK	50344.6			1	0		3		3.46	11.67	6.42	1	1	315208	552.293	22.5714	124.66	3	12	61993	3393.01	19.5753	664.192	1	6	1129	96281	15.8849	15294.2
2006	NJ	New Jersey	2006_NJ	555211	4.7	8661679	0	0	64099.7	1			14.58		4	14	3372447	707.24	12.8441	90.8388	4	14	461461	7121.85	11.6201	827.564	4	8	13929	67787.8	10.4151	7060.15
2006	AL	Alabama	2006_AL	199924	4	4628981	1	0	43189.6	1	2.26				1	61	2065096	1302.49	8.75138	113.985	1	61	359846	5122.55	8.17609	418.824	1	56	8878	340549	4.90081	16689.6
2007	AL	Alabama	2007_AL	202026	4	4672840	1	0	43234	1	2.29				1	61	2093093	1305	9.32419	121.7	1	61	365740	5211	8.70312	453.56	1	56	9828	306713	5.27045	16165.1
2006	NY	New York	2006_NY	1.33957e+06	4.5	19104631	0	1	70117.5	2	4.24			0.49	8	60	6829269	590.922	16.8939	99.8296	8	60	1004967	6304.4	15.5112	977.889	8	50	9115	136921	9.3922	12859.9
2006	OH	Ohio	2006_OH	582638	5.4	11481213	0	0	50747	2			11.72	0.39	7	116	4892005	875.156	9.34451	81.7791	7	116	605189	6353.48	8.43728	536.061	8	99	21537	216176	5.60759	12122.2
2006	OK	Oklahoma	2006_OK	149367	4	3594090	0	0	41559.1	2			13.31	1.09	4	96	1616987	1117.84	8.54879	95.5618	4	96	249947	6066.84	7.34298	445.487	4	65	17810	70270.7	5.45517	3833.38
2006	OR	Oregon	2006_OR	177222	5.3	3670883	0	0	48277.9	3	4.88		14.06	1.3	3	40	1577005	1002.83	7.47595	74.9709	3	40	228472	5866.01	6.76698	396.952	3	36	21780	49705.3	4.8518	2411.6
2006	PA	Pennsylvania	2006_PA	626590	4.6	12510809	0	0	50083.9	1				1.71	11	59	5190697	831.457	10.3475	86.0352	11	57	665763	5710.69	8.94487	510.813	10	44	28272	141248	6.6338	9370.12
2008	AL	Alabama	2008_AL	200967	5.7	4718206	1	0	42594	1	2.93				1	61	2110859	1271	10.4012	132.16	1	61	371024	5061	9.86589	499.31	1	57	9260	314881	6.11159	19244.3
2007	NC	North Carolina	2007_NC	477921	4.7	9118037	0	0	52414.9	2			14.91	7.94	3	107	4090510	1143	9.39655	107.38	3	106	639991	6095	7.42892	452.77	3	68	10748	224681	5.46502	12278.8
2009	AL	Alabama	2009_AL	194192	11	4757938	1	0	40814.3	0					1	61	2128009	1233	10.66	131.42	1	61	353885	5161	10.05	518.89	1	57	9252	265138	5.96	15807.4
2010	AL	Alabama	2010_AL	201373	10.5	4785514	1	0	42079.7	0					1	61	2138911	1384	10.67	147.69	1	61	356296	5376	10.18	547.09	1	56	6915	389848	6.01	23440
2011	AL	Alabama	2011_AL	201373	9.6	4799642	1	0	41955.8	1			22.05		1	61	2142625	1284	11.09	142.41	1	61	356074	5209	10.47	545.62	1	56	6491	433105	6.25	27052.9
2006	UT	Utah	2006_UT	127539	3	2525507	0	0	50500.5	2			15.25	6.19	1	50	886169	774.123	7.59492	58.7941	1	49	108003	7522.01	6.14592	462.297	1	28	9164	75982.7	4.21195	3200.36
2006	VA	Virginia	2006_VA	451263	3.1	7673725	0	0	58806.3	2	7.93		12.87		5	34	3095982	1154.88	8.48787	98.0251	5	34	392080	9490.8	6.21437	589.794	5	30	5178	305750	4.69084	14342.2
2012	AL	Alabama	2012_AL	203676	8	4816632	1	0	42285.9	0					1	52	2150977	1186.76	11.3977	135.263	1	51	357395	5082.89	10.6341	540.519	1	47	7168	392382	6.22479	24424.9
2006	WA	Washington	2006_WA	372145	5	6370753	0	0	58414.6	2	1.68			5.66	3	60	2704101	1061.31	6.82342	72.4174	3	59	337999	7046.43	6.63414	467.47	3	43	25829	71022.9	4.43525	3150.04
2013	AL	Alabama	2013_AL	206963	7.2	4831586	1	0	42835.4	0					1	52	2158898	1211.21	11.2579	136.358	1	51	358712	5251.02	10.5144	552.112	1	45	7029	401553	5.94766	23883
2006	WV	West Virginia	2006_WV	68900	4.9	1827912	0	0	37693.3	2	1.66		12.06		11	16	853995	1074.79	6.35193	68.2701	11	16	132024	4656.65	5.59318	260.455	4	5	11768	98543.3	3.70933	3655.29
2006	WY	Wyoming	2006_WY	36655.6	3.2	522667	0	0	70131.8	3	1.01		16.28	6.83	5	34	243240	845.508	7.7464	65.4964	5	31	55566	6173.77	6.27797	387.587	4	21	8060	86456.3	4.0417	3494.3
2014	AL	Alabama	2014_AL	206070	6.8	4843737	1	0	42543.6	0					1	51	2169790	1264.7	11.4849	145.249	1	51	360901	5294.46	10.7879	571.16	1	45	7236	398872	6.15244	24540.3
2015	AL	Alabama	2015_AL	208950	6.1	4854803	1	0	43039.9	2		2.44	12.66		1	51	2182616	1218.28	11.6954	142.483	1	52	362871	5382.5	10.8314	583	1	45	7254	384836	6.03393	23220.7
2016	AL	Alabama	2016_AL	212863	5.8	4866824	1	0	43737.5	2	1.98			2.95	1	52	2200574	1213.91	11.9898	145.545	1	52	367009	5366.46	11.1144	596.448	1	45	7266	373143	6.04339	22550.5
2017	AL	Alabama	2017_AL	216616	4.4	4877989	1	0	44406.7	2	2.02		13.52		1	51	2213592	1136.2	12.5466	142.555	1	52	369984	5122.7	11.5966	594.058	1	44	8047	345024	6.15981	21252.8
2007	CA	California	2007_CA	2.16894e+06	5.4	36250311	0	1	59832.3	1			16.19		6	44	12819149	580	14.4236	83.6	6	45	1785796	5772	12.8178	739.84	6	40	78620	53568	9.98447	5348.49
2018	AL	Alabama	2018_AL	220809	3.9	4891628	1	0	45140.1	0					1	52	2229472	1236	12.18	150.54	1	52	371097	5273.35	11.2389	592.667	1	44	7343	382701	6.01	23014.4
2007	CT	Connecticut	2007_CT	278485	4.5	3527270	0	0	78952.1	1				7.72	2	9	1459141	764	19.1114	145.95	2	10	158922	7932	15.3884	1220.55	2	8	5986	75640	12.9205	9773.12
2007	DC	District of Columbia	2007_DC	112288	5.5	574404	0	0	195485	0					1	1	212389	773	11.1825	86.42	1	1	27493	28852	12.0118	3465.66	0	0	13	1901840	9.32195	177288
2007	DE	Delaware	2007_DE	68132.4	3.4	871749	0	0	78156	2			15.22	7.75	1	11	387923	960	13.1647	126.4	1	11	48590	7410	11.2075	830.5	1	7	616	416458	8.92506	37169.1
2007	FL	Florida	2007_FL	922288	4	18367842	0	0	50212.1	0					5	53	8445561	1163	11.223	130.47	5	53	1117907	7002	9.74554	682.38	5	34	28476	56308	7.75636	4367.42
2019	AL	Alabama	2019_AL	224945		4907965	1	0	45832.6	0					1	61	2249425	1201	12.53	150.45	1	62	369798	5200	11.52	598.89	1	54	7245	375006	5.95022	22313.6
2020	AL	Alabama	2020_AL	222081			1	0		1	1.64				1	1	2280741	1144.77	12.575	143.954	1	46	371888	4774.68	11.5469	551.33	1	41	7240	354015	5.87358	20793.3
2007	IA	Iowa	2007_IA	162838	3.7	2999212	0	0	54293.6	2		1.06	17.45		3	183	1323176	886	9.44609	83.65	3	177	209108	4816	7.10586	342.21	3	105	5941	268261	4.73768	12709.3
2007	ID	Idaho	2007_ID	61812.1	3.1	1505105	0	1	41068.3	2	5.98		17.72		3	30	644645	1078	6.35933	68.56	3	27	96345	5202	5.14041	267.42	3	24	25722	30458	3.87299	1179.62
2007	IL	Illinois	2007_IL	769572	5	12695866	0	0	60615.9	2	1.09	1.33			8	76	5065123	790	10.1242	80.01	8	75	579121	7489	8.57274	642	8	55	5889	642869	6.60649	42471.1
2006	AR	Arkansas	2006_AR	114890	5.2	2821761	1	0	40715.9	2		1.47	14.17		4	36	1283520	1107.96	8.85263	98.0837	4	36	171018	5642.94	6.95838	392.657	4	32	31422	47710.8	5.24286	2501.41
2007	KS	Kansas	2007_KS	143587	4.2	2783785	0	0	51579.6	2		1.23	16.61		5	152	1250241	920	8.19304	75.4	5	150	230660	5591	6.82596	381.61	5	81	18303	49561	5.12836	2541.67
2007	AR	Arkansas	2007_AR	114027	5.3	2848650	1	0	40028.3	2		1.6	14.79		4	36	1298492	1118	8.73125	97.58	4	36	173714	5661	6.91494	391.47	4	33	31471	47237	5.24943	2479.66
2008	AR	Arkansas	2008_AR	113628	5.5	2874554	1	0	39528.9	2		1.72	16.41		4	36	1308810	1107	9.27275	102.69	4	36	176049	5540	7.60786	421.46	4	33	31694	44799	5.8903	2638.82
2007	MA	Massachusetts	2007_MA	440374	4.6	6431559	0	1	68470.8	1			0.57		5	45	2642144	635	16.2318	103.09	5	46	378830	5972	15.2016	907.83	5	41	13950	56452	13.0255	7353.11
2007	MD	Maryland	2007_MD	331764	3.5	5653408	0	0	58683.8	1			2.12		4	12	2163625	1086	11.8928	129.15	4	12	239024	10700	11.5774	1238.8	3	8	8586	58044	9.41454	5464.54
2007	ME	Maine	2007_ME	60032.6	4.7	1327040	0	0	45238	2	6.94			7.67	1	7	694235	530	16.5232	87.53	1	7	87565	3993	12.9428	516.74	0	4	2820	96093	14.105	13554
2007	MI	Michigan	2007_MI	482935	7	10001284	0	0	48287.3	1			1.69		9	60	4298455	686	10.2126	70.02	9	59	518058	6442	8.77447	565.24	9	45	13227	213445	6.47041	13810.8
2007	MN	Minnesota	2007_MN	304208	4.6	5207203	0	0	58420.6	3	2.68		1.5	7.18	5	176	2267167	832	9.17836	76.4	5	175	266164	7052	7.47761	527.3	4	118	8726	220046	5.68896	12518.3
2007	MO	Missouri	2007_MO	288321	5.1	5887612	0	0	48970.8	3	1.52		1.33	7.17	4	133	2666181	1121	7.68958	86.22	4	133	363192	7142	6.33809	452.65	4	91	10634	145091	4.76308	6910.77
2009	AR	Arkansas	2009_AR	109833	7.8	2896843	1	0	37914.8	2		1.67	16.01		4	36	1315041	1076	9.14	98.38	4	36	177635	5384	7.56	406.96	4	33	31757	38601	5.76	2223.73
2010	AR	Arkansas	2010_AR	115242	8.2	2921998	1	0	39439.4	2		1.71	16.14		4	36	1322833	1211	8.86	107.28	4	36	178962	5675	7.31	414.72	4	33	32408	43134	5.44	2348.24
2008	NC	North Carolina	2008_NC	492689	6.1	9309449	0	0	52923.5	2			19.76	11	3	106	4146430	1120	9.51654	106.61	3	105	649617	5970	7.55181	450.83	3	69	10968	211013	5.53523	11680
2011	AR	Arkansas	2011_AR	115242	8.3	2941038	1	0	39184.1	0					4	36	1328286	1179	9.02	106.27	4	36	180291	5614	7.5	421.11	4	33	32761	43227	5.63	2434.4
2012	AR	Arkansas	2012_AR	116616	7.6	2952876	1	0	39492.4	0					4	31	1332154	1120.32	9.29515	104.136	4	30	181823	5546.62	7.71413	427.874	4	28	33926	41383.6	5.76496	2385.75
2013	AR	Arkansas	2013_AR	119843	7.2	2960459	1	0	40481.2	4	2.43	2.4	22.06	4.83	4	31	1339680	1133.31	9.58594	108.638	4	30	182941	5419.76	8.0461	436.079	4	28	34699	39783.5	6.0358	2401.25
2007	NJ	New Jersey	2007_NJ	560824	4.3	8677885	0	0	64626.8	1			16.31		4	14	3394474	730	14.1397	103.28	4	14	465987	7310	12.991	949.63	4	7	13579	67588	10.0813	6813.75
2014	AR	Arkansas	2014_AR	121409	6	2968759	1	0	40895.7	0					4	30	1345009	1142.56	9.50747	108.629	4	30	185842	5375.55	8.04798	432.623	4	28	35685	38883.6	6.02033	2340.92
2015	AR	Arkansas	2015_AR	121532	5	2979732	1	0	40786.4	0					4	30	1356658	1122.45	9.81921	110.216	4	30	187706	5395.51	8.32041	448.929	4	28	35868	37261.8	6.22741	2320.45
2007	NY	New York	2007_NY	1.3538e+06	4.6	19132335	0	1	70759.7	2	4.55			0.46	8	60	6933304	604	17.0988	103.25	8	60	1016069	6096	15.9153	970.18	7	48	12834	131244	8.71233	11434.4
2007	OH	Ohio	2007_OH	585403	5.6	11500468	0	0	50902.5	2			16.16	0.41	7	116	4894635	926	9.57035	88.6	7	116	609250	6583	8.67458	571.05	8	99	21346	231187	5.76341	13324.2
2007	OK	Oklahoma	2007_OK	152880	4.1	3634349	0	0	42065.2	2			16.39	1.17	3	95	1617944	1100	8.58456	94.45	3	95	258573	6006	7.33324	440.4	3	63	17579	72047	5.414	3900.63
2007	OR	Oregon	2007_OR	180724	5.2	3722417	0	1	48550.3	3	5.01		16.19	1.38	3	40	1599912	1009	8.18528	82.6	3	41	230792	5845	7.19988	420.8	3	36	22278	49067	5.06041	2483.01
2007	PA	Pennsylvania	2007_PA	649638	4.4	12563937	0	0	51706.6	1				1.74	11	59	5207370	874	10.9494	95.65	11	57	667419	5935	9.20396	546.23	10	44	27857	145323	6.8703	9984.12
2016	AR	Arkansas	2016_AR	123035	4	2991815	1	0	41123.8	0					4	31	1368867	1082.66	9.92413	107.445	4	30	190181	5335.98	8.23011	439.157	4	28	36428	37119.2	6.07715	2255.79
2009	NC	North Carolina	2009_NC	473610	10.6	9449566	0	0	50119.8	2			12.28	7.63	3	106	4175829	1124	9.99	112.3	3	105	650652	5922	7.98	472.59	3	71	11375	183880	5.99	11014.7
2017	AR	Arkansas	2017_AR	123883	3.7	3003855	1	0	41241.2	0					4	30	1380157	1028.07	10.276	105.645	4	30	191879	5173.62	8.51158	440.357	4	29	35595	40142	6.07189	2437.38
2018	AR	Arkansas	2018_AR	126371	3.7	3012161	1	0	41953.7	3		1.98	16.48	3.3	4	31	1388358	1156	9.81	113.36	4	30	196482	5207.55	7.74923	403.545	4	29	36596	41136	5.64	2319.98
2019	AR	Arkansas	2019_AR	127216		3020985	1	0	42110.8	0					4	36	1396870	1118	9.8	109.46	4	36	198861	5007	8.78	439.86	4	33	34864	41617.9	6.13221	2552.1
2007	UT	Utah	2007_UT	133800	2.6	2597746	0	1	51506.1	2			17.53	5.6	1	50	909388	802	8.15414	65.39	1	51	111576	7648	6.53598	499.9	1	30	9461	77153	4.52471	3490.95
2007	VA	Virginia	2007_VA	457569	3	7751000	0	0	59033.5	2	7.95		13.58		5	34	3139055	1207	8.74198	105.55	5	34	400520	9773	6.37819	623.34	5	29	5175	304748	5.06508	15435.8
2020	AR	Arkansas	2020_AR	128061			1	0		0					1	1	1413490	1060.04	10.4082	110.331	4	28	197869	4679.2	8.61102	402.927	4	27	35978	38820.4	5.89155	2287.13
2007	WA	Washington	2007_WA	394222	4.7	6461587	0	1	61010.1	2	1.85			6.01	3	60	2748270	1073	7.26125	77.92	3	59	345048	7149	6.55264	468.42	3	43	26114	66224	4.5698	3026.32
2006	AZ	Arizona	2006_AZ	296424	4.2	6029141	1	0	49165.3	3	2.58	1.42	16.31		5	33	2442903	1104.13	9.39754	103.761	5	34	280070	8517.49	8.01675	682.826	5	33	7397	138112	5.68955	7857.96
2007	WV	West Virginia	2007_WV	69374.1	4.6	1834052	0	0	37825.6	2	1.81		15.64		11	16	860068	1138	6.73147	76.63	11	16	134682	4807	5.84648	281.04	4	6	11858	103032	3.95432	4074.23
2007	WY	Wyoming	2007_WY	39504.8	2.8	534876	0	1	73857.9	3	1.06		17.72	6.82	5	34	247939	871	7.75157	67.53	5	31	57138	6145	6.24835	383.98	4	22	8217	88535	4.10446	3633.88
2007	AZ	Arizona	2007_AZ	306612	3.9	6167681	1	0	49712.6	3	2.78	1.57	16.71		5	34	2513923	1142	9.66293	110.31	5	35	291457	8713	8.26692	720.34	5	33	7418	137967	6.04649	8342.17
2008	AZ	Arizona	2008_AZ	302278	6.2	6280362	1	0	48130.6	3	3.26	1.73	20.5		5	34	2528405	1095	10.2668	112.47	5	35	298347	8425	8.92894	752.25	5	34	7314	146629	6.57383	9639.16
2009	AZ	Arizona	2009_AZ	277412	9.9	6343154	1	0	43734.1	3	2.04	1.81	14.73		5	35	2544383	1076	10.73	115.42	5	36	299528	8176	9.35	764.52	5	35	7204	129562	6.65	8622.26
2010	AZ	Arizona	2010_AZ	290411	10.4	6407342	1	0	45324.8	3	2.13	1.79	18.23		5	35	2554213	1059	10.97	116.09	5	36	300507	8026	9.47	760.29	5	37	7143	133487	6.63	8853.77
2008	CA	California	2008_CA	2.19233e+06	7.3	36604337	0	1	59892.7	1			22.58		6	44	12941717	587	13.8053	81.1	6	47	1807261	5765	12.5391	722.88	6	40	77326	54996	10.0438	5523.65
2011	AZ	Arizona	2011_AZ	290411	9.5	6473416	1	0	44862.1	1		1.98			5	35	2575586	1070	11.08	118.62	5	36	305340	8054	9.5	764.94	5	37	7212	142728	6.55	9355.42
2008	CT	Connecticut	2008_CT	277793	5.7	3545579	0	0	78349.2	1				10.34	2	9	1452080	731	19.5459	142.79	2	10	155328	7331	17.1198	1255.11	2	9	5233	69611	14.9344	10395.9
2008	DC	District of Columbia	2008_DC	116214	6.5	580236	0	0	200287	0					1	1	215355	734	12.7857	93.83	1	1	30896	25058	13.2274	3314.57	0	0	13	1957346	10.4886	205297
2008	DE	Delaware	2008_DE	65771.3	4.9	883874	0	0	74412.5	3		3.56	20.26	10.58	1	11	391810	942	13.9335	131.23	1	11	48966	7384	12.0652	890.91	1	7	619	401416	10.4541	41964.3
2008	FL	Florida	2008_FL	891767	6.3	18527305	0	0	48132.6	0					5	53	8478405	1120	11.6544	130.52	5	53	1129098	6879	10.135	697.19	5	34	22383	70533	8.24543	5815.76
2012	AZ	Arizona	2012_AZ	297077	8.3	6556344	1	0	45311.4	0					5	25	2585638	1061.08	11.2941	119.84	5	25	305250	8105.99	9.52959	772.468	5	21	7740	134024	6.53186	8754.24
2013	AZ	Arizona	2013_AZ	298860	7.7	6634690	1	0	45045	2	2.26	2.07			5	25	2630595	1048.67	11.7147	122.849	5	26	308857	8104.89	9.84712	798.098	5	21	7624	136910	6.6564	9113.26
2008	IA	Iowa	2008_IA	160469	4.2	3016734	0	0	53193	2		1.18	22.19		3	183	1325990	884	9.49046	83.94	3	178	211241	4804	7.18372	345.11	3	107	6187	259106	4.80757	12456.7
2008	ID	Idaho	2008_ID	63878.2	5.1	1534320	0	1	41632.9	2	7.81		23.55		3	30	654545	1087	6.99154	76.01	3	27	99003	5091	5.72304	291.37	3	25	26210	29611	4.48457	1327.91
2008	IL	Illinois	2008_IL	759095	6.3	12747038	0	0	59550.7	2	1.2	1.58			6	74	5098579	765	11.0679	84.62	6	73	586611	7354	11.7903	867.11	6	52	6016	630308	4.54279	28633.5
2014	AZ	Arizona	2014_AZ	301721	6.8	6732873	1	0	44813.1	2		2.1		5.15	5	24	2661694	1012.7	11.8994	120.506	5	25	312221	7817.61	10.1323	792.105	5	22	7710	158471	6.46365	10243
2008	KS	Kansas	2008_KS	147265	4.6	2808076	0	0	52443.4	2		1.41	22.2		4	151	1203021	928	8.88337	82.41	4	149	219462	5832	7.42464	432.99	4	82	19554	45880	5.69122	2611.11
2015	AZ	Arizona	2015_AZ	308583	6.1	6832810	1	0	45161.9	0					5	24	2689223	1027.78	12.1305	124.675	5	25	314756	7753.21	10.3908	805.622	5	22	7759	159939	6.26295	10016.9
2016	AZ	Arizona	2016_AZ	319008	5.4	6944767	1	0	45935.1	0					5	34	2725510	1030.11	12.153	125.188	5	25	318197	7742.62	10.4119	806.152	4	21	8130	153502	6.06783	9314.24
2008	MA	Massachusetts	2008_MA	447527	5.5	6468967	0	1	69180.6	1			0.48		5	45	2647529	618	17.6815	109.3	5	45	379987	5830	15.8038	921.31	5	41	14066	55284	14.8536	8211.72
2008	MD	Maryland	2008_MD	338165	4.2	5684965	0	0	59484.2	1			3.71		4	12	2178595	1038	13.8392	143.69	4	12	241356	10359	12.7587	1321.7	3	8	8733	53914	10.3725	5592.2
2008	ME	Maine	2008_ME	59845.1	5.5	1330509	0	0	44979.1	2	7.29			9.86	1	7	695368	521	16.1983	84.47	1	7	87761	3939	12.976	511.07	0	4	2827	93578	11.704	10952.3
2008	MI	Michigan	2008_MI	455257	8	9946889	0	0	45768.8	1			1.93		9	60	4290313	666	10.7453	71.58	9	59	518776	6261	9.19514	575.67	9	47	12776	212015	6.73681	14283.1
2008	MN	Minnesota	2008_MN	309290	5.4	5247018	0	0	58945.9	3	2.65		1.66	9.11	5	175	2279850	817	9.73526	79.55	5	172	270442	6965	7.87858	548.75	4	116	9097	218116	5.87461	12813.5
2008	MO	Missouri	2008_MO	297882	6.1	5923916	0	0	50284.6	3	1.71		1.5	7.65	4	133	2686746	1098	8.00106	87.83	4	133	371220	6985	6.6105	461.78	4	92	9431	157726	4.92187	7763.06
2017	AZ	Arizona	2017_AZ	333099	4.9	7048088	1	0	47260.9	2	2.04			3.61	5	24	2764355	1032.53	12.4354	128.399	5	25	320562	7715.99	10.4957	809.846	4	21	8133	140436	6.45124	9059.89
2018	AZ	Arizona	2018_AZ	346398	4.8	7164228	1	0	48351.1	2			17.24	2.96	5	33	2808352	1028	12.77	131.31	5	25	322135	7678.86	10.6399	817.02	4	21	7794	149628	6.55	9796.76
2010	NC	North Carolina	2010_NC	484200	10.9	9574586	0	0	50571.4	4	2.64143	3.52	3.52	6.49	3	106	4185540	1238	10.12	125.2	3	105	644609	6197	8.16	505.55	3	70	11016	199073	6.17	12279.3
2019	AZ	Arizona	2019_AZ	359646		7291843	1	0	49321.6	2			16.89	2.14	5	35	2853183	1014	12.43	126.09	5	36	326191	7515	10.25	769.93	4	36	7899	145406	6.27773	9128.17
2020	AZ	Arizona	2020_AZ	362604			1	0		0					1	1	2896339	1113.69	12.2743	136.697	5	19	331229	7328.31	10.1082	740.763	4	16	7595	154851	6.06983	9399.21
2006	CO	Colorado	2006_CO	268191	4.3	4720423	1	0	56815	3	2.23		14.69	5.99	2	58	2030827	695.592	9.01998	62.7423	2	59	345297	4863.6	7.50496	365.011	2	42	13409	78335.6	5.88108	4606.97
2008	NJ	New Jersey	2008_NJ	573203	5.3	8711090	0	1	65801.5	1			20.38		4	14	3409806	711	15.6639	111.44	4	14	469341	7203	14.4836	1043.3	4	7	13391	65574	10.8619	7122.62
2007	CO	Colorado	2007_CO	278734	3.7	4803868	1	0	58022.8	3	2.01		18.45	4.19	2	58	2068901	710	9.25318	65.72	2	59	347171	4923	7.61802	375	2	42	12369	88345	5.96897	5273.3
2008	CO	Colorado	2008_CO	281803	4.8	4889730	1	0	57631.7	3	2.66		21.67	6.77	3	59	2173458	679	10.1264	68.8	3	60	359898	4759	8.57326	407.96	3	43	13170	87462	6.65038	5816.55
2008	NY	New York	2008_NY	1.3281e+06	5.4	19212436	0	1	69126.9	2	5.66			0.48	8	60	6897087	592	18.2981	108.41	8	60	1032105	6251	16.8375	1052.45	7	48	8779	139398	10.1369	14130.6
2008	OH	Ohio	2008_OH	580389	6.4	11515391	0	0	50401.2	2			20.65	0.48	7	116	4891891	910	10.0565	91.5	7	116	612492	6437	9.22411	593.74	8	99	21201	230416	6.18992	14262.6
2008	OK	Oklahoma	2008_OK	158988	3.7	3668976	0	0	43333	2			15.55	1.32	3	95	1633265	1115	9.09034	101.39	3	95	264439	5995	7.8779	472.24	3	65	17620	72812	5.89617	4293.14
2008	OR	Oregon	2008_OR	184843	6.5	3768748	0	1	49046.2	3	5.65		9.76	1.45	3	40	1616598	1026	8.49242	87.16	3	40	234525	5797	7.29168	422.67	3	36	22394	48172	5.21012	2509.83
2008	PA	Pennsylvania	2008_PA	665148	5.3	12612285	0	1	52738.1	1				2.09	11	59	5231696	861	11.3521	97.75	11	57	676337	5834	9.37866	547.13	10	45	27540	145639	7.01935	10222.9
2009	CO	Colorado	2009_CO	275659	7.3	4972195	1	0	55440.1	2			12.73	4.13	2	58	2111623	687	10	68.69	2	59	349267	4774	8.15	389.18	2	40	14918	75810	6.39	4843.28
2011	NC	North Carolina	2011_NC	484200	10.3	9658913	0	0	50129.9	3	2.68	3.63	22.01		3	106	4201898	1151	10.26	118.09	3	105	644926	6004	8.13	488.42	3	70	10609	208586	6.01	12546.2
2010	CO	Colorado	2010_CO	283964	8.7	5047539	1	0	56257.9	1				5.02	2	58	2128507	709	11.04	78.22	2	59	350073	4665	9.13	426.11	2	40	15060	83952	6.9	5796.27
2011	CO	Colorado	2011_CO	283964	8.4	5121900	1	0	55441.1	4	2.33	1.72	23.63	4.81	2	58	2141780	711	11.27	80.12	2	59	347903	4764	9.44	449.84	2	39	16425	77330	7.06	5458.56
2012	CO	Colorado	2012_CO	289340	7.9	5193660	1	0	55710.1	3	2.28	1.84		4.01	2	41	2149637	706.335	11.4591	80.9396	2	41	348752	4778.28	9.39312	448.83	2	30	16017	80202.5	6.94648	5571.25
2008	UT	Utah	2008_UT	133663	3.6	2663029	0	1	50192.1	2			22.17	6.38	1	50	924826	792	8.25501	65.36	1	51	115149	7444	6.66439	496.1	1	31	9427	80320	4.58986	3686.58
2008	VA	Virginia	2008_VA	462035	3.9	7833496	0	0	58981.9	2	10.97		21.37		4	33	3169282	1173	9.61538	112.75	4	33	404316	9662	7.32401	707.65	4	27	5284	290779	5.81597	16911.6
2013	CO	Colorado	2013_CO	301484	6.9	5270774	1	0	57199.2	4	2.5	1.91	23.6	4.7	2	41	2169365	711.764	11.929	84.9064	2	41	358800	4667.93	9.86176	460.339	2	31	16172	76020.6	7.34091	5580.6
2008	WA	Washington	2008_WA	401093	5.4	6562231	0	1	61121.5	2	2.19			8.31	3	60	2789188	1086	7.54336	81.89	3	60	349689	7120	6.75891	481.25	3	43	26034	67595	4.54714	3073.64
2014	CO	Colorado	2014_CO	315399	5	5352637	1	0	58924	3	2.69	1.93		5.21	2	40	2193520	687.363	12.1807	83.7253	2	41	360237	4656.51	10.0801	469.379	2	31	19234	65466.5	7.47423	4893.11
2008	WV	West Virginia	2008_WV	70966.8	4.3	1840310	0	0	38562.4	2	2.35		21.93		7	12	863650	1135	7.0621	80.15	7	12	135756	4736	6.07817	287.88	4	6	12015	102221	4.20443	4297.82
2008	WY	Wyoming	2008_WY	41641.2	3.1	546043	0	0	76259.9	3	1.15		22.63	7.44	5	35	252986	896	8.21441	73.56	5	31	59288	6200	6.70826	415.94	4	22	8888	89636	4.47304	4009.43
2015	CO	Colorado	2015_CO	330526	3.9	5454328	1	0	60598.9	4	2.22	1.83	14.74	3.52	2	40	2225725	688.35	12.1186	83.4181	2	41	365563	4652.2	9.8812	459.693	2	32	16229	78351.3	7.39916	5797.34
2016	CO	Colorado	2016_CO	337685	3.2	5543844	1	0	60911.7	2		1.85		3.12	2	48	2260068	694.438	12.074	83.8462	2	41	367001	4723	9.59629	453.233	2	33	16245	77477.3	7.34859	5693.49
2017	CO	Colorado	2017_CO	350209	2.7	5617421	1	0	62343.4	4	2.2	1.77	14.69	3.44	2	40	2288358	677.888	12.1652	82.4666	2	41	370691	4640.16	9.89026	458.924	2	33	16228	79601.3	7.50319	5972.63
2018	CO	Colorado	2018_CO	365204	3.3	5697155	1	0	64103	3		1.64	16.41	3.62	2	48	2326976	691	12.15	83.9	2	41	376104	4658.13	10.0161	466.562	2	33	15985	83658	7.47	6248.21
2009	CA	California	2009_CA	2.11068e+06	11.2	36961229	0	1	57105.2	1			14.38		6	43	12910856	580	14.74	85.45	6	47	1801936	5601	13.42	751.56	6	39	76223	52297	10.07	5264.98
2019	CO	Colorado	2019_CO	383596		5758486	1	0	66614	1				3.07	2	57	2370164	682	12.18	83.07	2	58	380609	4622	10.43	482.27	2	41	14386	92051.4	7.396	6808.12
2009	CT	Connecticut	2009_CT	265531	7.9	3561807	0	0	74549.5	1				4.83	2	9	1447250	724	20.33	147.25	2	10	148175	7456	16.86	1257.12	2	9	4881	63034	14.92	9404.38
2009	DC	District of Columbia	2009_DC	115646	9.3	592228	0	0	195273	0					1	1	217635	712	13.76	97.94	1	1	30632	26426	12.96	3426.13	0	0	4	6354250	8.41	534538
2009	DE	Delaware	2009_DE	69186.2	8.3	891730	0	0	77586.5	2			11.59	4.87	1	11	393836	917	14.07	129.07	1	11	49057	7109	11.98	851.69	1	8	1242	183705	9.34	17165.1
2009	FL	Florida	2009_FL	840481	10.4	18652644	0	0	45059.6	0					5	53	8493591	1133	12.39	140.33	5	53	1125135	6834	10.77	735.96	5	34	20457	68917	9.32	6422.81
2020	CO	Colorado	2020_CO	380922			1	0		1	2.17				1	1	2400357	711.092	12.3585	87.8806	2	34	384518	4343.58	10.2908	446.99	2	31	15209	84552.3	7.48404	6327.92
2006	GA	Georgia	2006_GA	487525	4.7	9155813	1	0	53247.6	2			14.1	7.08	1	97	3924073	1157.82	8.90991	103.161	1	97	529687	7165.63	7.81309	559.857	1	73	15164	190080	5.38026	10226.8
2009	IA	Iowa	2009_IA	156737	6.4	3032870	0	0	51679.5	3	1.26	1.23	13.32		3	183	1324182	864	9.99	86.25	3	178	215993	4516	7.55	341.16	3	108	6608	229664	5.27	12113
2009	ID	Idaho	2009_ID	61276.1	8.8	1554439	0	1	39420.1	2	6		14.09		3	31	659776	1080	7.8	84.27	3	27	100210	4994	6.49	323.89	3	25	26570	25702	5.17	1329.45
2009	IL	Illinois	2009_IL	740794	10.2	12796778	0	0	57889.1	2	1.15	1.62			6	74	5074861	728	11.27	82.04	6	73	575801	7284	11.31	823.87	6	53	5893	586958	4.33	25400
2007	GA	Georgia	2007_GA	492239	4.5	9349988	1	0	52645.9	2			15.82	7.25	1	97	4001957	1171	9.09521	106.48	1	97	538632	7271	8.06622	586.5	1	74	14706	192971	5.53182	10674.8
2009	KS	Kansas	2009_KS	141902	6.9	2832704	0	0	50094.4	2		1.43	12.83		4	151	1209522	906	9.53	86.37	4	149	218800	5716	7.87	450.08	4	82	22873	36751	6.1	2243.07
2008	GA	Georgia	2008_GA	481860	6.2	9504843	1	0	50696.3	2			16.22	10.05	1	97	4034752	1148	9.92587	113.96	1	97	543498	7187	9.06662	651.66	1	75	15948	169973	6.67135	11339.5
2009	GA	Georgia	2009_GA	464017	9.9	9620846	1	0	48230.4	2			12.46	4.54	1	98	4061862	1132	10.13	114.64	1	98	545860	7035	8.94	629	1	74	15487	157918	6.12	9661.97
2009	MA	Massachusetts	2009_MA	441308	8.1	6517613	0	1	67710	1			3.48		5	45	2661985	610	16.87	102.85	5	45	375507	3945	15.37	606.47	5	41	16173	86328	14.08	12158.2
2009	MD	Maryland	2009_MD	336286	7	5730388	0	0	58684.6	2	2.3		3.03		4	12	2188390	1026	14.98	153.72	4	12	242640	10237	11.97	1225.27	4	9	8773	50209	9.92	4978.5
2009	ME	Maine	2009_ME	58771.8	8.1	1329590	0	0	44202.9	2	4.63			4.7	1	7	696822	521	15.65	81.6	1	7	87923	3859	12.55	484.06	0	3	2857	83185	9.95	8277.7
2009	MI	Michigan	2009_MI	416297	13.7	9901591	0	0	42043.5	1			2.03		9	60	4253786	644	11.6	74.69	9	59	520551	6063	9.24	560.11	9	47	13065	174710	6.99	12205
2009	MN	Minnesota	2009_MN	296875	7.8	5281203	0	0	56213.6	3	2.21		1.64	6.49	5	175	2290881	802	10.04	80.48	5	173	273429	6800	7.92	538.24	4	117	9425	173626	6.26	10867
2009	MO	Missouri	2009_MO	289567	9.3	5961088	0	0	48576.2	3	1.56		1.52	4.72	4	133	2687756	1061	8.54	90.66	4	133	368476	6874	6.96	478.43	4	90	8982	139636	5.42	7569.21
2010	GA	Georgia	2010_GA	481215	10.5	9712209	1	0	49547.5	2			17.04	5.09	1	97	4054145	1265	10.07	127.41	1	97	546011	7310	9.06	662.09	1	74	15648	165340	6.22	10289.4
2011	GA	Georgia	2011_GA	481215	10.2	9803630	1	0	49085.4	0					1	97	4056147	1186	11.05	131.15	1	97	548674	7128	9.87	703.41	1	74	16241	161736	6.6	10673
2012	NC	North Carolina	2012_NC	488126	9.3	9751810	0	1	50055	4	2.66	3.77	23.18	4.36	3	68	4230588	1076.91	10.9064	117.453	3	66	652401	5940.89	8.66443	514.745	3	53	10399	215535	6.42279	13843.3
2012	GA	Georgia	2012_GA	489027	9.2	9903580	1	0	49378.8	0					1	75	4071478	1098.29	11.1746	122.73	1	74	547610	6990.55	9.5784	669.583	1	61	17335	150104	5.97732	8972.18
2013	GA	Georgia	2013_GA	499900	8.2	9975592	1	0	50112.3	2	2.75		23.39		1	75	4101351	1087.94	11.4592	124.669	1	74	554350	6817.77	9.98657	680.861	1	60	18981	138048	6.27302	8659.77
2014	GA	Georgia	2014_GA	517512	7.1	10071204	1	0	51385.3	3	2.91		21.96	4.86	1	74	4137057	1151.53	11.6491	134.143	1	74	552712	7027.21	10.3566	727.779	1	60	20300	130744	6.64275	8684.97
2009	NJ	New Jersey	2009_NJ	546362	9.1	8755602	0	1	62401.4	2	2.24		12.18		4	14	3430837	676	16.31	110.29	4	14	476354	6889	13.83	952.82	4	7	13255	51868	11.81	6127.09
2015	GA	Georgia	2015_GA	540108	6	10183353	1	0	53038.4	1				3.17	1	74	4191209	1121.83	11.5402	129.461	1	74	560950	7004.68	9.88867	692.67	1	59	20685	129459	5.87232	7602.27
2016	GA	Georgia	2016_GA	561718	5.4	10308442	1	0	54491.1	1				2.99	1	75	4240421	1137.65	11.5034	130.868	1	74	567431	7014.33	9.81456	688.426	1	60	21774	123581	5.8351	7211.05
2009	NY	New York	2009_NY	1.3795e+06	8.3	19307066	0	1	71450.8	2	3.12			0.56	8	60	6916413	581	17.5	101.71	8	60	1034835	6068	15.51	940.83	7	48	8565	130537	8.98	11728.2
2009	OH	Ohio	2009_OH	550982	10.3	11528896	0	0	47791.4	2			12.71	1.72	7	116	4880393	878	10.67	93.66	7	116	613740	6160	9.65	594.58	8	98	21088	195553	6.71	13117.6
2009	OK	Oklahoma	2009_OK	156857	6.4	3717572	0	0	42193.3	1			14.13		3	95	1643674	1097	8.49	93.13	3	94	266110	5844	6.76	394.92	3	66	17752	66816	4.82	3220.54
2009	OR	Oregon	2009_OR	176952	11.3	3808600	0	1	46461.1	3	3.73		9.67	1.76	3	40	1623388	1017	8.68	88.23	3	40	236230	5636	7.49	421.92	3	36	22485	43589	5.45	2376.08
2009	PA	Pennsylvania	2009_PA	645207	8	12666858	0	1	50936.6	1				2.29	11	59	5235331	842	11.65	98.09	11	57	679215	5694	9.54	543.37	10	45	27412	132399	7.21	9541.18
2017	GA	Georgia	2017_GA	583543	4.7	10417031	1	0	56018.2	0					1	74	4296977	1062.21	11.8982	126.384	1	74	572861	6730.17	10.0879	678.933	1	60	23108	116304	5.95842	6929.89
2013	NC	North Carolina	2013_NC	497457	8	9846717	0	1	50520	4	2.84	3.8	22.55	4.99	3	68	4268019	1098.31	10.9731	120.518	3	66	654747	5937.25	8.75733	519.945	3	53	10276	217922	6.44874	14053.2
2018	GA	Georgia	2018_GA	600935	3.9	10519389	1	0	57126.4	2		2.75		3.9	1	75	4354021	1142	11.47	131.05	1	74	579468	6803.9	9.79266	666.282	1	61	23065	118129	6	7092.92
2019	GA	Georgia	2019_GA	620792		10628020	1	0	58410.9	1			14.98		1	94	4411521	1121	11.76	131.84	1	94	585573	6747	10.02	676.25	1	74	23539	114680	6.17078	7076.64
2020	GA	Georgia	2020_GA	602322			1	0		1				2.32	1	1	4487431	1081.17	12.0162	129.916	1	57	592220	6233.82	10.0815	628.462	1	44	23822	107771	5.7693	6217.6
2009	UT	Utah	2009_UT	130959	7.3	2723421	0	1	48086.1	2			14.13	3.56	1	50	932016	780	8.48	66.16	1	50	117905	7234	6.96	503.23	1	31	9480	75543	4.81	3635.9
2009	VA	Virginia	2009_VA	460075	6.7	7925937	0	0	58046.8	2	7.42		13.45		4	33	3189118	1170	10.61	124.06	4	33	407458	9577	8.06	771.55	4	27	5284	263026	6.91	18179.1
2006	HI	Hawaii	2006_HI	74892.9	2.6	1309731	1	0	57181.9	2		1.68	15.42		3	4	401592	660.378	23.3467	154.177	3	4	61334	4741.43	21.4229	1015.75	3	4	689	471184	17.9569	84610.1
2009	WA	Washington	2009_WA	390814	9.2	6667426	0	1	58615.4	2	2.24			5.14	3	59	2808333	1091	7.68	83.72	3	59	350805	7140	6.96	497.24	3	42	28635	67966	4.43	3011.2
2007	HI	Hawaii	2007_HI	76434.1	2.8	1315675	1	0	58095	2		1.85	16.19		3	4	407146	655	24.1217	158.02	3	4	62001	4731	21.9077	1036.55	3	4	682	472182	18.3775	86775.5
2009	WV	West Virginia	2009_WV	70886.5	7.7	1847775	0	0	38363.2	2	2.64		14.24		7	12	865647	1116	7.9	88.16	7	12	136653	4692	6.77	317.55	4	6	12207	74992	5.24	3931.7
2009	WY	Wyoming	2009_WY	40599.6	6.3	559851	0	0	72518.6	2			14.07	4.9	5	35	255383	887	8.58	76.12	5	31	59347	6021	7.28	438.43	4	22	8935	89109	4.83	4307.66
2008	HI	Hawaii	2008_HI	76830.2	4.3	1332213	1	0	57671.1	2		2.19	22.86		3	4	409668	628	32.4963	203.94	3	4	61684	4729	29.722	1405.68	3	4	673	471061	26.0479	122701
2009	HI	Hawaii	2009_HI	74118.5	7.2	1346717	1	0	55036.4	2		2.24	13.73		3	4	412843	617	24.2	149.25	3	4	60869	4638	21.86	1013.94	3	4	688	446088	18.14	80927.5
2010	HI	Hawaii	2010_HI	77174.2	6.9	1364004	1	0	56579.2	2		2.22	17.45		3	4	414568	601	28.1	168.86	3	4	60479	4622	25.93	1198.48	3	4	686	446123	21.94	97901.5
2011	HI	Hawaii	2011_HI	77174.2	6.8	1379562	1	0	55941.1	0					3	4	417531	585	34.68	202.72	3	4	60043	4675	32.37	1513.39	3	4	698	437533	28.4	124260
2010	CA	California	2010_CA	2.19289e+06	12.2	37319550	0	1	58759.7	0					6	43	12947917	562	14.75	82.85	6	47	1814634	5564	13.1	728.58	6	39	75160	54662	9.8	5355.65
2012	HI	Hawaii	2012_HI	78694	6	1395199	1	0	56403.4	0					3	4	419612	544.014	37.3433	203.153	3	4	60109	4489.32	34.8821	1565.97	3	4	706	432210	30.8211	133212
2010	CT	Connecticut	2010_CT	261556	9.1	3579173	0	0	73077.2	1				5.6	2	9	1451808	750	19.25	144.4	2	10	153847	7273	16.45	1196.26	2	9	4973	62219	14.5	9022.73
2010	DC	District of Columbia	2010_DC	122636	9.4	605282	0	0	202610	1			16.22		1	1	227550	778	14.01	108.93	1	1	26449	29016	13.42	3894.19	1	1	1	19133083	7.78	1.48907e+06
2010	DE	Delaware	2010_DE	71103.5	8.4	899647	0	0	79034.9	3		3.35	16.04	5.15	1	11	396114	1001	13.8	138.24	1	11	49986	7202	11.36	818.33	1	8	1241	169617	9.57	16235.8
2010	FL	Florida	2010_FL	849395	11.1	18846143	0	0	45070	1			16.19		5	53	8529204	1194	11.44	136.61	5	53	1127138	6773	9.76	661.09	5	35	18048	79719	8.85	7058
2013	HI	Hawaii	2013_HI	80534.9	4.9	1408822	1	0	57164.7	1		1.96			3	4	422386	514.706	36.9849	190.363	3	4	60467	4508.24	34.0536	1535.22	3	4	694	435052	29.8692	129946
2014	HI	Hawaii	2014_HI	81304.9	4.4	1415335	1	0	57445.7	2		2.49	22.98		3	4	425168	506.421	37.0417	187.587	3	4	60679	4397.32	34.2133	1504.47	3	4	716	429444	30.2171	129766
2010	IA	Iowa	2010_IA	164559	6	3050819	0	0	53939.4	3	1.42	1.33	16.56		3	182	1327896	913	10.42	95.19	3	177	217704	4603	7.91	364.23	3	108	6555	239831	5.36	12857.1
2010	ID	Idaho	2010_ID	62704	9	1570819	0	1	39918	2	5.8		17.7		3	31	664717	1020	7.99	81.46	3	28	101268	4826	6.64	320.43	3	23	26047	28142	5.15	1448.36
2010	IL	Illinois	2010_IL	772226	10.4	12840545	0	0	60139.6	3	1.26	1.69	17.28		4	72	5070056	799	11.52	92.03	4	71	578768	7406	8.88	657.52	4	53	5991	614535	6.82	41911.8
2015	HI	Hawaii	2015_HI	83857.6	3.6	1422999	1	0	58930.2	2		3.27	14.21		3	4	428339	513.872	29.6023	152.118	3	4	60631	4363.09	26.9271	1174.85	3	4	740	416166	23.057	95955.2
2010	KS	Kansas	2010_KS	147837	7.1	2858266	0	0	51722.5	3	1.55	1.51	16.27		4	151	1213036	985	10.03	98.73	4	149	220091	5844	8.25	481.9	4	82	23304	38086	6.23	2374.64
2016	HI	Hawaii	2016_HI	85670.4	3	1428885	1	0	59956.1	0					3	13	430941	505.043	27.468	138.725	3	4	60836	4261.84	24.6426	1050.23	3	4	801	387264	20.6947	80143.3
2017	HI	Hawaii	2017_HI	87436.4	2.4	1425763	1	0	61326	2		3.08	13.71		3	4	432952	506.153	29.5037	149.334	3	4	61236	4193.66	26.7735	1122.79	3	4	782	385005	22.92	88243.2
2010	MA	Massachusetts	2010_MA	472664	8.3	6566440	0	1	71981.8	1			0.65		5	45	2674717	667	14.59	97.34	5	45	379709	4004	14.53	581.81	5	41	16162	88253	13.71	12102.2
2010	MD	Maryland	2010_MD	360156	7.7	5788784	0	1	62216.2	3	2.76	3.47	3.47		4	12	2200368	1096	14.32	156.94	4	12	244264	10498	11.75	1233.62	4	9	8766	48322	9.57	4625.39
2010	ME	Maine	2010_ME	59429.7	8.1	1327651	0	0	44763	4	5.23	3.45	3.45	5.19	1	7	699625	521	15.71	81.83	1	7	88266	3872	12.51	484.48	1	3	2821	90359	9.17	8283.87
2010	MI	Michigan	2010_MI	453989	12.6	9877597	0	0	45961.5	2		2.09	2.09		8	59	4245158	681	12.46	84.82	8	58	520233	6107	9.81	599.23	8	45	12827	200362	7.08	14180.8
2010	MN	Minnesota	2010_MN	315213	7.4	5310934	0	0	59351.8	4	2.42	1.75	1.75	5.96	5	175	2300291	814	10.59	86.19	5	171	276463	6787	8.38	568.83	4	116	10150	187174	6.29	11767.5
2010	MO	Missouri	2010_MO	292984	9.6	5996089	0	0	48862.6	4	1.67	1.57	1.57	5.2	4	134	2695809	1153	9.08	104.66	4	134	370955	7061	7.5	529.72	4	89	8899	162286	5.5	8930.37
2018	HI	Hawaii	2018_HI	88836.4	2.4	1423102	1	0	62424.5	3	11.87	3.28	16.98		3	13	436266	518	32.47	168.13	3	4	59661	4236.45	29.8983	1266.62	3	4	814	367880	26.1	96027.2
2019	HI	Hawaii	2019_HI	88945.3		1415615	1	0	62831.6	1			15.83		3	4	438352	525	32.06	168.21	3	4	59878	4256	29.23	1243.95	3	4	823	368089	25.7554	94802.7
2014	NC	North Carolina	2014_NC	509782	6.3	9937295	0	1	51299.9	3	3.01	3.58	3.58		3	67	4303476	1135.71	11.1021	126.088	3	67	655841	6036.72	8.75139	528.297	3	53	10356	216980	6.49679	14096.7
2020	HI	Hawaii	2020_HI	79592.5			1	0		0					1	1	442002	537.161	30.2821	162.664	3	4	59734	3744.8	28.4069	1063.78	3	4	816	333267	24.4516	81489
2006	IN	Indiana	2006_IN	312526	5	6332669	1	0	49351.3	2	1.64			7.52	5	118	2710178	992.754	8.22462	81.6502	5	116	332336	5975.38	7.21342	431.029	6	88	19147	215568	4.94912	10668.7
2007	IN	Indiana	2007_IN	322662	4.6	6379599	1	0	50577.1	2	1.78			7.37	5	118	2727752	1058	8.26147	87.44	5	116	336379	6136	7.29105	447.37	6	88	19684	211625	4.89063	10349.8
2010	NJ	New Jersey	2010_NJ	548479	9.5	8799451	0	1	62331.1	2	2.7		17.02		4	14	3454840	731	16.57	121.13	4	14	478687	6985	13.89	970.02	4	7	12960	54196	11.81	6399.05
2008	IN	Indiana	2008_IN	322384	5.9	6424806	1	0	50178.1	2	2.15			9.48	5	118	2733128	1036	8.87401	91.94	5	117	341154	6002	7.81685	469.14	6	90	18099	222900	5.46124	12173.1
2009	IN	Indiana	2009_IN	299789	10.3	6459325	1	0	46411.8	2	2.11			4.63	5	118	2733611	992	9.5	94.3	5	117	341437	5782	8.32	481.01	6	91	18264	196448	5.81	11409.4
2010	NY	New York	2010_NY	1.44035e+06	8.6	19399956	0	1	74244.8	3	3.51		15.96	5.62	8	60	6954916	610	18.74	114.39	8	60	1038260	6202	16.31	1011.56	7	48	8364	134310	8.78	11796
2010	OH	Ohio	2010_OH	580251	10.3	11539449	0	1	50284.2	1			16.75		7	116	4877229	931	11.32	105.33	7	116	612974	6325	9.73	615.73	8	96	20693	213878	6.4	13682.6
2010	OK	Oklahoma	2010_OK	163859	6.8	3760014	0	0	43579.4	1		1.71			3	95	1660653	1189	9.14	108.61	3	97	261932	6046	7.45	450.19	3	63	18356	68788	5.35	3680.85
2010	OR	Oregon	2010_OR	185959	10.6	3837614	0	1	48457	3	3.76	1.67	16.27		3	40	1629076	964	8.87	85.52	3	40	238450	5401	7.59	409.87	3	36	22638	43100	5.41	2330.44
2010	PA	Pennsylvania	2010_PA	676468	8.5	12711406	0	2	53217.4	2		2.4	16.26		11	59	5244278	878	12.7	111.5	11	57	678774	5815	10.1	587.19	10	45	27293	138795	7.66	10629.5
2010	IN	Indiana	2010_IN	321533	10.4	6490555	1	0	49538.6	2	2.28			4.87	5	118	2742789	1065	9.56	101.79	5	117	341727	5942	8.38	497.66	6	92	18796	206390	5.87	12123.5
2015	NC	North Carolina	2015_NC	525229	5.7	10037218	0	1	52328.2	2	2.68		13.22		3	67	4336698	1112.63	11.281	125.515	3	68	665198	6042.83	8.72886	527.47	3	51	10284	224468	6.5128	14619.2
2011	IN	Indiana	2011_IN	321533	9.1	6517250	1	0	49335.7	0					5	118	2744879	1030	10.06	103.54	5	117	343626	5847	8.77	513.04	6	91	17891	222524	6.17	13720.8
2012	IN	Indiana	2012_IN	323876	8.3	6538989	1	0	49530	0					5	64	2755595	996.866	10.5265	104.935	5	62	344453	5811.65	9.14068	531.224	6	56	18525	216678	6.33844	13734
2013	IN	Indiana	2013_IN	333207	7.7	6570575	1	0	50712.1	3	2.66		22.96	4.04	5	64	2771260	1004.56	10.994	110.441	5	62	346933	5825.33	9.60023	559.245	6	56	18162	219357	6.69666	14689.6
2010	UT	Utah	2010_UT	138301	7.8	2775413	0	1	49830.8	2			17.81	4.34	1	50	936602	786	8.71	68.43	1	50	122340	7062	7.15	504.76	1	31	9431	77830	4.93	3839.18
2010	VA	Virginia	2010_VA	479571	7.1	8024004	0	1	59767.1	0					4	33	3258959	1239	10.45	129.43	4	33	419950	9532	7.65	729.5	4	27	5380	265508	6.66	17678.5
2014	IN	Indiana	2014_IN	343828	6	6596019	1	0	52126.6	1	2.76				5	62	2784660	1008.62	11.4575	115.563	5	61	348699	5766.58	9.9588	574.282	6	56	18106	225931	6.96597	15738.3
2010	WA	Washington	2010_WA	411576	10	6743009	0	1	61037.4	4	2.93	2.22	19.87	5.36	3	59	2825281	1030	8.04	82.75	3	59	353330	6800	7.37	501.22	3	41	27970	79349	4.07	3233.1
2015	IN	Indiana	2015_IN	341205	4.8	6611442	1	0	51608.3	1		2.32			5	62	2804861	963.853	11.5687	111.505	5	61	350474	5711.71	9.77936	558.569	6	58	18213	219761	6.86019	15076
2010	WV	West Virginia	2010_WV	73175.2	8.7	1854265	0	1	39463.2	3	2.52	2.48	17.09		5	10	867948	1195	8.79	105.05	5	10	137209	4836	7.66	370.5	4	6	12348	78440	5.86	4595.98
2010	WY	Wyoming	2010_WY	38929.8	6.4	564531	0	0	68959.5	3		1.29	17.36	5.67	5	35	257447	883	8.77	77.43	5	31	59642	6032	7.42	447.3	4	20	8933	93932	4.98	4676.34
2016	IN	Indiana	2016_IN	348439	4.4	6637898	1	0	52492.4	1				2.92	5	64	2821546	975.41	11.7861	114.962	5	61	350645	5758.15	10.0101	576.394	6	58	18085	213940	6.97326	14918.6
2017	IN	Indiana	2017_IN	357536	3.6	6662068	1	0	53667.4	0					5	62	2834090	927.739	12.2919	114.037	5	61	352015	5600.37	10.5448	590.551	6	58	17917	203426	7.54057	15339.5
2018	IN	Indiana	2018_IN	368763	3.4	6698481	1	0	55051.7	1	2.35				5	64	2863358	1006	12.26	123.39	5	61	354730	5709.79	10.5984	605.146	6	58	17769	212523	7.38	15690.8
2019	IN	Indiana	2019_IN	371044		6731010	1	0	55124.6	2	2.26			2.59	5	112	2887031	960	12.58	120.74	5	111	358791	5462	11.03	602.46	6	94	18805	200818	7.35872	14777.7
2011	CA	California	2011_CA	2.19289e+06	11.7	37636311	0	1	58265.2	0					6	44	13002980	567	14.78	83.7	6	47	1818049	5628	13.05	734.21	6	39	73297	56773	10.11	5737.46
2020	IN	Indiana	2020_IN	359185			1	0		0					1	1	2920266	938.224	12.8262	120.338	5	44	363465	5043.24	11.2066	565.177	6	43	19383	181701	6.97945	12681.7
2011	CT	Connecticut	2011_CT	261556	8.8	3588632	0	0	72884.5	0					2	9	1453864	740	18.11	134.07	2	10	150087	7266	15.57	1131.51	2	9	4757	64260	13.24	8508.16
2011	DC	District of Columbia	2011_DC	122636	10.2	620290	0	0	197708	1	15.25				1	1	229450	749	13.4	100.3	1	1	26496	28199	12.9	3638.99	1	1	1	18020333	6.89	1240750
2011	DE	Delaware	2011_DE	71103.5	7.5	907590	0	0	78343.2	2	4.6	3.41			1	11	398109	970	13.7	132.83	1	11	50369	7048	10.64	749.74	1	8	1238	174432	8.91	15543.7
2011	FL	Florida	2011_FL	849395	10	19055607	0	0	44574.6	0					5	53	8575892	1131	11.51	130.1	5	53	1139656	6711	9.85	661	5	35	17335	81173	8.55	6941.28
2006	KY	Kentucky	2006_KY	186333	5.7	4219239	1	0	44162.6	2		1.73	14.4		4	59	1899764	1138.25	7.0207	79.9132	4	59	289117	5459.47	6.43514	351.324	4	51	6248	584900	4.04996	23688.2
2007	KY	Kentucky	2007_KY	185790	5.4	4256672	1	0	43646.8	2		1.77	16.27		4	59	1917257	1217	7.3406	89.35	4	59	293501	5688	6.75601	384.31	4	51	6239	592585	4.47214	26501.2
2011	IA	Iowa	2011_IA	164559	5.5	3066772	0	0	53658.8	4	1.48	1.43	22.91	5.44	3	182	1329905	898	10.46	93.94	3	178	219229	4595	7.85	360.85	3	108	7378	217315	5.21	11326.9
2011	ID	Idaho	2011_ID	62704	8.3	1584272	0	1	39579.1	2	6.05		23.65		3	31	667243	1048	7.87	82.5	3	28	101424	4905	6.41	314.63	3	23	26258	28285	5.1	1443.12
2011	IL	Illinois	2011_IL	772226	9.7	12867783	0	1	60012.3	4	1.3	1.72	23.09	5.15	4	72	5089449	770	11.78	90.8	4	71	587337	7161	8.64	618.78	4	52	5843	639570	6.42	41060.3
2008	KY	Kentucky	2008_KY	186516	6.4	4289878	1	0	43478.1	2		2.18	21.45		4	59	1928082	1191	7.94459	94.64	4	59	296069	5536	7.28786	403.47	5	52	6304	610694	4.81507	29405.3
2011	KS	Kansas	2011_KS	147837	6.5	2869677	0	0	51516.9	4	1.8	1.75	22.21	4.71	4	151	1215411	983	10.65	104.7	4	149	221844	5863	8.78	514.76	4	85	23986	37548	6.71	2519.88
2009	KY	Kentucky	2009_KY	178113	10.3	4317074	1	0	41257.8	2		2.17	14.17		4	58	1922294	1150	8.37	96.26	4	58	293614	5306	7.63	404.75	5	52	7056	514786	4.91	25300.4
2010	KY	Kentucky	2010_KY	188390	10.2	4348464	1	0	43323.3	2		2.26	16.55		4	58	1930666	1258	8.57	107.77	4	58	297050	5445	7.88	429.12	5	52	7268	516217	5.05	26071
2011	MA	Massachusetts	2011_MA	472664	7.3	6614218	0	1	71461.9	4	4.29	3.68	3.68	4.88	5	45	2693548	633	14.67	92.92	5	45	389864	3798	14.33	544.37	5	40	21021	67288	13.38	9000.45
2011	MD	Maryland	2011_MD	360156	7.2	5840241	0	2	61668	0					4	12	2208015	1030	13.31	137.17	4	12	245003	10459	11.28	1179.53	4	9	8900	46886	8.76	4108.44
2011	ME	Maine	2011_ME	59429.7	7.9	1328473	0	0	44735.3	2			17.75	4.81	1	7	701335	521	15.38	80.09	1	7	88791	3771	12.29	463.51	1	3	2823	89023	8.88	7908.07
2011	MI	Michigan	2011_MI	453989	10.4	9883053	0	0	45936.1	3	2.44	2.66	2.66		8	59	4249136	683	13.27	90.63	8	58	521322	6172	10.33	637.64	8	44	12961	203329	7.32	14884.6
2011	MN	Minnesota	2011_MN	315213	6.5	5346620	0	0	58955.6	4	2.46	1.93	1.93	5.88	5	175	2308736	813	10.96	89.14	5	171	276286	6748	8.63	582.1	4	118	10673	184412	6.47	11926.7
2011	MO	Missouri	2011_MO	292984	8.5	6011182	0	0	48739.9	4	1.77	1.72	1.72	4.97	4	133	2693261	1112	9.75	108.39	4	133	370920	6956	8.04	559.61	4	88	8759	164875	5.85	9639.49
2011	KY	Kentucky	2011_KY	188390	9.4	4370817	1	0	43101.7	1			23.03		4	58	1928523	1175	9.2	108.16	4	58	294450	5298	8.49	449.79	5	51	7426	489490	5.33	26104
2012	KY	Kentucky	2012_KY	192060	8.2	4387865	1	0	43770.7	0					4	50	1924644	1129.94	9.42906	106.542	4	49	298211	5241.23	8.72913	457.514	5	47	7134	516259	5.35026	27621.2
2016	NC	North Carolina	2016_NC	536308	5.1	10161802	0	1	52776.9	4	2.29	3.1	10.58	3.68	3	68	4423532	1101.25	11.0271	121.436	3	68	672610	6021.84	8.61961	519.059	3	52	10052	226629	6.31194	14304.7
2013	KY	Kentucky	2013_KY	196698	8	4406906	1	0	44634	4	2.43	2.36	22.61	5.74	4	50	1935245	1153.52	9.79181	112.95	5	50	297108	5891.29	8.56021	504.307	4	46	7185	428805	5.66476	24290.8
2014	KY	Kentucky	2014_KY	196796	6.5	4416992	1	0	44554.3	3		2.34	21.42	6.02	4	49	1939489	1177.28	10.1643	119.662	5	50	297182	5371.72	9.4379	506.978	4	46	7376	364726	5.67648	20703.6
2015	KY	Kentucky	2015_KY	199487	5.3	4429126	1	0	45039.8	2			13.21	3.52	4	49	1947068	1119.98	10.2428	114.717	5	51	299462	5451.22	9.4351	514.328	4	46	7392	341375	5.48473	18723.5
2011	NJ	New Jersey	2011_NJ	548479	9.3	8828552	0	1	62125.6	4	2.5	4.18	4.18	5.11	4	14	3457325	709	16.23	115.04	4	14	481663	6768	13.47	911.35	4	7	12715	52649	11.43	6015.64
2016	KY	Kentucky	2016_KY	201007	5.1	4440306	1	0	45268.8	0					4	50	1957188	1121.44	10.4907	117.647	4	50	302040	5512.82	9.5711	527.638	4	46	7308	321953	5.66739	18246.3
2017	KY	Kentucky	2017_KY	203564	4.9	4455590	1	0	45687.3	4	2.2	1.99	12.78	3.64	4	49	1971002	1052.03	10.8506	114.152	4	50	304457	5280.58	9.85056	520.167	4	46	7010	338318	5.71522	19335.6
2011	NY	New York	2011_NY	1.44035e+06	8.3	19499921	0	1	73864.2	3	3.51	3.27		5.44	8	60	6987631	611	18.26	111.59	8	60	1035992	6146	15.81	971.64	7	48	8222	136019	7.83	10656.8
2011	OH	Ohio	2011_OH	580251	8.8	11545735	0	1	50256.8	1			22.32		6	115	4874482	918	11.42	104.86	6	115	611235	6423	9.63	618.26	7	98	19712	227921	6.12	13943.6
2011	OK	Oklahoma	2011_OK	163859	5.9	3788824	0	0	43248.1	3	2.91	1.76		4.45	3	95	1667223	1221	9.47	115.61	3	94	264782	6173	7.6	468.9	3	64	18242	72218	5.46	3943.34
2011	OR	Oregon	2011_OR	185959	9.5	3872672	0	1	48018.4	1				4.04	3	40	1633551	991	9.54	94.51	3	40	238908	5495	8.15	447.99	3	36	23300	42787	5.47	2338.89
2011	PA	Pennsylvania	2011_PA	676468	7.9	12747052	0	2	53068.6	0					11	59	5249827	870	13.26	115.33	11	57	684757	5298	10.03	531.26	10	46	25047	164975	7.73	12755.1
2018	KY	Kentucky	2018_KY	205940	4.3	4464273	1	0	46130.7	2		1.96		3.59	4	51	1980209	1166	10.6	123.57	4	51	305417	5451.7	9.73907	530.944	4	47	6750	357005	5.68	20279
2017	NC	North Carolina	2017_NC	546810	4.5	10275758	0	1	53213.6	2	2.33		0.67		3	68	4488039	1042.29	10.9353	113.977	3	69	680967	5860.59	8.44201	494.752	3	52	10045	227255	6.2035	14097.8
2019	KY	Kentucky	2019_KY	211740		4472345	1	0	47344.2	3	2.16		14.68	3.22	4	58	1991137	1112	10.8	120.08	4	59	309830	5275	10.15	535.46	4	50	6147	395326	5.57051	22021.7
2020	KY	Kentucky	2020_KY	206289			1	0		0					1	1	2013910	1073.17	10.8672	116.623	4	47	312014	4823.86	10.3392	498.751	4	43	5982	387328	5.31265	20577.4
2006	LA	Louisiana	2006_LA	247140	4.5	4302665	1	0	57438.8	3	3.16	1.77	2.32		5	40	1857363	1261.32	9.13529	115.226	5	40	258698	7080.15	9.02531	639.061	5	29	20378	111938	6.87163	7691.98
2011	UT	Utah	2011_UT	138301	6.7	2814797	0	1	49133.6	0					1	50	946468	788	8.96	70.61	1	50	122363	7181	7.35	528.11	1	32	9378	82933	5.1	4228.6
2011	VA	Virginia	2011_VA	479571	6.6	8102437	0	1	59188.5	0					3	32	3225395	1183	10.64	125.86	3	32	414137	9468	7.95	753.15	3	26	4082	351503	6.49	22824.3
2007	LA	Louisiana	2007_LA	234216	4.3	4375581	1	0	53528.1	3	3.48	2.13	2.42		5	40	1885657	1276	9.37333	119.62	5	40	261148	7303	9.12642	666.54	5	29	21336	108576	6.77273	7353.53
2011	WA	Washington	2011_WA	411576	9.3	6827479	0	1	60282.2	2	3.21	2.21			3	59	2837631	1068	8.28	88.41	3	58	354185	6919	7.49	518.4	3	41	27845	83596	4.09	3417.73
2008	LA	Louisiana	2008_LA	237062	4.9	4435586	1	0	53445.4	3	4.56	2.36	2.66		5	39	1919826	1252	10.2843	128.77	5	39	265230	7207	10.1231	729.61	5	28	20299	110562	7.94126	8780.03
2011	WV	West Virginia	2011_WV	73175.2	8.1	1856606	0	1	39413.4	0					5	9	868036	1128	9.39	105.89	5	9	137965	4692	8.14	382.04	4	6	12446	78475	6.18	4849.24
2011	WY	Wyoming	2011_WY	38929.8	5.8	567491	0	0	68599.9	0					5	35	258528	903	9.11	82.28	5	31	59872	6059	7.72	467.44	4	20	9067	94316	5.41	5101.91
2009	LA	Louisiana	2009_LA	241869	6.8	4491648	1	0	53848.6	3	2.52	2.35	2.2		5	39	1946996	1273	8.1	103.19	5	39	269166	7214	7.69	555.09	5	28	18534	115163	5.25	6050.34
2010	LA	Louisiana	2010_LA	241236	8	4544635	1	0	53081.5	3	2.83	2.4	2.4		5	39	1973174	1380	8.98	123.96	5	38	274177	7356	8.5	625.39	5	28	18128	129573	5.84	7568.84
2011	LA	Louisiana	2011_LA	241236	7.8	4576244	1	0	52714.8	1			8.96		5	38	1979175	1348	8.96	120.84	5	37	277004	7305	8.44	616.84	5	27	18090	138467	5.69	7880.02
2012	LA	Louisiana	2012_LA	242417	7.1	4602067	1	0	52675.6	1			2.21		5	25	1995661	1253.83	8.37376	104.993	5	24	279613	7225.68	7.75367	560.255	5	20	18143	139856	4.75874	6655.37
2012	CA	California	2012_CA	2.25544e+06	10.4	37944551	0	1	59440.3	0					6	42	13101887	573.136	15.3385	87.9108	6	43	1834779	5531.62	13.4058	741.559	5	35	73805	53013.2	10.4905	5561.37
2013	LA	Louisiana	2013_LA	236482	6.7	4626040	1	0	51119.8	4	2.73	2.9	9.49	3.87	5	25	2011044	1272.52	9.42871	119.983	5	24	281835	7171.44	8.96332	642.799	5	20	19019	135099	5.92031	7998.3
2012	CT	Connecticut	2012_CT	263650	8.3	3595211	0	0	73333.6	0					2	9	1454651	730.853	17.3433	126.754	2	10	150435	7188.07	14.6523	1053.22	2	9	4647	63947.1	12.6729	8103.97
2012	DC	District of Columbia	2012_DC	123568	9	635737	0	0	194370	2	22.91		22.91		1	1	231550	720.696	12.2815	88.512	1	1	26547	27351.9	12.0225	3288.38	1	1	1	18198000	5.45788	993225
2012	DE	Delaware	2012_DE	70562.4	7.2	915518	0	0	77073.7	3		3.35	22.91	3.31	1	11	399998	942.022	13.5798	127.925	1	10	51056	6925.45	10.1295	701.516	1	7	854	268796	8.35743	22464.4
2012	FL	Florida	2012_FL	857861	8.5	19302016	0	1	44444.1	0					5	46	8645207	1080.82	11.4217	123.448	5	45	1160572	6608.65	9.66431	638.681	5	30	17414	78603.3	8.03544	6316.12
2014	LA	Louisiana	2014_LA	243043	6.4	4645938	1	0	52313	0					5	24	2026223	1291.43	9.57136	123.607	5	24	297789	6854.06	9.1015	623.823	5	21	19553	147988	6.04746	8949.53
2015	LA	Louisiana	2015_LA	239584	6.3	4666998	1	0	51335.8	1			4.53		5	24	2043760	1286.24	9.3313	120.023	5	24	298170	6986	8.66484	605.325	5	21	19646	148984	5.41208	8063.11
2012	IA	Iowa	2012_IA	170924	5	3076844	0	0	55551.6	4	1.56	1.48	22.91	3.76	3	94	1334596	873.399	10.8194	94.4965	3	91	221154	4600.79	8.00742	368.405	3	70	7255	224118	5.29526	11867.6
2012	ID	Idaho	2012_ID	62007.3	7.2	1595910	0	1	38853.9	3	3.95		24.39	4.2	3	18	673368	1009.77	8.66713	87.5179	3	16	102319	4868.86	6.86384	334.19	3	14	26523	30082	5.4783	1647.98
2012	IL	Illinois	2012_IL	790723	9	12883029	0	1	61377.1	4	1.39	1.93	24.35	3.25	4	38	5098647	766.574	11.375	87.1978	4	36	590142	7174.53	7.98788	573.093	4	28	6042	624482	5.79778	36206.1
2016	LA	Louisiana	2016_LA	235554	6.1	4681346	1	0	50317.6	3	2.12		2.54	2.68	4	26	2059699	1240.07	9.33754	115.792	4	23	289780	7159.37	8.59337	615.231	4	20	19231	155542	5.07619	7895.59
2012	KS	Kansas	2012_KS	150077	5.7	2886024	0	0	52001.3	2		1.83	22.93		4	67	1217256	944.52	11.2426	106.188	4	67	223822	5754.46	9.2356	531.458	4	58	25017	36778.7	7.08909	2607.27
2017	LA	Louisiana	2017_LA	239831	5.1	4673673	1	0	51315.3	1	2.48				4	23	2073615	1186.81	9.73507	115.537	4	23	291404	7006.41	8.94886	626.994	4	20	19611	157907	5.47865	8651.19
2018	LA	Louisiana	2018_LA	245220	4.9	4664450	1	0	52572.2	1		3.12			4	26	2085055	1282	9.59	122.86	4	23	292752	7028.39	8.84915	621.953	4	21	19558	159426	5.35	8532.31
2012	MA	Massachusetts	2012_MA	483286	6.7	6664269	0	1	72519	4	3.04	3.59	3.59	3.55	5	31	2699141	627.158	14.9127	93.5264	5	30	389272	3794.01	13.8415	525.148	5	30	21145	66710.8	12.5666	8383.31
2012	MD	Maryland	2012_MD	361562	7	5888375	0	2	61402.6	1			2.21		4	10	2212287	1004.92	12.8366	128.998	4	9	246868	10163.2	10.4336	1060.38	4	6	8941	41940	8.09086	3393.31
2012	ME	Maine	2012_ME	59181.7	7.5	1328094	0	0	44561.4	1				3.55	1	5	703770	530.563	14.6588	77.7742	1	4	89048	3793.07	11.5274	437.244	1	2	2780	90741.5	7.98195	7242.94
2012	MI	Michigan	2012_MI	463303	9.1	9898289	0	0	46806.3	4	2.42	2.78	2.78	3.16	8	41	4250620	675.61	14.1349	95.4965	8	39	521091	6159.24	10.9345	673.484	8	28	13074	202921	7.62392	15470.5
2012	MN	Minnesota	2012_MN	321054	5.6	5377500	0	0	59703.2	4	2.32	1.98	1.98	3.71	5	114	2317336	793.283	11.3533	90.0636	5	110	278466	6732.06	8.84022	595.129	4	91	11010	177231	6.53658	11584.9
2012	MO	Missouri	2012_MO	296514	6.9	6026027	0	0	49205.6	1			22.83		4	74	2699287	1060.05	10.1694	107.801	4	73	373022	6809.86	8.1993	558.361	4	59	8901	164723	5.89262	9706.52
2019	LA	Louisiana	2019_LA	246361		4658285	1	0	52886.7	3	2.23	3.11		2.7	4	36	2095466	1232	9.8	120.7	4	35	295153	6856	8.91	610.86	4	28	19373	162797	5.22934	8513.19
2020	LA	Louisiana	2020_LA	228825			1	0		2	1.91	4.79			1	1	2112928	1200.58	9.66793	116.071	4	20	296222	6301.22	8.8514	557.746	4	19	19276	156829	4.88043	7653.93
2018	NC	North Carolina	2018_NC	556574	3.9	10391358	0	1	53561.2	2		3.15	17.12		3	69	4550420	1129	11.09	125.17	3	69	691673	5939.51	8.57787	509.483	3	52	10027	227387	6.33	14401.5
2006	MS	Mississippi	2006_MS	105880	6.5	2904978	1	0	36447.7	3	3.5		13.33	6.97	2	50	1212812	1255.77	9.6569	121.268	2	50	218193	4945.35	9.3677	463.266	2	48	7749	168966	5.94457	10044.3
2007	MS	Mississippi	2007_MS	107714	6.1	2928350	1	0	36783.1	3	4.18		14.43	7.21	2	50	1227001	1261	9.35855	118	2	50	222387	5021	8.92239	448.02	2	48	7505	179737	5.75354	10341.2
2008	MS	Mississippi	2008_MS	109434	6.6	2947806	1	0	37123.9	3	5.01		20.29	9.39	2	50	1238408	1231	10.3943	127.95	2	50	224391	4914	10.0163	492.23	2	47	7397	182449	6.55627	11961.9
2012	NJ	New Jersey	2012_NJ	560730	9.3	8845671	0	1	63390.3	2		4.05	4.05		4	9	3455302	691.28	15.7826	109.102	4	8	489943	6521.25	12.7772	833.23	4	6	12729	50817.9	10.5165	5344.27
2009	MS	Mississippi	2009_MS	105360	9.5	2958774	1	0	35609.3	3	3.05		12.73	4.29	2	50	1243260	1213	10.22	124	2	50	222861	4866	9.5	462.25	2	47	7151	174107	6.61	11513.5
2010	MS	Mississippi	2010_MS	106491	10.4	2970615	1	0	35848.2	3	3.5		16.83	4.83	2	50	1250149	1345	9.87	132.76	2	50	224517	5124	9.32	477.3	2	47	6797	192577	6.32	12174.1
2012	NY	New York	2012_NY	1.49628e+06	8.5	19574362	0	1	76440.8	4	2.93	3.12	23.56	3.84	8	22	7010740	602.546	17.6158	106.143	8	21	1038268	6101.34	15.0563	918.639	7	15	8144	140240	6.69594	9390.35
2012	OH	Ohio	2012_OH	586541	7.4	11550971	0	1	50778.5	0					6	59	4869305	894.853	11.7589	105.225	6	58	613259	6353.47	9.47184	601.791	7	51	19602	226930	6.23521	14149.5
2012	OK	Oklahoma	2012_OK	172016	5.2	3819320	0	0	45038.4	4	2.48	1.97	22.77	2.96	3	50	1679296	1131.91	9.50602	107.599	3	50	268014	6206.5	7.31979	454.303	3	44	18242	75694.4	5.08687	3850.48
2012	OR	Oregon	2012_OR	187352	8.8	3900102	0	1	48037.8	1				3.09	3	38	1642444	956.636	9.80485	93.7967	3	37	237780	5538.67	8.31136	460.339	3	34	23303	42932.9	5.58674	2398.55
2012	PA	Pennsylvania	2012_PA	689007	7.8	12769123	0	2	53958.8	0					11	26	5261381	837.487	12.7499	106.778	11	25	687750	5200.51	9.43714	490.779	10	24	24963	160367	7.22802	11591.3
2011	MS	Mississippi	2011_MS	106491	10	2979147	1	0	35745.5	4	3.37	3.87	3.87	4.28	2	50	1251640	1287	10.17	130.9	2	50	226136	5063	9.48	479.86	2	47	6931	195537	6.53	12772.2
2019	NC	North Carolina	2019_NC	568476		10501384	0	1	54133.4	3	2.15		14.67	3.58	3	106	4620856	1079	11.42	123.25	3	107	705587	5808	8.81	511.49	3	69	9871	231241	6.30338	14576
2012	MS	Mississippi	2012_MS	108646	9	2984599	1	0	36402.4	3	2.85	4.45	22.22		2	46	1256392	1193.41	10.2636	122.487	2	45	227384	4978.6	9.32655	464.331	2	44	7125	196612	6.23929	12267.2
2013	MS	Mississippi	2013_MS	109033	8.5	2989839	1	0	36467.7	2	3.17		1.01		2	46	1260892	1220.2	10.7764	131.493	2	45	228508	5174.08	10.101	522.634	2	41	7165	187622	6.33884	11893.1
2014	MS	Mississippi	2014_MS	109300	7.5	2991892	1	0	36531.9	3		3.27	3.27	4.58	2	45	1263583	1247.91	11.3162	141.216	2	45	230416	5126.45	10.7613	551.672	2	42	10922	124458	6.60264	8217.51
2012	UT	Utah	2012_UT	140622	5.4	2854146	0	1	49269.6	4	2.09	1.92	23.55	2.94	1	27	966063	792.582	9.92936	78.6983	1	27	115880	7768.67	8.05548	625.804	1	22	9417	85786.3	5.62043	4821.55
2012	VA	Virginia	2012_VA	483041	6.1	8187456	0	1	58997.7	1	2.17				3	29	3248518	1116.78	11.0783	123.72	3	28	419052	9298.1	8.07988	751.275	3	24	3973	363196	6.71512	24389
2015	MS	Mississippi	2015_MS	109402	6.4	2990231	1	0	36586.4	1			0.81		2	45	1270397	1217.54	11.2718	137.239	2	46	231388	5183.1	10.5462	546.618	2	42	10860	120770	6.56143	7924.23
2012	WA	Washington	2012_WA	426447	8.1	6898599	0	1	61816.5	0					3	48	2852760	1037.33	8.52774	88.4606	3	47	356028	6843.94	7.67554	525.309	3	37	27690	82999	4.12954	3427.47
2016	MS	Mississippi	2016_MS	109911	5.8	2990595	1	0	36752.2	0					2	46	1278616	1203.05	10.4663	125.915	2	46	232885	5196.61	9.57372	497.509	2	41	11214	119410	5.79402	6918.6
2012	WV	West Virginia	2012_WV	73124.5	7.5	1857446	0	1	39368.3	0					5	7	865673	1077.65	9.85013	106.15	5	6	138687	4664.47	8.42124	392.807	4	4	12472	79214.6	6.32899	5013.48
2012	WY	Wyoming	2012_WY	38085	5.3	576656	0	0	66044.6	2		1.45		5.86	5	22	261191	866.712	9.84736	85.3482	5	23	59268	5969.28	8.23998	491.868	4	14	9163	91030.7	6.02745	5486.83
2017	MS	Mississippi	2017_MS	110281	5.1	2990674	1	0	36875.1	2		2.66	2.66		2	45	1284578	1131.63	11.0792	125.376	2	46	235245	5050.11	10.1669	513.437	2	41	11156	120478	5.98915	7215.6
2018	MS	Mississippi	2018_MS	110175	4.8	2982879	1	0	36935.7	3		2.69	15.64	3.21	2	46	1290281	1247	11.12	138.63	2	46	236871	5111.86	10.4315	533.245	2	41	10988	125511	6	7531.7
2019	MS	Mississippi	2019_MS	110538		2978227	1	0	37115.3	0					2	48	1293419	1206	11.27	135.87	2	49	237625	4994	10.52	525.25	2	43	10379	128418	5.85311	7516.44
2020	MS	Mississippi	2020_MS	109894			1	0		0					1	1	1308149	1146.33	11.1728	128.078	2	41	237370	4628.9	10.3825	480.596	2	36	10343	123288	5.63455	6946.74
2013	CA	California	2013_CA	2.34034e+06	8.9	38253768	0	1	61179.2	4	3.89	1.96	23.23	4.4	6	43	13359503	557.15	16.1881	90.1921	6	46	1794018	5758.54	14.2228	819.023	5	38	71556	55200.6	10.962	6051.09
2006	MT	Montana	2006_MT	40055	3.5	952692	1	0	42044	1			15.33		4	36	449308	814.952	8.28282	67.501	4	35	96617	4041.72	7.44295	300.824	3	25	4734	83351.2	5.11591	4264.17
2013	CT	Connecticut	2013_CT	258911	7.8	3595792	0	0	72003.9	0					2	9	1454963	752.336	17.5542	132.066	2	11	150419	7207.15	14.6338	1054.68	2	10	4568	63670.1	12.6066	8026.61
2013	DC	District of Columbia	2013_DC	124095	8.5	651559	0	0	190458	0					1	1	235322	720.154	12.5675	90.5054	1	1	26530	26696.6	11.9413	3187.93	1	1	1	18948750	5.53691	1049175
2013	DE	Delaware	2013_DE	68656.8	6.7	924062	0	0	74298.9	3	3.84	3.2	22.83		1	11	403519	943.783	12.9533	122.251	1	10	51673	6705.3	10.1956	683.644	1	7	848	257473	8.43369	21714.5
2013	FL	Florida	2013_FL	880184	7.2	19551678	0	1	45018.3	3	3.91	3.41		5	5	46	8756322	1078.21	11.2717	121.532	5	45	1175896	6530.1	9.39111	613.249	5	31	17865	76450.8	7.60719	5815.76
2007	MT	Montana	2007_MT	42057.7	3.6	964706	1	0	43596.4	1			17.72		4	36	459379	824	8.77325	72.28	4	35	98720	4075	8.1044	330.28	3	26	4490	114379	5.15695	5898.44
2008	MT	Montana	2008_MT	42049.3	5.1	976415	1	0	43065	1			20.63		4	36	461600	843	9.12777	76.95	4	35	100371	4006	8.54268	342.25	3	26	4879	99601	5.90466	5881.08
2013	IA	Iowa	2013_IA	171069	4.7	3093935	0	0	55291.8	2			22.54	4.61	3	93	1343500	909.038	11.0453	100.406	3	89	222239	4671.82	8.43954	394.28	3	69	8413	194566	5.6243	10943
2013	ID	Idaho	2013_ID	64769.8	6.1	1612053	0	1	40178.5	2	4.11			4.35	3	18	680930	1054.84	9.32405	98.3538	3	17	103400	5037.31	7.3662	371.059	3	14	26846	28936.6	6.09859	1764.72
2013	IL	Illinois	2013_IL	795435	9	12895778	0	1	61681.8	3		1.88	23.49	4.82	4	38	5120607	754.667	10.6263	80.1933	4	36	596672	7049.2	8.14456	574.126	4	29	6498	569236	5.9428	33828.6
2009	MT	Montana	2009_MT	40938.4	6.8	983982	1	0	41604.8	1			12.74		4	35	464517	856	8.93	76.48	4	35	100207	3975	8.32	330.65	3	27	5225	76117	5.45	4148.97
2013	KS	Kansas	2013_KS	150703	5.3	2894306	0	0	52068.8	4	1.78	1.77	22.41	4.48	4	67	1222985	926.218	11.6443	107.851	4	67	224515	5658.5	9.67886	547.679	4	59	26394	34759.7	7.39283	2569.72
2010	MT	Montana	2010_MT	43532.2	7.3	990730	1	0	43939.5	2		1.41	15.01		4	35	467878	845	9.16	77.37	4	35	101129	3946	8.55	337.34	3	26	5217	62155	5.49	3411.07
2011	MT	Montana	2011_MT	43532.2	6.9	997518	1	0	43640.5	2			20.48	4.15	4	35	469963	871	9.75	84.97	4	35	101512	4016	9.12	366.1	3	25	5877	56473	5.27	2978.58
2013	MA	Massachusetts	2013_MA	486992	6.7	6715158	0	1	72521.3	2		4.21	4.21		5	31	2708759	637.673	15.8343	100.971	5	31	391856	3766.92	14.2348	536.215	5	31	16594	82677.2	13.1762	10893.7
2013	MD	Maryland	2013_MD	364633	6.6	5925197	0	2	61539.4	4	2.52	3.43	3.43	4.79	4	10	2218948	1030.83	13.2543	136.63	4	10	247168	10103.2	10.6843	1079.46	4	7	8788	37398.9	8.36437	3128.19
2013	ME	Maine	2013_ME	59013.9	6.6	1328543	0	0	44420	3		4.21	4.21	5.83	1	5	704775	551.276	14.354	79.1301	1	4	89336	3745.79	11.7407	439.783	1	2	2962	89386.1	8.34089	7455.59
2013	MI	Michigan	2013_MI	472780	8.8	9914802	0	0	47684.3	4	2.51	2.66	2.66	4.49	8	41	4265264	664.538	14.5896	96.9531	8	39	520327	6037.47	11.0638	667.975	8	29	13419	194510	7.71572	15007.8
2013	MN	Minnesota	2013_MN	329774	5	5414722	0	0	60903.3	3	2.65	2	2		5	114	2329734	817.316	11.8081	96.5097	5	111	281187	6828.55	9.4213	643.338	4	92	11383	166434	6.982	11620.4
2013	MO	Missouri	2013_MO	302026	6.7	6042989	0	0	49979.5	4	1.92	1.9	1.9	4.45	4	74	2708934	1086.47	10.6036	115.205	4	73	371712	6841.15	8.80432	602.317	4	58	10274	142360	6.2941	8960.29
2012	MT	Montana	2012_MT	44329.1	6	1004168	1	0	44145.1	0					4	31	473033	841.796	10.0832	84.8804	4	30	101530	4036.17	9.12833	368.435	3	24	7268	47783.8	5.10424	2439
2013	MT	Montana	2013_MT	45114.7	5.4	1014158	1	0	44484.9	3	2		23.85	5.21	4	31	477266	860.19	10.3294	88.8521	4	30	101216	4025.75	9.53565	383.881	3	26	8692	40545.5	5.42721	2200.49
2020	NC	North Carolina	2020_NC	564794			0	1		3	1.89	2.54	2.54		1	1	4695096	1040.83	11.3792	118.438	3	55	710220	5386.25	8.69	468.065	3	42	9822	219136	6.31152	13830.8
2014	MT	Montana	2014_MT	46166.7	4.7	1022657	1	0	45143.9	1			22.73		4	30	485041	853.75	10.1819	86.9277	4	30	103132	3961.88	9.64174	381.994	3	28	9597	36730.1	5.49206	2017.24
2015	MT	Montana	2015_MT	47765.6	4.2	1031495	1	0	46307.2	3	1.77	1.72	1.72		4	30	491422	818.24	10.8804	89.0281	4	30	104325	3909.33	10.2269	399.803	3	28	9710	38513.6	5.32063	2049.16
2016	MT	Montana	2016_MT	47189.6	4.1	1042137	1	0	45281.6	0					4	31	497170	813.361	10.9357	88.947	4	30	105934	3800.82	10.1901	387.307	3	26	9814	37501	5.05619	1896.12
2013	NJ	New Jersey	2013_NJ	570952	8.2	8857821	0	1	64457.4	1				4.19	4	9	3461109	687.271	15.7287	108.099	4	9	482105	6608.36	12.7743	844.169	4	7	12369	50972.3	10.7976	5503.77
2017	MT	Montana	2017_MT	48470.5	3.9	1053862	1	0	45993.2	1				1.78	4	30	503313	865.033	10.9537	94.7533	4	30	107147	3865.5	10.1199	391.184	3	26	9893	38031.5	5.24817	1995.96
2018	MT	Montana	2018_MT	49455	3.7	1061818	1	0	46575.8	2		2.01	18.21		4	31	509526	850	10.96	93.19	4	30	108695	3772.97	10.107	381.334	3	27	9915	39670	5.19	2060.18
2013	NY	New York	2013_NY	1501818	7.7	19626488	0	1	76520	1	3.58				8	22	7027866	602.096	18.7948	113.163	8	21	1040398	6114.83	15.3541	938.876	7	16	7960	187510	6.58474	12347
2013	OH	Ohio	2013_OH	603057	7.5	11579692	0	1	52078.9	3		2.25	22.88	3.82	6	59	4875346	891.528	12.0102	107.074	6	59	613964	6341.02	9.34862	592.798	7	51	19360	221191	6.22031	13758.7
2013	OK	Oklahoma	2013_OK	176087	5.3	3853891	0	0	45690.7	3	2.89		22.33	3.98	3	50	1693151	1141.85	9.67427	110.466	3	49	271698	6086.15	7.76692	472.706	3	44	18471	76182.8	5.49155	4183.62
2013	OR	Oregon	2013_OR	189610	7.9	3924110	0	1	48319.2	2			22.05	3.81	3	38	1650803	975.715	9.89798	96.5761	3	37	235191	5697.62	8.68029	494.57	3	34	23392	43496.3	5.7985	2522.14
2013	PA	Pennsylvania	2013_PA	704195	7.4	12779538	0	2	55103.3	3	2.16	2.47		4	11	26	5272857	857.408	12.7892	109.656	11	25	689355	5215.63	9.24992	482.441	10	24	24601	162741	6.96872	11341
2019	MT	Montana	2019_MT	50318.9		1070123	1	0	47021.6	0					4	35	516052	857	11.13	95.43	4	35	109459	3773	10.41	392.75	3	31	11286	37340.4	5.45126	2035.52
2006	SC	South Carolina	2006_SC	187386	6.4	4357847	0	0	42999.7	2			14.92	7.75	4	47	1989801	1195.22	9.02709	107.894	4	46	329528	5291.03	7.60463	402.363	4	35	4462	586727	4.71347	27655.2
2020	MT	Montana	2020_MT	50159.6			1	0		0					1	1	522382	858.242	11.2425	96.4881	4	15	110977	3531.03	10.5143	371.264	3	13	11414	32868	5.17531	1701.02
2006	ND	North Dakota	2006_ND	30911.4	3.2	649422	1	0	47598.3	2	1.25		0.88		3	36	309997	1035.77	7.136	73.9128	3	35	53709	6402.64	6.30011	403.373	3	25	2331	116747	4.99616	5832.87
2007	ND	North Dakota	2007_ND	32529	3.1	652822	1	0	49828.3	2	1.31		0.98		3	36	314466	1078	7.30458	78.73	3	34	54550	6439	6.58457	423.95	3	25	2725	110817	5.23578	5802.14
2013	UT	Utah	2013_UT	145027	4.6	2898773	0	1	50030.4	3	2.3		22.44	3.97	1	27	981194	798.496	10.3685	82.7922	1	27	116263	7889.99	8.31782	656.275	1	23	9629	86634.2	5.87014	5085.55
2013	VA	Virginia	2013_VA	488741	5.7	8255861	0	1	59199.3	3		3.32	20.97	4.15	3	29	3273502	1156.16	10.8431	125.363	3	28	422713	9413.52	8.00025	753.105	3	23	3585	398661	6.62515	26411.9
2008	ND	North Dakota	2008_ND	35030.4	3.2	657569	1	0	53272.6	2	1.36		1.08		3	35	318760	1113	7.51497	83.68	3	33	56510	6577	6.811	447.97	3	25	2143	143759	5.58825	8033.64
2013	WA	Washington	2013_WA	439472	7	6966252	0	1	63085.9	4	2.68	1.96	23.6	4.5	3	49	2880008	1041.19	8.69666	90.5484	3	48	360855	6849.17	7.7792	532.81	3	38	27808	81615.1	4.23124	3453.33
2009	ND	North Dakota	2009_ND	35971.3	4.1	664968	1	0	54094.8	2	1.31		1.14		3	35	322466	1150	7.58	87.17	3	33	57435	6614	6.81	450.33	3	26	2488	121958	5.25	6399.79
2013	WV	West Virginia	2013_WV	73949	6.8	1854768	0	1	39869.7	2	2.53		23.43		5	7	863641	1117.54	9.52443	106.439	5	6	139514	4655.16	8.16665	380.17	4	4	12314	81347.3	6.20052	5043.96
2013	WY	Wyoming	2013_WY	38408.7	4.7	582620	0	0	65924.1	2	1.55		23.33		5	22	263614	894.457	10.1566	90.8462	5	23	58015	5841.65	8.57005	500.632	4	14	10134	83523.9	6.41992	5362.17
2010	ND	North Dakota	2010_ND	43300.4	3.8	674752	1	0	64172.3	3	1.48	1.25	1.25		3	35	326409	1121	8.13	91.16	3	33	58568	6707	7.21	483.78	3	25	2641	121468	5.81	7060.46
2011	ND	North Dakota	2011_ND	43300.4	3.5	685526	1	0	63163.8	4	1.56	1.34	1.34	7.83	3	35	330738	1147	8.58	98.46	3	33	60017	6757	7.61	513.86	3	26	3639	98895	6.24	6171.01
2012	ND	North Dakota	2012_ND	53326.8	3.1	702227	1	0	75939.5	4	1.65	1.49	1.49	5.71	3	24	342549	1091.03	9.06028	98.85	3	22	63160	6740.31	8.02306	540.779	3	22	4602	92778.2	6.55199	6078.82
2013	ND	North Dakota	2013_ND	54690.9	2.9	723149	1	0	75628.8	2	1.8		23.28		3	24	348486	1204.94	9.11638	109.847	3	22	66801	7092.14	8.38873	594.941	3	21	6683	66200	7.12639	4717.67
2014	CA	California	2014_CA	2.42868e+06	7.5	38586706	0	1	62940.7	1		2.49			6	42	13256068	561.76	16.2458	91.2626	6	44	1676201	5940.72	15.6185	927.854	5	37	146944	29999.2	12.3362	3700.77
2014	ND	North Dakota	2014_ND	60193	2.7	738736	1	0	81481.1	2		1.53	21.2		3	23	360171	1239.58	9.14736	113.389	3	22	67871	6634.52	8.78548	582.875	3	22	8607	72409.3	7.61988	5517.5
2014	CT	Connecticut	2014_CT	260606	6.6	3595697	0	0	72477.1	2	3.34		20.01		2	9	1459239	729.694	19.7483	144.102	2	10	155372	6915.41	15.5476	1075.18	2	9	4648	63016.3	12.9156	8138.94
2014	DC	District of Columbia	2014_DC	126884	7.8	663603	0	0	191205	0					1	1	239355	721.455	12.7387	91.9042	1	1	26463	26918.8	12.1945	3282.63	1	1	1	20179083	8.41098	1.69726e+06
2014	DE	Delaware	2014_DE	73961.7	5.7	933131	0	0	79261.9	2			22.19	4.68	1	10	407508	949.847	13.2922	126.255	1	10	52203	6700.28	10.4986	703.435	1	7	862	241332	8.58045	20707.4
2014	FL	Florida	2014_FL	905648	6.3	19853880	0	1	45615.7	3		3.3	22.12	5.47	5	45	8891020	1092.26	11.8887	129.855	5	45	1180768	6558.28	9.86809	647.177	5	30	18779	73319.6	7.90472	5795.71
2015	ND	North Dakota	2015_ND	58694.5	2.8	755537	1	0	77685.8	1	1.9				3	23	371501	1090.74	9.62243	104.956	3	22	71210	7347.83	8.83332	649.058	3	22	8158	71377.2	8.06721	5758.15
2016	ND	North Dakota	2016_ND	54756	3.1	756114	1	0	72417.7	2		1.55	9.41		3	24	377739	1045.98	10.1607	106.279	3	22	73573	7188.05	9.14627	657.439	3	23	8634	71739	7.98186	5726.11
2014	IA	Iowa	2014_IA	180310	4.2	3110643	0	0	57965.5	1			21.66		3	92	1348641	891.427	11.1602	99.4851	3	90	224187	4586.61	8.67421	397.852	3	70	7399	230168	5.71	13142.6
2014	ID	Idaho	2014_ID	66784.9	4.8	1632248	0	1	40915.9	0					3	17	690277	982.083	9.72474	95.505	3	16	104463	4888.42	7.77559	380.104	3	14	27127	27557	6.39753	1762.97
2014	IL	Illinois	2014_IL	811490	7.1	12885092	0	1	62979	4	1.46	1.99	22.36	6.02	4	37	5145022	745.21	11.913	88.7772	4	36	600246	7027.6	9.26108	650.832	4	29	6098	605795	6.85149	41506
2017	ND	North Dakota	2017_ND	56530.2	2.7	756755	1	0	74700.8	1	1.83				3	23	380101	1062.94	10.2902	109.379	3	22	74527	7301.5	9.19215	671.165	3	23	8708	83852.1	7.63257	6400.07
2014	KS	Kansas	2014_KS	154110	4.5	2901861	0	0	53107.3	0					4	66	1228858	928.026	12.1709	112.949	4	67	226043	5671.02	10.1296	574.452	4	59	26787	35757.1	7.79988	2789.01
2018	ND	North Dakota	2018_ND	58516.4	2.6	760062	1	0	76989	3		1.55	1.55	2.83	3	24	382596	1118	10.25	114.6	3	22	75148	7580.5	9.09538	689.476	3	23	8985	80694	7.98	6441.06
2019	ND	North Dakota	2019_ND	59142.3		763724	1	0	77439.4	2	1.83		14.49		3	33	385038	1109	10.3	114.27	3	32	76355	7678	9.01	691.77	3	25	8803	88973.4	7.94439	7068.39
2014	MA	Massachusetts	2014_MA	496251	5.7	6764864	0	1	73357.1	2		4.27	4.27		5	30	2720128	614.896	17.391	106.936	5	30	398717	5450.02	14.6764	799.868	5	30	14896	44536.2	12.7405	5674.13
2014	MD	Maryland	2014_MD	370344	5.8	5960064	0	2	62137.6	2			0.72	5.1	4	9	2234962	1024.91	13.6284	139.679	4	9	248362	10000.3	11.1547	1115.5	4	6	8780	36522	9.03577	3300.04
2014	ME	Maine	2014_ME	59589.8	5.6	1331217	0	0	44763.4	4	6.97	4.27	4.27	6.51	1	4	706952	549.378	15.273	83.9064	1	4	91541	3627.31	12.7027	460.765	1	2	3023	92553.9	8.94751	8281.27
2014	MI	Michigan	2014_MI	479535	7.2	9932033	0	0	48281.6	3		2.6	2.6	6.57	8	40	4273126	653.6	14.4607	94.515	8	39	522422	5957.66	10.8705	647.63	8	29	13289	203464	7.67774	15621.4
2014	MN	Minnesota	2014_MN	338624	4.2	5452665	0	0	62102.5	3		1.95	1.95	5.82	5	113	2345860	809.634	12.0128	97.2598	5	112	284978	6675.32	9.85212	657.661	4	94	9898	194285	6.72416	13064
2014	MO	Missouri	2014_MO	303618	6.1	6059130	0	0	50109.1	3	2.03	2	2		4	73	2724541	1094.76	10.6385	116.466	4	73	371495	6878.79	8.89835	612.099	4	58	10282	141013	6.35803	8965.65
2020	ND	North Dakota	2020_ND	55699.1			1	0		0					1	1	387506	1085.26	10.4363	113.261	3	17	76834	7203.52	9.01826	649.632	3	18	8933	94511	7.26262	6863.97
2006	NE	Nebraska	2006_NE	97322.8	3.1	1772693	1	0	54901.1	2	0.87		15.34		0	160	782903	989.214	7.41186	73.3192	0	155	149186	5030.36	6.19381	311.571	0	96	38541	19410.7	4.55583	884.318
2007	SC	South Carolina	2007_SC	193387	5.7	4444110	0	0	43515.3	2			15.87	7.86	4	47	2035713	1210	9.18662	111.2	4	47	337586	5368	7.74444	415.73	4	35	4657	548143	4.82904	26470
2007	NE	Nebraska	2007_NE	99780.7	3	1783440	1	0	55948.4	2	1.02		16.69		0	159	790165	1028	7.5916	78.04	0	153	151342	5174	6.39083	330.66	0	96	39099	19405	4.77605	926.77
2008	NE	Nebraska	2008_NE	99860.1	3.3	1796378	1	0	55589.7	2	0.98		21.2		0	158	794548	1023	7.8691	80.46	0	153	152907	5144	6.6847	343.84	0	96	40777	19668	5.15777	1014.42
2009	NE	Nebraska	2009_NE	99986.4	4.6	1812683	1	0	55159.3	2	1.17		13.66		0	158	799623	1003	8.52	85.49	0	154	154061	5038	7.33	369.34	0	97	41391	19149	5.75	1101.53
2014	NJ	New Jersey	2014_NJ	570696	6.8	8867277	0	1	64359.8	3	2.63	3.95	23.67		4	8	3470874	669.682	15.7756	105.646	4	8	511335	6218.05	13.1457	817.408	4	6	12313	50871.8	11.3849	5791.69
2010	NE	Nebraska	2010_NE	109734	4.6	1829591	1	0	59977.4	3	1.25	1.42	1.42		1	158	801101	1051	8.94	93.97	1	154	154015	5158	7.63	393.79	1	97	45032	18895	6	1134.36
2011	NE	Nebraska	2011_NE	109734	4.4	1840914	1	0	59608.5	4	1.42	1.51	22.77	5.69	1	158	805671	1029	9.32	95.92	1	154	148927	5114	7.99	408.39	1	101	51373	17178	6.43	1104.7
2014	NY	New York	2014_NY	1.53538e+06	6.3	19653431	0	1	78122.5	4	3.85	3.03	23.67	5.27	8	21	7046829	590.986	20.0727	118.627	8	21	1045571	6100.4	16.1231	983.576	7	15	7862	190823	6.57811	12552.5
2014	OH	Ohio	2014_OH	624973	5.8	11606573	0	1	53846.5	1		2.16			6	58	4882159	901.315	12.4955	112.624	6	58	619293	6325.03	9.82519	621.447	7	51	19209	220510	6.76956	14927.5
2014	OK	Oklahoma	2014_OK	186574	4.5	3879187	0	0	48096.3	4	3.18	1.96	21.15	4.99	3	49	1710352	1137.74	10.0346	114.167	3	50	275276	6190.39	8.09004	500.805	3	44	18238	81210.7	5.84514	4746.88
2014	OR	Oregon	2014_OR	195808	6.8	3965447	0	1	49378.6	0					3	37	1669124	929.51	10.4671	97.2931	3	37	229832	5815.63	8.75151	508.955	3	34	23356	45150.7	5.96955	2695.29
2014	PA	Pennsylvania	2014_PA	718692	5.9	12792392	0	2	56181.2	3		2.51	23.67	4.84	11	25	5289211	853.866	13.3182	113.719	11	25	690549	5231.09	9.72505	508.726	10	24	24222	166232	7.41134	12320
2012	NE	Nebraska	2012_NE	109686	4	1853691	1	0	59171.8	4	1.47	1.55	22.96	3.85	1	81	806524	1000.19	10.0444	100.464	1	80	147463	5217.63	8.38164	437.323	1	71	54160	18332.9	7.00695	1284.58
2008	SC	South Carolina	2008_SC	192497	6.8	4528996	0	0	42503.3	2			18.2	10.12	4	47	2068598	1198	9.88652	118.4	4	47	342187	5279	8.42323	444.65	4	34	4691	519560	5.36698	27884.7
2013	NE	Nebraska	2013_NE	111382	3.8	1865813	1	0	59696.3	2		1.42	22.39		1	81	810867	1034.09	10.3137	106.654	1	81	148648	5262.47	8.60182	452.668	1	72	56365	16634.7	7.4425	1238.04
2014	NE	Nebraska	2014_NE	115652	3.3	1879955	1	0	61518.4	0					1	80	817425	1022.34	10.4009	106.332	1	81	151382	5243.65	8.72691	457.608	1	75	57429	15480.6	7.47114	1156.58
2015	NE	Nebraska	2015_NE	119641	3	1892059	1	0	63233.1	2	1.19		18.25		1	80	825940	961.746	10.6013	101.957	1	81	149820	5177.23	8.67472	449.11	1	74	60556	14662.9	7.59092	1113.05
2014	UT	Utah	2014_UT	150076	3.8	2938327	0	1	51075.4	1			20.61		1	26	1000416	746.687	10.6452	79.4862	1	27	117921	7811.2	8.53264	666.501	1	23	9658	85983.3	6.08137	5228.96
2014	VA	Virginia	2014_VA	488919	5.2	8315430	0	1	58796.6	1			22.19		3	28	3303676	1171.52	11.1001	130.039	3	28	422931	9408.87	8.152	767.011	3	23	3653	403800	6.89034	27823.2
2016	NE	Nebraska	2016_NE	121303	3.1	1906483	1	0	63626.6	3	1.19	1.35	1.35		1	81	834038	973.012	10.8396	105.47	1	81	149812	5176.95	8.79927	455.534	1	74	61613	15086.3	7.68943	1160.05
2014	WA	Washington	2014_WA	456186	6.1	7057531	0	1	64638.3	2	2.89			4.92	3	48	2907705	1005.46	8.66685	87.1416	3	48	359219	6736.91	7.96673	536.712	3	39	30308	77022.5	4.32408	3330.51
2017	NE	Nebraska	2017_NE	123220	2.9	1916998	1	0	64277.5	1	1.29				1	79	841965	956.888	10.9685	104.956	1	80	151485	5112.39	8.84626	452.255	1	73	62066	15303.1	7.66139	1172.43
2014	WV	West Virginia	2014_WV	74111.3	6.6	1850569	0	1	40047.8	2	2.47	2.4			5	6	862869	1158.03	9.33803	108.137	5	6	140698	4665.09	7.9918	372.825	4	4	12146	88019	5.8702	5166.9
2014	WY	Wyoming	2014_WY	39287.2	4.1	583159	0	0	67369.6	4	1.61	1.58	22.43	6.96	5	21	265720	863.162	10.4959	90.5964	5	23	58178	5729.96	8.88176	508.921	4	15	10323	83805.3	6.61021	5539.71
2018	NE	Nebraska	2018_NE	125543	2.8	1925512	1	0	65200	3	1.25	1.26	17.36		1	80	849898	1021	10.7	109.27	1	80	153749	5178.03	8.82732	457.081	1	74	61968	14758	7.6	1121.51
2019	NE	Nebraska	2019_NE	127482		1932571	1	0	65964.9	2		1.23	1.23		1	150	855619	1004	10.77	108.08	1	150	153814	5123	8.85	453.4	1	105	62204	14225.5	7.65292	1088.66
2020	NE	Nebraska	2020_NE	126891			1	0		4	1.16	1.24	12.32	2.36	1	1	864842	1013.19	10.7967	109.391	1	23	155282	4878.35	8.88852	433.613	1	23	62716	15368.7	7.38124	1134.4
2006	NH	New Hampshire	2006_NH	71424.5	3.4	1308389	1	0	54589.7	1			14.22		3	9	587882	623.793	14.6824	91.5875	3	9	100730	3774.57	14.0669	530.964	3	8	3183	55796.2	11.6171	6481.88
2015	CA	California	2015_CA	2.54598e+06	6.2	38904296	0	1	65442.1	0					6	42	13380684	556.688	16.9912	94.588	6	43	1685688	5852.41	15.7344	920.845	5	37	148069	29582	12.1653	3598.73
2007	NH	New Hampshire	2007_NH	71943.5	3.5	1312540	1	0	54812.4	1			15.76		3	9	592238	632	14.8784	94.06	3	9	101848	3739	13.9143	520.27	3	8	3230	56068	12.2682	6878.53
2015	CT	Connecticut	2015_CT	268870	5.7	3588561	0	1	74924.1	1			16.73		2	9	1468958	731.406	20.9364	153.13	2	10	152482	7082.02	15.9707	1131.05	2	9	4458	64154.4	12.9542	8310.68
2015	DC	District of Columbia	2015_DC	129110	6.9	677014	0	0	190705	0					1	1	247469	841.034	12.985	109.209	1	1	25439	26932.4	12.0062	3233.57	1	1	1	19852667	8.7845	1.74396e+06
2015	DE	Delaware	2015_DE	76211.2	4.9	942065	0	0	80898	3	2.78	2.93		2.63	1	10	413445	977.357	13.422	131.181	1	10	52786	6660.68	10.2527	682.9	1	7	858	236026	8.28087	19545
2015	FL	Florida	2015_FL	945929	5.5	20219111	0	1	46783.9	1				4.31	5	45	8963967	1141.23	11.5808	132.164	5	45	1183241	6750.32	9.50076	641.332	5	30	19457	72370.8	8.21508	5945.32
2008	NH	New Hampshire	2008_NH	71195.6	3.9	1315906	1	0	54103.9	2	4.4		21.43		3	9	594180	616	15.6845	96.66	3	9	102942	3657	14.3182	523.68	3	8	3431	50161	13.1737	6608.11
2009	NH	New Hampshire	2009_NH	70498.6	6.2	1316102	1	0	53566.2	1			13.32		3	9	591160	623	16.26	101.38	3	9	92630	3995	14.55	581.23	3	8	3197	47863	13.83	6619.43
2015	IA	Iowa	2015_IA	185989	3.8	3122541	0	0	59563.4	2	1.58	1.62			3	93	1356600	846.868	11.6344	98.5276	3	91	227544	4421.04	8.91939	394.33	3	70	7645	232060	5.89558	13681.3
2015	ID	Idaho	2015_ID	67790.5	4.2	1652495	0	1	41023.1	1	2.81				3	17	701447	956.914	9.92837	95.006	3	16	106451	4903.38	7.7997	382.449	3	13	27531	26456.5	6.59548	1744.93
2015	IL	Illinois	2015_IL	825425	6	12859585	0	1	64187.5	4	1.35	1.92	14.05	3.71	4	37	5172653	719.258	12.5009	89.9136	4	36	603187	6951.94	9.02324	627.29	4	29	5997	599337	6.66673	39956.2
2010	NH	New Hampshire	2010_NH	73465	5.8	1316807	1	0	55790.3	1			16.44		3	9	597411	626	16.32	102.11	3	9	104612	3555	14.26	506.84	3	8	3495	46308	12.75	5903.81
2015	KS	Kansas	2015_KS	158603	4.2	2910717	0	0	54489.2	1			12.07		4	66	1231830	895.8	12.344	110.577	4	67	228411	5611.35	10.0974	566.602	4	61	24155	38732.9	7.60826	2946.9
2011	NH	New Hampshire	2011_NH	73465	5.4	1320444	1	0	55636.6	3	3.03	3.55	3.55		3	9	599532	619	16.52	102.28	3	9	104610	3567	14.04	500.93	3	8	3491	46224	12.27	5669.84
2012	NH	New Hampshire	2012_NH	74082.8	5.5	1324677	1	0	55925.2	4	2.78	4.07	23.21	5.54	3	6	601697	614.818	16.0702	98.8022	3	5	104978	3555.05	13.3612	474.997	3	5	3444	47247.2	11.8323	5590.42
2015	MA	Massachusetts	2015_MA	514399	4.8	6797484	0	2	75674.9	4	3.65	3.47	3.47	4.21	5	29	2794918	601.548	19.8263	119.265	5	29	407063	5363.69	15.7853	846.673	5	29	14100	46644	13.5442	6317.53
2015	MD	Maryland	2015_MD	378746	5.1	5988528	0	2	63245.2	1			0.72		4	9	2255556	1012.44	13.819	139.909	4	9	249181	10019.2	11.0006	1102.17	4	6	8821	36686.3	8.52847	3128.78
2015	ME	Maine	2015_ME	60563	4.4	1329098	0	1	45567	3	5.39	3.47	3.47		2	7	699241	555.638	15.6129	86.7515	2	7	97057	3449.71	12.4731	430.286	2	6	2993	89320.8	9.05099	8084.41
2015	MI	Michigan	2015_MI	490619	5.4	9934483	0	0	49385.4	4	2.28	2.39	2.39	3.12	8	39	4282858	649.058	14.4218	93.606	8	38	532858	6011.72	10.5546	634.512	8	29	6041	423178	7.0237	29722.8
2015	MN	Minnesota	2015_MN	345456	3.7	5484002	0	0	62993.4	1			0.85		5	113	2374674	761.998	12.1154	92.3194	5	112	289044	6742.92	9.43656	636.3	4	94	9812	182201	7.02125	12792.8
2015	MO	Missouri	2015_MO	308010	5	6075411	0	0	50697.8	2		1.9	1.9		4	73	2734553	1033.43	11.2054	115.801	4	73	373622	6810.68	9.16157	623.965	4	59	10218	138940	6.43562	8941.64
2013	NH	New Hampshire	2013_NH	75503.4	5.1	1327272	1	0	56886.2	1			23.12		3	6	603628	628.681	16.3287	102.655	3	5	105461	3569.14	13.5208	482.578	3	5	3371	48762.5	11.3985	5558.17
2014	NH	New Hampshire	2014_NH	76836.2	4.3	1334257	1	0	57587.3	4	2.69	4.27	4.27	6.05	3	5	606883	619.352	17.5293	108.568	3	5	105840	3515.16	14.3391	504.041	3	5	3342	49098.9	11.9295	5857.27
2009	SC	South Carolina	2009_SC	184081	11.2	4589872	0	0	40106	2			13.36	4.01	4	47	2083432	1182	10.44	123.47	4	47	343793	5197	8.74	454.02	4	34	4501	470662	5.79	27251.1
2015	NH	New Hampshire	2015_NH	79319.3	3.4	1337480	1	0	59305	3		3.87	3.87	4.92	3	5	607465	621.016	18.5014	114.897	3	5	105833	3536.37	14.9647	529.208	3	5	3277	50377.1	12.7374	6416.71
2016	NH	New Hampshire	2016_NH	80736.1	2.9	1343694	1	0	60085.2	2		4.07	4.07		3	8	612716	603.652	18.3801	110.952	3	5	106900	3481.6	14.4334	502.512	3	5	3250	51291.2	12.3377	6328.15
2017	NH	New Hampshire	2017_NH	81179.6	2.7	1350395	1	0	60115.4	0					3	5	618356	598.563	19.2048	114.953	3	5	107436	3405	14.8057	504.133	3	5	3220	50619.2	12.3393	6246.05
2015	NJ	New Jersey	2015_NJ	581415	5.8	8870312	0	1	65546.2	2		3.82	14.7		4	8	3489111	696.029	15.8096	110.039	4	8	512894	6291.54	12.7893	804.647	4	6	12191	50039.6	10.6413	5324.86
2018	NH	New Hampshire	2018_NH	82269.5	2.5	1355064	1	0	60712.6	3		3.87	15.26	5.95	3	8	622671	621	19.69	122.27	3	5	107805	3434.1	15.8139	543.064	3	5	3176	51499	13.42	6910.18
2019	NH	New Hampshire	2019_NH	84031.2		1360783	1	0	61752.1	3	2.03		0.65	7.51	3	9	627257	599	20.05	120.04	3	9	108247	3296	15.93	525.13	3	8	3193	50213.3	13.0898	6572.81
2015	NY	New York	2015_NY	1.56584e+06	5.3	19657321	0	1	79656.6	2	2.72	2.83			8	21	7079097	600.509	18.5369	111.316	8	21	1055136	6081.81	15.305	930.823	7	15	7630	197457	6.30876	12457.1
2015	OH	Ohio	2015_OH	633275	4.9	11622315	0	1	54487.8	3		2.12	13.54	2.28	6	58	4892916	876.998	12.799	112.247	6	58	620810	6325.6	10.0653	636.693	7	51	19151	219991	7.01932	15441.9
2015	OK	Oklahoma	2015_OK	193793	4.4	3910518	0	0	49556.8	2	2.47			2.97	3	49	1723938	1093.22	10.1415	110.87	3	50	277386	6216.1	7.67512	477.093	3	43	18688	80396.8	5.34863	4300.12
2015	OR	Oregon	2015_OR	205582	5.6	4018542	0	1	51158.3	1				2.75	3	37	1686973	902.455	10.6646	96.2431	3	37	229116	5827.13	8.80358	512.996	3	34	25242	42752.1	5.96929	2551.99
2015	PA	Pennsylvania	2015_PA	734145	5.3	12789838	0	2	57400.7	1				2.42	11	25	5304279	854.949	13.6408	116.622	11	25	690881	5276.5	9.59923	506.503	10	24	23731	166464	7.19727	11980.9
2020	NH	New Hampshire	2020_NH	83182.1			1	0		1			0.62		1	1	633234	630.411	19.0375	120.015	3	4	109068	3078.9	15.4116	474.506	3	4	3180	49094.5	13.1123	6437.41
2010	SC	South Carolina	2010_SC	193221	11.2	4635846	0	0	41679.8	1				4.77	4	47	2089302	1310	10.5	137.59	4	47	340365	5465	8.9	486.35	4	34	4477	508284	5.74	29184.1
2006	NM	New Mexico	2006_NM	88554.5	4.2	1962137	1	0	45131.7	1			17.1		4	33	815799	613.859	9.05735	55.5994	4	33	130201	5506.68	7.61366	419.259	4	23	5497	103418	5.56908	5759.4
2007	NM	New Mexico	2007_NM	89392.3	3.8	1990070	1	0	44919.2	1			18.97		3	32	831081	640	9.11935	58.41	3	32	132379	5623	7.66484	430.96	3	24	5621	103013	5.59647	5765.08
2008	NM	New Mexico	2008_NM	89012.9	4.5	2010662	1	0	44270.4	1			23.53		3	31	841329	632	10.0097	63.24	3	32	133782	5499	8.66826	476.68	3	24	6456	88175	6.38393	5629.02
2015	UT	Utah	2015_UT	155432	3.6	2983626	0	1	52094.8	2	2.1			2.92	1	26	1021839	743.525	10.8835	80.9214	1	27	121310	7978.59	8.62313	688.004	1	22	9570	81896.4	6.16773	5051.15
2015	VA	Virginia	2015_VA	498944	4.5	8367303	0	1	59630.2	1		2.95			3	28	3332083	1148.64	11.3683	130.58	3	28	428369	9405.26	8.21052	772.221	3	23	3714	393492	6.94944	27345.5
2009	NM	New Mexico	2009_NM	90829.2	7.5	2036802	1	0	44594	1			15.26		3	31	844865	642	10.02	64.3	3	32	135702	5364	8.4	450.45	3	24	6837	78119	5.72	4467.17
2015	WA	Washington	2015_WA	476715	5.6	7167287	0	1	66512.7	0					3	48	2945760	963.871	9.09284	87.6432	3	48	365095	6680.11	8.21973	549.088	3	39	29163	76501.9	4.35118	3328.74
2010	NM	New Mexico	2010_NM	90552.3	8.1	2064614	1	0	43859.2	0					3	31	853811	659	10.52	69.35	3	32	135580	5541	8.57	474.87	3	25	7259	76458	6.01	4593.4
2015	WV	West Virginia	2015_WV	74261.4	6.7	1843332	0	1	40286.5	1		2.31			5	6	861334	1106.56	10.0839	111.585	5	6	141681	4588.21	8.61059	395.072	4	4	11949	91115.3	6.09133	5550.14
2015	WY	Wyoming	2015_WY	40063.9	4.3	586389	0	0	68323.1	1	1.65				5	21	268226	831.607	10.9656	91.1909	5	23	57686	5669.47	9.12196	517.167	4	15	10559	81474.5	6.75725	5505.43
2011	NM	New Mexico	2011_NM	90552.3	7.5	2080707	1	0	43520	3	2.66	2.05		4.84	3	31	856128	669	11	73.57	3	32	136678	5644	9.07	512.18	3	24	7603	75741	6.06	4591.04
2012	NM	New Mexico	2012_NM	90762.4	7.1	2087715	1	0	43474.5	4	2.48	2.18	25.77	3.35	3	26	859281	655.957	11.375	74.6151	3	26	137413	5558.39	9.32456	518.295	3	21	8238	73331.1	5.83062	4275.66
2013	NM	New Mexico	2013_NM	90104	6.9	2092833	1	0	43053.6	3		2.31	24.42	4.23	3	26	865195	655.342	11.6831	76.5642	3	26	138801	5392.95	9.74076	525.314	3	22	8676	69910.1	6.35568	4443.26
2014	NM	New Mexico	2014_NM	92621.1	6.7	2090236	1	0	44311.3	2		3.78		4.77	3	25	869875	633.421	12.2813	77.7922	3	26	139873	5347.92	10.2703	549.247	3	22	9112	68836.9	6.61086	4550.71
2016	CA	California	2016_CA	2.62371e+06	5.5	39149186	0	1	67018.3	1	2.88				6	53	13445133	547.355	17.3928	95.2005	6	45	1692326	5750.21	15.0745	866.814	5	38	148549	28598.4	11.92	3408.93
2015	NM	New Mexico	2015_NM	93503.9	6.5	2090071	1	0	44737.2	1			15.53		3	25	871047	635.416	12.4692	79.2312	3	26	142031	5208.4	10.3043	536.689	3	23	9348	67525.9	6.33355	4276.79
2016	CT	Connecticut	2016_CT	268196	5.1	3579830	0	1	74918.7	3	2.02		9.76	3.58	2	18	1486741	710.558	20.0108	142.189	2	10	152182	6955.08	15.7501	1095.43	2	9	4408	63711.2	12.8111	8162.12
2016	DC	District of Columbia	2016_DC	132218	6.1	687576	0	1	192296	1				2.97	1	4	259392	803.768	12.2909	98.7906	1	1	25924	26900.7	11.7181	3152.26	1	1	1	16037833	8.80366	1.41192e+06
2016	DE	Delaware	2016_DE	71941.4	4.5	949989	0	1	75728.7	2		2.74	10.74		1	13	419234	946.787	13.4174	127.034	1	10	53366	6613.5	10.0701	665.986	1	7	873	215741	8.11401	17505.2
2016	FL	Florida	2016_FL	978990	4.8	20627237	0	1	47461	0					5	47	9149214	1123.23	10.9838	123.374	5	45	1199897	6635.79	8.90327	590.802	5	30	21162	65994.2	7.6879	5073.56
2016	NM	New Mexico	2016_NM	93043.5	6.6	2092555	1	0	44464.1	1			11.32		3	29	876921	631.234	12.0336	75.9605	3	26	141723	5177.87	9.74742	504.709	3	23	9325	67838.8	5.83911	3961.18
2017	NM	New Mexico	2017_NM	93210.1	5.9	2092844	1	0	44537.5	1				3.43	3	25	880867	614.66	12.879	79.1618	3	26	143326	5107.42	10.1923	520.562	3	23	9395	68547.7	6.15415	4218.53
2016	IA	Iowa	2016_IA	186730	3.6	3133210	0	1	59597	1		1.59			3	94	1358902	864.281	11.9375	103.174	3	90	235813	4343.6	9.16739	398.195	3	73	7724	237854	6.04845	14386.5
2016	ID	Idaho	2016_ID	70442.5	3.8	1684036	0	1	41829.6	0					3	18	714365	953.297	9.95466	94.8974	3	16	107551	4865.23	7.75717	377.404	3	14	27847	25771.2	6.54941	1687.86
2016	IL	Illinois	2016_IL	826405	5.8	12821709	0	2	64453.6	1		1.97			4	38	5231541	732.577	12.5352	91.8299	4	36	606954	6989.83	9.01928	630.432	4	29	6054	600591	6.50829	39088.2
2018	NM	New Mexico	2018_NM	96077	4.9	2093754	1	0	45887.4	3		2.48	19.37	2.44	3	30	889841	639	12.68	81.08	3	26	143874	5233.32	10.0218	524.474	3	23	9360	72889	5.84	4259.23
2016	KS	Kansas	2016_KS	164644	4	2912977	0	1	56520.8	0					4	68	1252846	898.57	13.059	117.344	4	68	232926	5683.99	10.472	595.228	4	62	23729	40083	7.4876	3001.25
2019	NM	New Mexico	2019_NM	100446		2099634	1	0	47839.9	1	2.24				3	31	895086	640	12.51	80.04	3	32	144960	5190	9.79	508.31	3	26	9456	79135.9	5.4804	4336.96
2020	NM	New Mexico	2020_NM	97511.9			1	0		0					1	1	905885	669.886	12.9362	86.6577	3	21	145459	4816.3	10.2752	494.884	3	19	9436	80261.7	5.57915	4477.92
2016	MA	Massachusetts	2016_MA	521663	3.9	6827280	0	2	76408.6	1			6.12		5	40	2740865	598.743	19.0011	113.768	5	30	402936	5363.51	15.6002	836.719	5	30	13675	45748.8	13.3762	6119.47
2016	MD	Maryland	2016_MD	391951	4.5	6007014	0	3	65248.9	1				2.82	4	17	2288301	994.802	14.2272	141.533	4	9	250939	9854.98	10.9921	1083.27	4	6	8822	36098	7.88673	2846.95
2016	ME	Maine	2016_ME	62037.1	3.8	1332348	0	1	46562.2	3		4.07	4.07	3.22	2	8	699321	546.462	15.8258	86.4822	2	7	97949	3391.64	12.0844	409.858	2	6	3028	79167.7	8.95916	7092.76
2016	MI	Michigan	2016_MI	500160	5	9954117	0	1	50246.5	3		2.25	2.25	2.71	8	40	4311008	667.734	15.2217	101.641	8	38	538677	6031.12	10.6366	641.504	8	29	6191	416390	6.91048	28774.5
2016	MN	Minnesota	2016_MN	350604	3.9	5525360	0	1	63453.5	1			11.34		4	113	2378681	763.861	12.6711	96.79	4	111	291569	6717.03	9.85581	662.018	3	93	9000	196452	7.37207	14482.6
2016	MO	Missouri	2016_MO	308423	4.6	6091384	0	1	50632.7	1			10.92		4	75	2751460	1040.51	11.2087	116.627	4	73	376711	6797.54	9.2609	629.513	4	61	10169	110739	7.12089	7885.6
2006	NV	Nevada	2006_NV	156298	4	2522658	1	0	61957.6	1			13.34		2	16	1022122	976.573	11.0788	108.192	2	18	143217	5222.48	10.121	528.566	2	13	3404	333543	8.02623	26771
2007	NV	Nevada	2007_NV	157734	4.5	2601072	1	0	60642	1			17.72		2	16	1047485	986	11.8175	116.49	2	18	149294	5220	10.092	526.82	2	13	3499	330873	8.28159	27401.5
2011	SC	South Carolina	2011_SC	193221	10.6	4672655	0	0	41351.4	1				4.26	4	47	2101585	1221	11.05	135.01	4	47	340193	5289	9.3	491.76	4	34	4459	525043	5.94	31188.3
2008	NV	Nevada	2008_NV	152746	6.7	2653630	1	0	57561	1			23.6		2	17	1054691	953	11.9291	113.68	2	18	152735	5076	10.0688	511.12	2	13	3608	319193	7.97863	25467.2
2009	NV	Nevada	2009_NV	140304	11.3	2684665	1	0	52261.4	1			14.13		2	17	1054927	938	12.86	120.66	2	18	153621	4855	10.64	516.7	2	13	3648	307133	7.97	24488.1
2010	NV	Nevada	2010_NV	144341	13.5	2702483	1	0	53410.6	1				5.58	2	17	1058519	914	12.36	113.03	2	18	154455	4839	9.78	473.52	2	13	3484	315244	7.37	23239.8
2016	NJ	New Jersey	2016_NJ	587050	5	8873584	0	2	66157	1				2.12	4	18	3510141	690.635	15.7224	108.585	4	8	514579	6262.79	12.2577	767.673	4	6	11929	50947.8	10.1615	5177.04
2011	NV	Nevada	2011_NV	144341	13	2713114	1	0	53201.3	0					2	17	1067944	897	11.61	104.1	2	18	155395	4824	9.05	436.76	2	14	3506	318976	6.65	21201.5
2012	NV	Nevada	2012_NV	142986	11.2	2744670	1	0	52095.9	0					2	12	1080583	934.89	11.8276	110.576	2	12	155927	4978.08	8.8299	439.56	2	10	3748	305373	6.48386	19800
2016	NY	New York	2016_NY	1.59057e+06	4.9	19636391	0	1	81001	2		2.37	10.23		8	32	7118901	595.027	17.575	104.576	8	22	1072896	5942.4	14.4486	858.596	7	15	7646	193012	6.0295	11637.6
2016	OH	Ohio	2016_OH	638158	5	11640060	0	1	54824.2	1				2.23	6	59	4911597	891.159	12.4728	111.152	6	58	623730	6378.6	9.97454	636.236	7	51	19095	219476	6.97649	15311.7
2016	OK	Oklahoma	2016_OK	190094	4.8	3928143	0	1	48392.7	1		1.91			3	49	1736819	1093.46	10.1957	111.486	3	48	278027	6203.15	7.66207	475.29	3	42	19096	78686.4	5.01804	3948.51
2016	OR	Oregon	2016_OR	214769	4.8	4093271	0	1	52468.9	0					3	41	1706622	906.92	10.6638	96.7122	3	37	231692	5776.52	8.90772	514.556	3	33	24628	42944.4	6.05411	2599.9
2016	PA	Pennsylvania	2016_PA	744847	5.4	12788468	0	2	58243.7	0					11	32	5335555	841.48	13.8649	116.67	11	25	696080	5211.98	9.21978	480.533	10	24	23372	168036	6.92216	11631.7
2013	NV	Nevada	2013_NV	144549	9.6	2776956	1	0	52053.1	2	3.93			4.27	2	13	1094770	924.276	11.8948	109.941	2	13	158355	4895.09	9.01453	441.269	2	11	3783	303079	6.51564	19747.5
2012	SC	South Carolina	2012_SC	195406	9.2	4719027	0	1	41408.1	4	2.03	3.97	23.15	3.62	4	41	2113144	1118.64	11.7678	131.64	4	40	342761	5166.56	9.62788	497.43	4	32	4392	534380	6.02056	32172.7
2014	NV	Nevada	2014_NV	145304	7.9	2818935	1	0	51545.6	2		2.48		5.1	2	12	1110535	894.203	12.9326	115.644	2	13	157984	4967.85	9.47144	470.527	2	11	3691	310049	7.11673	22065.4
2015	NV	Nevada	2015_NV	151056	6.8	2868531	1	0	52659.7	1		2.47			2	12	1126220	912.976	12.7576	116.474	2	13	160492	4991.94	9.25143	461.826	2	12	3682	318188	6.74756	21469.9
2016	NV	Nevada	2016_NV	156007	5.7	2919555	1	0	53435.3	0					2	19	1143667	924.799	11.4058	105.481	2	13	161594	5120.38	7.93492	406.298	2	12	3654	308229	5.87911	18121.1
2016	UT	Utah	2016_UT	162528	3.4	3044241	0	1	53388.7	1		1.94			1	28	1041823	749.54	11.0168	82.575	1	27	124540	7738.69	8.75457	677.488	1	23	9570	79998.2	6.3269	5061.41
2016	VA	Virginia	2016_VA	505108	4.1	8417651	0	1	60005.8	2		2.88		3.07	3	30	3362985	1119.69	11.3553	127.145	3	28	430877	9527.82	7.93439	755.975	3	23	3708	396620	6.55529	25999.6
2017	NV	Nevada	2017_NV	163199	5.1	2972097	1	0	54910.4	1				3.38	2	12	1263101	853.507	11.9852	102.294	2	13	163356	5674.09	7.96338	451.849	2	12	3447	304360	6.15343	18728.6
2016	WA	Washington	2016_WA	495725	5.3	7299961	0	1	67907.9	1			12.29		3	50	2985799	954.846	9.48412	90.5587	3	49	367847	6567.28	8.42881	553.544	3	40	29012	73758	4.43381	3270.29
2018	NV	Nevada	2018_NV	168638	4.6	3030725	1	0	55643	1				3.16	2	20	1183660	947	11.85	112.18	2	13	164982	6123.85	7.74199	474.108	2	12	3446	294986	6.1	18002.6
2016	WV	West Virginia	2016_WV	73513.3	6.1	1832435	0	1	40117.8	1			11.48		5	7	860375	1101.8	11.4447	126.098	5	6	142711	4569.65	9.35139	427.326	4	4	11704	91670.2	6.56914	6021.94
2016	WY	Wyoming	2016_WY	37853.5	5.3	585243	0	0	64680	1			11.49		5	22	269647	850.208	11.1337	94.6601	5	23	57434	5458.9	9.40007	513.14	4	15	10654	78542.3	6.92294	5437.44
2019	NV	Nevada	2019_NV	175771		3090771	1	0	56869.7	2			16.25	3.07	2	16	1204996	890	12	106.83	2	18	167628	5807	8.04	466.74	2	15	3265	317140	6.13918	19469.8
2020	NV	Nevada	2020_NV	165794			1	0		0					1	1	1226566	973.015	11.3423	110.362	2	11	169743	5883.28	7.44761	438.164	2	9	3316	299673	5.61271	16819.8
2006	RI	Rhode Island	2006_RI	57415.8	4.9	1063096	1	0	54008.1	1			14.06		2	3	427599	586.305	15.1153	88.6218	2	3	54897	5463.77	13.5081	738.049	1	2	2290	43353.4	12.5108	5423.87
2007	RI	Rhode Island	2007_RI	56230.5	5.2	1057315	1	0	53182.4	1			15.77		2	3	429504	608	14.0476	85.36	2	3	55660	5555	12.6704	703.82	1	2	2252	43334	12.0416	5218.07
2017	CA	California	2017_CA	2.74055e+06	4.8	39337785	0	1	69667.1	0					6	42	13548295	554.335	18.3092	101.494	6	46	1696071	5782.11	15.7647	911.53	5	37	147754	27425.9	12.7288	3490.99
2008	RI	Rhode Island	2008_RI	54977.1	7.8	1055003	1	0	52110.8	1			20.27		2	3	430152	589	17.448	102.85	2	3	55906	5516	15.3579	847.12	1	2	2048	43761	14.2028	6215.25
2017	CT	Connecticut	2017_CT	273875	4.7	3575324	0	1	76601.5	3		4.34	14.05	4.24	2	9	1495577	689.785	20.2918	139.97	2	10	152903	6722.9	16.0627	1079.88	2	9	4385	61642.2	13.1022	8076.52
2017	DC	District of Columbia	2017_DC	134299	6.1	697079	0	1	192659	0					1	1	267448	746.143	12.9357	96.5185	1	1	26111	25551.9	11.658	2978.85	1	1	1	15015250	8.22813	1235475
2017	DE	Delaware	2017_DE	69555.6	4.5	957942	0	1	72609.4	1		2.69			1	10	426071	911.937	13.3485	121.73	1	10	54105	6445.29	9.88833	637.331	1	7	854	222613	7.77571	17309.7
2017	FL	Florida	2017_FL	1.01487e+06	4.2	20977089	0	1	48379.8	1				4.2	5	44	9291707	1089.35	11.6066	126.436	5	44	1216939	6505.65	9.34869	608.193	5	29	21289	64986.4	7.82658	5086.21
2009	RI	Rhode Island	2009_RI	54481.5	11	1053646	1	0	51707.6	1			11.84		2	3	432102	566	15.6	88.35	2	3	56385	5455	13.67	745.38	1	2	2014	40974	12.25	5018.34
2010	RI	Rhode Island	2010_RI	56026.6	11.2	1053994	1	0	53156.5	1			16.5		2	3	430623	603	15.92	96.08	2	3	56664	5432	13.11	711.85	1	2	1975	40541	11.82	4790.96
2017	IA	Iowa	2017_IA	187125	3.1	3143734	0	1	59523.2	0					3	91	1375599	831.266	12.3367	102.551	3	88	237942	4249.99	9.4638	402.211	3	72	7747	248108	6.20724	15400.6
2017	ID	Idaho	2017_ID	72935.1	3.2	1719745	0	1	42410.4	0					3	17	727568	999.666	10.041	100.376	3	16	108965	4910.6	7.98417	392.07	3	13	28138	25602.6	6.66055	1705.28
2017	IL	Illinois	2017_IL	832827	4.9	12779893	0	2	65167	2	1.33			3.24	4	37	5264333	692.038	12.9511	89.6268	4	36	611670	6810.3	9.08742	618.881	4	29	5693	628999	6.47461	40725.2
2011	RI	Rhode Island	2011_RI	56026.6	11	1053829	1	0	53164.8	3	5.18		22.15	5.01	2	3	432430	603	14.33	86.44	2	3	57409	5313	12.37	657.14	1	2	1958	38979	11.27	4394.53
2017	KS	Kansas	2017_KS	166274	3.7	2910892	0	2	57121.2	1	1.52				4	66	1259226	861.205	13.3129	114.651	4	67	232078	5651.58	10.5939	598.723	4	61	24322	39522.1	7.54432	2981.67
2012	RI	Rhode Island	2012_RI	56487.4	10.4	1054893	1	0	53548	3	3.88		23.43	3.86	2	3	435448	597.348	14.4041	86.0423	2	3	57824	5245.61	11.8672	622.51	1	2	1927	39935.9	10.6767	4263.85
2013	RI	Rhode Island	2013_RI	57037.2	9.3	1055560	1	0	54035	2	5.8			5.66	2	3	438198	601.838	15.1994	91.4757	2	3	58317	5240.17	12.9175	676.902	1	2	1913	40203.5	11.822	4752.84
2017	MA	Massachusetts	2017_MA	530129	3.8	6863560	0	2	77238.3	2	3.06		0.76		5	30	2766154	582.572	20.0597	116.862	5	30	409715	5281.73	15.935	841.643	5	29	10358	55184.5	13.8834	7661.51
2017	MD	Maryland	2017_MD	399714	4.3	6028186	0	3	66307.6	1			0.71		4	9	2313189	939.69	13.9578	131.16	4	9	252966	9518.09	10.7519	1023.38	4	6	8754	36153.2	8.37041	3026.17
2017	ME	Maine	2017_ME	63000.6	3.4	1335743	0	1	47165.2	2	4.66			3.68	2	7	707792	546.127	15.9679	87.2051	2	7	99331	3285.97	12.1153	398.105	2	6	3100	71461.1	9.20405	6577.31
2017	MI	Michigan	2017_MI	505102	4.6	9976752	0	1	50627.8	3	2.04	2.17	2.17		7	38	4344321	632.576	15.3985	97.4071	7	37	542959	5882.17	11.0032	647.228	8	29	6196	411429	7.19424	29599.2
2017	MN	Minnesota	2017_MN	354722	3.4	5569283	0	1	63692.6	1				3.81	4	112	2403168	748.103	13.0435	97.5785	4	111	292859	6622.61	10.4786	693.956	3	93	8984	206672	7.37217	15236.2
2017	MO	Missouri	2017_MO	311274	3.8	6111382	0	2	50933.5	3		1.87	1.87	3.26	4	73	2771123	993.914	11.6304	115.596	4	73	381634	6589.42	9.47152	624.119	4	60	8191	134401	7.32795	9848.82
2014	RI	Rhode Island	2014_RI	57602.7	7.7	1056511	1	0	54521.6	0					2	3	438879	582.99	17.1679	100.087	2	3	58346	5224.12	14.5606	760.661	1	2	1884	39240.5	12.8626	5047.36
2015	RI	Rhode Island	2015_RI	58387.9	6	1056886	1	0	55245.2	2			16.73	3.62	2	3	440191	593.588	19.2896	114.501	2	3	58903	5241.4	15.7764	826.902	1	2	1853	35911.7	13.7585	4940.91
2013	SC	South Carolina	2013_SC	200147	7.6	4766469	0	1	41990.7	3	1.93		23.1	4.58	4	41	2135432	1124.38	11.9938	134.856	4	40	346026	5086.37	9.8772	502.391	4	32	4479	533404	6.00955	32055.2
2016	RI	Rhode Island	2016_RI	58630	5.2	1057816	1	0	55425.5	0					2	3	438507	585.616	18.6159	109.018	2	3	58907	5165.37	14.8766	768.434	1	2	1821	34976	13.4826	4715.66
2017	RI	Rhode Island	2017_RI	58771.6	4.4	1056554	1	0	55625.7	0					2	3	437124	577.309	18.3191	105.758	2	3	59447	5050.84	15.1967	767.559	1	2	1784	33901.7	14.565	4937.78
2018	RI	Rhode Island	2018_RI	58740.1	4.1	1059338	1	0	55449.8	2			15.87	4.09	2	8	442005	589	20.55	121.05	2	3	60128	5124.6	16.5806	849.691	1	2	1773	34528	15.39	5313.53
2017	NJ	New Jersey	2017_NJ	590087	4.6	8888147	0	2	66390.3	2		3.17	13.96		4	8	3536087	654.251	15.6477	102.375	4	8	517404	6115.69	12.2805	751.037	4	6	11773	51976.4	10.1167	5258.32
2019	RI	Rhode Island	2019_RI	59866.6		1058158	1	0	56576.2	0					1	3	444216	560	21.73	121.62	1	3	60672	5006	16.38	820.14	1	2	1758	32964.4	15.5895	5138.99
2020	RI	Rhode Island	2020_RI	58155.2			1	0		0					1	1	441573	594.092	22.0087	130.752	1	3	60057	4927.63	15.9427	785.599	1	2	1692	31259.5	15.7578	4925.79
2017	NY	New York	2017_NY	1.6248e+06	4.7	19593849	0	1	82924	3	2.48	2.35	13.96		8	22	7144413	572.484	18.0298	103.218	8	22	1089889	5760.03	14.7495	849.572	6	14	6997	212132	5.92482	12568.4
2017	OH	Ohio	2017_OH	652188	5	11665706	0	1	55906.4	2		1.92		2.9	6	57	4936471	840.606	12.6257	106.133	6	57	627167	6133.18	10.0523	616.527	7	51	18664	226151	6.9162	15641.1
2017	OK	Oklahoma	2017_OK	192539	4.2	3933602	0	2	48947.1	1				3.18	3	48	1751034	1039.27	10.6101	110.267	3	48	281267	6073.37	8.10702	492.369	3	42	18782	80554.4	5.42024	4366.24
2017	OR	Oregon	2017_OR	225534	4.1	4147294	0	1	54381.1	2	2.63			2.45	3	37	1725884	968.872	10.6574	103.256	3	37	233823	5905.73	8.85597	523.01	3	33	24383	45734.8	5.98466	2737.07
2017	PA	Pennsylvania	2017_PA	754318	4.9	12794679	0	2	58955.6	2		1.88		2.56	11	25	5356693	804.671	14.2274	114.483	11	25	698453	5085.35	8.9774	456.533	10	24	22726	175603	6.76926	11887
2006	SD	South Dakota	2006_SD	39961.6	3.1	783033	1	0	51034.4	2			15.46	8.65	6	69	353053	956.167	7.83304	74.8969	6	71	64084	5271.46	6.46706	340.908	5	39	2359	68943.9	4.83849	3335.84
2014	SC	South Carolina	2014_SC	206078	6.5	4826858	0	1	42694	2			22.6	4.91	4	40	2157091	1186.63	12.4505	147.741	4	40	349432	5164.47	10.2771	530.76	4	33	4566	533804	6.29086	33580.9
2007	SD	South Dakota	2007_SD	41646.2	2.8	791623	1	0	52608.6	2			17.01	7.63	6	69	358396	991	8.07332	79.98	6	72	64767	5380	6.61001	355.6	6	39	2956	60935	5.09107	3102.25
2008	SD	South Dakota	2008_SD	43278.5	3.1	799124	1	0	54157.4	2			19.79	7.28	6	70	363517	1010	8.27366	83.56	6	72	65007	5436	6.96759	378.74	6	40	2984	65016	5.30703	3450.4
2009	SD	South Dakota	2009_SD	44255.8	4.9	807067	1	0	54835.3	2			12.45	5.18	6	70	367206	1024	8.49	86.88	6	72	65971	5354	7.14	382.27	6	41	3052	61721	5.65	3488.08
2017	UT	Utah	2017_UT	172075	3.3	3103540	0	1	55444.8	3	2.17		14.9	3.33	1	26	1063292	745.388	10.9541	81.6505	1	27	127113	7695.99	8.645	665.318	1	24	9594	80632.3	6.1304	4943.09
2017	VA	Virginia	2017_VA	515167	3.7	8471011	0	1	60815.3	2			11.93	3.33	3	28	3398529	1078.47	11.5475	124.536	3	28	422256	9907.21	8.01392	793.956	3	23	3692	387523	6.51012	25228.2
2010	SD	South Dakota	2010_SD	47630.3	5	816193	1	0	58356.7	3		1.95	18.1	5.46	6	70	370566	1041	8.97	93.4	6	72	66278	5492	7.55	414.71	6	42	3290	59783	6.07	3626.03
2017	WA	Washington	2017_WA	527169	4.7	7427951	0	1	70971	2	2.3			3.37	3	48	3037674	1022.79	9.65755	98.7767	3	48	381028	6517.35	8.56823	558.421	3	39	27825	74449.2	4.60196	3426.12
2011	SD	South Dakota	2011_SD	47630.3	4.7	823740	1	0	57822	1		2.09			6	70	374260	1035	9.35	96.78	6	72	68775	5388	7.76	417.87	6	42	2905	74193	6.2	4598.82
2017	WV	West Virginia	2017_WV	75172.4	5.2	1818683	0	1	41333.4	2	2.23	2.2			5	6	858961	1025.8	11.6301	119.301	5	6	143951	4370.37	9.57604	418.509	4	4	11529	98202.5	6.64404	6524.62
2017	WY	Wyoming	2017_WY	37620.3	4.2	579994	0	0	64863.3	1			14.48		5	21	270576	853.849	11.3724	97.1027	5	23	57863	5418.09	9.69695	525.39	4	15	10931	78093	6.91722	5401.86
2012	SD	South Dakota	2012_SD	48653.9	4.3	833859	1	0	58347.9	1				3.45	6	48	378633	980.222	10.0674	98.6828	6	49	68880	5512.74	8.09651	446.339	6	33	2891	78515.8	6.57078	5159.1
2013	SD	South Dakota	2013_SD	48610.1	3.8	842751	1	0	57680.3	2		2		4.22	6	48	381081	1054.93	10.2579	108.213	6	49	69446	5594.09	8.51247	476.195	6	34	3535	64210.4	6.9662	4473.02
2014	SD	South Dakota	2014_SD	49640.9	3.4	849670	1	0	58423.7	1			22.7		6	47	384749	1045.57	10.4683	109.453	6	49	69703	5466.44	8.88871	485.895	6	35	3801	64786.3	6.98517	4525.43
2015	SD	South Dakota	2015_SD	50860.8	3.1	854663	1	0	59509.8	2	2.56	2.23			6	47	388374	980.868	11.0804	108.684	6	49	69872	5663.5	9.15558	518.526	5	34	3748	61855.6	7.36631	4556.47
2018	CA	California	2018_CA	2.85097e+06	4.2	39437463	0	1	72290.9	1			17.24		6	53	13591152	546	18.84	102.9	6	47	1714875	5626.58	16.3441	919.616	5	38	148743	27852	13.2	3675.86
2016	SD	South Dakota	2016_SD	51264.3	3	863693	1	0	59354.8	3		2.25	8.54	2.47	6	48	392187	981.403	11.466	112.528	6	48	70745	5534.02	9.58392	530.376	5	35	3851	60866.3	7.57038	4607.81
2018	CT	Connecticut	2018_CT	274583	4.1	3574561	0	1	76815.8	1	2.6				2	17	1503701	724	21.2	153.46	2	10	153824	6707.38	16.7593	1124.11	2	9	4308	62094	13.77	8549.9
2018	DC	District of Columbia	2018_DC	138057	5.6	704147	0	1	196062	0					1	4	274613	787	12.84	101.01	1	1	26336	26061.4	11.9685	3119.15	1	1	1	16055167	8.3	1331850
2018	DE	Delaware	2018_DE	70856.4	3.8	966985	0	1	73275.6	2		2.64		3.06	1	14	432449	977	12.53	122.43	1	10	54904	6590.81	9.6533	636.23	1	7	837	235024	7.95	18687.6
2018	FL	Florida	2018_FL	1.05043e+06	3.6	21254926	0	1	49420.7	2			16.43	4.38	5	49	9423022	1110	11.54	128.1	5	44	1229559	6524.38	9.18826	599.477	5	29	21373	66739	7.67	5116.1
2017	SD	South Dakota	2017_SD	51615.1	3.2	873732	1	0	59074.3	1	2.41				6	47	396564	977.751	11.768	115.062	6	48	71263	5522.58	9.73523	537.636	5	35	3892	62909.4	7.83677	4930.06
2018	SD	South Dakota	2018_SD	51937.8	3	879386	1	0	59061.4	3		1.87	17.17	2.82	6	48	400150	1045	11.59	121.16	6	48	72106	5666.71	9.62128	545.21	5	35	3997	61380	7.77	4771.26
2018	IA	Iowa	2018_IA	189245	2.5	3149900	0	1	60079.7	2		1.63	16.27		3	93	1385756	892	12.24	109.27	3	89	239722	4317.84	9.68489	418.178	3	74	7890	252985	6.45	16328.8
2018	ID	Idaho	2018_ID	77652.1	2.8	1752074	0	1	44320.1	1			18.21		3	18	743567	944	10.15	95.84	3	16	110797	4841.36	7.93137	383.986	3	13	28418	26066	6.47	1686.86
2018	IL	Illinois	2018_IL	851517	4.3	12724685	0	2	66918.5	1				3.37	4	40	5289573	744	12.77	94.98	4	36	616192	6865.13	9.12367	626.351	4	29	5717	643034	6.8	43713.8
2019	SD	South Dakota	2019_SD	52360.1		887127	1	0	59022.1	0					6	71	403717	1044	11.55	120.6	6	72	73549	5538	9.59	531.22	5	48	4089	59588	7.80816	4652.73
2018	KS	Kansas	2018_KS	169797	3.4	2912748	0	3	58294.4	2			16.5	3.22	4	67	1266044	934	13.35	124.68	4	67	234091	5755.86	10.6572	613.414	4	60	24186	40271	7.6	3059.17
2020	SD	South Dakota	2020_SD	52692.1			1	0		0					1	1	407532	1036.73	11.7457	121.771	6	21	74236	5272.01	9.6514	508.823	5	19	4109	59409.1	7.79046	4628.24
2006	TN	Tennessee	2006_TN	295668	5.2	6088766	1	0	48559.6	3	0.41		14	7	3	90	2613978	1301.21	7.75261	100.877	2	88	448593	5393.37	8.00161	431.556	2	85	2043	1.39017e+06	5.1658	71813.3
2018	MA	Massachusetts	2018_MA	549262	3.3	6885720	0	2	79768.3	0					4	38	2784243	607	21.61	131.2	4	29	408972	5288.15	17.1721	908.089	4	28	10503	53154	14.89	7915.19
2018	MD	Maryland	2018_MD	402481	3.9	6042153	0	3	66612.2	3		2.53	2.53	3.86	4	16	2332517	1005	13.3	133.68	4	9	254163	9687.85	10.4324	1010.68	4	6	8801	36645	8.23	3014.83
2018	ME	Maine	2018_ME	64806.3	3.4	1340123	0	1	48358.5	4	5.3	3.87	3.87	4.67	2	8	709848	572	16.84	96.33	2	7	96066	3857.8	12.5114	482.664	2	6	3064	82560	9.32	7694.78
2018	MI	Michigan	2018_MI	516843	4.1	9987286	0	1	51750.1	3	2.15		0.63	3.25	7	39	4365529	671	15.45	103.59	7	37	543261	5970.93	11.1477	665.624	8	29	5972	429867	7.1	30520
2018	MN	Minnesota	2018_MN	364800	2.9	5608762	0	1	65041	3		2.19	2.19	3.47	4	113	2420325	786	13.14	103.34	4	111	295855	6590.66	10.3819	684.236	3	93	9406	199056	7.53	14986.5
2018	MO	Missouri	2018_MO	314182	3.2	6125986	0	3	51286.8	3		1.8	1.8	3.3	4	75	2792459	1118	11.34	126.79	4	73	384493	6757.66	9.4014	635.315	4	61	8086	138014	7.22	9959.09
2007	TN	Tennessee	2007_TN	294820	4.7	6175727	1	0	47738.5	3	0.35		16.11	7.33	3	90	2658103	1344	7.84185	105.42	2	88	456863	5469	8.09066	442.51	2	85	2067	1364713	5.19397	70882.8
2008	TN	Tennessee	2008_TN	298527	6.6	6247411	1	0	47784.1	3	0.47		15.18	9.82	3	90	2685425	1302	8.91347	116.02	2	88	460419	5324	9.23918	491.93	2	85	2094	1305467	6.29015	82115.7
2015	SC	South Carolina	2015_SC	213212	6	4896006	0	1	43548.2	2	1.79			3.37	4	40	2185965	1145.92	12.57	144.042	4	40	357724	5107.99	10.2143	521.744	4	32	4290	569970	6.04606	34460.7
2009	TN	Tennessee	2009_TN	287309	10.5	6306019	1	0	45561	2			12.54	4.57	3	89	2678768	1248	9.32	116.35	2	87	454949	5122	9.61	491.97	2	84	2036	1087479	6.76	73543.3
2010	TN	Tennessee	2010_TN	301509	9.7	6355518	1	0	47440.5	3		2.64	17.04	4.94	3	89	2704054	1393	9.23	128.58	2	87	460404	5321	9.66	513.81	2	85	2027	1189345	6.58	78270.7
2011	TN	Tennessee	2011_TN	301509	9	6400298	1	0	47108.6	2			21.55	4.6	3	89	2708113	1325	9.98	132.26	2	87	463992	5213	10.27	535.22	2	84	2017	1183212	7.23	85528.1
2018	NJ	New Jersey	2018_NJ	606892	4.1	8891730	0	2	68253.6	3		3.51	15.58	3.07	4	17	3568044	690	15.41	106.28	4	8	521429	6202.04	12.2065	757.051	4	6	11877	51704	10.07	5205.67
2012	TN	Tennessee	2012_TN	311754	7.8	6455752	1	0	48290.9	0					3	90	2721099	1217.45	10.1012	122.977	2	88	466513	5028.47	10.3078	518.326	2	84	1957	1.21257e+06	7.07711	85814.8
2013	TN	Tennessee	2013_TN	318348	7.8	6496943	1	0	48999.6	4	1.79	2.39	22.64	3.76	3	90	2738547	1244.76	9.98165	124.247	2	88	469382	5960.78	9.99792	595.954	2	82	1191	1.57163e+06	6.29063	98865.3
2018	NY	New York	2018_NY	1.66519e+06	4.1	19544098	0	1	85201.5	1				3.76	8	31	7190906	604	18.52	111.93	8	22	1106650	5779.11	14.4999	837.965	6	14	6884	218826	6.02	13168.5
2018	OH	Ohio	2018_OH	656212	4.6	11680892	0	1	56178.2	2		1.77	16.35		6	59	4964855	914	12.56	114.8	6	58	630210	6240.19	10.1052	630.586	7	52	18715	228141	7.01	15993
2018	OK	Oklahoma	2018_OK	196030	3.4	3943488	0	2	49709.9	3		1.77	16.2	2.73	3	49	1764980	1139	10.3	117.28	3	49	282875	6253.98	8.06856	504.606	3	42	18700	85692	5.34	4578.09
2018	OR	Oregon	2018_OR	234308	4.2	4183538	0	1	56007.2	3		2.34	17.24	2.23	3	40	1750240	901	10.98	99	3	37	237942	5768.22	8.91189	514.057	3	33	24885	46618	5.86	2733.58
2018	PA	Pennsylvania	2018_PA	763855	4.3	12809107	0	2	59633.8	2	1.81	2.09			11	32	5390428	864	13.89	120.04	11	25	716936	5023.87	8.94069	449.169	10	24	11743	348828	6.84	23855.2
2014	TN	Tennessee	2014_TN	323880	6.6	6544617	1	0	49487.9	4	1.92	2.45	17.89	4.55	3	90	2756932	1285.8	10.3249	132.757	2	88	471794	5916.66	10.3792	614.103	2	84	1271	1.58553e+06	6.40428	101542
2016	SC	South Carolina	2016_SC	220559	5	4963031	0	1	44440.4	2			11.17	3.28	4	43	2209783	1154.55	12.6531	146.086	4	40	369409	5024.91	10.2759	516.355	4	32	4062	547493	6.0908	33346.7
2015	TN	Tennessee	2015_TN	335461	5.6	6595354	1	0	50863.2	3		2.39	12.4	2.72	3	90	2783058	1247.65	10.3003	128.512	2	89	476405	6119.02	10.1569	621.5	2	84	1245	1.53836e+06	6.17176	94944
2016	TN	Tennessee	2016_TN	343545	4.7	6651277	1	0	51651	3		2.23	10.47	2.59	3	90	2812287	1237.84	10.4122	128.886	2	89	480032	6152.18	10.1928	627.077	2	84	1193	1.64471e+06	5.6796	93412.8
2017	TN	Tennessee	2017_TN	355418	3.8	6714748	1	0	52930.9	3		2.28	12.28	3.04	3	90	2847696	1149.83	10.7234	123.302	2	89	484324	5803.14	10.5514	612.311	2	84	1167	1.72952e+06	5.83328	100888
2018	UT	Utah	2018_UT	182106	3.1	3155153	0	1	57717	2		2.02	19.21		1	28	1091162	742	10.41	77.25	1	27	130053	7742.89	8.22879	637.146	1	24	9666	80977	5.9	4775.94
2018	VA	Virginia	2018_VA	527768	3	8510920	0	1	62010.6	1		2.67			3	30	3431574	1165	11.73	136.59	3	28	431058	10104.6	8.31641	840.343	3	23	3709	398967	6.86	27368.1
2018	TN	Tennessee	2018_TN	362364	3.5	6778180	1	0	53460.3	4	1.53	2.16	16.21	3.17	3	90	2882992	1283	10.71	137.35	2	89	491567	6260.67	10.5113	658.076	2	84	1010	1782077	5.68	101294
2018	WA	Washington	2018_WA	561786	4.5	7526793	0	1	74638.1	1				2.94	3	50	3076868	957	9.75	93.34	3	48	384366	6373.35	8.71618	555.513	3	39	27284	77161	4.71	3638.13
2019	TN	Tennessee	2019_TN	370088		6830325	1	0	54183.1	4	1.47	2.14	14.27	2.85	3	89	2914916	1217	10.87	132.33	2	88	497497	6056	10.65	645.02	2	83	1016	1731014	5.67769	98281.6
2018	WV	West Virginia	2018_WV	77406.5	5.3	1805953	0	1	42861.9	2		2.09	16.62		5	7	859039	1133	11.18	126.7	5	6	144478	4484.21	9.24306	414.478	4	4	11515	102713	6.4	6570.8
2018	WY	Wyoming	2018_WY	37977.2	4.1	579054	0	0	65584.9	3		1.68	18.53	3.77	5	22	272427	841	11.29	94.9	5	23	58318	5368.86	9.57551	514.095	4	15	10940	78909	6.71	5292.54
2020	TN	Tennessee	2020_TN	366555			1	0		4	1.24	1.91	10.29	2.44	1	1	2930482	1168.32	10.7588	125.698	2	87	501589	5562.35	10.5598	587.374	2	82	1015	1.67806e+06	5.33278	89487.3
2006	TX	Texas	2006_TX	1.22515e+06	4.9	23359580	1	0	52447.3	1	1.49				5	177	9102596	1161.24	12.8564	149.293	5	190	1489895	6215.78	9.85377	612.489	5	118	139100	62718	7.81848	4903.6
2007	TX	Texas	2007_TX	1.28883e+06	4.3	23831983	1	0	54079.8	1	1.63				5	179	9166849	1136	12.3426	140.17	5	192	1413358	6518	9.86957	643.26	5	119	168586	53534	7.79199	4171.34
2008	TX	Texas	2008_TX	1.28719e+06	4.8	24309039	1	0	52951.1	1	1.88				5	189	9418077	1130	13.0367	147.32	5	201	1411826	6698	10.7457	719.72	5	119	161084	54737	8.79096	4811.87
2019	CA	California	2019_CA	2.96279e+06		39437610	0	1	75126.1	0					6	50	13707126	532	19.15	101.92	6	54	1718601	5541	16.67	923.82	5	43	147660	26980.7	13.3989	3615.13
2009	TX	Texas	2009_TX	1.28556e+06	7.6	24801761	1	0	51833.4	1	2.2				5	193	9484812	1140	12.38	141.2	6	204	1435073	6881	9.66	664.53	6	120	136221	59298	6.74	3997.04
2019	CT	Connecticut	2019_CT	274219		3566022	0	1	76897.8	3	1.99	3.35	16.64		2	9	1510966	689	21.87	150.71	2	10	151979	6666	16.75	1116.33	2	9	4204	60890.3	13.4353	8180.77
2019	DC	District of Columbia	2019_DC	138867		708253	0	1	196070	0					1	1	282277	752	12.98	97.62	1	1	26471	25035	12.26	3069.38	1	1	1	14969333	8.22459	1.23117e+06
2019	DE	Delaware	2019_DE	74597.4		976668	0	1	76379.5	1				2.57	1	11	439167	950	12.55	119.16	1	11	55802	6603	9.53	629.46	1	8	865	196900	7.70053	15162.4
2019	FL	Florida	2019_FL	1079271		21492056	0	2	50217.2	1		2.83			5	53	9565846	1108	11.7	129.65	5	53	1240902	6485	9.27	601.06	5	33	23579	58365.8	7.64981	4464.87
2010	TX	Texas	2010_TX	1.37017e+06	8.1	25241897	1	0	54281.8	1		1.84			5	193	9536778	1199	11.6	138.99	6	202	1459667	6935	9.19	637.32	6	116	127608	65144	6.44	4192.55
2011	TX	Texas	2011_TX	1.37017e+06	7.8	25645504	1	0	53427.5	3	2.74	1.87		4.27	6	198	9621481	1262	11.08	139.81	6	205	1363629	7835	8.83	691.5	6	117	99033	85938	6.24	5358.52
2019	IA	Iowa	2019_IA	188318		3159596	0	1	59602.1	0					3	181	1392979	867	12.46	108.04	3	175	241734	4244	9.99	424.12	3	110	8565	235831	6.59958	15563.9
2019	ID	Idaho	2019_ID	81261.3		1789060	0	1	45421.2	0					3	30	763841	949	9.89	93.83	3	28	112137	4787	7.67	367.03	3	23	28493	25876.2	6.08111	1573.56
2019	IL	Illinois	2019_IL	857985		12667017	0	2	67733.8	0					4	71	5314522	709	13.03	92.37	4	70	622802	6594	9.08	598.9	4	51	5737	628238	6.52426	40987.9
2012	TX	Texas	2012_TX	1.43835e+06	6.7	26084120	1	0	55142.9	4	2.23	1.88	23	2.93	6	155	9802110	1168.21	10.9799	128.269	6	155	1355155	8185.1	8.1566	667.626	6	89	92377	85264.1	5.5713	4750.32
2019	KS	Kansas	2019_KS	170352		2912635	0	3	58487.1	0					4	146	1274955	891	12.71	113.26	4	143	235236	5638	10.29	580.21	4	88	24230	39938.9	7.3466	2934.15
2013	TX	Texas	2013_TX	1.51181e+06	6.3	26479646	1	0	57093.2	0					6	151	9954303	1174.3	11.3537	133.327	6	155	1366825	8323.18	8.01727	667.292	6	93	95881	88623.6	5.80588	5145.38
2014	TX	Texas	2014_TX	1.55964e+06	5.1	26963092	1	0	57843.4	0					6	154	10138874	1158.08	11.8636	137.39	6	160	1432478	8111.36	8.16157	662.014	6	93	101641	89502.5	6.16259	5515.68
2019	MA	Massachusetts	2019_MA	566706		6894883	0	2	82192.3	0					4	44	2802099	574	21.92	125.89	4	44	410995	5137	16.8	862.83	4	39	11020	47956	14.7564	7076.57
2019	MD	Maryland	2019_MD	402346		6054954	0	3	66449.1	2	1.88		0.65		4	12	2352535	975	13.12	127.92	4	12	256165	9399	9.97	936.75	4	9	8935	34680.2	7.79963	2704.93
2019	ME	Maine	2019_ME	66351.2		1345770	0	1	49303.5	3	4.95	3.35	3.35		2	9	710869	562	17.89	100.53	2	8	99738	3466	12.83	444.6	2	7	2893	80364.3	9.22178	7411.02
2019	MI	Michigan	2019_MI	517845		9984795	0	1	51863.4	4	1.9	2.09	2.09	2.6	7	57	4384305	637	15.74	100.23	7	56	544690	5792	11.39	659.86	8	45	5726	434952	7.07372	30767.3
2019	MN	Minnesota	2019_MN	368689		5640053	0	1	65369.7	1			0.81		4	171	2446111	759	13.04	99.02	4	170	299995	6362	10.34	658.1	3	120	8998	201415	7.52686	15160.3
2019	MO	Missouri	2019_MO	320881		6140475	0	3	52256.7	0					4	126	2811863	1058	11.14	117.82	4	125	384787	6526	9.07	592.07	4	90	10096	107383	7.10868	7633.55
2015	TX	Texas	2015_TX	1.63413e+06	4.4	27468531	1	0	59490.9	1	2.23				5	156	10318006	1176.36	11.5607	135.996	5	166	1425780	7967.78	8.15359	649.66	5	95	105936	86673.6	5.59166	4846.5
2016	TX	Texas	2016_TX	1.63386e+06	4.6	27914064	1	0	58531.9	2	2.04	1.8			4	159	10521732	1156.12	10.994	127.105	4	163	1447247	8009.71	8.25551	661.242	4	95	105552	89531.5	5.32756	4769.85
2017	SC	South Carolina	2017_SC	224938	4.3	5027102	0	1	44745	1		3.3			4	40	2251558	1081.66	13.0172	140.801	4	40	373073	4860.1	10.5748	513.947	4	32	4379	515980	6.18672	31922.2
2017	TX	Texas	2017_TX	1667313	4.3	28291024	1	0	58934.3	0					4	158	10809494	1112	11.0137	122.472	4	165	1514712	7563.92	8.25704	624.555	4	96	114857	87043.1	5.35488	4661.05
2018	TX	Texas	2018_TX	1.74654e+06	3.9	28624564	1	0	61015.5	1	2.35				4	162	11148784	1176	11.2	131.63	4	168	1591150	7516.82	8.16212	613.532	4	95	125722	81893	5.39	4415.1
2019	TX	Texas	2019_TX	1.80291e+06		28986794	1	0	62197.7	4	2.01	1.99	14.41	2.34	4	203	11366639	1140	11.76	134.07	4	205	1537111	7699	8.06	620.21	4	115	232427	47209.8	5.4463	2571.19
2019	NJ	New Jersey	2019_NJ	617111		8891258	0	2	69406.5	2		3.07	14.06		4	12	3596834	663	15.85	105.07	4	12	523796	6048	12.23	739.88	4	6	11781	49444.5	10.1588	5022.98
2020	TX	Texas	2020_TX	1.77219e+06			1	0		4	1.88	2.04	10.73	2.1	1	1	11515333	1131.93	11.7137	132.591	4	143	1539553	7857.67	7.59875	597.085	4	86	264126	39472.1	5.06886	2000.78
2006	VT	Vermont	2006_VT	29420.9	3.7	622892	1	0	47232.7	0					4	21	306684	582.097	13.3914	77.951	4	21	48436	3487.58	11.6732	407.113	3	18	401	337842	8.32978	28141.5
2019	NY	New York	2019_NY	1.70975e+06		19463131	0	1	87845.6	0					8	59	7235400	577	17.94	103.6	8	59	1121107	5582	14.06	784.69	6	46	7607	192240	5.61322	10790.9
2019	OH	Ohio	2019_OH	674123		11696507	0	1	57634.6	1		1.79			6	113	4980931	874	12.38	108.15	6	113	632794	6059	9.72	588.65	7	100	19798	211508	6.55174	13857.4
2019	OK	Oklahoma	2019_OK	199462		3960676	0	2	50360.6	0					3	89	1777156	1116	10.21	113.93	3	87	285641	5860	7.98	467.79	3	58	19905	87515.6	5.06657	4434.04
2019	OR	Oregon	2019_OR	239910		4216116	0	1	56903.2	0					3	40	1763783	911	11.01	100.35	3	41	240488	5691	8.85	503.5	3	36	25169	48566	5.85563	2843.84
2019	PA	Pennsylvania	2019_PA	772530		12798883	0	2	60359.1	1	1.54				11	59	5418870	837	13.8	115.47	11	58	716992	4666	8.71	406.56	10	43	13788	304750	6.4064	19523.5
2007	VT	Vermont	2007_VT	29296.6	4	623481	1	0	46988.8	0					3	20	305328	592	14.1464	83.77	3	20	48940	3506	12.2897	430.87	3	18	403	338172	8.92075	30167.5
2018	SC	South Carolina	2018_SC	231663	3.4	5091702	0	1	45498.2	3		3.33	17.22	4.18	4	43	2290200	1159	12.44	144.2	4	40	376842	4916.48	10.1091	497.013	4	32	4573	504811	6.1	30794.6
2008	VT	Vermont	2008_VT	30168.6	4.7	624151	1	0	48335.4	0					3	20	306174	581	14.4759	84.06	3	20	49643	3429	12.4913	428.37	3	17	315	413966	9.19284	38055.2
2009	VT	Vermont	2009_VT	29565.7	6.6	624817	1	0	47319	2	0.57		12.53		3	20	306919	576	14.9	85.83	3	20	50081	3313	12.93	428.53	3	16	225	512404	9.21	47194.1
2010	VT	Vermont	2010_VT	31663.6	6.1	625886	1	0	50590	2	2.47		16.46		3	20	307839	576	15.57	89.71	3	20	50620	3327	13.44	447.01	3	16	219	550213	9.53	52454.8
2019	UT	Utah	2019_UT	192699		3203383	0	1	60154.7	0					1	49	1116145	727	10.4	75.63	1	50	132082	7483	8.26	617.98	1	39	10343	76467.5	5.97779	4571.07
2019	VA	Virginia	2019_VA	541070		8556642	0	1	63233.9	2			14.22	3.15	3	32	3464677	1122	12.07	135.46	3	32	434175	10361	8.18	847.81	3	25	3723	393908	6.85319	26995.3
2011	VT	Vermont	2011_VT	31663.6	5.5	627197	1	0	50484.3	1			22.15		3	20	308992	573	16.26	93.19	3	20	50796	3295	14	461.16	3	16	221	534353	9.83	52503.4
2019	WA	Washington	2019_WA	588930		7614024	0	1	77348.1	1				3.32	3	57	3126192	973	9.71	94.49	3	58	389147	6268	8.75	548.5	3	43	26829	78186.1	4.80438	3756.36
2012	VT	Vermont	2012_VT	31898.1	5	626361	1	0	50926.1	2	4.4			4.06	2	13	309019	565.036	17.0061	96.0905	2	12	51216	3244.25	14.3162	464.452	2	11	221	536044	9.97968	53495.5
2019	WV	West Virginia	2019_WV	76786.6		1795263	0	1	42771.8	1				2.19	5	9	857666	1084	11.25	121.9	5	9	145225	4342	9.16	397.92	4	5	11562	104701	6.0246	6307.82
2019	WY	Wyoming	2019_WY	38558.2		580116	0	0	66466.4	3	1.66		16.08	3.07	5	35	274881	864	11.18	96.53	5	33	58325	5109	9.64	492.52	4	23	11294	76284.2	6.72521	5130.27
2013	VT	Vermont	2013_VT	31494.6	4.4	626603	1	0	50262.4	2	5.32			5.53	1	12	311567	568.669	17.1374	97.4548	1	11	51788	3245.37	14.6613	475.814	1	10	223	540275	10.8421	58577.4
2014	VT	Vermont	2014_VT	31847.7	3.9	625693	1	0	50899.9	0					1	11	310932	568.545	17.4735	99.3445	1	11	52453	3225.94	14.5627	469.782	1	10	224	527528	10.2335	53984.7
2015	VT	Vermont	2015_VT	32042.9	3.6	625810	1	0	51202.3	2	9.35		16.73		1	11	312060	557.836	17.0893	95.3305	1	11	53610	3125.3	14.5404	454.431	1	10	231	512843	10.2716	52677.4
2016	VT	Vermont	2016_VT	32312.7	3.2	624366	1	0	51752.8	0					1	15	312239	548.832	17.3667	95.3138	1	11	55601	3018.6	14.5412	438.942	1	10	230	523914	10.2265	53577.9
2020	CA	California	2020_CA	2.92515e+06			0	1		3	2.74		13.73	3.26	1	1	13834719	571.838	20.4492	116.936	6	33	1725533	5167.79	17.5292	905.875	5	28	148130	26795.7	14.2706	3823.9
2017	VT	Vermont	2017_VT	32589.2	3	625132	1	0	52131.7	3	8.19		14.05	3.47	1	10	313670	537.567	17.675	95.0152	1	10	56389	3616.44	12.5375	453.411	1	9	187	634422	10.2149	64805.7
2020	CT	Connecticut	2020_CT	258625			0	1		4	1.53	3.11	9.58	2.41	1	1	1521112	711.203	22.7147	161.547	2	6	154894	5996.52	16.5831	994.409	2	6	4130	57713.7	13.0699	7543.1
2020	DC	District of Columbia	2020_DC	137762			0	1		0					1	1	290466	703.636	12.6332	88.8918	1	1	26672	21291.2	11.8534	2523.74	1	1	1	15528667	7.98588	1240100
2020	DE	Delaware	2020_DE	72550.3			0	1		0					1	1	446276	931.997	12.5629	117.086	1	6	56764	5993.38	9.18252	550.343	1	5	878	195085	6.70344	13077.4
2020	FL	Florida	2020_FL	1.06838e+06			0	2		0					1	1	9731237	1141.5	11.269	128.636	5	37	1256569	6134.01	8.84526	542.57	5	27	22587	61144.9	7.1546	4374.67
2018	VT	Vermont	2018_VT	32827.8	2.7	624802	1	0	52541.1	0					1	15	315138	560	18.02	100.83	1	10	57037	2927.22	15.2401	446.11	1	9	204	576547	10.66	61431.9
2019	VT	Vermont	2019_VT	33207.6		624046	1	0	53213.4	0					1	17	316180	549	17.71	97.18	1	17	58320	2764	15.98	441.78	1	14	242	486107	11.0459	53694.7
2020	IA	Iowa	2020_IA	187137			0	1		0					1	1	1403386	865.02	12.4594	107.777	3	22	243762	3967.58	9.9579	395.088	3	21	9507	214462	6.42678	13783
2020	ID	Idaho	2020_ID	82818.6			0	1		0					1	1	782559	955.28	9.9487	95.0379	3	13	114707	4584.09	7.74899	355.221	3	11	28759	26602.3	6.2298	1657.27
2020	IL	Illinois	2020_IL	810210			0	2		1		1.61			1	1	5339610	720.567	13.0429	93.9826	4	24	628868	6027.57	9.1468	551.33	4	22	5561	604840	6.697	40506.1
2020	VT	Vermont	2020_VT	32307.1			1	0		0					1	1	316948	567.128	19.5352	110.79	1	4	59554	2526.75	16.3874	414.069	1	4	252	452619	11.2001	50693.7
2020	KS	Kansas	2020_KS	168541			0	3		0					1	1	1282532	883.178	12.8533	113.517	4	21	236430	5231.75	10.404	544.312	4	22	23979	38395.3	7.29802	2802.1
2006	WI	Wisconsin	2006_WI	287147	4.7	5577655	1	0	51481.6	1	1.47				12	118	2550249	711.678	10.5088	74.7891	12	118	323822	5856.01	8.3714	490.23	12	90	6921	304455	5.85437	17823.9
2007	WI	Wisconsin	2007_WI	289855	4.9	5610775	1	0	51660.5	1	1.67				12	118	2572557	725	10.8653	78.75	12	118	329915	5934	8.71494	517.11	12	89	7040	301091	6.16114	18550.7
2020	MA	Massachusetts	2020_MA	556196			0	2		0					1	1	2817549	601.74	21.9657	132.176	4	21	411448	4682.75	16.0331	750.789	4	20	10877	47657	14.5063	6913.25
2020	MD	Maryland	2020_MD	388532			0	3		0					1	1	2376983	957.319	13.0053	124.502	4	9	256738	8585.88	9.72389	834.882	4	6	8966	31432.6	7.80955	2454.74
2020	ME	Maine	2020_ME	67420.6			0	1		3		3.11	3.11	3.22	1	1	717559	569.67	16.8118	95.772	2	5	97575	3258.74	12.5644	409.44	2	5	2681	81618.3	8.86465	7235.17
2020	MI	Michigan	2020_MI	502484			0	1		2			0.51	2.03	1	1	4423595	675.599	16.2604	109.855	7	30	546115	5415.65	11.7114	634.249	7	21	5580	383125	7.24303	27749.9
2020	MN	Minnesota	2020_MN	358127			0	1		0					1	1	2464753	775.455	13.1683	102.114	4	44	303702	5906.74	10.4273	615.916	3	40	9042	180379	7.6722	13839
2020	MO	Missouri	2020_MO	315276			0	3		3	1.55		9.19	2.23	1	1	2833918	1027.74	11.2232	115.346	4	45	387872	6000.92	8.93322	536.075	4	38	10108	105723	6.84196	7233.56
2008	WI	Wisconsin	2008_WI	286205	4.9	5640996	1	0	50736.6	1	1.94				12	118	2579776	710	11.5109	81.71	12	118	333653	5863	9.27504	543.77	12	90	4683	439040	6.51032	28582.9
2009	WI	Wisconsin	2009_WI	277279	8.6	5669264	1	0	48909.2	1	1.99				12	118	2589296	689	11.94	82.28	12	118	336725	5562	9.57	532.08	12	90	4507	413977	6.73	27880
2019	SC	South Carolina	2019_SC	237511		5157702	0	1	46049.8	1				3.18	4	47	2330903	1114	12.99	144.73	4	47	385285	4795	10.58	507.11	4	34	3703	604855	6.11321	36976
2010	WI	Wisconsin	2010_WI	293664	8.7	5690538	1	0	51605.7	2	2.02	2.11			12	118	2594698	716	12.65	90.59	12	118	338406	5664	9.98	565.49	12	88	4496	434679	6.85	29771.5
2011	WI	Wisconsin	2011_WI	293664	7.8	5705840	1	0	51467.3	0					12	118	2601879	709	13.02	92.39	12	118	340623	5640	10.42	587.89	12	86	4527	430872	7.33	31570.2
2012	WI	Wisconsin	2012_WI	299008	7	5720825	1	0	52266.5	0					12	86	2609168	703.492	13.1906	92.7947	12	85	341896	5662.74	10.5105	595.184	12	64	4572	429442	7.34492	31542.2
2020	NJ	New Jersey	2020_NJ	595973			0	2		1				1.79	1	1	3618587	683.436	16.0285	109.544	4	5	526725	5587.3	12.3478	689.91	4	5	11629	48265.7	10.0075	4830.17
2013	WI	Wisconsin	2013_WI	301550	6.7	5738012	1	0	52553.1	2	2.25			4.39	12	86	2619676	702.883	13.5459	95.2121	12	85	341657	5770.5	10.745	620.038	12	64	4725	412165	7.4012	30505.1
2014	WI	Wisconsin	2014_WI	309426	5.4	5753199	1	0	53783.3	1			21.47		12	85	2631430	694.354	13.665	94.8835	12	85	345907	5723.48	10.7691	616.369	12	63	5465	363092	7.51982	27303.8
2020	NY	New York	2020_NY	1.65057e+06			0	1		1		2.09			1	1	7239162	601.556	18.3646	110.473	8	15	1143347	5028.28	14.5602	732.125	7	12	7535	183703	5.54445	10185.3
2020	OH	Ohio	2020_OH	654586			0	1		0					1	1	5014959	873.267	12.287	107.298	6	38	636519	5656.31	9.52719	538.887	7	38	19746	197607	6.15949	12171.6
2020	OK	Oklahoma	2020_OK	190752			0	2		0					1	1	1795629	1078.2	10.1157	109.067	3	34	290192	5369.72	7.82423	420.139	3	30	20468	82925.6	4.60996	3822.84
2020	OR	Oregon	2020_OR	237670			0	1		0					1	1	1785131	916.273	11.167	102.321	3	24	239645	5476.47	9.00337	493.067	3	23	26353	49383.3	5.69619	2812.97
2020	PA	Pennsylvania	2020_PA	736471			0	2		0					1	1	5448109	845.968	13.5823	114.902	11	21	720919	4089.8	8.49721	347.519	10	20	15462	261972	6.16028	16138.2
2015	WI	Wisconsin	2015_WI	315688	4.6	5762927	1	0	54779.1	2		2.27		3.17	12	85	2647224	667.831	14.1146	94.2617	12	85	347456	5639.59	10.8948	614.42	12	63	5529	361275	7.57652	27372.1
2020	SC	South Carolina	2020_SC	233712			0	1		0					1	1	2377020	1080.7	12.7843	138.159	4	31	395288	4392.23	10.351	454.64	4	27	3714	562664	5.97869	33639.9
2016	WI	Wisconsin	2016_WI	319272	4	5775170	1	0	55283.6	1				2.77	12	86	2662284	682.817	14.0707	96.077	12	85	349324	5697.69	10.7705	613.668	12	64	5537	361776	7.49498	27115
2017	WI	Wisconsin	2017_WI	321887	3.3	5793147	1	0	55563.4	4	2.17	2.22	12.68	3.2	12	85	2681341	659.905	14.3454	94.6657	12	85	351707	5601.52	10.8744	609.132	12	62	5666	355992	7.49246	26672.6
2018	WI	Wisconsin	2018_WI	328832	3	5809319	1	0	56604.3	2	2.22			3.22	12	86	2700651	693	14.02	97.09	12	85	354639	5662.08	10.6729	604.306	12	63	5789	351595	7.33	25776.9
2020	UT	Utah	2020_UT	194754			0	1		0					1	1	1143136	768.849	10.4362	80.2385	1	19	135113	7028.09	8.27129	581.313	1	17	11001	73267	5.90347	4325.29
2020	VA	Virginia	2020_VA	533828			0	1		0					1	1	3506844	1095.21	12.0267	131.717	3	20	437477	10196.1	7.63297	778.267	3	19	3693	394310	6.27637	24748.4
2019	WI	Wisconsin	2019_WI	333699		5824581	1	0	57291.4	2	2.08	2.22			12	117	2720287	674	14.18	95.52	12	117	356561	5503	10.72	590.14	12	84	5522	356375	7.31342	26063.2
2020	WA	Washington	2020_WA	590401			0	1		1				2.86	1	1	3168238	969.487	9.87364	95.7236	3	38	389802	5837.88	8.92231	520.874	3	34	26741	69936.9	5.08079	3553.35
2020	WI	Wisconsin	2020_WI	322973			1	0		1			9.12		1	1	2742424	694.238	14.3205	99.4181	12	66	360316	5189.03	10.7546	558.059	12	49	5621	328595	7.28942	23952.7
2020	WV	West Virginia	2020_WV	73952.9			0	1		0					1	1	862279	1051.24	11.804	124.087	5	5	146769	3949.43	9.40268	371.352	4	4	11444	103717	6.09372	6320.22
2020	WY	Wyoming	2020_WY	36181.3			0	0		1				2.28	1	1	276029	869.331	11.1108	96.5901	5	13	57958	4773.61	9.65367	460.828	4	9	11334	67139.2	6.87846	4618.14

## Sheet: Imputed main data
Year	STATE	State_NA	State_Code	Real_GSP_2017_$M	State_UR	Population	Any_merger?	IOU_Merger	GSP_Per_Capita	Coal_Cost_US	Fuel_Cost_US	Gas_Cost_US	Nuclear_Cost_US	Dummy_State_RTO	Cost_Primary_MBTU	Cost_Coal_MBTU	Cost_FuelOil_MBTU	Cost_NaturalGas_MBTU	Cost_Nuclear_MBTU	Usage_Coal_MBTU	Usage_FuelOil_MBTU	Usage_NaturalGas_MBTU	Usage_Nuclear_MBTU	IOU_Res	Mark_Res	Cust_Res	KWH_res	CPKWH_res	Bill_res	IOU_Com	Mark_Com	Cust_com	KWH_com	CPKWH_com	Bill_com	IOU_Indus	Mark_Indus	Cust_indus	KWH_indus	CPKWH_indus	Bill_indus
2006	AK	Alaska	2006_AK	47546.2	6.6	675302	1	0	70407.3	41.9669	2.137	6.73	18.61	0		2.24655	14.1311	7.16101	0.470406					19	71	261502	675.665	14.8274	100.183	20	71	45690	5141.92	11.9272	613.289	5	23	1383	74887.1	11.5408	8642.56
2007	AK	Alaska	2007_AK	50126.7	6.3	680300	1	0	73683.2	41.9669	2.286	6.97	32.78	0		2.24655	15.0977	7.38155	0.58103					19	71	265449	664	15.1799	100.76	20	72	46047	5119	12.1869	623.81	5	22	1349	85481	12.6325	10798.4
2008	AK	Alaska	2008_AK	49926.6	6.7	687455	1	0	72625.3	40.69	2.983	8.86	45.88	0		2.22047	19.6192	9.11825	0.683301					17	69	268638	661	16.5483	109.31	18	71	47032	5052	13.6354	688.85	4	22	1350	82985	14.1731	11761.5
2009	AK	Alaska	2009_AK	54951.9	7.7	698895	1	0	78626.8	43.33	2.141	3.94	45.86	0		2.2744	14.1571	4.5973	0.683145					16	69	269669	654	17.14	112.13	18	71	47337	5002	14.46	723.13	4	23	1367	79946	13.15	10510.5
2010	AK	Alaska	2010_AK	54045.5	7.9	713982	1	0	75695.9	44.27	2.705	4.37	49.29	0		2.2936	17.8158	4.99242	0.709922					17	70	271956	641	16.26	104.29	18	71	47844	4929	13.95	687.36	3	19	1350	81734	14.14	11561.1
2011	AK	Alaska	2011_AK	54045.5	7.6	722349	1	0	74819.1	45.02	3.467	4	55.64	0	6.17	1.73	22.7589	4.97	0.759496	5976		42344		15	69	273855	649	17.62	114.42	17	71	48503	4904	15.1	740.4	2	18	1250	88714	15.71	13935.6
2012	AK	Alaska	2012_AK	57087.4	7.1	730810	1	0	78115.2	45.77	3.58	2.75	54.99	0	6.07	1.81	27.04	4.27	0.754422	6301	2943	40266		3	23	275405	653.642	17.8828	116.89	4	23	48790	4910.57	14.9268	732.992	1	11	1263	91130.7	16.8208	15328.9
2013	AK	Alaska	2013_AK	54627.6	7	737626	1	0	74058.7	45.02	3.483	3.73	51.99	0		2.30892	22.8627	4.40433	0.731001					3	23	277275	632.334	18.1172	114.562	4	23	49182	4785.29	15.5799	745.543	1	11	1314	84985.2	15.8322	13455
2014	AK	Alaska	2014_AK	53303.3	6.9	737075	1	0	72317.3	45.67	3.117	4.37	46.16	0		2.3222	20.4885	4.99242	0.685487					3	22	281438	605.111	19.1361	115.795	4	23	51017	4510.78	17.0949	771.112	1	11	1287	88039.4	15.6646	13791
2015	AK	Alaska	2015_AK	53681.1	6.5	738430	1	0	72696.3	42.6	1.822	2.62	44.13	0	5.82	2.25949	12.0877	3.38436	0.669639					2	21	282282	603.47	19.8255	119.641	3	22	50642	4547.43	17.4359	792.884	1	11	1299	86703.2	14.5253	12593.9
2016	AK	Alaska	2016_AK	53463.9	6.9	742575	1	0	71998	40.39	1.702	2.52	42.43	0		3.08	11.3093	3.29247	0.656367	9644				2	22	283260	590.268	20.3034	119.844	3	22	52804	4310.75	17.5562	756.803	1	11	1343	85958.7	15.2173	13080.6
2017	AK	Alaska	2017_AK	53550.9	7	740983	1	0	72270.1	39.08	2.23	2.99	38.8	0		2.18759	14.7344	3.72435	0.628028					2	20	285697	600.971	21.2702	127.828	3	21	53472	4215.43	18.8892	796.261	1	10	1374	86157.2	16.3398	14077.9
2018	AK	Alaska	2018_AK	52479.6	6.6	736624	1	0	71243.4	39.08	2.6	3.15	38.81	0	7.17	2.18759	17.1346	3.87138	0.628106					2	21	287526	572	21.94	125.57	3	21	53957	4086.68	18.5789	759.26	1	10	1387	81201	17.1	13888.3
2019	AK	Alaska	2019_AK	52325.3		733603	1	0	71326.5	38.52	2.449	2.56	35.59	0	7.11	3.51	15.74	6.97	0.602968	11035	5016	24442		12	55	289290	555	22.92	127.29	12	54	55080	3992	19.8	790.35	2	15	1126	92639.9	16.9428	15695.8
2020	AK	Alaska	2020_AK	50344.6			1	0		36.13	1.891	2.03	33.27	0		3.46	11.67	6.42	0.584856	11400	5826	22908		1	1	315208	552.293	22.5714	124.66	3	12	61993	3393.01	19.5753	664.192	1	6	1129	96281	15.8849	15294.2
2006	AL	Alabama	2006_AL	199924	4	4628981	1	0	43189.6	41.9669	2.137	6.73	18.61	0	2.26	2.24655	14.1311	7.16101	0.41					1	61	2065096	1302.49	8.75138	113.985	1	61	359846	5122.55	8.17609	418.824	1	56	8878	340549	4.90081	16689.6
2007	AL	Alabama	2007_AL	202026	4	4672840	1	0	43234	41.9669	2.286	6.97	32.78	0	2.29	2.24655	15.0977	7.38155	0.42					1	61	2093093	1305	9.32419	121.7	1	61	365740	5211	8.70312	453.56	1	56	9828	306713	5.27045	16165.1
2008	AL	Alabama	2008_AL	200967	5.7	4718206	1	0	42594	40.69	2.983	8.86	45.88	0	2.93	2.22047	19.6192	9.11825	0.47					1	61	2110859	1271	10.4012	132.16	1	61	371024	5061	9.86589	499.31	1	57	9260	314881	6.11159	19244.3
2009	AL	Alabama	2009_AL	194192	11	4757938	1	0	40814.3	43.33	2.141	3.94	45.86	0		2.2744	14.1571	4.5973	0.56					1	61	2128009	1233	10.66	131.42	1	61	353885	5161	10.05	518.89	1	57	9252	265138	5.96	15807.4
2010	AL	Alabama	2010_AL	201373	10.5	4785514	1	0	42079.7	44.27	2.705	4.37	49.29	0		2.2936	17.8158	4.99242	0.63			287408	396557	1	61	2138911	1384	10.67	147.69	1	61	356296	5376	10.18	547.09	1	56	6915	389848	6.01	23440
2011	AL	Alabama	2011_AL	201373	9.6	4799642	1	0	41955.8	45.02	3.467	4	55.64	0		2.30892	22.05	4.65243	0.759496		1080			1	61	2142625	1284	11.09	142.41	1	61	356074	5209	10.47	545.62	1	56	6491	433105	6.25	27052.9
2012	AL	Alabama	2012_AL	203676	8	4816632	1	0	42285.9	45.77	3.58	2.75	54.99	0		2.32424	23.492	3.50382	0.754422		815			1	52	2150977	1186.76	11.3977	135.263	1	51	357395	5082.89	10.6341	540.519	1	47	7168	392382	6.22479	24424.9
2013	AL	Alabama	2013_AL	206963	7.2	4831586	1	0	42835.4	45.02	3.483	3.73	51.99	0		2.30892	22.8627	4.40433	0.731001					1	52	2158898	1211.21	11.2579	136.358	1	51	358712	5251.02	10.5144	552.112	1	45	7029	401553	5.94766	23883
2014	AL	Alabama	2014_AL	206070	6.8	4843737	1	0	42543.6	45.67	3.117	4.37	46.16	0		2.3222	20.4885	4.99242	0.685487					1	51	2169790	1264.7	11.4849	145.249	1	51	360901	5294.46	10.7879	571.16	1	45	7236	398872	6.15244	24540.3
2015	AL	Alabama	2015_AL	208950	6.1	4854803	1	0	43039.9	42.6	1.822	2.62	44.13	0		2.44	12.66	3.38436	0.73		724		438728	1	51	2182616	1218.28	11.6954	142.483	1	52	362871	5382.5	10.8314	583	1	45	7254	384836	6.03393	23220.7
2016	AL	Alabama	2016_AL	212863	5.8	4866824	1	0	43737.5	40.39	1.702	2.52	42.43	0	1.98	2.21434	11.3093	2.95	0.69			425641	417334	1	52	2200574	1213.91	11.9898	145.545	1	52	367009	5366.46	11.1144	596.448	1	45	7266	373143	6.04339	22550.5
2017	AL	Alabama	2017_AL	216616	4.4	4877989	1	0	44406.7	39.08	2.23	2.99	38.8	0	2.02	2.18759	13.52	3.72435	0.628028		324			1	51	2213592	1136.2	12.5466	142.555	1	52	369984	5122.7	11.5966	594.058	1	44	8047	345024	6.15981	21252.8
2018	AL	Alabama	2018_AL	220809	3.9	4891628	1	0	45140.1	39.08	2.6	3.15	38.81	0		2.18759	17.1346	3.87138	0.628106					1	52	2229472	1236	12.18	150.54	1	52	371097	5273.35	11.2389	592.667	1	44	7343	382701	6.01	23014.4
2019	AL	Alabama	2019_AL	224945		4907965	1	0	45832.6	38.52	2.449	2.56	35.59	0		2.17615	16.1551	3.32923	0.602968					1	61	2249425	1201	12.53	150.45	1	62	369798	5200	11.52	598.89	1	54	7245	375006	5.95022	22313.6
2020	AL	Alabama	2020_AL	222081			1	0		36.13	1.891	2.03	33.27	0	1.64	2.12733	12.5353	2.84222	0.584856					1	1	2280741	1144.77	12.575	143.954	1	46	371888	4774.68	11.5469	551.33	1	41	7240	354015	5.87358	20793.3
2006	AR	Arkansas	2006_AR	114890	5.2	2821761	1	0	40715.9	41.9669	2.137	6.73	18.61	1		1.47	14.17	7.16101	0.470406	247823	278			4	36	1283520	1107.96	8.85263	98.0837	4	36	171018	5642.94	6.95838	392.657	4	32	31422	47710.8	5.24286	2501.41
2007	AR	Arkansas	2007_AR	114027	5.3	2848650	1	0	40028.3	41.9669	2.286	6.97	32.78	1		1.6	14.79	7.38155	0.58103	265232	363			4	36	1298492	1118	8.73125	97.58	4	36	173714	5661	6.91494	391.47	4	33	31471	47237	5.24943	2479.66
2008	AR	Arkansas	2008_AR	113628	5.5	2874554	1	0	39528.9	40.69	2.983	8.86	45.88	1		1.72	16.41	9.11825	0.683301	269282	256			4	36	1308810	1107	9.27275	102.69	4	36	176049	5540	7.60786	421.46	4	33	31694	44799	5.8903	2638.82
2009	AR	Arkansas	2009_AR	109833	7.8	2896843	1	0	37914.8	43.33	2.141	3.94	45.86	1		1.67	16.01	4.5973	0.683145	256654	371			4	36	1315041	1076	9.14	98.38	4	36	177635	5384	7.56	406.96	4	33	31757	38601	5.76	2223.73
2010	AR	Arkansas	2010_AR	115242	8.2	2921998	1	0	39439.4	44.27	2.705	4.37	49.29	1		1.71	16.14	4.99242	0.709922	286417	318			4	36	1322833	1211	8.86	107.28	4	36	178962	5675	7.31	414.72	4	33	32408	43134	5.44	2348.24
2011	AR	Arkansas	2011_AR	115242	8.3	2941038	1	0	39184.1	45.02	3.467	4	55.64	1		2.30892	22.7589	4.65243	0.759496					4	36	1328286	1179	9.02	106.27	4	36	180291	5614	7.5	421.11	4	33	32761	43227	5.63	2434.4
2012	AR	Arkansas	2012_AR	116616	7.6	2952876	1	0	39492.4	45.77	3.58	2.75	54.99	1		2.32424	23.492	3.50382	0.754422					4	31	1332154	1120.32	9.29515	104.136	4	30	181823	5546.62	7.71413	427.874	4	28	33926	41383.6	5.76496	2385.75
2013	AR	Arkansas	2013_AR	119843	7.2	2960459	1	0	40481.2	45.02	3.483	3.73	51.99	1	2.43	2.4	22.06	4.83	0.61			95845	124816	4	31	1339680	1133.31	9.58594	108.638	4	30	182941	5419.76	8.0461	436.079	4	28	34699	39783.5	6.0358	2401.25
2014	AR	Arkansas	2014_AR	121409	6	2968759	1	0	40895.7	45.67	3.117	4.37	46.16	1		2.3222	20.4885	4.99242	0.685487					4	30	1345009	1142.56	9.50747	108.629	4	30	185842	5375.55	8.04798	432.623	4	28	35685	38883.6	6.02033	2340.92
2015	AR	Arkansas	2015_AR	121532	5	2979732	1	0	40786.4	42.6	1.822	2.62	44.13	1		2.25949	12.0877	3.38436	0.669639					4	30	1356658	1122.45	9.81921	110.216	4	30	187706	5395.51	8.32041	448.929	4	28	35868	37261.8	6.22741	2320.45
2016	AR	Arkansas	2016_AR	123035	4	2991815	1	0	41123.8	40.39	1.702	2.52	42.43	1		2.21434	11.3093	3.29247	0.656367					4	31	1368867	1082.66	9.92413	107.445	4	30	190181	5335.98	8.23011	439.157	4	28	36428	37119.2	6.07715	2255.79
2017	AR	Arkansas	2017_AR	123883	3.7	3003855	1	0	41241.2	39.08	2.23	2.99	38.8	1		2.18759	14.7344	3.72435	0.628028					4	30	1380157	1028.07	10.276	105.645	4	30	191879	5173.62	8.51158	440.357	4	29	35595	40142	6.07189	2437.38
2018	AR	Arkansas	2018_AR	126371	3.7	3012161	1	0	41953.7	39.08	2.6	3.15	38.81	1		1.98	16.48	3.3	0.628106	300080	321	155902		4	31	1388358	1156	9.81	113.36	4	30	196482	5207.55	7.74923	403.545	4	29	36596	41136	5.64	2319.98
2019	AR	Arkansas	2019_AR	127216		3020985	1	0	42110.8	38.52	2.449	2.56	35.59	1		2.17615	16.1551	3.32923	0.602968					4	36	1396870	1118	9.8	109.46	4	36	198861	5007	8.78	439.86	4	33	34864	41617.9	6.13221	2552.1
2020	AR	Arkansas	2020_AR	128061			1	0		36.13	1.891	2.03	33.27	1		2.12733	12.5353	2.84222	0.584856					1	1	1413490	1060.04	10.4082	110.331	4	28	197869	4679.2	8.61102	402.927	4	27	35978	38820.4	5.89155	2287.13
2006	AZ	Arizona	2006_AZ	296424	4.2	6029141	1	0	49165.3	41.9669	2.137	6.73	18.61	0	2.58	1.42	16.31	7.16101	0.470406	415655	762			5	33	2442903	1104.13	9.39754	103.761	5	34	280070	8517.49	8.01675	682.826	5	33	7397	138112	5.68955	7857.96
2007	AZ	Arizona	2007_AZ	306612	3.9	6167681	1	0	49712.6	41.9669	2.286	6.97	32.78	0	2.78	1.57	16.71	7.38155	0.58103	423202	490			5	34	2513923	1142	9.66293	110.31	5	35	291457	8713	8.26692	720.34	5	33	7418	137967	6.04649	8342.17
2008	AZ	Arizona	2008_AZ	302278	6.2	6280362	1	0	48130.6	40.69	2.983	8.86	45.88	0	3.26	1.73	20.5	9.11825	0.683301	445798	512		305726	5	34	2528405	1095	10.2668	112.47	5	35	298347	8425	8.92894	752.25	5	34	7314	146629	6.57383	9639.16
2009	AZ	Arizona	2009_AZ	277412	9.9	6343154	1	0	43734.1	43.33	2.141	3.94	45.86	0	2.04	1.81	14.73	4.5973	0.59	404530	599			5	35	2544383	1076	10.73	115.42	5	36	299528	8176	9.35	764.52	5	35	7204	129562	6.65	8622.26
2010	AZ	Arizona	2010_AZ	290411	10.4	6407342	1	0	45324.8	44.27	2.705	4.37	49.29	0	2.13	1.79	18.23	4.99242	0.69	447137	678			5	35	2554213	1059	10.97	116.09	5	36	300507	8026	9.47	760.29	5	37	7143	133487	6.63	8853.77
2011	AZ	Arizona	2011_AZ	290411	9.5	6473416	1	0	44862.1	45.02	3.467	4	55.64	0		1.98	22.7589	4.65243	0.82			183896		5	35	2575586	1070	11.08	118.62	5	36	305340	8054	9.5	764.94	5	37	7212	142728	6.55	9355.42
2012	AZ	Arizona	2012_AZ	297077	8.3	6556344	1	0	45311.4	45.77	3.58	2.75	54.99	0		2.32424	23.492	3.50382	0.754422					5	25	2585638	1061.08	11.2941	119.84	5	25	305250	8105.99	9.52959	772.468	5	21	7740	134024	6.53186	8754.24
2013	AZ	Arizona	2013_AZ	298860	7.7	6634690	1	0	45045	45.02	3.483	3.73	51.99	0	2.26	2.07	22.8627	4.40433	0.92		465			5	25	2630595	1048.67	11.7147	122.849	5	26	308857	8104.89	9.84712	798.098	5	21	7624	136910	6.6564	9113.26
2014	AZ	Arizona	2014_AZ	301721	6.8	6732873	1	0	44813.1	45.67	3.117	4.37	46.16	0		2.1	20.4885	5.15	0.685487				338044	5	24	2661694	1012.7	11.8994	120.506	5	25	312221	7817.61	10.1323	792.105	5	22	7710	158471	6.46365	10243
2015	AZ	Arizona	2015_AZ	308583	6.1	6832810	1	0	45161.9	42.6	1.822	2.62	44.13	0		2.25949	12.0877	3.38436	0.669639					5	24	2689223	1027.78	12.1305	124.675	5	25	314756	7753.21	10.3908	805.622	5	22	7759	159939	6.26295	10016.9
2016	AZ	Arizona	2016_AZ	319008	5.4	6944767	1	0	45935.1	40.39	1.702	2.52	42.43	0		2.21434	11.3093	3.29247	0.656367					5	34	2725510	1030.11	12.153	125.188	5	25	318197	7742.62	10.4119	806.152	4	21	8130	153502	6.06783	9314.24
2017	AZ	Arizona	2017_AZ	333099	4.9	7048088	1	0	47260.9	39.08	2.23	2.99	38.8	0	2.04	2.18759	14.7344	3.61	0.628028			232643		5	24	2764355	1032.53	12.4354	128.399	5	25	320562	7715.99	10.4957	809.846	4	21	8133	140436	6.45124	9059.89
2018	AZ	Arizona	2018_AZ	346398	4.8	7164228	1	0	48351.1	39.08	2.6	3.15	38.81	0		2.18759	17.24	2.96	0.628106					5	33	2808352	1028	12.77	131.31	5	25	322135	7678.86	10.6399	817.02	4	21	7794	149628	6.55	9796.76
2019	AZ	Arizona	2019_AZ	359646		7291843	1	0	49321.6	38.52	2.449	2.56	35.59	0		2.17615	16.89	2.14	0.602968	251170				5	35	2853183	1014	12.43	126.09	5	36	326191	7515	10.25	769.93	4	36	7899	145406	6.27773	9128.17
2020	AZ	Arizona	2020_AZ	362604			1	0		36.13	1.891	2.03	33.27	0		2.12733	12.5353	2.84222	0.7					1	1	2896339	1113.69	12.2743	136.697	5	19	331229	7328.31	10.1082	740.763	4	16	7595	154851	6.06983	9399.21
2006	CA	California	2006_CA	2.12044e+06	4.9	36021202	0	0	58866.3	41.9669	2.137	6.73	18.61	1		2.24655	13.84	7.16101	0.470406					6	44	12689438	589.964	14.3323	84.5555	6	45	1751882	5767.85	12.8952	743.776	6	40	79036	53763.4	10.0901	5424.76
2007	CA	California	2007_CA	2.16894e+06	5.4	36250311	0	1	59832.3	41.9669	2.286	6.97	32.78	1		2.24655	16.19	7.38155	0.58103					6	44	12819149	580	14.4236	83.6	6	45	1785796	5772	12.8178	739.84	6	40	78620	53568	9.98447	5348.49
2008	CA	California	2008_CA	2.19233e+06	7.3	36604337	0	1	59892.7	40.69	2.983	8.86	45.88	1		2.22047	22.58	9.11825	0.683301					6	44	12941717	587	13.8053	81.1	6	47	1807261	5765	12.5391	722.88	6	40	77326	54996	10.0438	5523.65
2009	CA	California	2009_CA	2.11068e+06	11.2	36961229	0	1	57105.2	43.33	2.141	3.94	45.86	1		2.2744	14.38	4.5973	0.683145					6	43	12910856	580	14.74	85.45	6	47	1801936	5601	13.42	751.56	6	39	76223	52297	10.07	5264.98
2010	CA	California	2010_CA	2.19289e+06	12.2	37319550	0	1	58759.7	44.27	2.705	4.37	49.29	1		2.2936	17.8158	4.99242	0.709922					6	43	12947917	562	14.75	82.85	6	47	1814634	5564	13.1	728.58	6	39	75160	54662	9.8	5355.65
2011	CA	California	2011_CA	2.19289e+06	11.7	37636311	0	1	58265.2	45.02	3.467	4	55.64	1		2.30892	22.7589	4.65243	0.759496					6	44	13002980	567	14.78	83.7	6	47	1818049	5628	13.05	734.21	6	39	73297	56773	10.11	5737.46
2012	CA	California	2012_CA	2.25544e+06	10.4	37944551	0	1	59440.3	45.77	3.58	2.75	54.99	1		2.32424	23.492	3.50382	0.754422					6	42	13101887	573.136	15.3385	87.9108	6	43	1834779	5531.62	13.4058	741.559	5	35	73805	53013.2	10.4905	5561.37
2013	CA	California	2013_CA	2.34034e+06	8.9	38253768	0	1	61179.2	45.02	3.483	3.73	51.99	1	3.89	1.96	23.23	4.4	0.71	6214		849409	187162	6	43	13359503	557.15	16.1881	90.1921	6	46	1794018	5758.54	14.2228	819.023	5	38	71556	55200.6	10.962	6051.09
2014	CA	California	2014_CA	2.42868e+06	7.5	38586706	0	1	62940.7	45.67	3.117	4.37	46.16	1		2.49	20.4885	4.99242	0.685487					6	42	13256068	561.76	16.2458	91.2626	6	44	1676201	5940.72	15.6185	927.854	5	37	146944	29999.2	12.3362	3700.77
2015	CA	California	2015_CA	2.54598e+06	6.2	38904296	0	1	65442.1	42.6	1.822	2.62	44.13	1		2.25949	12.0877	3.38436	0.669639					6	42	13380684	556.688	16.9912	94.588	6	43	1685688	5852.41	15.7344	920.845	5	37	148069	29582	12.1653	3598.73
2016	CA	California	2016_CA	2.62371e+06	5.5	39149186	0	1	67018.3	40.39	1.702	2.52	42.43	1	2.88	2.21434	11.3093	3.29247	0.656367					6	53	13445133	547.355	17.3928	95.2005	6	45	1692326	5750.21	15.0745	866.814	5	38	148549	28598.4	11.92	3408.93
2017	CA	California	2017_CA	2.74055e+06	4.8	39337785	0	1	69667.1	39.08	2.23	2.99	38.8	1		2.18759	14.7344	3.72435	0.628028				187227	6	42	13548295	554.335	18.3092	101.494	6	46	1696071	5782.11	15.7647	911.53	5	37	147754	27425.9	12.7288	3490.99
2018	CA	California	2018_CA	2.85097e+06	4.2	39437463	0	1	72290.9	39.08	2.6	3.15	38.81	1		2.18759	17.24	3.87138	0.628106		378	635418		6	53	13591152	546	18.84	102.9	6	47	1714875	5626.58	16.3441	919.616	5	38	148743	27852	13.2	3675.86
2019	CA	California	2019_CA	2.96279e+06		39437610	0	1	75126.1	38.52	2.449	2.56	35.59	1		2.17615	16.1551	3.32923	0.602968					6	50	13707126	532	19.15	101.92	6	54	1718601	5541	16.67	923.82	5	43	147660	26980.7	13.3989	3615.13
2020	CA	California	2020_CA	2.92515e+06			0	1		36.13	1.891	2.03	33.27	1	2.74	2.12733	13.73	3.26	0.584856		359	635462		1	1	13834719	571.838	20.4492	116.936	6	33	1725533	5167.79	17.5292	905.875	5	28	148130	26795.7	14.2706	3823.9
2006	CO	Colorado	2006_CO	268191	4.3	4720423	1	0	56815	41.9669	2.137	6.73	18.61	0	2.23	2.24655	14.69	5.99	0.470406			96532		2	58	2030827	695.592	9.01998	62.7423	2	59	345297	4863.6	7.50496	365.011	2	42	13409	78335.6	5.88108	4606.97
2007	CO	Colorado	2007_CO	278734	3.7	4803868	1	0	58022.8	41.9669	2.286	6.97	32.78	0	2.01	2.24655	18.45	4.19	0.58103			128437		2	58	2068901	710	9.25318	65.72	2	59	347171	4923	7.61802	375	2	42	12369	88345	5.96897	5273.3
2008	CO	Colorado	2008_CO	281803	4.8	4889730	1	0	57631.7	40.69	2.983	8.86	45.88	0	2.66	2.22047	21.67	6.77	0.683301			110429		3	59	2173458	679	10.1264	68.8	3	60	359898	4759	8.57326	407.96	3	43	13170	87462	6.65038	5816.55
2009	CO	Colorado	2009_CO	275659	7.3	4972195	1	0	55440.1	43.33	2.141	3.94	45.86	0		2.2744	12.73	4.13	0.683145			119160		2	58	2111623	687	10	68.69	2	59	349267	4774	8.15	389.18	2	40	14918	75810	6.39	4843.28
2010	CO	Colorado	2010_CO	283964	8.7	5047539	1	0	56257.9	44.27	2.705	4.37	49.29	0		2.2936	17.8158	5.02	0.709922			95210		2	58	2128507	709	11.04	78.22	2	59	350073	4665	9.13	426.11	2	40	15060	83952	6.9	5796.27
2011	CO	Colorado	2011_CO	283964	8.4	5121900	1	0	55441.1	45.02	3.467	4	55.64	0	2.33	1.72	23.63	4.81	0.759496		248			2	58	2141780	711	11.27	80.12	2	59	347903	4764	9.44	449.84	2	39	16425	77330	7.06	5458.56
2012	CO	Colorado	2012_CO	289340	7.9	5193660	1	0	55710.1	45.77	3.58	2.75	54.99	0	2.28	1.84	23.492	4.01	0.754422	363589		90079		2	41	2149637	706.335	11.4591	80.9396	2	41	348752	4778.28	9.39312	448.83	2	30	16017	80202.5	6.94648	5571.25
2013	CO	Colorado	2013_CO	301484	6.9	5270774	1	0	57199.2	45.02	3.483	3.73	51.99	0	2.5	1.91	23.6	4.7	0.731001	355912	105	93978		2	41	2169365	711.764	11.929	84.9064	2	41	358800	4667.93	9.86176	460.339	2	31	16172	76020.6	7.34091	5580.6
2014	CO	Colorado	2014_CO	315399	5	5352637	1	0	58924	45.67	3.117	4.37	46.16	0	2.69	1.93	20.4885	5.21	0.685487	341975	171			2	40	2193520	687.363	12.1807	83.7253	2	41	360237	4656.51	10.0801	469.379	2	31	19234	65466.5	7.47423	4893.11
2015	CO	Colorado	2015_CO	330526	3.9	5454328	1	0	60598.9	42.6	1.822	2.62	44.13	0	2.22	1.83	14.74	3.52	0.669639	331972				2	40	2225725	688.35	12.1186	83.4181	2	41	365563	4652.2	9.8812	459.693	2	32	16229	78351.3	7.39916	5797.34
2016	CO	Colorado	2016_CO	337685	3.2	5543844	1	0	60911.7	40.39	1.702	2.52	42.43	0		1.85	11.3093	3.12	0.656367	314876	95			2	48	2260068	694.438	12.074	83.8462	2	41	367001	4723	9.59629	453.233	2	33	16245	77477.3	7.34859	5693.49
2017	CO	Colorado	2017_CO	350209	2.7	5617421	1	0	62343.4	39.08	2.23	2.99	38.8	0	2.2	1.77	14.69	3.44	0.628028					2	40	2288358	677.888	12.1652	82.4666	2	41	370691	4640.16	9.89026	458.924	2	33	16228	79601.3	7.50319	5972.63
2018	CO	Colorado	2018_CO	365204	3.3	5697155	1	0	64103	39.08	2.6	3.15	38.81	0		1.64	16.41	3.62	0.628106	280637				2	48	2326976	691	12.15	83.9	2	41	376104	4658.13	10.0161	466.562	2	33	15985	83658	7.47	6248.21
2019	CO	Colorado	2019_CO	383596		5758486	1	0	66614	38.52	2.449	2.56	35.59	0		2.17615	16.1551	3.07	0.602968					2	57	2370164	682	12.18	83.07	2	58	380609	4622	10.43	482.27	2	41	14386	92051.4	7.396	6808.12
2020	CO	Colorado	2020_CO	380922			1	0		36.13	1.891	2.03	33.27	0	2.17	2.12733	12.5353	2.84222	0.584856		113			1	1	2400357	711.092	12.3585	87.8806	2	34	384518	4343.58	10.2908	446.99	2	31	15209	84552.3	7.48404	6327.92
2006	CT	Connecticut	2006_CT	269479	4.3	3517460	0	0	76611.7	41.9669	2.137	6.73	18.61	1		2.24655	14.1311	7.32	0.43			76747		2	9	1437836	751.33	16.8561	126.645	2	10	152984	7414.19	14.0268	1039.97	2	8	5361	76571.2	11.7078	8964.79
2007	CT	Connecticut	2007_CT	278485	4.5	3527270	0	0	78952.1	41.9669	2.286	6.97	32.78	1		2.24655	15.0977	7.72	0.47			74500		2	9	1459141	764	19.1114	145.95	2	10	158922	7932	15.3884	1220.55	2	8	5986	75640	12.9205	9773.12
2008	CT	Connecticut	2008_CT	277793	5.7	3545579	0	0	78349.2	40.69	2.983	8.86	45.88	1		2.22047	19.6192	10.34	0.47			60155		2	9	1452080	731	19.5459	142.79	2	10	155328	7331	17.1198	1255.11	2	9	5233	69611	14.9344	10395.9
2009	CT	Connecticut	2009_CT	265531	7.9	3561807	0	0	74549.5	43.33	2.141	3.94	45.86	1		2.2744	14.1571	4.83	0.683145			71720		2	9	1447250	724	20.33	147.25	2	10	148175	7456	16.86	1257.12	2	9	4881	63034	14.92	9404.38
2010	CT	Connecticut	2010_CT	261556	9.1	3579173	0	0	73077.2	44.27	2.705	4.37	49.29	1		2.2936	17.8158	5.6	0.709922			86627	175074	2	9	1451808	750	19.25	144.4	2	10	153847	7273	16.45	1196.26	2	9	4973	62219	14.5	9022.73
2011	CT	Connecticut	2011_CT	261556	8.8	3588632	0	0	72884.5	45.02	3.467	4	55.64	1		2.30892	22.7589	4.65243	0.759496					2	9	1453864	740	18.11	134.07	2	10	150087	7266	15.57	1131.51	2	9	4757	64260	13.24	8508.16
2012	CT	Connecticut	2012_CT	263650	8.3	3595211	0	0	73333.6	45.77	3.58	2.75	54.99	1		2.32424	23.492	3.50382	0.754422					2	9	1454651	730.853	17.3433	126.754	2	10	150435	7188.07	14.6523	1053.22	2	9	4647	63947.1	12.6729	8103.97
2013	CT	Connecticut	2013_CT	258911	7.8	3595792	0	0	72003.9	45.02	3.483	3.73	51.99	1		2.30892	22.8627	4.40433	0.731001	7679				2	9	1454963	752.336	17.5542	132.066	2	11	150419	7207.15	14.6338	1054.68	2	10	4568	63670.1	12.6066	8026.61
2014	CT	Connecticut	2014_CT	260606	6.6	3595697	0	0	72477.1	45.67	3.117	4.37	46.16	1	3.34	2.3222	20.01	4.99242	0.72	9097		102964	165677	2	9	1459239	729.694	19.7483	144.102	2	10	155372	6915.41	15.5476	1075.18	2	9	4648	63016.3	12.9156	8138.94
2015	CT	Connecticut	2015_CT	268870	5.7	3588561	0	1	74924.1	42.6	1.822	2.62	44.13	1		2.25949	16.73	3.38436	0.669639		1289			2	9	1468958	731.406	20.9364	153.13	2	10	152482	7082.02	15.9707	1131.05	2	9	4458	64154.4	12.9542	8310.68
2016	CT	Connecticut	2016_CT	268196	5.1	3579830	0	1	74918.7	40.39	1.702	2.52	42.43	1	2.02	2.21434	9.76	3.58	0.71		359	126241	173363	2	18	1486741	710.558	20.0108	142.189	2	10	152182	6955.08	15.7501	1095.43	2	9	4408	63711.2	12.8111	8162.12
2017	CT	Connecticut	2017_CT	273875	4.7	3575324	0	1	76601.5	39.08	2.23	2.99	38.8	1		4.34	14.05	4.24	0.71	2507	525	111655	172570	2	9	1495577	689.785	20.2918	139.97	2	10	152903	6722.9	16.0627	1079.88	2	9	4385	61642.2	13.1022	8076.52
2018	CT	Connecticut	2018_CT	274583	4.1	3574561	0	1	76815.8	39.08	2.6	3.15	38.81	1	2.6	2.18759	17.1346	3.87138	0.628106					2	17	1503701	724	21.2	153.46	2	10	153824	6707.38	16.7593	1124.11	2	9	4308	62094	13.77	8549.9
2019	CT	Connecticut	2019_CT	274219		3566022	0	1	76897.8	38.52	2.449	2.56	35.59	1	1.99	3.35	16.64	3.32923	0.602968					2	9	1510966	689	21.87	150.71	2	10	151979	6666	16.75	1116.33	2	9	4204	60890.3	13.4353	8180.77
2020	CT	Connecticut	2020_CT	258625			0	1		36.13	1.891	2.03	33.27	1	1.53	3.11	9.58	2.41	0.62					1	1	1521112	711.203	22.7147	161.547	2	6	154894	5996.52	16.5831	994.409	2	6	4130	57713.7	13.0699	7543.1
2006	DC	District of Columbia	2006_DC	108848	5.8	570681	0	0	190734	41.9669	2.137	6.73	18.61	0		2.24655	14.1311	7.16101	0.470406					1	1	209316	725.422	9.87833	71.6596	1	1	26756	28124	11.1653	3140.14	0	1	1	1.99868e+07	17.4306	3.48383e+06
2007	DC	District of Columbia	2007_DC	112288	5.5	574404	0	0	195485	41.9669	2.286	6.97	32.78	0		2.24655	15.0977	7.38155	0.58103					1	1	212389	773	11.1825	86.42	1	1	27493	28852	12.0118	3465.66	0	0	13	1901840	9.32195	177288
2008	DC	District of Columbia	2008_DC	116214	6.5	580236	0	0	200287	40.69	2.983	8.86	45.88	0		2.22047	19.6192	9.11825	0.683301					1	1	215355	734	12.7857	93.83	1	1	30896	25058	13.2274	3314.57	0	0	13	1957346	10.4886	205297
2009	DC	District of Columbia	2009_DC	115646	9.3	592228	0	0	195273	43.33	2.141	3.94	45.86	0		2.2744	14.1571	4.5973	0.683145					1	1	217635	712	13.76	97.94	1	1	30632	26426	12.96	3426.13	0	0	4	6354250	8.41	534538
2010	DC	District of Columbia	2010_DC	122636	9.4	605282	0	0	202610	44.27	2.705	4.37	49.29	0		2.2936	16.22	4.99242	0.709922					1	1	227550	778	14.01	108.93	1	1	26449	29016	13.42	3894.19	1	1	1	19133083	7.78	1.48907e+06
2011	DC	District of Columbia	2011_DC	122636	10.2	620290	0	0	197708	45.02	3.467	4	55.64	0	15.25	2.30892	22.7589	4.65243	0.759496					1	1	229450	749	13.4	100.3	1	1	26496	28199	12.9	3638.99	1	1	1	18020333	6.89	1240750
2012	DC	District of Columbia	2012_DC	123568	9	635737	0	0	194370	45.77	3.58	2.75	54.99	0	22.91	2.32424	22.91	3.50382	0.754422					1	1	231550	720.696	12.2815	88.512	1	1	26547	27351.9	12.0225	3288.38	1	1	1	18198000	5.45788	993225
2013	DC	District of Columbia	2013_DC	124095	8.5	651559	0	0	190458	45.02	3.483	3.73	51.99	0		2.30892	22.8627	4.40433	0.731001					1	1	235322	720.154	12.5675	90.5054	1	1	26530	26696.6	11.9413	3187.93	1	1	1	18948750	5.53691	1049175
2014	DC	District of Columbia	2014_DC	126884	7.8	663603	0	0	191205	45.67	3.117	4.37	46.16	0		2.3222	20.4885	4.99242	0.685487					1	1	239355	721.455	12.7387	91.9042	1	1	26463	26918.8	12.1945	3282.63	1	1	1	20179083	8.41098	1.69726e+06
2015	DC	District of Columbia	2015_DC	129110	6.9	677014	0	0	190705	42.6	1.822	2.62	44.13	0		2.25949	12.0877	3.38436	0.669639					1	1	247469	841.034	12.985	109.209	1	1	25439	26932.4	12.0062	3233.57	1	1	1	19852667	8.7845	1.74396e+06
2016	DC	District of Columbia	2016_DC	132218	6.1	687576	0	1	192296	40.39	1.702	2.52	42.43	0		2.21434	11.3093	2.97	0.656367					1	4	259392	803.768	12.2909	98.7906	1	1	25924	26900.7	11.7181	3152.26	1	1	1	16037833	8.80366	1.41192e+06
2017	DC	District of Columbia	2017_DC	134299	6.1	697079	0	1	192659	39.08	2.23	2.99	38.8	0		2.18759	14.7344	3.72435	0.628028					1	1	267448	746.143	12.9357	96.5185	1	1	26111	25551.9	11.658	2978.85	1	1	1	15015250	8.22813	1235475
2018	DC	District of Columbia	2018_DC	138057	5.6	704147	0	1	196062	39.08	2.6	3.15	38.81	0		2.18759	17.1346	3.87138	0.628106					1	4	274613	787	12.84	101.01	1	1	26336	26061.4	11.9685	3119.15	1	1	1	16055167	8.3	1331850
2019	DC	District of Columbia	2019_DC	138867		708253	0	1	196070	38.52	2.449	2.56	35.59	0		2.17615	16.1551	3.32923	0.602968					1	1	282277	752	12.98	97.62	1	1	26471	25035	12.26	3069.38	1	1	1	14969333	8.22459	1.23117e+06
2020	DC	District of Columbia	2020_DC	137762			0	1		36.13	1.891	2.03	33.27	0		2.12733	12.5353	2.84222	0.584856					1	1	290466	703.636	12.6332	88.8918	1	1	26672	21291.2	11.8534	2523.74	1	1	1	15528667	7.98588	1240100
2006	DE	Delaware	2006_DE	68411.8	3.6	859268	0	0	79616.4	41.9669	2.137	6.73	18.61	1		2.24655	13.88	7.59	0.470406	53921	427			1	11	381642	929.894	11.8489	110.182	1	11	47098	7424.25	10.2129	758.229	1	7	610	423501	7.66516	32462
2007	DE	Delaware	2007_DE	68132.4	3.4	871749	0	0	78156	41.9669	2.286	6.97	32.78	1		2.24655	15.22	7.75	0.58103	61108	331			1	11	387923	960	13.1647	126.4	1	11	48590	7410	11.2075	830.5	1	7	616	416458	8.92506	37169.1
2008	DE	Delaware	2008_DE	65771.3	4.9	883874	0	0	74412.5	40.69	2.983	8.86	45.88	1		3.56	20.26	10.58	0.683301	58693	500			1	11	391810	942	13.9335	131.23	1	11	48966	7384	12.0652	890.91	1	7	619	401416	10.4541	41964.3
2009	DE	Delaware	2009_DE	69186.2	8.3	891730	0	0	77586.5	43.33	2.141	3.94	45.86	1		2.2744	11.59	4.87	0.683145	33373	660			1	11	393836	917	14.07	129.07	1	11	49057	7109	11.98	851.69	1	8	1242	183705	9.34	17165.1
2010	DE	Delaware	2010_DE	71103.5	8.4	899647	0	0	79034.9	44.27	2.705	4.37	49.29	1		3.35	16.04	5.15	0.709922	30253	561			1	11	396114	1001	13.8	138.24	1	11	49986	7202	11.36	818.33	1	8	1241	169617	9.57	16235.8
2011	DE	Delaware	2011_DE	71103.5	7.5	907590	0	0	78343.2	45.02	3.467	4	55.64	1	4.6	3.41	22.7589	4.65243	0.759496					1	11	398109	970	13.7	132.83	1	11	50369	7048	10.64	749.74	1	8	1238	174432	8.91	15543.7
2012	DE	Delaware	2012_DE	70562.4	7.2	915518	0	0	77073.7	45.77	3.58	2.75	54.99	1		3.35	22.91	3.31	0.754422					1	11	399998	942.022	13.5798	127.925	1	10	51056	6925.45	10.1295	701.516	1	7	854	268796	8.35743	22464.4
2013	DE	Delaware	2013_DE	68656.8	6.7	924062	0	0	74298.9	45.02	3.483	3.73	51.99	1	3.84	3.2	22.83	4.40433	0.731001		148			1	11	403519	943.783	12.9533	122.251	1	10	51673	6705.3	10.1956	683.644	1	7	848	257473	8.43369	21714.5
2014	DE	Delaware	2014_DE	73961.7	5.7	933131	0	0	79261.9	45.67	3.117	4.37	46.16	1		2.3222	22.19	4.68	0.685487					1	10	407508	949.847	13.2922	126.255	1	10	52203	6700.28	10.4986	703.435	1	7	862	241332	8.58045	20707.4
2015	DE	Delaware	2015_DE	76211.2	4.9	942065	0	0	80898	42.6	1.822	2.62	44.13	1	2.78	2.93	12.0877	2.63	0.669639	7149		47565		1	10	413445	977.357	13.422	131.181	1	10	52786	6660.68	10.2527	682.9	1	7	858	236026	8.28087	19545
2016	DE	Delaware	2016_DE	71941.4	4.5	949989	0	1	75728.7	40.39	1.702	2.52	42.43	1		2.74	10.74	3.29247	0.656367		454			1	13	419234	946.787	13.4174	127.034	1	10	53366	6613.5	10.0701	665.986	1	7	873	215741	8.11401	17505.2
2017	DE	Delaware	2017_DE	69555.6	4.5	957942	0	1	72609.4	39.08	2.23	2.99	38.8	1		2.69	14.7344	3.72435	0.628028					1	10	426071	911.937	13.3485	121.73	1	10	54105	6445.29	9.88833	637.331	1	7	854	222613	7.77571	17309.7
2018	DE	Delaware	2018_DE	70856.4	3.8	966985	0	1	73275.6	39.08	2.6	3.15	38.81	1		2.64	17.1346	3.06	0.628106					1	14	432449	977	12.53	122.43	1	10	54904	6590.81	9.6533	636.23	1	7	837	235024	7.95	18687.6
2019	DE	Delaware	2019_DE	74597.4		976668	0	1	76379.5	38.52	2.449	2.56	35.59	1		2.17615	16.1551	2.57	0.602968					1	11	439167	950	12.55	119.16	1	11	55802	6603	9.53	629.46	1	8	865	196900	7.70053	15162.4
2020	DE	Delaware	2020_DE	72550.3			0	1		36.13	1.891	2.03	33.27	1		2.12733	12.5353	2.84222	0.584856					1	1	446276	931.997	12.5629	117.086	1	6	56764	5993.38	9.18252	550.343	1	5	878	195085	6.70344	13077.4
2006	FL	Florida	2006_FL	909299	3.2	18166990	0	0	50052.3	41.9669	2.137	6.73	18.61	0		2.24655	14.1311	7.16101	0.470406		6774	762892		5	53	8291743	1176.4	11.3313	133.302	5	53	1090153	6979.14	9.90987	691.624	5	34	30889	53330.2	7.70682	4110.06
2007	FL	Florida	2007_FL	922288	4	18367842	0	0	50212.1	41.9669	2.286	6.97	32.78	0		2.24655	15.0977	7.38155	0.58103		7075	794434		5	53	8445561	1163	11.223	130.47	5	53	1117907	7002	9.74554	682.38	5	34	28476	56308	7.75636	4367.42
2008	FL	Florida	2008_FL	891767	6.3	18527305	0	0	48132.6	40.69	2.983	8.86	45.88	0		2.22047	19.6192	9.11825	0.683301		4344	820012		5	53	8478405	1120	11.6544	130.52	5	53	1129098	6879	10.135	697.19	5	34	22383	70533	8.24543	5815.76
2009	FL	Florida	2009_FL	840481	10.4	18652644	0	0	45059.6	43.33	2.141	3.94	45.86	0		2.2744	14.1571	4.5973	0.683145		6025	935701		5	53	8493591	1133	12.39	140.33	5	53	1125135	6834	10.77	735.96	5	34	20457	68917	9.32	6422.81
2010	FL	Florida	2010_FL	849395	11.1	18846143	0	0	45070	44.27	2.705	4.37	49.29	0		2.2936	16.19	4.99242	0.709922		12403			5	53	8529204	1194	11.44	136.61	5	53	1127138	6773	9.76	661.09	5	35	18048	79719	8.85	7058
2011	FL	Florida	2011_FL	849395	10	19055607	0	0	44574.6	45.02	3.467	4	55.64	0		2.30892	22.7589	4.65243	0.759496					5	53	8575892	1131	11.51	130.1	5	53	1139656	6711	9.85	661	5	35	17335	81173	8.55	6941.28
2012	FL	Florida	2012_FL	857861	8.5	19302016	0	1	44444.1	45.77	3.58	2.75	54.99	0		2.32424	23.492	3.50382	0.754422					5	46	8645207	1080.82	11.4217	123.448	5	45	1160572	6608.65	9.66431	638.681	5	30	17414	78603.3	8.03544	6316.12
2013	FL	Florida	2013_FL	880184	7.2	19551678	0	1	45018.3	45.02	3.483	3.73	51.99	0	3.91	3.41	22.8627	5	0.77					5	46	8756322	1078.21	11.2717	121.532	5	45	1175896	6530.1	9.39111	613.249	5	31	17865	76450.8	7.60719	5815.76
2014	FL	Florida	2014_FL	905648	6.3	19853880	0	1	45615.7	45.67	3.117	4.37	46.16	0		3.3	22.12	5.47	0.74	541872	2831	1058227	291474	5	45	8891020	1092.26	11.8887	129.855	5	45	1180768	6558.28	9.86809	647.177	5	30	18779	73319.6	7.90472	5795.71
2015	FL	Florida	2015_FL	945929	5.5	20219111	0	1	46783.9	42.6	1.822	2.62	44.13	0		2.25949	12.0877	4.31	0.669639	451546				5	45	8963967	1141.23	11.5808	132.164	5	45	1183241	6750.32	9.50076	641.332	5	30	19457	72370.8	8.21508	5945.32
2016	FL	Florida	2016_FL	978990	4.8	20627237	0	1	47461	40.39	1.702	2.52	42.43	0		2.21434	11.3093	3.29247	0.656367					5	47	9149214	1123.23	10.9838	123.374	5	45	1199897	6635.79	8.90327	590.802	5	30	21162	65994.2	7.6879	5073.56
2017	FL	Florida	2017_FL	1.01487e+06	4.2	20977089	0	1	48379.8	39.08	2.23	2.99	38.8	0		2.18759	14.7344	4.2	0.628028			1213642		5	44	9291707	1089.35	11.6066	126.436	5	44	1216939	6505.65	9.34869	608.193	5	29	21289	64986.4	7.82658	5086.21
2018	FL	Florida	2018_FL	1.05043e+06	3.6	21254926	0	1	49420.7	39.08	2.6	3.15	38.81	0		2.18759	16.43	4.38	0.63			1294916	306461	5	49	9423022	1110	11.54	128.1	5	44	1229559	6524.38	9.18826	599.477	5	29	21373	66739	7.67	5116.1
2019	FL	Florida	2019_FL	1079271		21492056	0	2	50217.2	38.52	2.449	2.56	35.59	0		2.83	16.1551	3.32923	0.602968	223238				5	53	9565846	1108	11.7	129.65	5	53	1240902	6485	9.27	601.06	5	33	23579	58365.8	7.64981	4464.87
2020	FL	Florida	2020_FL	1.06838e+06			0	2		36.13	1.891	2.03	33.27	0		2.12733	12.5353	2.84222	0.584856			1394330		1	1	9731237	1141.5	11.269	128.636	5	37	1256569	6134.01	8.84526	542.57	5	27	22587	61144.9	7.1546	4374.67
2006	GA	Georgia	2006_GA	487525	4.7	9155813	1	0	53247.6	41.9669	2.137	6.73	18.61	0		2.24655	14.1	7.08	0.44	851994	790			1	97	3924073	1157.82	8.90991	103.161	1	97	529687	7165.63	7.81309	559.857	1	73	15164	190080	5.38026	10226.8
2007	GA	Georgia	2007_GA	492239	4.5	9349988	1	0	52645.9	41.9669	2.286	6.97	32.78	0		2.24655	15.82	7.25	0.49	895834	919			1	97	4001957	1171	9.09521	106.48	1	97	538632	7271	8.06622	586.5	1	74	14706	192971	5.53182	10674.8
2008	GA	Georgia	2008_GA	481860	6.2	9504843	1	0	50696.3	40.69	2.983	8.86	45.88	0		2.22047	16.22	10.05	0.46	849111	950			1	97	4034752	1148	9.92587	113.96	1	97	543498	7187	9.06662	651.66	1	75	15948	169973	6.67135	11339.5
2009	GA	Georgia	2009_GA	464017	9.9	9620846	1	0	48230.4	43.33	2.141	3.94	45.86	0		2.2744	12.46	4.54	0.52	696687	1097			1	98	4061862	1132	10.13	114.64	1	98	545860	7035	8.94	629	1	74	15487	157918	6.12	9661.97
2010	GA	Georgia	2010_GA	481215	10.5	9712209	1	0	49547.5	44.27	2.705	4.37	49.29	0		2.2936	17.04	5.09	0.63	735954	1154			1	97	4054145	1265	10.07	127.41	1	97	546011	7310	9.06	662.09	1	74	15648	165340	6.22	10289.4
2011	GA	Georgia	2011_GA	481215	10.2	9803630	1	0	49085.4	45.02	3.467	4	55.64	0		2.30892	22.7589	4.65243	0.759496					1	97	4056147	1186	11.05	131.15	1	97	548674	7128	9.87	703.41	1	74	16241	161736	6.6	10673
2012	GA	Georgia	2012_GA	489027	9.2	9903580	1	0	49378.8	45.77	3.58	2.75	54.99	0		2.32424	23.492	3.50382	0.754422					1	75	4071478	1098.29	11.1746	122.73	1	74	547610	6990.55	9.5784	669.583	1	61	17335	150104	5.97732	8972.18
2013	GA	Georgia	2013_GA	499900	8.2	9975592	1	0	50112.3	45.02	3.483	3.73	51.99	0	2.75	2.30892	23.39	4.40433	0.731001					1	75	4101351	1087.94	11.4592	124.669	1	74	554350	6817.77	9.98657	680.861	1	60	18981	138048	6.27302	8659.77
2014	GA	Georgia	2014_GA	517512	7.1	10071204	1	0	51385.3	45.67	3.117	4.37	46.16	0	2.91	2.3222	21.96	4.86	0.685487				340652	1	74	4137057	1151.53	11.6491	134.143	1	74	552712	7027.21	10.3566	727.779	1	60	20300	130744	6.64275	8684.97
2015	GA	Georgia	2015_GA	540108	6	10183353	1	0	53038.4	42.6	1.822	2.62	44.13	0		2.25949	12.0877	3.17	0.669639					1	74	4191209	1121.83	11.5402	129.461	1	74	560950	7004.68	9.88867	692.67	1	59	20685	129459	5.87232	7602.27
2016	GA	Georgia	2016_GA	561718	5.4	10308442	1	0	54491.1	40.39	1.702	2.52	42.43	0		2.21434	11.3093	2.99	0.81					1	75	4240421	1137.65	11.5034	130.868	1	74	567431	7014.33	9.81456	688.426	1	60	21774	123581	5.8351	7211.05
2017	GA	Georgia	2017_GA	583543	4.7	10417031	1	0	56018.2	39.08	2.23	2.99	38.8	0		2.18759	14.7344	3.72435	0.628028			381812		1	74	4296977	1062.21	11.8982	126.384	1	74	572861	6730.17	10.0879	678.933	1	60	23108	116304	5.95842	6929.89
2018	GA	Georgia	2018_GA	600935	3.9	10519389	1	0	57126.4	39.08	2.6	3.15	38.81	0		2.75	17.1346	3.9	0.79	331720	2501			1	75	4354021	1142	11.47	131.05	1	74	579468	6803.9	9.79266	666.282	1	61	23065	118129	6	7092.92
2019	GA	Georgia	2019_GA	620792		10628020	1	0	58410.9	38.52	2.449	2.56	35.59	0		2.17615	14.98	3.32923	0.77					1	94	4411521	1121	11.76	131.84	1	94	585573	6747	10.02	676.25	1	74	23539	114680	6.17078	7076.64
2020	GA	Georgia	2020_GA	602322			1	0		36.13	1.891	2.03	33.27	0		2.12733	12.5353	2.32	0.584856					1	1	4487431	1081.17	12.0162	129.916	1	57	592220	6233.82	10.0815	628.462	1	44	23822	107771	5.7693	6217.6
2006	HI	Hawaii	2006_HI	74892.9	2.6	1309731	1	0	57181.9	41.9669	2.137	6.73	18.61	0		1.68	15.42	7.16101	0.470406	14465	14236			3	4	401592	660.378	23.3467	154.177	3	4	61334	4741.43	21.4229	1015.75	3	4	689	471184	17.9569	84610.1
2007	HI	Hawaii	2007_HI	76434.1	2.8	1315675	1	0	58095	41.9669	2.286	6.97	32.78	0		1.85	16.19	7.38155	0.58103	15313	13377			3	4	407146	655	24.1217	158.02	3	4	62001	4731	21.9077	1036.55	3	4	682	472182	18.3775	86775.5
2008	HI	Hawaii	2008_HI	76830.2	4.3	1332213	1	0	57671.1	40.69	2.983	8.86	45.88	0		2.19	22.86	9.11825	0.683301	15784	12712			3	4	409668	628	32.4963	203.94	3	4	61684	4729	29.722	1405.68	3	4	673	471061	26.0479	122701
2009	HI	Hawaii	2009_HI	74118.5	7.2	1346717	1	0	55036.4	43.33	2.141	3.94	45.86	0		2.24	13.73	4.5973	0.683145	15049	12999			3	4	412843	617	24.2	149.25	3	4	60869	4638	21.86	1013.94	3	4	688	446088	18.14	80927.5
2010	HI	Hawaii	2010_HI	77174.2	6.9	1364004	1	0	56579.2	44.27	2.705	4.37	49.29	0		2.22	17.45	4.99242	0.709922	15702	12971			3	4	414568	601	28.1	168.86	3	4	60479	4622	25.93	1198.48	3	4	686	446123	21.94	97901.5
2011	HI	Hawaii	2011_HI	77174.2	6.8	1379562	1	0	55941.1	45.02	3.467	4	55.64	0		2.30892	22.7589	4.65243	0.759496					3	4	417531	585	34.68	202.72	3	4	60043	4675	32.37	1513.39	3	4	698	437533	28.4	124260
2012	HI	Hawaii	2012_HI	78694	6	1395199	1	0	56403.4	45.77	3.58	2.75	54.99	0		2.32424	23.492	3.50382	0.754422	15432				3	4	419612	544.014	37.3433	203.153	3	4	60109	4489.32	34.8821	1565.97	3	4	706	432210	30.8211	133212
2013	HI	Hawaii	2013_HI	80534.9	4.9	1408822	1	0	57164.7	45.02	3.483	3.73	51.99	0		1.96	22.8627	4.40433	0.731001					3	4	422386	514.706	36.9849	190.363	3	4	60467	4508.24	34.0536	1535.22	3	4	694	435052	29.8692	129946
2014	HI	Hawaii	2014_HI	81304.9	4.4	1415335	1	0	57445.7	45.67	3.117	4.37	46.16	0		2.49	22.98	4.99242	0.685487	15873	11845			3	4	425168	506.421	37.0417	187.587	3	4	60679	4397.32	34.2133	1504.47	3	4	716	429444	30.2171	129766
2015	HI	Hawaii	2015_HI	83857.6	3.6	1422999	1	0	58930.2	42.6	1.822	2.62	44.13	0		3.27	14.21	3.38436	0.669639					3	4	428339	513.872	29.6023	152.118	3	4	60631	4363.09	26.9271	1174.85	3	4	740	416166	23.057	95955.2
2016	HI	Hawaii	2016_HI	85670.4	3	1428885	1	0	59956.1	40.39	1.702	2.52	42.43	0		2.21434	11.3093	3.29247	0.656367					3	13	430941	505.043	27.468	138.725	3	4	60836	4261.84	24.6426	1050.23	3	4	801	387264	20.6947	80143.3
2017	HI	Hawaii	2017_HI	87436.4	2.4	1425763	1	0	61326	39.08	2.23	2.99	38.8	0		3.08	13.71	3.72435	0.628028		12053			3	4	432952	506.153	29.5037	149.334	3	4	61236	4193.66	26.7735	1122.79	3	4	782	385005	22.92	88243.2
2018	HI	Hawaii	2018_HI	88836.4	2.4	1423102	1	0	62424.5	39.08	2.6	3.15	38.81	0	11.87	3.28	16.98	3.87138	0.628106	14367				3	13	436266	518	32.47	168.13	3	4	59661	4236.45	29.8983	1266.62	3	4	814	367880	26.1	96027.2
2019	HI	Hawaii	2019_HI	88945.3		1415615	1	0	62831.6	38.52	2.449	2.56	35.59	0		2.17615	15.83	3.32923	0.602968					3	4	438352	525	32.06	168.21	3	4	59878	4256	29.23	1243.95	3	4	823	368089	25.7554	94802.7
2020	HI	Hawaii	2020_HI	79592.5			1	0		36.13	1.891	2.03	33.27	0		2.12733	12.5353	2.84222	0.584856		12633			1	1	442002	537.161	30.2821	162.664	3	4	59734	3744.8	28.4069	1063.78	3	4	816	333267	24.4516	81489
2006	IA	Iowa	2006_IA	155704	3.7	2982644	0	0	52203.5	41.9669	2.137	6.73	18.61	0		1.03	15.32	7.16101	0.470406				53171	3	183	1313858	846.382	9.63164	81.5205	3	176	206821	4698.23	7.29225	342.607	3	104	5790	263837	4.92146	12984.6
2007	IA	Iowa	2007_IA	162838	3.7	2999212	0	0	54293.6	41.9669	2.286	6.97	32.78	0		1.06	17.45	7.38155	0.58103				47398	3	183	1323176	886	9.44609	83.65	3	177	209108	4816	7.10586	342.21	3	105	5941	268261	4.73768	12709.3
2008	IA	Iowa	2008_IA	160469	4.2	3016734	0	0	53193	40.69	2.983	8.86	45.88	0		1.18	22.19	9.11825	0.683301				55210	3	183	1325990	884	9.49046	83.94	3	178	211241	4804	7.18372	345.11	3	107	6187	259106	4.80757	12456.7
2009	IA	Iowa	2009_IA	156737	6.4	3032870	0	0	51679.5	43.33	2.141	3.94	45.86	0	1.26	1.23	13.32	4.5973	0.683145				48937	3	183	1324182	864	9.99	86.25	3	178	215993	4516	7.55	341.16	3	108	6608	229664	5.27	12113
2010	IA	Iowa	2010_IA	164559	6	3050819	0	0	53939.4	44.27	2.705	4.37	49.29	0	1.42	1.33	16.56	4.99242	0.709922					3	182	1327896	913	10.42	95.19	3	177	217704	4603	7.91	364.23	3	108	6555	239831	5.36	12857.1
2011	IA	Iowa	2011_IA	164559	5.5	3066772	0	0	53658.8	45.02	3.467	4	55.64	0	1.48	1.43	22.91	5.44	0.7		911			3	182	1329905	898	10.46	93.94	3	178	219229	4595	7.85	360.85	3	108	7378	217315	5.21	11326.9
2012	IA	Iowa	2012_IA	170924	5	3076844	0	0	55551.6	45.77	3.58	2.75	54.99	0	1.56	1.48	22.91	3.76	0.77	354097	1174	16868	45552	3	94	1334596	873.399	10.8194	94.4965	3	91	221154	4600.79	8.00742	368.405	3	70	7255	224118	5.29526	11867.6
2013	IA	Iowa	2013_IA	171069	4.7	3093935	0	0	55291.8	45.02	3.483	3.73	51.99	0		2.30892	22.54	4.61	0.84			12364		3	93	1343500	909.038	11.0453	100.406	3	89	222239	4671.82	8.43954	394.28	3	69	8413	194566	5.6243	10943
2014	IA	Iowa	2014_IA	180310	4.2	3110643	0	0	57965.5	45.67	3.117	4.37	46.16	0		2.3222	21.66	4.99242	0.685487				43431	3	92	1348641	891.427	11.1602	99.4851	3	90	224187	4586.61	8.67421	397.852	3	70	7399	230168	5.71	13142.6
2015	IA	Iowa	2015_IA	185989	3.8	3122541	0	0	59563.4	42.6	1.822	2.62	44.13	0	1.58	1.62	12.0877	3.38436	0.669639		544		54836	3	93	1356600	846.868	11.6344	98.5276	3	91	227544	4421.04	8.91939	394.33	3	70	7645	232060	5.89558	13681.3
2016	IA	Iowa	2016_IA	186730	3.6	3133210	0	1	59597	40.39	1.702	2.52	42.43	0		1.59	11.3093	3.29247	0.656367	249619	945			3	94	1358902	864.281	11.9375	103.174	3	90	235813	4343.6	9.16739	398.195	3	73	7724	237854	6.04845	14386.5
2017	IA	Iowa	2017_IA	187125	3.1	3143734	0	1	59523.2	39.08	2.23	2.99	38.8	0		2.18759	14.7344	3.72435	0.76				54528	3	91	1375599	831.266	12.3367	102.551	3	88	237942	4249.99	9.4638	402.211	3	72	7747	248108	6.20724	15400.6
2018	IA	Iowa	2018_IA	189245	2.5	3149900	0	1	60079.7	39.08	2.6	3.15	38.81	0		1.63	16.27	3.87138	0.75	279344	747			3	93	1385756	892	12.24	109.27	3	89	239722	4317.84	9.68489	418.178	3	74	7890	252985	6.45	16328.8
2019	IA	Iowa	2019_IA	188318		3159596	0	1	59602.1	38.52	2.449	2.56	35.59	0		2.17615	16.1551	3.32923	0.602968					3	181	1392979	867	12.46	108.04	3	175	241734	4244	9.99	424.12	3	110	8565	235831	6.59958	15563.9
2020	IA	Iowa	2020_IA	187137			0	1		36.13	1.891	2.03	33.27	0		2.12733	12.5353	2.84222	0.584856					1	1	1403386	865.02	12.4594	107.777	3	22	243762	3967.58	9.9579	395.088	3	21	9507	214462	6.42678	13783
2006	ID	Idaho	2006_ID	60738.6	3.5	1468669	0	0	41356.2	41.9669	2.137	6.73	18.61	0	5.68	2.24655	15.99	7.16101	0.470406		2			3	30	628199	1068.86	6.2084	66.359	3	27	92585	5232.33	5.15613	269.785	3	23	25677	28855.4	3.60567	1040.43
2007	ID	Idaho	2007_ID	61812.1	3.1	1505105	0	1	41068.3	41.9669	2.286	6.97	32.78	0	5.98	2.24655	17.72	7.38155	0.58103		1			3	30	644645	1078	6.35933	68.56	3	27	96345	5202	5.14041	267.42	3	24	25722	30458	3.87299	1179.62
2008	ID	Idaho	2008_ID	63878.2	5.1	1534320	0	1	41632.9	40.69	2.983	8.86	45.88	0	7.81	2.22047	23.55	9.11825	0.683301		1			3	30	654545	1087	6.99154	76.01	3	27	99003	5091	5.72304	291.37	3	25	26210	29611	4.48457	1327.91
2009	ID	Idaho	2009_ID	61276.1	8.8	1554439	0	1	39420.1	43.33	2.141	3.94	45.86	0	6	2.2744	14.09	4.5973	0.683145					3	31	659776	1080	7.8	84.27	3	27	100210	4994	6.49	323.89	3	25	26570	25702	5.17	1329.45
2010	ID	Idaho	2010_ID	62704	9	1570819	0	1	39918	44.27	2.705	4.37	49.29	0	5.8	2.2936	17.7	4.99242	0.709922		1			3	31	664717	1020	7.99	81.46	3	28	101268	4826	6.64	320.43	3	23	26047	28142	5.15	1448.36
2011	ID	Idaho	2011_ID	62704	8.3	1584272	0	1	39579.1	45.02	3.467	4	55.64	0	6.05	2.30892	23.65	4.65243	0.759496					3	31	667243	1048	7.87	82.5	3	28	101424	4905	6.41	314.63	3	23	26258	28285	5.1	1443.12
2012	ID	Idaho	2012_ID	62007.3	7.2	1595910	0	1	38853.9	45.77	3.58	2.75	54.99	0	3.95	2.32424	24.39	4.2	0.754422			13761		3	18	673368	1009.77	8.66713	87.5179	3	16	102319	4868.86	6.86384	334.19	3	14	26523	30082	5.4783	1647.98
2013	ID	Idaho	2013_ID	64769.8	6.1	1612053	0	1	40178.5	45.02	3.483	3.73	51.99	0	4.11	2.30892	22.8627	4.35	0.731001					3	18	680930	1054.84	9.32405	98.3538	3	17	103400	5037.31	7.3662	371.059	3	14	26846	28936.6	6.09859	1764.72
2014	ID	Idaho	2014_ID	66784.9	4.8	1632248	0	1	40915.9	45.67	3.117	4.37	46.16	0		2.3222	20.4885	4.99242	0.685487		1			3	17	690277	982.083	9.72474	95.505	3	16	104463	4888.42	7.77559	380.104	3	14	27127	27557	6.39753	1762.97
2015	ID	Idaho	2015_ID	67790.5	4.2	1652495	0	1	41023.1	42.6	1.822	2.62	44.13	0	2.81	2.25949	12.0877	3.38436	0.669639					3	17	701447	956.914	9.92837	95.006	3	16	106451	4903.38	7.7997	382.449	3	13	27531	26456.5	6.59548	1744.93
2016	ID	Idaho	2016_ID	70442.5	3.8	1684036	0	1	41829.6	40.39	1.702	2.52	42.43	0		2.21434	11.3093	3.29247	0.656367					3	18	714365	953.297	9.95466	94.8974	3	16	107551	4865.23	7.75717	377.404	3	14	27847	25771.2	6.54941	1687.86
2017	ID	Idaho	2017_ID	72935.1	3.2	1719745	0	1	42410.4	39.08	2.23	2.99	38.8	0		2.18759	14.7344	3.72435	0.628028					3	17	727568	999.666	10.041	100.376	3	16	108965	4910.6	7.98417	392.07	3	13	28138	25602.6	6.66055	1705.28
2018	ID	Idaho	2018_ID	77652.1	2.8	1752074	0	1	44320.1	39.08	2.6	3.15	38.81	0		2.18759	18.21	3.87138	0.628106					3	18	743567	944	10.15	95.84	3	16	110797	4841.36	7.93137	383.986	3	13	28418	26066	6.47	1686.86
2019	ID	Idaho	2019_ID	81261.3		1789060	0	1	45421.2	38.52	2.449	2.56	35.59	0		2.17615	16.1551	3.32923	0.602968			32011		3	30	763841	949	9.89	93.83	3	28	112137	4787	7.67	367.03	3	23	28493	25876.2	6.08111	1573.56
2020	ID	Idaho	2020_ID	82818.6			0	1		36.13	1.891	2.03	33.27	0		2.12733	12.5353	2.84222	0.584856					1	1	782559	955.28	9.9487	95.0379	3	13	114707	4584.09	7.74899	355.221	3	11	28759	26602.3	6.2298	1657.27
2006	IL	Illinois	2006_IL	759826	4.5	12643955	0	0	60094	41.9669	2.137	6.73	18.61	0	0.96	1.25	14.1311	7.16101	0.470406		1160	43690		8	76	5020608	769.852	8.42407	64.8529	8	75	568400	7423.02	7.94995	590.126	8	53	6513	574702	4.68853	26945.1
2007	IL	Illinois	2007_IL	769572	5	12695866	0	0	60615.9	41.9669	2.286	6.97	32.78	0	1.09	1.33	15.0977	7.38155	0.58103		1507	63987		8	76	5065123	790	10.1242	80.01	8	75	579121	7489	8.57274	642	8	55	5889	642869	6.60649	42471.1
2008	IL	Illinois	2008_IL	759095	6.3	12747038	0	0	59550.7	40.69	2.983	8.86	45.88	0	1.2	1.58	19.6192	9.11825	0.683301		1521	35245		6	74	5098579	765	11.0679	84.62	6	73	586611	7354	11.7903	867.11	6	52	6016	630308	4.54279	28633.5
2009	IL	Illinois	2009_IL	740794	10.2	12796778	0	0	57889.1	43.33	2.141	3.94	45.86	0	1.15	1.62	14.1571	4.5973	0.56		1314	33841		6	74	5074861	728	11.27	82.04	6	73	575801	7284	11.31	823.87	6	53	5893	586958	4.33	25400
2010	IL	Illinois	2010_IL	772226	10.4	12840545	0	0	60139.6	44.27	2.705	4.37	49.29	0	1.26	1.69	17.28	4.99242	0.65		1137	46576		4	72	5070056	799	11.52	92.03	4	71	578768	7406	8.88	657.52	4	53	5991	614535	6.82	41911.8
2011	IL	Illinois	2011_IL	772226	9.7	12867783	0	1	60012.3	45.02	3.467	4	55.64	0	1.3	1.72	23.09	5.15	0.69					4	72	5089449	770	11.78	90.8	4	71	587337	7161	8.64	618.78	4	52	5843	639570	6.42	41060.3
2012	IL	Illinois	2012_IL	790723	9	12883029	0	1	61377.1	45.77	3.58	2.75	54.99	0	1.39	1.93	24.35	3.25	0.75			90330		4	38	5098647	766.574	11.375	87.1978	4	36	590142	7174.53	7.98788	573.093	4	28	6042	624482	5.79778	36206.1
2013	IL	Illinois	2013_IL	795435	9	12895778	0	1	61681.8	45.02	3.483	3.73	51.99	0		1.88	23.49	4.82	0.81	912524		52996		4	38	5120607	754.667	10.6263	80.1933	4	36	596672	7049.2	8.14456	574.126	4	29	6498	569236	5.9428	33828.6
2014	IL	Illinois	2014_IL	811490	7.1	12885092	0	1	62979	45.67	3.117	4.37	46.16	0	1.46	1.99	22.36	6.02	0.77	905508			1023496	4	37	5145022	745.21	11.913	88.7772	4	36	600246	7027.6	9.26108	650.832	4	29	6098	605795	6.85149	41506
2015	IL	Illinois	2015_IL	825425	6	12859585	0	1	64187.5	42.6	1.822	2.62	44.13	0	1.35	1.92	14.05	3.71	0.72					4	37	5172653	719.258	12.5009	89.9136	4	36	603187	6951.94	9.02324	627.29	4	29	5997	599337	6.66673	39956.2
2016	IL	Illinois	2016_IL	826405	5.8	12821709	0	2	64453.6	40.39	1.702	2.52	42.43	0		1.97	11.3093	3.29247	0.656367					4	38	5231541	732.577	12.5352	91.8299	4	36	606954	6989.83	9.01928	630.432	4	29	6054	600591	6.50829	39088.2
2017	IL	Illinois	2017_IL	832827	4.9	12779893	0	2	65167	39.08	2.23	2.99	38.8	0	1.33	2.18759	14.7344	3.24	0.628028					4	37	5264333	692.038	12.9511	89.6268	4	36	611670	6810.3	9.08742	618.881	4	29	5693	628999	6.47461	40725.2
2018	IL	Illinois	2018_IL	851517	4.3	12724685	0	2	66918.5	39.08	2.6	3.15	38.81	0		2.18759	17.1346	3.37	0.72				1025651	4	40	5289573	744	12.77	94.98	4	36	616192	6865.13	9.12367	626.351	4	29	5717	643034	6.8	43713.8
2019	IL	Illinois	2019_IL	857985		12667017	0	2	67733.8	38.52	2.449	2.56	35.59	0		2.17615	16.1551	3.32923	0.67			176474		4	71	5314522	709	13.03	92.37	4	70	622802	6594	9.08	598.9	4	51	5737	628238	6.52426	40987.9
2020	IL	Illinois	2020_IL	810210			0	2		36.13	1.891	2.03	33.27	0		1.61	12.5353	2.84222	0.64					1	1	5339610	720.567	13.0429	93.9826	4	24	628868	6027.57	9.1468	551.33	4	22	5561	604840	6.697	40506.1
2006	IN	Indiana	2006_IN	312526	5	6332669	1	0	49351.3	41.9669	2.137	6.73	18.61	0	1.64	2.24655	14.1311	7.52	0.470406			27625		5	118	2710178	992.754	8.22462	81.6502	5	116	332336	5975.38	7.21342	431.029	6	88	19147	215568	4.94912	10668.7
2007	IN	Indiana	2007_IN	322662	4.6	6379599	1	0	50577.1	41.9669	2.286	6.97	32.78	0	1.78	2.24655	15.0977	7.37	0.58103			38416		5	118	2727752	1058	8.26147	87.44	5	116	336379	6136	7.29105	447.37	6	88	19684	211625	4.89063	10349.8
2008	IN	Indiana	2008_IN	322384	5.9	6424806	1	0	50178.1	40.69	2.983	8.86	45.88	0	2.15	2.22047	19.6192	9.48	0.683301			34798		5	118	2733128	1036	8.87401	91.94	5	117	341154	6002	7.81685	469.14	6	90	18099	222900	5.46124	12173.1
2009	IN	Indiana	2009_IN	299789	10.3	6459325	1	0	46411.8	43.33	2.141	3.94	45.86	0	2.11	2.2744	14.1571	4.63	0.683145			37034		5	118	2733611	992	9.5	94.3	5	117	341437	5782	8.32	481.01	6	91	18264	196448	5.81	11409.4
2010	IN	Indiana	2010_IN	321533	10.4	6490555	1	0	49538.6	44.27	2.705	4.37	49.29	0	2.28	2.2936	17.8158	4.87	0.709922			61761		5	118	2742789	1065	9.56	101.79	5	117	341727	5942	8.38	497.66	6	92	18796	206390	5.87	12123.5
2011	IN	Indiana	2011_IN	321533	9.1	6517250	1	0	49335.7	45.02	3.467	4	55.64	0		2.30892	22.7589	4.65243	0.759496					5	118	2744879	1030	10.06	103.54	5	117	343626	5847	8.77	513.04	6	91	17891	222524	6.17	13720.8
2012	IN	Indiana	2012_IN	323876	8.3	6538989	1	0	49530	45.77	3.58	2.75	54.99	0		2.32424	23.492	3.50382	0.754422					5	64	2755595	996.866	10.5265	104.935	5	62	344453	5811.65	9.14068	531.224	6	56	18525	216678	6.33844	13734
2013	IN	Indiana	2013_IN	333207	7.7	6570575	1	0	50712.1	45.02	3.483	3.73	51.99	0	2.66	2.30892	22.96	4.04	0.731001	984376	1420	82590		5	64	2771260	1004.56	10.994	110.441	5	62	346933	5825.33	9.60023	559.245	6	56	18162	219357	6.69666	14689.6
2014	IN	Indiana	2014_IN	343828	6	6596019	1	0	52126.6	45.67	3.117	4.37	46.16	0	2.76	2.3222	20.4885	4.99242	0.685487	1033621				5	62	2784660	1008.62	11.4575	115.563	5	61	348699	5766.58	9.9588	574.282	6	56	18106	225931	6.96597	15738.3
2015	IN	Indiana	2015_IN	341205	4.8	6611442	1	0	51608.3	42.6	1.822	2.62	44.13	0		2.32	12.0877	3.38436	0.669639					5	62	2804861	963.853	11.5687	111.505	5	61	350474	5711.71	9.77936	558.569	6	58	18213	219761	6.86019	15076
2016	IN	Indiana	2016_IN	348439	4.4	6637898	1	0	52492.4	40.39	1.702	2.52	42.43	0		2.21434	11.3093	2.92	0.656367	777846		182590		5	64	2821546	975.41	11.7861	114.962	5	61	350645	5758.15	10.0101	576.394	6	58	18085	213940	6.97326	14918.6
2017	IN	Indiana	2017_IN	357536	3.6	6662068	1	0	53667.4	39.08	2.23	2.99	38.8	0		2.18759	14.7344	3.72435	0.628028			139896		5	62	2834090	927.739	12.2919	114.037	5	61	352015	5600.37	10.5448	590.551	6	58	17917	203426	7.54057	15339.5
2018	IN	Indiana	2018_IN	368763	3.4	6698481	1	0	55051.7	39.08	2.6	3.15	38.81	0	2.35	2.18759	17.1346	3.87138	0.628106					5	64	2863358	1006	12.26	123.39	5	61	354730	5709.79	10.5984	605.146	6	58	17769	212523	7.38	15690.8
2019	IN	Indiana	2019_IN	371044		6731010	1	0	55124.6	38.52	2.449	2.56	35.59	0	2.26	2.17615	16.1551	2.59	0.602968					5	112	2887031	960	12.58	120.74	5	111	358791	5462	11.03	602.46	6	94	18805	200818	7.35872	14777.7
2020	IN	Indiana	2020_IN	359185			1	0		36.13	1.891	2.03	33.27	0		2.12733	12.5353	2.84222	0.584856					1	1	2920266	938.224	12.8262	120.338	5	44	363465	5043.24	11.2066	565.177	6	43	19383	181701	6.97945	12681.7
2006	KS	Kansas	2006_KS	136136	4.4	2762931	0	0	49272.2	41.9669	2.137	6.73	18.61	1	1.29	1.19	15.5	7.16101	0.470406	358530				6	154	1203783	934.739	8.2521	77.1356	6	152	217500	5665.27	6.96308	394.477	5	82	17680	54026.6	5.20059	2809.7
2007	KS	Kansas	2007_KS	143587	4.2	2783785	0	0	51579.6	41.9669	2.286	6.97	32.78	1		1.23	16.61	7.38155	0.58103	390566			108762	5	152	1250241	920	8.19304	75.4	5	150	230660	5591	6.82596	381.61	5	81	18303	49561	5.12836	2541.67
2008	KS	Kansas	2008_KS	147265	4.6	2808076	0	0	52443.4	40.69	2.983	8.86	45.88	1		1.41	22.2	9.11825	0.683301	367795				4	151	1203021	928	8.88337	82.41	4	149	219462	5832	7.42464	432.99	4	82	19554	45880	5.69122	2611.11
2009	KS	Kansas	2009_KS	141902	6.9	2832704	0	0	50094.4	43.33	2.141	3.94	45.86	1		1.43	12.83	4.5973	0.683145	353604				4	151	1209522	906	9.53	86.37	4	149	218800	5716	7.87	450.08	4	82	22873	36751	6.1	2243.07
2010	KS	Kansas	2010_KS	147837	7.1	2858266	0	0	51722.5	44.27	2.705	4.37	49.29	1	1.55	1.51	16.27	4.99242	0.709922	357256				4	151	1213036	985	10.03	98.73	4	149	220091	5844	8.25	481.9	4	82	23304	38086	6.23	2374.64
2011	KS	Kansas	2011_KS	147837	6.5	2869677	0	0	51516.9	45.02	3.467	4	55.64	1	1.8	1.75	22.21	4.71	0.69		498	31039		4	151	1215411	983	10.65	104.7	4	149	221844	5863	8.78	514.76	4	85	23986	37548	6.71	2519.88
2012	KS	Kansas	2012_KS	150077	5.7	2886024	0	0	52001.3	45.77	3.58	2.75	54.99	1		1.83	22.93	3.50382	0.7					4	67	1217256	944.52	11.2426	106.188	4	67	223822	5754.46	9.2356	531.458	4	58	25017	36778.7	7.08909	2607.27
2013	KS	Kansas	2013_KS	150703	5.3	2894306	0	0	52068.8	45.02	3.483	3.73	51.99	1	1.78	1.77	22.41	4.48	0.75			23713		4	67	1222985	926.218	11.6443	107.851	4	67	224515	5658.5	9.67886	547.679	4	59	26394	34759.7	7.39283	2569.72
2014	KS	Kansas	2014_KS	154110	4.5	2901861	0	0	53107.3	45.67	3.117	4.37	46.16	1		2.3222	20.4885	4.99242	0.685487				89512	4	66	1228858	928.026	12.1709	112.949	4	67	226043	5671.02	10.1296	574.452	4	59	26787	35757.1	7.79988	2789.01
2015	KS	Kansas	2015_KS	158603	4.2	2910717	0	0	54489.2	42.6	1.822	2.62	44.13	1		2.25949	12.07	3.38436	0.64		634		90254	4	66	1231830	895.8	12.344	110.577	4	67	228411	5611.35	10.0974	566.602	4	61	24155	38732.9	7.60826	2946.9
2016	KS	Kansas	2016_KS	164644	4	2912977	0	1	56520.8	40.39	1.702	2.52	42.43	1		2.21434	11.3093	3.29247	0.656367					4	68	1252846	898.57	13.059	117.344	4	68	232926	5683.99	10.472	595.228	4	62	23729	40083	7.4876	3001.25
2017	KS	Kansas	2017_KS	166274	3.7	2910892	0	2	57121.2	39.08	2.23	2.99	38.8	1	1.52	2.18759	14.7344	3.72435	0.628028			21276		4	66	1259226	861.205	13.3129	114.651	4	67	232078	5651.58	10.5939	598.723	4	61	24322	39522.1	7.54432	2981.67
2018	KS	Kansas	2018_KS	169797	3.4	2912748	0	3	58294.4	39.08	2.6	3.15	38.81	1		2.18759	16.5	3.22	0.628106	225138	681	29211		4	67	1266044	934	13.35	124.68	4	67	234091	5755.86	10.6572	613.414	4	60	24186	40271	7.6	3059.17
2019	KS	Kansas	2019_KS	170352		2912635	0	3	58487.1	38.52	2.449	2.56	35.59	1		2.17615	16.1551	3.32923	0.602968					4	146	1274955	891	12.71	113.26	4	143	235236	5638	10.29	580.21	4	88	24230	39938.9	7.3466	2934.15
2020	KS	Kansas	2020_KS	168541			0	3		36.13	1.891	2.03	33.27	1		2.12733	12.5353	2.84222	0.584856				110545	1	1	1282532	883.178	12.8533	113.517	4	21	236430	5231.75	10.404	544.312	4	22	23979	38395.3	7.29802	2802.1
2006	KY	Kentucky	2006_KY	186333	5.7	4219239	1	0	44162.6	41.9669	2.137	6.73	18.61	0		1.73	14.4	7.16101	0.470406	958508				4	59	1899764	1138.25	7.0207	79.9132	4	59	289117	5459.47	6.43514	351.324	4	51	6248	584900	4.04996	23688.2
2007	KY	Kentucky	2007_KY	185790	5.4	4256672	1	0	43646.8	41.9669	2.286	6.97	32.78	0		1.77	16.27	7.38155	0.58103	953699				4	59	1917257	1217	7.3406	89.35	4	59	293501	5688	6.75601	384.31	4	51	6239	592585	4.47214	26501.2
2008	KY	Kentucky	2008_KY	186516	6.4	4289878	1	0	43478.1	40.69	2.983	8.86	45.88	0		2.18	21.45	9.11825	0.683301	965722				4	59	1928082	1191	7.94459	94.64	4	59	296069	5536	7.28786	403.47	5	52	6304	610694	4.81507	29405.3
2009	KY	Kentucky	2009_KY	178113	10.3	4317074	1	0	41257.8	43.33	2.141	3.94	45.86	0		2.17	14.17	4.5973	0.683145	892391				4	58	1922294	1150	8.37	96.26	4	58	293614	5306	7.63	404.75	5	52	7056	514786	4.91	25300.4
2010	KY	Kentucky	2010_KY	188390	10.2	4348464	1	0	43323.3	44.27	2.705	4.37	49.29	0		2.26	16.55	4.99242	0.709922	958439				4	58	1930666	1258	8.57	107.77	4	58	297050	5445	7.88	429.12	5	52	7268	516217	5.05	26071
2011	KY	Kentucky	2011_KY	188390	9.4	4370817	1	0	43101.7	45.02	3.467	4	55.64	0		2.30892	23.03	4.65243	0.759496		1438	15860		4	58	1928523	1175	9.2	108.16	4	58	294450	5298	8.49	449.79	5	51	7426	489490	5.33	26104
2012	KY	Kentucky	2012_KY	192060	8.2	4387865	1	0	43770.7	45.77	3.58	2.75	54.99	0		2.32424	23.492	3.50382	0.754422					4	50	1924644	1129.94	9.42906	106.542	4	49	298211	5241.23	8.72913	457.514	5	47	7134	516259	5.35026	27621.2
2013	KY	Kentucky	2013_KY	196698	8	4406906	1	0	44634	45.02	3.483	3.73	51.99	0	2.43	2.36	22.61	5.74	0.731001					4	50	1935245	1153.52	9.79181	112.95	5	50	297108	5891.29	8.56021	504.307	4	46	7185	428805	5.66476	24290.8
2014	KY	Kentucky	2014_KY	196796	6.5	4416992	1	0	44554.3	45.67	3.117	4.37	46.16	0		2.34	21.42	6.02	0.685487					4	49	1939489	1177.28	10.1643	119.662	5	50	297182	5371.72	9.4379	506.978	4	46	7376	364726	5.67648	20703.6
2015	KY	Kentucky	2015_KY	199487	5.3	4429126	1	0	45039.8	42.6	1.822	2.62	44.13	0		2.25949	13.21	3.52	0.669639	769733	1405			4	49	1947068	1119.98	10.2428	114.717	5	51	299462	5451.22	9.4351	514.328	4	46	7392	341375	5.48473	18723.5
2016	KY	Kentucky	2016_KY	201007	5.1	4440306	1	0	45268.8	40.39	1.702	2.52	42.43	0		2.21434	11.3093	3.29247	0.656367					4	50	1957188	1121.44	10.4907	117.647	4	50	302040	5512.82	9.5711	527.638	4	46	7308	321953	5.66739	18246.3
2017	KY	Kentucky	2017_KY	203564	4.9	4455590	1	0	45687.3	39.08	2.23	2.99	38.8	0	2.2	1.99	12.78	3.64	0.628028	616889	1102			4	49	1971002	1052.03	10.8506	114.152	4	50	304457	5280.58	9.85056	520.167	4	46	7010	338318	5.71522	19335.6
2018	KY	Kentucky	2018_KY	205940	4.3	4464273	1	0	46130.7	39.08	2.6	3.15	38.81	0		1.96	17.1346	3.59	0.628106	635915				4	51	1980209	1166	10.6	123.57	4	51	305417	5451.7	9.73907	530.944	4	47	6750	357005	5.68	20279
2019	KY	Kentucky	2019_KY	211740		4472345	1	0	47344.2	38.52	2.449	2.56	35.59	0	2.16	2.17615	14.68	3.22	0.602968					4	58	1991137	1112	10.8	120.08	4	59	309830	5275	10.15	535.46	4	50	6147	395326	5.57051	22021.7
2020	KY	Kentucky	2020_KY	206289			1	0		36.13	1.891	2.03	33.27	0		2.12733	12.5353	2.84222	0.584856					1	1	2013910	1073.17	10.8672	116.623	4	47	312014	4823.86	10.3392	498.751	4	43	5982	387328	5.31265	20577.4
2006	LA	Louisiana	2006_LA	247140	4.5	4302665	1	0	57438.8	41.9669	2.137	6.73	18.61	0	3.16	1.77	10.27	7.16101	0.49					5	40	1857363	1261.32	9.13529	115.226	5	40	258698	7080.15	9.02531	639.061	5	29	20378	111938	6.87163	7691.98
2007	LA	Louisiana	2007_LA	234216	4.3	4375581	1	0	53528.1	41.9669	2.286	6.97	32.78	0	3.48	2.13	14.3	7.38155	0.55					5	40	1885657	1276	9.37333	119.62	5	40	261148	7303	9.12642	666.54	5	29	21336	108576	6.77273	7353.53
2008	LA	Louisiana	2008_LA	237062	4.9	4435586	1	0	53445.4	40.69	2.983	8.86	45.88	0	4.56	2.36	15.72	9.11825	0.5					5	39	1919826	1252	10.2843	128.77	5	39	265230	7207	10.1231	729.61	5	28	20299	110562	7.94126	8780.03
2009	LA	Louisiana	2009_LA	241869	6.8	4491648	1	0	53848.6	43.33	2.141	3.94	45.86	0	2.52	2.35	12.18	4.5973	0.6					5	39	1946996	1273	8.1	103.19	5	39	269166	7214	7.69	555.09	5	28	18534	115163	5.25	6050.34
2010	LA	Louisiana	2010_LA	241236	8	4544635	1	0	53081.5	44.27	2.705	4.37	49.29	0	2.83	2.4	17.8158	4.99242	0.75					5	39	1973174	1380	8.98	123.96	5	38	274177	7356	8.5	625.39	5	28	18128	129573	5.84	7568.84
2011	LA	Louisiana	2011_LA	241236	7.8	4576244	1	0	52714.8	45.02	3.467	4	55.64	0		2.30892	21.67	4.65243	0.759496			299598		5	38	1979175	1348	8.96	120.84	5	37	277004	7305	8.44	616.84	5	27	18090	138467	5.69	7880.02
2012	LA	Louisiana	2012_LA	242417	7.1	4602067	1	0	52675.6	45.77	3.58	2.75	54.99	0		2.32424	23.492	3.50382	0.754422					5	25	1995661	1253.83	8.37376	104.993	5	24	279613	7225.68	7.75367	560.255	5	20	18143	139856	4.75874	6655.37
2013	LA	Louisiana	2013_LA	236482	6.7	4626040	1	0	51119.8	45.02	3.483	3.73	51.99	0	2.73	2.9	21.99	3.87	0.91	225754				5	25	2011044	1272.52	9.42871	119.983	5	24	281835	7171.44	8.96332	642.799	5	20	19019	135099	5.92031	7998.3
2014	LA	Louisiana	2014_LA	243043	6.4	4645938	1	0	52313	45.67	3.117	4.37	46.16	0		2.3222	20.4885	4.99242	0.685487					5	24	2026223	1291.43	9.57136	123.607	5	24	297789	6854.06	9.1015	623.823	5	21	19553	147988	6.04746	8949.53
2015	LA	Louisiana	2015_LA	239584	6.3	4666998	1	0	51335.8	42.6	1.822	2.62	44.13	0		2.25949	12.53	3.38436	0.8				160015	5	24	2043760	1286.24	9.3313	120.023	5	24	298170	6986	8.66484	605.325	5	21	19646	148984	5.41208	8063.11
2016	LA	Louisiana	2016_LA	235554	6.1	4681346	1	0	50317.6	40.39	1.702	2.52	42.43	0	2.12	2.21434	11.3093	2.68	0.58					4	26	2059699	1240.07	9.33754	115.792	4	23	289780	7159.37	8.59337	615.231	4	20	19231	155542	5.07619	7895.59
2017	LA	Louisiana	2017_LA	239831	5.1	4673673	1	0	51315.3	39.08	2.23	2.99	38.8	0	2.48	2.18759	14.7344	3.72435	0.628028					4	23	2073615	1186.81	9.73507	115.537	4	23	291404	7006.41	8.94886	626.994	4	20	19611	157907	5.47865	8651.19
2018	LA	Louisiana	2018_LA	245220	4.9	4664450	1	0	52572.2	39.08	2.6	3.15	38.81	0		3.12	15.18	3.87138	0.628106					4	26	2085055	1282	9.59	122.86	4	23	292752	7028.39	8.84915	621.953	4	21	19558	159426	5.35	8532.31
2019	LA	Louisiana	2019_LA	246361		4658285	1	0	52886.7	38.52	2.449	2.56	35.59	0	2.23	3.11	14.61	2.7	0.64	87487	280	352107	145993	4	36	2095466	1232	9.8	120.7	4	35	295153	6856	8.91	610.86	4	28	19373	162797	5.22934	8513.19
2020	LA	Louisiana	2020_LA	228825			1	0		36.13	1.891	2.03	33.27	0	1.91	4.79	9.15	2.84222	0.55	45378	81	365391	177055	1	1	2112928	1200.58	9.66793	116.071	4	20	296222	6301.22	8.8514	557.746	4	19	19276	156829	4.88043	7653.93
2006	MA	Massachusetts	2006_MA	426926	4.9	6410084	0	1	66602.3	41.9669	2.137	6.73	18.61	1		2.24655	13.98	7.16101	0.41					7	47	2610734	626.402	16.5984	103.973	7	48	374294	5841.43	15.5418	907.861	7	43	14072	56865	13.0397	7415.03
2007	MA	Massachusetts	2007_MA	440374	4.6	6431559	0	1	68470.8	41.9669	2.286	6.97	32.78	1		2.24655	15.91	7.38155	0.57					5	45	2642144	635	16.2318	103.09	5	46	378830	5972	15.2016	907.83	5	41	13950	56452	13.0255	7353.11
2008	MA	Massachusetts	2008_MA	447527	5.5	6468967	0	1	69180.6	40.69	2.983	8.86	45.88	1		2.22047	14.44	9.11825	0.48					5	45	2647529	618	17.6815	109.3	5	45	379987	5830	15.8038	921.31	5	41	14066	55284	14.8536	8211.72
2009	MA	Massachusetts	2009_MA	441308	8.1	6517613	0	1	67710	43.33	2.141	3.94	45.86	1		3.48	11.81	4.5973	0.57					5	45	2661985	610	16.87	102.85	5	45	375507	3945	15.37	606.47	5	41	16173	86328	14.08	12158.2
2010	MA	Massachusetts	2010_MA	472664	8.3	6566440	0	1	71981.8	44.27	2.705	4.37	49.29	1		2.2936	15.79	4.99242	0.65				61853	5	45	2674717	667	14.59	97.34	5	45	379709	4004	14.53	581.81	5	41	16162	88253	13.71	12102.2
2011	MA	Massachusetts	2011_MA	472664	7.3	6614218	0	1	71461.9	45.02	3.467	4	55.64	1	4.29	3.68	22.7589	4.88	0.7					5	45	2693548	633	14.67	92.92	5	45	389864	3798	14.33	544.37	5	40	21021	67288	13.38	9000.45
2012	MA	Massachusetts	2012_MA	483286	6.7	6664269	0	1	72519	45.77	3.58	2.75	54.99	1	3.04	3.59	23.45	3.55	0.77					5	31	2699141	627.158	14.9127	93.5264	5	30	389272	3794.01	13.8415	525.148	5	30	21145	66710.8	12.5666	8383.31
2013	MA	Massachusetts	2013_MA	486992	6.7	6715158	0	1	72521.3	45.02	3.483	3.73	51.99	1		4.21	21.91	4.40433	0.84		1479			5	31	2708759	637.673	15.8343	100.971	5	31	391856	3766.92	14.2348	536.215	5	31	16594	82677.2	13.1762	10893.7
2014	MA	Massachusetts	2014_MA	496251	5.7	6764864	0	1	73357.1	45.67	3.117	4.37	46.16	1		4.27	20.4885	4.99242	0.8	28327			60340	5	30	2720128	614.896	17.391	106.936	5	30	398717	5450.02	14.6764	799.868	5	30	14896	44536.2	12.7405	5674.13
2015	MA	Massachusetts	2015_MA	514399	4.8	6797484	0	2	75674.9	42.6	1.822	2.62	44.13	1	3.65	3.47	22	4.21	0.71		1995	161256		5	29	2794918	601.548	19.8263	119.265	5	29	407063	5363.69	15.7853	846.673	5	29	14100	46644	13.5442	6317.53
2016	MA	Massachusetts	2016_MA	521663	3.9	6827280	0	2	76408.6	40.39	1.702	2.52	42.43	1		2.21434	9.64	3.29247	0.656367					5	40	2740865	598.743	19.0011	113.768	5	30	402936	5363.51	15.6002	836.719	5	30	13675	45748.8	13.3762	6119.47
2017	MA	Massachusetts	2017_MA	530129	3.8	6863560	0	2	77238.3	39.08	2.23	2.99	38.8	1	3.06	2.18759	14.55	3.72435	0.76	12304	999			5	30	2766154	582.572	20.0597	116.862	5	30	409715	5281.73	15.935	841.643	5	29	10358	55184.5	13.8834	7661.51
2018	MA	Massachusetts	2018_MA	549262	3.3	6885720	0	2	79768.3	39.08	2.6	3.15	38.81	1		2.18759	16.01	3.87138	0.75			137982		4	38	2784243	607	21.61	131.2	4	29	408972	5288.15	17.1721	908.089	4	28	10503	53154	14.89	7915.19
2019	MA	Massachusetts	2019_MA	566706		6894883	0	2	82192.3	38.52	2.449	2.56	35.59	1		2.17615	16.1551	3.32923	0.602968					4	44	2802099	574	21.92	125.89	4	44	410995	5137	16.8	862.83	4	39	11020	47956	14.7564	7076.57
2020	MA	Massachusetts	2020_MA	556196			0	2		36.13	1.891	2.03	33.27	1		2.12733	12.5353	2.84222	0.584856					1	1	2817549	601.74	21.9657	132.176	4	21	411448	4682.75	16.0331	750.789	4	20	10877	47657	14.5063	6913.25
2006	MD	Maryland	2006_MD	329874	3.9	5627367	0	0	58619.6	41.9669	2.137	6.73	18.61	1		2.27	14.1311	7.16101	0.52					4	12	2141929	1046.77	9.71399	101.684	4	12	236610	10470.5	10.5638	1106.08	3	8	8363	60355.4	8.13887	4912.25
2007	MD	Maryland	2007_MD	331764	3.5	5653408	0	0	58683.8	41.9669	2.286	6.97	32.78	1		2.12	15.0977	7.38155	0.46					4	12	2163625	1086	11.8928	129.15	4	12	239024	10700	11.5774	1238.8	3	8	8586	58044	9.41454	5464.54
2008	MD	Maryland	2008_MD	338165	4.2	5684965	0	0	59484.2	40.69	2.983	8.86	45.88	1		3.71	19.6192	9.11825	0.48					4	12	2178595	1038	13.8392	143.69	4	12	241356	10359	12.7587	1321.7	3	8	8733	53914	10.3725	5592.2
2009	MD	Maryland	2009_MD	336286	7	5730388	0	0	58684.6	43.33	2.141	3.94	45.86	1	2.3	3.03	14.1571	4.5973	0.683145					4	12	2188390	1026	14.98	153.72	4	12	242640	10237	11.97	1225.27	4	9	8773	50209	9.92	4978.5
2010	MD	Maryland	2010_MD	360156	7.7	5788784	0	1	62216.2	44.27	2.705	4.37	49.29	1	2.76	3.47	17.8158	4.99242	0.709922					4	12	2200368	1096	14.32	156.94	4	12	244264	10498	11.75	1233.62	4	9	8766	48322	9.57	4625.39
2011	MD	Maryland	2011_MD	360156	7.2	5840241	0	2	61668	45.02	3.467	4	55.64	1		2.30892	21.93	4.65243	0.759496		2007			4	12	2208015	1030	13.31	137.17	4	12	245003	10459	11.28	1179.53	4	9	8900	46886	8.76	4108.44
2012	MD	Maryland	2012_MD	361562	7	5888375	0	2	61402.6	45.77	3.58	2.75	54.99	1		2.32424	23.492	3.50382	0.754422					4	10	2212287	1004.92	12.8366	128.998	4	9	246868	10163.2	10.4336	1060.38	4	6	8941	41940	8.09086	3393.31
2013	MD	Maryland	2013_MD	364633	6.6	5925197	0	2	61539.4	45.02	3.483	3.73	51.99	1	2.52	3.43	22.83	4.79	0.77	167590		25948	149048	4	10	2218948	1030.83	13.2543	136.63	4	10	247168	10103.2	10.6843	1079.46	4	7	8788	37398.9	8.36437	3128.19
2014	MD	Maryland	2014_MD	370344	5.8	5960064	0	2	62137.6	45.67	3.117	4.37	46.16	1		2.3222	22.19	5.1	0.72	185394	3748		150017	4	9	2234962	1024.91	13.6284	139.679	4	9	248362	10000.3	11.1547	1115.5	4	6	8780	36522	9.03577	3300.04
2015	MD	Maryland	2015_MD	378746	5.1	5988528	0	2	63245.2	42.6	1.822	2.62	44.13	1		2.25949	14.57	3.38436	0.72		1749			4	9	2255556	1012.44	13.819	139.909	4	9	249181	10019.2	11.0006	1102.17	4	6	8821	36686.3	8.52847	3128.78
2016	MD	Maryland	2016_MD	391951	4.5	6007014	0	3	65248.9	40.39	1.702	2.52	42.43	1		2.21434	11.3093	2.82	0.656367		1715		154377	4	17	2288301	994.802	14.2272	141.533	4	9	250939	9854.98	10.9921	1083.27	4	6	8822	36098	7.88673	2846.95
2017	MD	Maryland	2017_MD	399714	4.3	6028186	0	3	66307.6	39.08	2.23	2.99	38.8	1		2.18759	14.7344	3.72435	0.71	94697			158004	4	9	2313189	939.69	13.9578	131.16	4	9	252966	9518.09	10.7519	1023.38	4	6	8754	36153.2	8.37041	3026.17
2018	MD	Maryland	2018_MD	402481	3.9	6042153	0	3	66612.2	39.08	2.6	3.15	38.81	1		2.53	16.07	3.86	0.68	112277	2565	101314	156699	4	16	2332517	1005	13.3	133.68	4	9	254163	9687.85	10.4324	1010.68	4	6	8801	36645	8.23	3014.83
2019	MD	Maryland	2019_MD	402346		6054954	0	3	66449.1	38.52	2.449	2.56	35.59	1	1.88	2.17615	16.1551	3.32923	0.65				156765	4	12	2352535	975	13.12	127.92	4	12	256165	9399	9.97	936.75	4	9	8935	34680.2	7.79963	2704.93
2020	MD	Maryland	2020_MD	388532			0	3		36.13	1.891	2.03	33.27	1		2.12733	12.5353	2.84222	0.584856					1	1	2376983	957.319	13.0053	124.502	4	9	256738	8585.88	9.72389	834.882	4	6	8966	31432.6	7.80955	2454.74
2006	ME	Maine	2006_ME	59986	4.6	1323619	0	0	45319.7	41.9669	2.137	6.73	18.61	1	6.3	2.24655	14.06	7.06	0.470406		98	42588		1	7	685425	528.996	13.8014	73.0088	1	7	86406	3986.9	12.4248	495.364	0	4	2825	112089	8.83121	9898.82
2007	ME	Maine	2007_ME	60032.6	4.7	1327040	0	0	45238	41.9669	2.286	6.97	32.78	1	6.94	2.24655	15.77	7.67	0.58103		150	35835		1	7	694235	530	16.5232	87.53	1	7	87565	3993	12.9428	516.74	0	4	2820	96093	14.105	13554
2008	ME	Maine	2008_ME	59845.1	5.5	1330509	0	0	44979.1	40.69	2.983	8.86	45.88	1	7.29	2.22047	19.91	9.86	0.683301		87	38703		1	7	695368	521	16.1983	84.47	1	7	87761	3939	12.976	511.07	0	4	2827	93578	11.704	10952.3
2009	ME	Maine	2009_ME	58771.8	8.1	1329590	0	0	44202.9	43.33	2.141	3.94	45.86	1	4.63	2.2744	12.73	4.7	0.683145		70	38543		1	7	696822	521	15.65	81.6	1	7	87923	3859	12.55	484.06	0	3	2857	83185	9.95	8277.7
2010	ME	Maine	2010_ME	59429.7	8.1	1327651	0	0	44763	44.27	2.705	4.37	49.29	1	5.23	3.45	16.48	5.19	0.709922		81	42371		1	7	699625	521	15.71	81.83	1	7	88266	3872	12.51	484.48	1	3	2821	90359	9.17	8283.87
2011	ME	Maine	2011_ME	59429.7	7.9	1328473	0	0	44735.3	45.02	3.467	4	55.64	1		2.30892	22.15	4.81	0.759496		40			1	7	701335	521	15.38	80.09	1	7	88791	3771	12.29	463.51	1	3	2823	89023	8.88	7908.07
2012	ME	Maine	2012_ME	59181.7	7.5	1328094	0	0	44561.4	45.77	3.58	2.75	54.99	1		2.32424	23.492	3.55	0.754422					1	5	703770	530.563	14.6588	77.7742	1	4	89048	3793.07	11.5274	437.244	1	2	2780	90741.5	7.98195	7242.94
2013	ME	Maine	2013_ME	59013.9	6.6	1328543	0	0	44420	45.02	3.483	3.73	51.99	1		4.21	22	5.83	0.731001	967	39	21362		1	5	704775	551.276	14.354	79.1301	1	4	89336	3745.79	11.7407	439.783	1	2	2962	89386.1	8.34089	7455.59
2014	ME	Maine	2014_ME	59589.8	5.6	1331217	0	0	44763.4	45.67	3.117	4.37	46.16	1	6.97	4.27	20.01	6.51	0.685487	1328		24397		1	4	706952	549.378	15.273	83.9064	1	4	91541	3627.31	12.7027	460.765	1	2	3023	92553.9	8.94751	8281.27
2015	ME	Maine	2015_ME	60563	4.4	1329098	0	1	45567	42.6	1.822	2.62	44.13	1	5.39	3.47	16.73	3.38436	0.669639	1846	242	18398		2	7	699241	555.638	15.6129	86.7515	2	7	97057	3449.71	12.4731	430.286	2	6	2993	89320.8	9.05099	8084.41
2016	ME	Maine	2016_ME	62037.1	3.8	1332348	0	1	46562.2	40.39	1.702	2.52	42.43	1		4.07	11.3093	3.22	0.656367		28	22833		2	8	699321	546.462	15.8258	86.4822	2	7	97949	3391.64	12.0844	409.858	2	6	3028	79167.7	8.95916	7092.76
2017	ME	Maine	2017_ME	63000.6	3.4	1335743	0	1	47165.2	39.08	2.23	2.99	38.8	1	4.66	2.18759	14.05	3.68	0.628028	1704	88	13989		2	7	707792	546.127	15.9679	87.2051	2	7	99331	3285.97	12.1153	398.105	2	6	3100	71461.1	9.20405	6577.31
2018	ME	Maine	2018_ME	64806.3	3.4	1340123	0	1	48358.5	39.08	2.6	3.15	38.81	1	5.3	3.87	15.87	4.67	0.628106	1577	92	14450		2	8	709848	572	16.84	96.33	2	7	96066	3857.8	12.5114	482.664	2	6	3064	82560	9.32	7694.78
2019	ME	Maine	2019_ME	66351.2		1345770	0	1	49303.5	38.52	2.449	2.56	35.59	1	4.95	3.35	16.1551	3.32923	0.602968	1711				2	9	710869	562	17.89	100.53	2	8	99738	3466	12.83	444.6	2	7	2893	80364.3	9.22178	7411.02
2020	ME	Maine	2020_ME	67420.6			0	1		36.13	1.891	2.03	33.27	1		3.11	9.58	3.22	0.584856		43			1	1	717559	569.67	16.8118	95.772	2	5	97575	3258.74	12.5644	409.44	2	5	2681	81618.3	8.86465	7235.17
2006	MI	Michigan	2006_MI	483764	7	10036081	0	0	48202.4	41.9669	2.137	6.73	18.61	0		1.64	14.4	7.16101	0.470406		1752	110391	303305	9	60	4299273	671.084	9.76814	65.5525	9	59	514049	6370.83	8.51044	542.185	9	47	13317	213342	6.04597	12898.6
2007	MI	Michigan	2007_MI	482935	7	10001284	0	0	48287.3	41.9669	2.286	6.97	32.78	0		1.69	16.41	7.38155	0.58103		1705	125463	330581	9	60	4298455	686	10.2126	70.02	9	59	518058	6442	8.77447	565.24	9	45	13227	213445	6.47041	13810.8
2008	MI	Michigan	2008_MI	455257	8	9946889	0	0	45768.8	40.69	2.983	8.86	45.88	0		1.93	24.38	9.11825	0.683301		1660	94815	329075	9	60	4290313	666	10.7453	71.58	9	59	518776	6261	9.19514	575.67	9	47	12776	212015	6.73681	14283.1
2009	MI	Michigan	2009_MI	416297	13.7	9901591	0	0	42043.5	43.33	2.141	3.94	45.86	0		2.03	12.98	4.5973	0.66		1484	85127	228540	9	60	4253786	644	11.6	74.69	9	59	520551	6063	9.24	560.11	9	47	13065	174710	6.99	12205
2010	MI	Michigan	2010_MI	453989	12.6	9877597	0	0	45961.5	44.27	2.705	4.37	49.29	0		2.09	16.76	4.99242	0.709922		1475	114841	309636	8	59	4245158	681	12.46	84.82	8	58	520233	6107	9.81	599.23	8	45	12827	200362	7.08	14180.8
2011	MI	Michigan	2011_MI	453989	10.4	9883053	0	0	45936.1	45.02	3.467	4	55.64	0	2.44	2.66	22.17	4.65243	0.76	620398			344155	8	59	4249136	683	13.27	90.63	8	58	521322	6172	10.33	637.64	8	44	12961	203329	7.32	14884.6
2012	MI	Michigan	2012_MI	463303	9.1	9898289	0	0	46806.3	45.77	3.58	2.75	54.99	0	2.42	2.78	22.67	3.16	0.79	559748	1286	184389		8	41	4250620	675.61	14.1349	95.4965	8	39	521091	6159.24	10.9345	673.484	8	28	13074	202921	7.62392	15470.5
2013	MI	Michigan	2013_MI	472780	8.8	9914802	0	0	47684.3	45.02	3.483	3.73	51.99	0	2.51	2.66	22.75	4.49	0.8	588873	1283	113033	302194	8	41	4265264	664.538	14.5896	96.9531	8	39	520327	6037.47	11.0638	667.975	8	29	13419	194510	7.71572	15007.8
2014	MI	Michigan	2014_MI	479535	7.2	9932033	0	0	48281.6	45.67	3.117	4.37	46.16	0		2.6	21.3	6.57	0.7					8	40	4273126	653.6	14.4607	94.515	8	39	522422	5957.66	10.8705	647.63	8	29	13289	203464	7.67774	15621.4
2015	MI	Michigan	2015_MI	490619	5.4	9934483	0	0	49385.4	42.6	1.822	2.62	44.13	0	2.28	2.39	12.86	3.12	0.669639					8	39	4282858	649.058	14.4218	93.606	8	38	532858	6011.72	10.5546	634.512	8	29	6041	423178	7.0237	29722.8
2016	MI	Michigan	2016_MI	500160	5	9954117	0	1	50246.5	40.39	1.702	2.52	42.43	0		2.25	11.3093	2.71	0.656367	432197				8	40	4311008	667.734	15.2217	101.641	8	38	538677	6031.12	10.6366	641.504	8	29	6191	416390	6.91048	28774.5
2017	MI	Michigan	2017_MI	505102	4.6	9976752	0	1	50627.8	39.08	2.23	2.99	38.8	0	2.04	2.17	13.01	3.72435	0.68	445988	1029			7	38	4344321	632.576	15.3985	97.4071	7	37	542959	5882.17	11.0032	647.228	8	29	6196	411429	7.19424	29599.2
2018	MI	Michigan	2018_MI	516843	4.1	9987286	0	1	51750.1	39.08	2.6	3.15	38.81	0	2.15	2.18759	15.72	3.25	0.63			266003		7	39	4365529	671	15.45	103.59	7	37	543261	5970.93	11.1477	665.624	8	29	5972	429867	7.1	30520
2019	MI	Michigan	2019_MI	517845		9984795	0	1	51863.4	38.52	2.449	2.56	35.59	0	1.9	2.09	13.95	2.6	0.602968	397792		291575		7	57	4384305	637	15.74	100.23	7	56	544690	5792	11.39	659.86	8	45	5726	434952	7.07372	30767.3
2020	MI	Michigan	2020_MI	502484			0	1		36.13	1.891	2.03	33.27	0		2.12733	12.5353	2.03	0.51		992	317677		1	1	4423595	675.599	16.2604	109.855	7	30	546115	5415.65	11.7114	634.249	7	21	5580	383125	7.24303	27749.9
2006	MN	Minnesota	2006_MN	302273	4	5163555	0	0	58539.6	41.9669	2.137	6.73	18.61	0	2.47	1.21	13.53	8.65	0.470406				137569	5	176	2240891	814.758	8.69542	70.8466	5	175	260186	7102.36	7.01877	498.498	4	117	8503	222120	5.28718	11743.9
2007	MN	Minnesota	2007_MN	304208	4.6	5207203	0	0	58420.6	41.9669	2.286	6.97	32.78	0	2.68	1.5	15.87	7.18	0.58103				137437	5	176	2267167	832	9.17836	76.4	5	175	266164	7052	7.47761	527.3	4	118	8726	220046	5.68896	12518.3
2008	MN	Minnesota	2008_MN	309290	5.4	5247018	0	0	58945.9	40.69	2.983	8.86	45.88	0	2.65	1.66	21.55	9.11	0.48				135843	5	175	2279850	817	9.73526	79.55	5	172	270442	6965	7.87858	548.75	4	116	9097	218116	5.87461	12813.5
2009	MN	Minnesota	2009_MN	296875	7.8	5281203	0	0	56213.6	43.33	2.141	3.94	45.86	0	2.21	1.64	13.54	6.49	0.71				129623	5	175	2290881	802	10.04	80.48	5	173	273429	6800	7.92	538.24	4	117	9425	173626	6.26	10867
2010	MN	Minnesota	2010_MN	315213	7.4	5310934	0	0	59351.8	44.27	2.705	4.37	49.29	0	2.42	1.75	16.91	5.96	0.84					5	175	2300291	814	10.59	86.19	5	171	276463	6787	8.38	568.83	4	116	10150	187174	6.29	11767.5
2011	MN	Minnesota	2011_MN	315213	6.5	5346620	0	0	58955.6	45.02	3.467	4	55.64	0	2.46	1.93	22.7589	5.88	0.9					5	175	2308736	813	10.96	89.14	5	171	276286	6748	8.63	582.1	4	118	10673	184412	6.47	11926.7
2012	MN	Minnesota	2012_MN	321054	5.6	5377500	0	0	59703.2	45.77	3.58	2.75	54.99	0	2.32	1.98	23.492	3.71	0.754422	236434	341	58303		5	114	2317336	793.283	11.3533	90.0636	5	110	278466	6732.06	8.84022	595.129	4	91	11010	177231	6.53658	11584.9
2013	MN	Minnesota	2013_MN	329774	5	5414722	0	0	60903.3	45.02	3.483	3.73	51.99	0	2.65	2	23.13	4.40433	0.97		391		111885	5	114	2329734	817.316	11.8081	96.5097	5	111	281187	6828.55	9.4213	643.338	4	92	11383	166434	6.982	11620.4
2014	MN	Minnesota	2014_MN	338624	4.2	5452665	0	0	62102.5	45.67	3.117	4.37	46.16	0		1.95	20.4885	5.82	0.685487		672			5	113	2345860	809.634	12.0128	97.2598	5	112	284978	6675.32	9.85212	657.661	4	94	9898	194285	6.72416	13064
2015	MN	Minnesota	2015_MN	345456	3.7	5484002	0	0	62993.4	42.6	1.822	2.62	44.13	0		2.25949	13.13	3.38436	0.85	253939				5	113	2374674	761.998	12.1154	92.3194	5	112	289044	6742.92	9.43656	636.3	4	94	9812	182201	7.02125	12792.8
2016	MN	Minnesota	2016_MN	350604	3.9	5525360	0	1	63453.5	40.39	1.702	2.52	42.43	0		2.21434	11.34	3.29247	0.656367				144970	4	113	2378681	763.861	12.6711	96.79	4	111	291569	6717.03	9.85581	662.018	3	93	9000	196452	7.37207	14482.6
2017	MN	Minnesota	2017_MN	354722	3.4	5569283	0	1	63692.6	39.08	2.23	2.99	38.8	0		2.18759	13.18	3.81	0.628028			51584		4	112	2403168	748.103	13.0435	97.5785	4	111	292859	6622.61	10.4786	693.956	3	93	8984	206672	7.37217	15236.2
2018	MN	Minnesota	2018_MN	364800	2.9	5608762	0	1	65041	39.08	2.6	3.15	38.81	0		2.19	16.47	3.47	0.628106	241799	439	67556		4	113	2420325	786	13.14	103.34	4	111	295855	6590.66	10.3819	684.236	3	93	9406	199056	7.53	14986.5
2019	MN	Minnesota	2019_MN	368689		5640053	0	1	65369.7	38.52	2.449	2.56	35.59	0		2.17615	16.1551	3.32923	0.81					4	171	2446111	759	13.04	99.02	4	170	299995	6362	10.34	658.1	3	120	8998	201415	7.52686	15160.3
2020	MN	Minnesota	2020_MN	358127			0	1		36.13	1.891	2.03	33.27	0		2.12733	12.5353	2.84222	0.584856					1	1	2464753	775.455	13.1683	102.114	4	44	303702	5906.74	10.4273	615.916	3	40	9042	180379	7.6722	13839
2006	MO	Missouri	2006_MO	286558	4.8	5842704	0	0	49045.5	41.9669	2.137	6.73	18.61	0	1.24	1.11	14.57	6.76	0.42			33285		4	134	2641569	1068.81	7.43655	79.4829	4	132	359108	6915.39	6.07659	420.22	4	90	10528	144976	4.57691	6635.42
2007	MO	Missouri	2007_MO	288321	5.1	5887612	0	0	48970.8	41.9669	2.286	6.97	32.78	0	1.52	1.33	17.13	7.17	0.47			42015		4	133	2666181	1121	7.68958	86.22	4	133	363192	7142	6.33809	452.65	4	91	10634	145091	4.76308	6910.77
2008	MO	Missouri	2008_MO	297882	6.1	5923916	0	0	50284.6	40.69	2.983	8.86	45.88	0	1.71	1.5	21.02	7.65	0.47			43772		4	133	2686746	1098	8.00106	87.83	4	133	371220	6985	6.6105	461.78	4	92	9431	157726	4.92187	7763.06
2009	MO	Missouri	2009_MO	289567	9.3	5961088	0	0	48576.2	43.33	2.141	3.94	45.86	0	1.56	1.52	12.84	4.72	0.683145			30329		4	133	2687756	1061	8.54	90.66	4	133	368476	6874	6.96	478.43	4	90	8982	139636	5.42	7569.21
2010	MO	Missouri	2010_MO	292984	9.6	5996089	0	0	48862.6	44.27	2.705	4.37	49.29	0	1.67	1.57	16.39	5.2	0.709922			40900	94027	4	134	2695809	1153	9.08	104.66	4	134	370955	7061	7.5	529.72	4	89	8899	162286	5.5	8930.37
2011	MO	Missouri	2011_MO	292984	8.5	6011182	0	0	48739.9	45.02	3.467	4	55.64	0	1.77	1.72	22.01	4.97	0.72		835	38438		4	133	2693261	1112	9.75	108.39	4	133	370920	6956	8.04	559.61	4	88	8759	164875	5.85	9639.49
2012	MO	Missouri	2012_MO	296514	6.9	6026027	0	0	49205.6	45.77	3.58	2.75	54.99	0		2.32424	22.83	3.50382	0.754422					4	74	2699287	1060.05	10.1694	107.801	4	73	373022	6809.86	8.1993	558.361	4	59	8901	164723	5.89262	9706.52
2013	MO	Missouri	2013_MO	302026	6.7	6042989	0	0	49979.5	45.02	3.483	3.73	51.99	0	1.92	1.9	22.8627	4.45	0.9		696			4	74	2708934	1086.47	10.6036	115.205	4	73	371712	6841.15	8.80432	602.317	4	58	10274	142360	6.2941	8960.29
2014	MO	Missouri	2014_MO	303618	6.1	6059130	0	0	50109.1	45.67	3.117	4.37	46.16	0	2.03	2	20.4885	4.99242	0.88	754299	1114	36086		4	73	2724541	1094.76	10.6385	116.466	4	73	371495	6878.79	8.89835	612.099	4	58	10282	141013	6.35803	8965.65
2015	MO	Missouri	2015_MO	308010	5	6075411	0	0	50697.8	42.6	1.822	2.62	44.13	0		1.9	12.88	3.38436	0.669639	673709			109182	4	73	2734553	1033.43	11.2054	115.801	4	73	373622	6810.68	9.16157	623.965	4	59	10218	138940	6.43562	8941.64
2016	MO	Missouri	2016_MO	308423	4.6	6091384	0	1	50632.7	40.39	1.702	2.52	42.43	0		2.21434	10.92	3.29247	0.656367		895			4	75	2751460	1040.51	11.2087	116.627	4	73	376711	6797.54	9.2609	629.513	4	61	10169	110739	7.12089	7885.6
2017	MO	Missouri	2017_MO	311274	3.8	6111382	0	2	50933.5	39.08	2.23	2.99	38.8	0		1.87	13.37	3.26	0.87	688946		48400		4	73	2771123	993.914	11.6304	115.596	4	73	381634	6589.42	9.47152	624.119	4	60	8191	134401	7.32795	9848.82
2018	MO	Missouri	2018_MO	314182	3.2	6125986	0	3	51286.8	39.08	2.6	3.15	38.81	0		1.8	16.15	3.3	0.85				111401	4	75	2792459	1118	11.34	126.79	4	73	384493	6757.66	9.4014	635.315	4	61	8086	138014	7.22	9959.09
2019	MO	Missouri	2019_MO	320881		6140475	0	3	52256.7	38.52	2.449	2.56	35.59	0		2.17615	16.1551	3.32923	0.602968					4	126	2811863	1058	11.14	117.82	4	125	384787	6526	9.07	592.07	4	90	10096	107383	7.10868	7633.55
2020	MO	Missouri	2020_MO	315276			0	3		36.13	1.891	2.03	33.27	0	1.55	2.12733	9.19	2.23	0.584856					1	1	2833918	1027.74	11.2232	115.346	4	45	387872	6000.92	8.93322	536.075	4	38	10108	105723	6.84196	7233.56
2006	MS	Mississippi	2006_MS	105880	6.5	2904978	1	0	36447.7	41.9669	2.137	6.73	18.61	0	3.5	2.24655	13.33	6.97	0.470406		165		108718	2	50	1212812	1255.77	9.6569	121.268	2	50	218193	4945.35	9.3677	463.266	2	48	7749	168966	5.94457	10044.3
2007	MS	Mississippi	2007_MS	107714	6.1	2928350	1	0	36783.1	41.9669	2.286	6.97	32.78	0	4.18	2.24655	14.43	7.21	0.58103		398		98164	2	50	1227001	1261	9.35855	118	2	50	222387	5021	8.92239	448.02	2	48	7505	179737	5.75354	10341.2
2008	MS	Mississippi	2008_MS	109434	6.6	2947806	1	0	37123.9	40.69	2.983	8.86	45.88	0	5.01	2.22047	20.29	9.39	0.683301		231		98215	2	50	1238408	1231	10.3943	127.95	2	50	224391	4914	10.0163	492.23	2	47	7397	182449	6.55627	11961.9
2009	MS	Mississippi	2009_MS	105360	9.5	2958774	1	0	35609.3	43.33	2.141	3.94	45.86	0	3.05	3.37	12.73	4.29	0.62		132		115033	2	50	1243260	1213	10.22	124	2	50	222861	4866	9.5	462.25	2	47	7151	174107	6.61	11513.5
2010	MS	Mississippi	2010_MS	106491	10.4	2970615	1	0	35848.2	44.27	2.705	4.37	49.29	0	3.5	2.2936	16.83	4.83	0.77		125	237415	100791	2	50	1250149	1345	9.87	132.76	2	50	224517	5124	9.32	477.3	2	47	6797	192577	6.32	12174.1
2011	MS	Mississippi	2011_MS	106491	10	2979147	1	0	35745.5	45.02	3.467	4	55.64	0	3.37	3.87	22.7589	4.28	0.78					2	50	1251640	1287	10.17	130.9	2	50	226136	5063	9.48	479.86	2	47	6931	195537	6.53	12772.2
2012	MS	Mississippi	2012_MS	108646	9	2984599	1	0	36402.4	45.77	3.58	2.75	54.99	0	2.85	4.45	22.22	3.50382	0.91	79848	150			2	46	1256392	1193.41	10.2636	122.487	2	45	227384	4978.6	9.32655	464.331	2	44	7125	196612	6.23929	12267.2
2013	MS	Mississippi	2013_MS	109033	8.5	2989839	1	0	36467.7	45.02	3.483	3.73	51.99	0	3.17	2.30892	22.8627	4.40433	1.01		130	238228	113523	2	46	1260892	1220.2	10.7764	131.493	2	45	228508	5174.08	10.101	522.634	2	41	7165	187622	6.33884	11893.1
2014	MS	Mississippi	2014_MS	109300	7.5	2991892	1	0	36531.9	45.67	3.117	4.37	46.16	0		3.27	20.4885	4.58	0.88		174		107228	2	45	1263583	1247.91	11.3162	141.216	2	45	230416	5126.45	10.7613	551.672	2	42	10922	124458	6.60264	8217.51
2015	MS	Mississippi	2015_MS	109402	6.4	2990231	1	0	36586.4	42.6	1.822	2.62	44.13	0		2.25949	12.0877	3.38436	0.81	69064			122511	2	45	1270397	1217.54	11.2718	137.239	2	46	231388	5183.1	10.5462	546.618	2	42	10860	120770	6.56143	7924.23
2016	MS	Mississippi	2016_MS	109911	5.8	2990595	1	0	36752.2	40.39	1.702	2.52	42.43	0		2.21434	11.3093	3.29247	0.656367		184			2	46	1278616	1203.05	10.4663	125.915	2	46	232885	5196.61	9.57372	497.509	2	41	11214	119410	5.79402	6918.6
2017	MS	Mississippi	2017_MS	110281	5.1	2990674	1	0	36875.1	39.08	2.23	2.99	38.8	0		2.66	14.7344	3.72435	0.628028					2	45	1284578	1131.63	11.0792	125.376	2	46	235245	5050.11	10.1669	513.437	2	41	11156	120478	5.98915	7215.6
2018	MS	Mississippi	2018_MS	110175	4.8	2982879	1	0	36935.7	39.08	2.6	3.15	38.81	0		2.69	15.64	3.21	0.628106	60015	270	377458		2	46	1290281	1247	11.12	138.63	2	46	236871	5111.86	10.4315	533.245	2	41	10988	125511	6	7531.7
2019	MS	Mississippi	2019_MS	110538		2978227	1	0	37115.3	38.52	2.449	2.56	35.59	0		2.17615	16.1551	3.32923	0.602968					2	48	1293419	1206	11.27	135.87	2	49	237625	4994	10.52	525.25	2	43	10379	128418	5.85311	7516.44
2020	MS	Mississippi	2020_MS	109894			1	0		36.13	1.891	2.03	33.27	0		2.12733	12.5353	2.84222	0.584856					1	1	1308149	1146.33	11.1728	128.078	2	41	237370	4628.9	10.3825	480.596	2	36	10343	123288	5.63455	6946.74
2006	MT	Montana	2006_MT	40055	3.5	952692	1	0	42044	41.9669	2.137	6.73	18.61	0		0.87	15.33	7.16101	0.470406		144			4	36	449308	814.952	8.28282	67.501	4	35	96617	4041.72	7.44295	300.824	3	25	4734	83351.2	5.11591	4264.17
2007	MT	Montana	2007_MT	42057.7	3.6	964706	1	0	43596.4	41.9669	2.286	6.97	32.78	0		1.11	17.72	7.38155	0.58103		120			4	36	459379	824	8.77325	72.28	4	35	98720	4075	8.1044	330.28	3	26	4490	114379	5.15695	5898.44
2008	MT	Montana	2008_MT	42049.3	5.1	976415	1	0	43065	40.69	2.983	8.86	45.88	0		1.34	20.63	9.11825	0.683301		81			4	36	461600	843	9.12777	76.95	4	35	100371	4006	8.54268	342.25	3	26	4879	99601	5.90466	5881.08
2009	MT	Montana	2009_MT	40938.4	6.8	983982	1	0	41604.8	43.33	2.141	3.94	45.86	0		1.37	12.74	4.5973	0.683145		101			4	35	464517	856	8.93	76.48	4	35	100207	3975	8.32	330.65	3	27	5225	76117	5.45	4148.97
2010	MT	Montana	2010_MT	43532.2	7.3	990730	1	0	43939.5	44.27	2.705	4.37	49.29	0		1.41	15.01	4.99242	0.709922		96			4	35	467878	845	9.16	77.37	4	35	101129	3946	8.55	337.34	3	26	5217	62155	5.49	3411.07
2011	MT	Montana	2011_MT	43532.2	6.9	997518	1	0	43640.5	45.02	3.467	4	55.64	0		2.30892	20.48	4.15	0.759496		162			4	35	469963	871	9.75	84.97	4	35	101512	4016	9.12	366.1	3	25	5877	56473	5.27	2978.58
2012	MT	Montana	2012_MT	44329.1	6	1004168	1	0	44145.1	45.77	3.58	2.75	54.99	0		2.32424	23.492	3.50382	0.754422					4	31	473033	841.796	10.0832	84.8804	4	30	101530	4036.17	9.12833	368.435	3	24	7268	47783.8	5.10424	2439
2013	MT	Montana	2013_MT	45114.7	5.4	1014158	1	0	44484.9	45.02	3.483	3.73	51.99	0	2	2.30892	23.85	5.21	0.731001		108			4	31	477266	860.19	10.3294	88.8521	4	30	101216	4025.75	9.53565	383.881	3	26	8692	40545.5	5.42721	2200.49
2014	MT	Montana	2014_MT	46166.7	4.7	1022657	1	0	45143.9	45.67	3.117	4.37	46.16	0		2.3222	22.73	4.99242	0.685487	170478		5775		4	30	485041	853.75	10.1819	86.9277	4	30	103132	3961.88	9.64174	381.994	3	28	9597	36730.1	5.49206	2017.24
2015	MT	Montana	2015_MT	47765.6	4.2	1031495	1	0	46307.2	42.6	1.822	2.62	44.13	0	1.77	1.72	12.0877	3.38436	0.669639	173398				4	30	491422	818.24	10.8804	89.0281	4	30	104325	3909.33	10.2269	399.803	3	28	9710	38513.6	5.32063	2049.16
2016	MT	Montana	2016_MT	47189.6	4.1	1042137	1	0	45281.6	40.39	1.702	2.52	42.43	0		2.21434	11.3093	3.29247	0.656367					4	31	497170	813.361	10.9357	88.947	4	30	105934	3800.82	10.1901	387.307	3	26	9814	37501	5.05619	1896.12
2017	MT	Montana	2017_MT	48470.5	3.9	1053862	1	0	45993.2	39.08	2.23	2.99	38.8	0		2.18759	14.7344	1.78	0.628028					4	30	503313	865.033	10.9537	94.7533	4	30	107147	3865.5	10.1199	391.184	3	26	9893	38031.5	5.24817	1995.96
2018	MT	Montana	2018_MT	49455	3.7	1061818	1	0	46575.8	39.08	2.6	3.15	38.81	0		2.01	18.21	3.87138	0.628106		139			4	31	509526	850	10.96	93.19	4	30	108695	3772.97	10.107	381.334	3	27	9915	39670	5.19	2060.18
2019	MT	Montana	2019_MT	50318.9		1070123	1	0	47021.6	38.52	2.449	2.56	35.59	0		2.17615	16.1551	3.32923	0.602968					4	35	516052	857	11.13	95.43	4	35	109459	3773	10.41	392.75	3	31	11286	37340.4	5.45126	2035.52
2020	MT	Montana	2020_MT	50159.6			1	0		36.13	1.891	2.03	33.27	0		2.12733	12.5353	2.84222	0.584856					1	1	522382	858.242	11.2425	96.4881	4	15	110977	3531.03	10.5143	371.264	3	13	11414	32868	5.17531	1701.02
2006	NC	North Carolina	2006_NC	470664	4.7	8917270	0	0	52781.2	41.9669	2.137	6.73	18.61	0		2.69	13.99	7.64	0.43			28743	417016	3	107	4011329	1097.96	9.11648	100.095	3	106	621995	5973.35	7.16679	428.097	3	66	10867	224402	5.23082	11738.1
2007	NC	North Carolina	2007_NC	477921	4.7	9118037	0	0	52414.9	41.9669	2.286	6.97	32.78	0		2.75	14.91	7.94	0.41			40685		3	107	4090510	1143	9.39655	107.38	3	106	639991	6095	7.42892	452.77	3	68	10748	224681	5.46502	12278.8
2008	NC	North Carolina	2008_NC	492689	6.1	9309449	0	0	52923.5	40.69	2.983	8.86	45.88	0		3.26	19.76	11	0.43			36375	415742	3	106	4146430	1120	9.51654	106.61	3	105	649617	5970	7.55181	450.83	3	69	10968	211013	5.53523	11680
2009	NC	North Carolina	2009_NC	473610	10.6	9449566	0	0	50119.8	43.33	2.141	3.94	45.86	0		3.59	12.28	7.63	0.5			40212	427226	3	106	4175829	1124	9.99	112.3	3	105	650652	5922	7.98	472.59	3	71	11375	183880	5.99	11014.7
2010	NC	North Carolina	2010_NC	484200	10.9	9574586	0	0	50571.4	44.27	2.705	4.37	49.29	0		3.52	17.8158	6.49	0.709922			73574		3	106	4185540	1238	10.12	125.2	3	105	644609	6197	8.16	505.55	3	70	11016	199073	6.17	12279.3
2011	NC	North Carolina	2011_NC	484200	10.3	9658913	0	0	50129.9	45.02	3.467	4	55.64	0	2.68	3.63	22.01	4.65243	0.58		2199	90231		3	106	4201898	1151	10.26	118.09	3	105	644926	6004	8.13	488.42	3	70	10609	208586	6.01	12546.2
2012	NC	North Carolina	2012_NC	488126	9.3	9751810	0	1	50055	45.77	3.58	2.75	54.99	0	2.66	3.77	23.18	4.36	0.59	514196	1970	151823	412722	3	68	4230588	1076.91	10.9064	117.453	3	66	652401	5940.89	8.66443	514.745	3	53	10399	215535	6.42279	13843.3
2013	NC	North Carolina	2013_NC	497457	8	9846717	0	1	50520	45.02	3.483	3.73	51.99	0	2.84	3.8	22.55	4.99	0.65		2257	202953		3	68	4268019	1098.31	10.9731	120.518	3	66	654747	5937.25	8.75733	519.945	3	53	10276	217922	6.44874	14053.2
2014	NC	North Carolina	2014_NC	509782	6.3	9937295	0	1	51299.9	45.67	3.117	4.37	46.16	0	3.01	3.58	20.4885	4.99242	0.685487	481875	5065			3	67	4303476	1135.71	11.1021	126.088	3	67	655841	6036.72	8.75139	528.297	3	53	10356	216980	6.49679	14096.7
2015	NC	North Carolina	2015_NC	525229	5.7	10037218	0	1	52328.2	42.6	1.822	2.62	44.13	0	2.68	2.25949	13.22	3.38436	0.669639	387313	4558	278746	440248	3	67	4336698	1112.63	11.281	125.515	3	68	665198	6042.83	8.72886	527.47	3	51	10284	224468	6.5128	14619.2
2016	NC	North Carolina	2016_NC	536308	5.1	10161802	0	1	52776.9	40.39	1.702	2.52	42.43	0	2.29	3.1	10.58	3.68	0.63	364715	2747	303649	447500	3	68	4423532	1101.25	11.0271	121.436	3	68	672610	6021.84	8.61961	519.059	3	52	10052	226629	6.31194	14304.7
2017	NC	North Carolina	2017_NC	546810	4.5	10275758	0	1	53213.6	39.08	2.23	2.99	38.8	0	2.33	2.18759	14.7344	3.72435	0.67	335149				3	68	4488039	1042.29	10.9353	113.977	3	69	680967	5860.59	8.44201	494.752	3	52	10045	227255	6.2035	14097.8
2018	NC	North Carolina	2018_NC	556574	3.9	10391358	0	1	53561.2	39.08	2.6	3.15	38.81	0		3.15	17.12	3.87138	0.62	312335	6940	339597	439915	3	69	4550420	1129	11.09	125.17	3	69	691673	5939.51	8.57787	509.483	3	52	10027	227387	6.33	14401.5
2019	NC	North Carolina	2019_NC	568476		10501384	0	1	54133.4	38.52	2.449	2.56	35.59	0	2.15	2.17615	14.67	3.58	0.6				437683	3	106	4620856	1079	11.42	123.25	3	107	705587	5808	8.81	511.49	3	69	9871	231241	6.30338	14576
2020	NC	North Carolina	2020_NC	564794			0	1		36.13	1.891	2.03	33.27	0	1.89	2.54	12.5353	2.84222	0.6	213293				1	1	4695096	1040.83	11.3792	118.438	3	55	710220	5386.25	8.69	468.065	3	42	9822	219136	6.31152	13830.8
2006	ND	North Dakota	2006_ND	30911.4	3.2	649422	1	0	47598.3	41.9669	2.137	6.73	18.61	0	1.25	0.88	14.1311	7.16101	0.470406					3	36	309997	1035.77	7.136	73.9128	3	35	53709	6402.64	6.30011	403.373	3	25	2331	116747	4.99616	5832.87
2007	ND	North Dakota	2007_ND	32529	3.1	652822	1	0	49828.3	41.9669	2.286	6.97	32.78	0	1.31	0.98	15.0977	7.38155	0.58103					3	36	314466	1078	7.30458	78.73	3	34	54550	6439	6.58457	423.95	3	25	2725	110817	5.23578	5802.14
2008	ND	North Dakota	2008_ND	35030.4	3.2	657569	1	0	53272.6	40.69	2.983	8.86	45.88	0	1.36	1.08	19.6192	9.11825	0.683301					3	35	318760	1113	7.51497	83.68	3	33	56510	6577	6.811	447.97	3	25	2143	143759	5.58825	8033.64
2009	ND	North Dakota	2009_ND	35971.3	4.1	664968	1	0	54094.8	43.33	2.141	3.94	45.86	0	1.31	1.14	14.1571	4.5973	0.683145					3	35	322466	1150	7.58	87.17	3	33	57435	6614	6.81	450.33	3	26	2488	121958	5.25	6399.79
2010	ND	North Dakota	2010_ND	43300.4	3.8	674752	1	0	64172.3	44.27	2.705	4.37	49.29	0	1.48	1.25	17.8158	4.99242	0.709922	312322				3	35	326409	1121	8.13	91.16	3	33	58568	6707	7.21	483.78	3	25	2641	121468	5.81	7060.46
2011	ND	North Dakota	2011_ND	43300.4	3.5	685526	1	0	63163.8	45.02	3.467	4	55.64	0	1.56	1.34	22.7589	7.83	0.759496					3	35	330738	1147	8.58	98.46	3	33	60017	6757	7.61	513.86	3	26	3639	98895	6.24	6171.01
2012	ND	North Dakota	2012_ND	53326.8	3.1	702227	1	0	75939.5	45.77	3.58	2.75	54.99	0	1.65	1.49	23.492	5.71	0.754422	310998		1		3	24	342549	1091.03	9.06028	98.85	3	22	63160	6740.31	8.02306	540.779	3	22	4602	92778.2	6.55199	6078.82
2013	ND	North Dakota	2013_ND	54690.9	2.9	723149	1	0	75628.8	45.02	3.483	3.73	51.99	0	1.8	2.30892	23.28	4.40433	0.731001		367			3	24	348486	1204.94	9.11638	109.847	3	22	66801	7092.14	8.38873	594.941	3	21	6683	66200	7.12639	4717.67
2014	ND	North Dakota	2014_ND	60193	2.7	738736	1	0	81481.1	45.67	3.117	4.37	46.16	0		1.53	21.2	4.99242	0.685487					3	23	360171	1239.58	9.14736	113.389	3	22	67871	6634.52	8.78548	582.875	3	22	8607	72409.3	7.61988	5517.5
2015	ND	North Dakota	2015_ND	58694.5	2.8	755537	1	0	77685.8	42.6	1.822	2.62	44.13	0	1.9	2.25949	12.0877	3.38436	0.669639			7048		3	23	371501	1090.74	9.62243	104.956	3	22	71210	7347.83	8.83332	649.058	3	22	8158	71377.2	8.06721	5758.15
2016	ND	North Dakota	2016_ND	54756	3.1	756114	1	0	72417.7	40.39	1.702	2.52	42.43	0		1.55	9.41	3.29247	0.656367	299545				3	24	377739	1045.98	10.1607	106.279	3	22	73573	7188.05	9.14627	657.439	3	23	8634	71739	7.98186	5726.11
2017	ND	North Dakota	2017_ND	56530.2	2.7	756755	1	0	74700.8	39.08	2.23	2.99	38.8	0	1.83	2.18759	14.7344	3.72435	0.628028					3	23	380101	1062.94	10.2902	109.379	3	22	74527	7301.5	9.19215	671.165	3	23	8708	83852.1	7.63257	6400.07
2018	ND	North Dakota	2018_ND	58516.4	2.6	760062	1	0	76989	39.08	2.6	3.15	38.81	0		1.55	17.1346	2.83	0.628106			10526		3	24	382596	1118	10.25	114.6	3	22	75148	7580.5	9.09538	689.476	3	23	8985	80694	7.98	6441.06
2019	ND	North Dakota	2019_ND	59142.3		763724	1	0	77439.4	38.52	2.449	2.56	35.59	0	1.83	2.17615	14.49	3.32923	0.602968					3	33	385038	1109	10.3	114.27	3	32	76355	7678	9.01	691.77	3	25	8803	88973.4	7.94439	7068.39
2020	ND	North Dakota	2020_ND	55699.1			1	0		36.13	1.891	2.03	33.27	0		2.12733	12.5353	2.84222	0.584856					1	1	387506	1085.26	10.4363	113.261	3	17	76834	7203.52	9.01826	649.632	3	18	8933	94511	7.26262	6863.97
2006	NE	Nebraska	2006_NE	97322.8	3.1	1772693	1	0	54901.1	41.9669	2.137	6.73	18.61	1	0.87	0.8	15.34	7.16101	0.470406	219168			93943	0	160	782903	989.214	7.41186	73.3192	0	155	149186	5030.36	6.19381	311.571	0	96	38541	19410.7	4.55583	884.318
2007	NE	Nebraska	2007_NE	99780.7	3	1783440	1	0	55948.4	41.9669	2.286	6.97	32.78	1	1.02	0.88	16.69	7.38155	0.58103	208672			115815	0	159	790165	1028	7.5916	78.04	0	153	151342	5174	6.39083	330.66	0	96	39099	19405	4.77605	926.77
2008	NE	Nebraska	2008_NE	99860.1	3.3	1796378	1	0	55589.7	40.69	2.983	8.86	45.88	1	0.98	0.9	21.2	9.11825	0.683301	226849			99075	0	158	794548	1023	7.8691	80.46	0	153	152907	5144	6.6847	343.84	0	96	40777	19668	5.15777	1014.42
2009	NE	Nebraska	2009_NE	99986.4	4.6	1812683	1	0	55159.3	43.33	2.141	3.94	45.86	1	1.17	1.33	13.66	4.5973	0.56	242326			98682	0	158	799623	1003	8.52	85.49	0	154	154061	5038	7.33	369.34	0	97	41391	19149	5.75	1101.53
2010	NE	Nebraska	2010_NE	109734	4.6	1829591	1	0	59977.4	44.27	2.705	4.37	49.29	1	1.25	1.42	17.8158	4.99242	0.65	241811				1	158	801101	1051	8.94	93.97	1	154	154015	5158	7.63	393.79	1	97	45032	18895	6	1134.36
2011	NE	Nebraska	2011_NE	109734	4.4	1840914	1	0	59608.5	45.02	3.467	4	55.64	1	1.42	1.51	22.77	5.69	0.69	266339	397	4261	72549	1	158	805671	1029	9.32	95.92	1	154	148927	5114	7.99	408.39	1	101	51373	17178	6.43	1104.7
2012	NE	Nebraska	2012_NE	109686	4	1853691	1	0	59171.8	45.77	3.58	2.75	54.99	1	1.47	1.55	22.96	3.85	0.77	253670	244	7865	60795	1	81	806524	1000.19	10.0444	100.464	1	80	147463	5217.63	8.38164	437.323	1	71	54160	18332.9	7.00695	1284.58
2013	NE	Nebraska	2013_NE	111382	3.8	1865813	1	0	59696.3	45.02	3.483	3.73	51.99	1		1.42	22.39	4.40433	0.731001	272659	540			1	81	810867	1034.09	10.3137	106.654	1	81	148648	5262.47	8.60182	452.668	1	72	56365	16634.7	7.4425	1238.04
2014	NE	Nebraska	2014_NE	115652	3.3	1879955	1	0	61518.4	45.67	3.117	4.37	46.16	1		2.3222	20.4885	4.99242	0.685487					1	80	817425	1022.34	10.4009	106.332	1	81	151382	5243.65	8.72691	457.608	1	75	57429	15480.6	7.47114	1156.58
2015	NE	Nebraska	2015_NE	119641	3	1892059	1	0	63233.1	42.6	1.822	2.62	44.13	1	1.19	2.25949	18.25	3.38436	0.72	245144	92		107976	1	80	825940	961.746	10.6013	101.957	1	81	149820	5177.23	8.67472	449.11	1	74	60556	14662.9	7.59092	1113.05
2016	NE	Nebraska	2016_NE	121303	3.1	1906483	1	0	63626.6	40.39	1.702	2.52	42.43	1	1.19	1.35	11.3093	3.29247	0.656367	220452				1	81	834038	973.012	10.8396	105.47	1	81	149812	5176.95	8.79927	455.534	1	74	61613	15086.3	7.68943	1160.05
2017	NE	Nebraska	2017_NE	123220	2.9	1916998	1	0	64277.5	39.08	2.23	2.99	38.8	1	1.29	2.18759	14.7344	3.72435	0.628028					1	79	841965	956.888	10.9685	104.956	1	80	151485	5112.39	8.84626	452.255	1	73	62066	15303.1	7.66139	1172.43
2018	NE	Nebraska	2018_NE	125543	2.8	1925512	1	0	65200	39.08	2.6	3.15	38.81	1	1.25	1.26	17.36	3.87138	0.628106	243741				1	80	849898	1021	10.7	109.27	1	80	153749	5178.03	8.82732	457.081	1	74	61968	14758	7.6	1121.51
2019	NE	Nebraska	2019_NE	127482		1932571	1	0	65964.9	38.52	2.449	2.56	35.59	1		1.23	16.1551	3.32923	0.602968	222894				1	150	855619	1004	10.77	108.08	1	150	153814	5123	8.85	453.4	1	105	62204	14225.5	7.65292	1088.66
2020	NE	Nebraska	2020_NE	126891			1	0		36.13	1.891	2.03	33.27	1	1.16	1.24	12.32	2.36	0.584856	198587	217	11575		1	1	864842	1013.19	10.7967	109.391	1	23	155282	4878.35	8.88852	433.613	1	23	62716	15368.7	7.38124	1134.4
2006	NH	New Hampshire	2006_NH	71424.5	3.4	1308389	1	0	54589.7	41.9669	2.137	6.73	18.61	1		2.56	14.22	7.16101	0.470406				98067	3	9	587882	623.793	14.6824	91.5875	3	9	100730	3774.57	14.0669	530.964	3	8	3183	55796.2	11.6171	6481.88
2007	NH	New Hampshire	2007_NH	71943.5	3.5	1312540	1	0	54812.4	41.9669	2.286	6.97	32.78	1		2.9	15.76	7.38155	0.58103				112902	3	9	592238	632	14.8784	94.06	3	9	101848	3739	13.9143	520.27	3	8	3230	56068	12.2682	6878.53
2008	NH	New Hampshire	2008_NH	71195.6	3.9	1315906	1	0	54103.9	40.69	2.983	8.86	45.88	1	4.4	3.53	21.43	9.11825	0.683301				97729	3	9	594180	616	15.6845	96.66	3	9	102942	3657	14.3182	523.68	3	8	3431	50161	13.1737	6608.11
2009	NH	New Hampshire	2009_NH	70498.6	6.2	1316102	1	0	53566.2	43.33	2.141	3.94	45.86	1		3.66	13.32	4.5973	0.683145				92214	3	9	591160	623	16.26	101.38	3	9	92630	3995	14.55	581.23	3	8	3197	47863	13.83	6619.43
2010	NH	New Hampshire	2010_NH	73465	5.8	1316807	1	0	55790.3	44.27	2.705	4.37	49.29	1		2.2936	16.44	4.99242	0.709922					3	9	597411	626	16.32	102.11	3	9	104612	3555	14.26	506.84	3	8	3495	46308	12.75	5903.81
2011	NH	New Hampshire	2011_NH	73465	5.4	1320444	1	0	55636.6	45.02	3.467	4	55.64	1	3.03	3.55	22.7589	4.65243	0.67	24489			87508	3	9	599532	619	16.52	102.28	3	9	104610	3567	14.04	500.93	3	8	3491	46224	12.27	5669.84
2012	NH	New Hampshire	2012_NH	74082.8	5.5	1324677	1	0	55925.2	45.77	3.58	2.75	54.99	1	2.78	4.07	23.21	5.54	0.73	14191	51	52017		3	6	601697	614.818	16.0702	98.8022	3	5	104978	3555.05	13.3612	474.997	3	5	3444	47247.2	11.8323	5590.42
2013	NH	New Hampshire	2013_NH	75503.4	5.1	1327272	1	0	56886.2	45.02	3.483	3.73	51.99	1		2.30892	23.12	4.40433	0.77	16778		30521		3	6	603628	628.681	16.3287	102.655	3	5	105461	3569.14	13.5208	482.578	3	5	3371	48762.5	11.3985	5558.17
2014	NH	New Hampshire	2014_NH	76836.2	4.3	1334257	1	0	57587.3	45.67	3.117	4.37	46.16	1	2.69	4.27	20.4885	6.05	0.72	14867	1355	32214	106350	3	5	606883	619.352	17.5293	108.568	3	5	105840	3515.16	14.3391	504.041	3	5	3342	49098.9	11.9295	5857.27
2015	NH	New Hampshire	2015_NH	79319.3	3.4	1337480	1	0	59305	42.6	1.822	2.62	44.13	1		3.87	12.0877	4.92	0.669639			43955	99186	3	5	607465	621.016	18.5014	114.897	3	5	105833	3536.37	14.9647	529.208	3	5	3277	50377.1	12.7374	6416.71
2016	NH	New Hampshire	2016_NH	80736.1	2.9	1343694	1	0	60085.2	40.39	1.702	2.52	42.43	1		4.07	11.3093	3.29247	0.656367	5277				3	8	612716	603.652	18.3801	110.952	3	5	106900	3481.6	14.4334	502.512	3	5	3250	51291.2	12.3377	6328.15
2017	NH	New Hampshire	2017_NH	81179.6	2.7	1350395	1	0	60115.4	39.08	2.23	2.99	38.8	1		2.18759	14.7344	3.72435	0.628028			26738		3	5	618356	598.563	19.2048	114.953	3	5	107436	3405	14.8057	504.133	3	5	3220	50619.2	12.3393	6246.05
2018	NH	New Hampshire	2018_NH	82269.5	2.5	1355064	1	0	60712.6	39.08	2.6	3.15	38.81	1		3.87	15.26	5.95	0.68	7798	514	22213	105195	3	8	622671	621	19.69	122.27	3	5	107805	3434.1	15.8139	543.064	3	5	3176	51499	13.42	6910.18
2019	NH	New Hampshire	2019_NH	84031.2		1360783	1	0	61752.1	38.52	2.449	2.56	35.59	1	2.03	2.17615	16.1551	7.51	0.65	4182				3	9	627257	599	20.05	120.04	3	9	108247	3296	15.93	525.13	3	8	3193	50213.3	13.0898	6572.81
2020	NH	New Hampshire	2020_NH	83182.1			1	0		36.13	1.891	2.03	33.27	1		2.12733	12.5353	2.84222	0.62					1	1	633234	630.411	19.0375	120.015	3	4	109068	3078.9	15.4116	474.506	3	4	3180	49094.5	13.1123	6437.41
2006	NJ	New Jersey	2006_NJ	555211	4.7	8661679	0	0	64099.7	41.9669	2.137	6.73	18.61	1		2.24655	14.58	7.16101	0.470406		735			4	14	3372447	707.24	12.8441	90.8388	4	14	461461	7121.85	11.6201	827.564	4	8	13929	67787.8	10.4151	7060.15
2007	NJ	New Jersey	2007_NJ	560824	4.3	8677885	0	0	64626.8	41.9669	2.286	6.97	32.78	1		2.24655	16.31	7.38155	0.58103		1309			4	14	3394474	730	14.1397	103.28	4	14	465987	7310	12.991	949.63	4	7	13579	67588	10.0813	6813.75
2008	NJ	New Jersey	2008_NJ	573203	5.3	8711090	0	1	65801.5	40.69	2.983	8.86	45.88	1		2.22047	20.38	9.11825	0.683301		1268			4	14	3409806	711	15.6639	111.44	4	14	469341	7203	14.4836	1043.3	4	7	13391	65574	10.8619	7122.62
2009	NJ	New Jersey	2009_NJ	546362	9.1	8755602	0	1	62401.4	43.33	2.141	3.94	45.86	1	2.24	2.2744	12.18	4.5973	0.683145		343			4	14	3430837	676	16.31	110.29	4	14	476354	6889	13.83	952.82	4	7	13255	51868	11.81	6127.09
2010	NJ	New Jersey	2010_NJ	548479	9.5	8799451	0	1	62331.1	44.27	2.705	4.37	49.29	1	2.7	2.2936	17.02	4.99242	0.709922		1198		342526	4	14	3454840	731	16.57	121.13	4	14	478687	6985	13.89	970.02	4	7	12960	54196	11.81	6399.05
2011	NJ	New Jersey	2011_NJ	548479	9.3	8828552	0	1	62125.6	45.02	3.467	4	55.64	1	2.5	4.18	22.7589	5.11	0.68	49592	528	204780	351658	4	14	3457325	709	16.23	115.04	4	14	481663	6768	13.47	911.35	4	7	12715	52649	11.43	6015.64
2012	NJ	New Jersey	2012_NJ	560730	9.3	8845671	0	1	63390.3	45.77	3.58	2.75	54.99	1		4.05	23.492	3.50382	0.754422					4	9	3455302	691.28	15.7826	109.102	4	8	489943	6521.25	12.7772	833.23	4	6	12729	50817.9	10.5165	5344.27
2013	NJ	New Jersey	2013_NJ	570952	8.2	8857821	0	1	64457.4	45.02	3.483	3.73	51.99	1		2.30892	22.8627	4.19	0.8	25910				4	9	3461109	687.271	15.7287	108.099	4	9	482105	6608.36	12.7743	844.169	4	7	12369	50972.3	10.7976	5503.77
2014	NJ	New Jersey	2014_NJ	570696	6.8	8867277	0	1	64359.8	45.67	3.117	4.37	46.16	1	2.63	3.95	23.67	4.99242	0.76	30731			329533	4	8	3470874	669.682	15.7756	105.646	4	8	511335	6218.05	13.1457	817.408	4	6	12313	50871.8	11.3849	5791.69
2015	NJ	New Jersey	2015_NJ	581415	5.8	8870312	0	1	65546.2	42.6	1.822	2.62	44.13	1		3.82	14.7	3.38436	0.669639		697			4	8	3489111	696.029	15.8096	110.039	4	8	512894	6291.54	12.7893	804.647	4	6	12191	50039.6	10.6413	5324.86
2016	NJ	New Jersey	2016_NJ	587050	5	8873584	0	2	66157	40.39	1.702	2.52	42.43	1		2.21434	11.3093	2.12	0.69		352		312569	4	18	3510141	690.635	15.7224	108.585	4	8	514579	6262.79	12.2577	767.673	4	6	11929	50947.8	10.1615	5177.04
2017	NJ	New Jersey	2017_NJ	590087	4.6	8888147	0	2	66390.3	39.08	2.23	2.99	38.8	1		3.17	13.96	3.72435	0.73	16488				4	8	3536087	654.251	15.6477	102.375	4	8	517404	6115.69	12.2805	751.037	4	6	11773	51976.4	10.1167	5258.32
2018	NJ	New Jersey	2018_NJ	606892	4.1	8891730	0	2	68253.6	39.08	2.6	3.15	38.81	1		3.51	15.58	3.07	0.71	16732	1488	295139	334373	4	17	3568044	690	15.41	106.28	4	8	521429	6202.04	12.2065	757.051	4	6	11877	51704	10.07	5205.67
2019	NJ	New Jersey	2019_NJ	617111		8891258	0	2	69406.5	38.52	2.449	2.56	35.59	1		3.07	14.06	3.32923	0.602968		430			4	12	3596834	663	15.85	105.07	4	12	523796	6048	12.23	739.88	4	6	11781	49444.5	10.1588	5022.98
2020	NJ	New Jersey	2020_NJ	595973			0	2		36.13	1.891	2.03	33.27	1		2.12733	12.5353	1.79	0.584856					1	1	3618587	683.436	16.0285	109.544	4	5	526725	5587.3	12.3478	689.91	4	5	11629	48265.7	10.0075	4830.17
2006	NM	New Mexico	2006_NM	88554.5	4.2	1962137	1	0	45131.7	41.9669	2.137	6.73	18.61	0		2.24655	17.1	7.16101	0.470406		425			4	33	815799	613.859	9.05735	55.5994	4	33	130201	5506.68	7.61366	419.259	4	23	5497	103418	5.56908	5759.4
2007	NM	New Mexico	2007_NM	89392.3	3.8	1990070	1	0	44919.2	41.9669	2.286	6.97	32.78	0		2.24655	18.97	7.38155	0.58103		476			3	32	831081	640	9.11935	58.41	3	32	132379	5623	7.66484	430.96	3	24	5621	103013	5.59647	5765.08
2008	NM	New Mexico	2008_NM	89012.9	4.5	2010662	1	0	44270.4	40.69	2.983	8.86	45.88	0		2.22047	23.53	9.11825	0.683301		588			3	31	841329	632	10.0097	63.24	3	32	133782	5499	8.66826	476.68	3	24	6456	88175	6.38393	5629.02
2009	NM	New Mexico	2009_NM	90829.2	7.5	2036802	1	0	44594	43.33	2.141	3.94	45.86	0		2.2744	15.26	4.5973	0.683145		493			3	31	844865	642	10.02	64.3	3	32	135702	5364	8.4	450.45	3	24	6837	78119	5.72	4467.17
2010	NM	New Mexico	2010_NM	90552.3	8.1	2064614	1	0	43859.2	44.27	2.705	4.37	49.29	0		2.2936	17.8158	4.99242	0.709922		534			3	31	853811	659	10.52	69.35	3	32	135580	5541	8.57	474.87	3	25	7259	76458	6.01	4593.4
2011	NM	New Mexico	2011_NM	90552.3	7.5	2080707	1	0	43520	45.02	3.467	4	55.64	0	2.66	2.05	22.7589	4.84	0.759496	284166		74960		3	31	856128	669	11	73.57	3	32	136678	5644	9.07	512.18	3	24	7603	75741	6.06	4591.04
2012	NM	New Mexico	2012_NM	90762.4	7.1	2087715	1	0	43474.5	45.77	3.58	2.75	54.99	0	2.48	2.18	25.77	3.35	0.754422	262424	506	76396		3	26	859281	655.957	11.375	74.6151	3	26	137413	5558.39	9.32456	518.295	3	21	8238	73331.1	5.83062	4275.66
2013	NM	New Mexico	2013_NM	90104	6.9	2092833	1	0	43053.6	45.02	3.483	3.73	51.99	0		2.31	24.42	4.23	0.731001			76978		3	26	865195	655.342	11.6831	76.5642	3	26	138801	5392.95	9.74076	525.314	3	22	8676	69910.1	6.35568	4443.26
2014	NM	New Mexico	2014_NM	92621.1	6.7	2090236	1	0	44311.3	45.67	3.117	4.37	46.16	0		3.78	20.4885	4.77	0.685487			79540		3	25	869875	633.421	12.2813	77.7922	3	26	139873	5347.92	10.2703	549.247	3	22	9112	68836.9	6.61086	4550.71
2015	NM	New Mexico	2015_NM	93503.9	6.5	2090071	1	0	44737.2	42.6	1.822	2.62	44.13	0		2.25949	15.53	3.38436	0.669639					3	25	871047	635.416	12.4692	79.2312	3	26	142031	5208.4	10.3043	536.689	3	23	9348	67525.9	6.33355	4276.79
2016	NM	New Mexico	2016_NM	93043.5	6.6	2092555	1	0	44464.1	40.39	1.702	2.52	42.43	0		2.21434	11.32	3.29247	0.656367					3	29	876921	631.234	12.0336	75.9605	3	26	141723	5177.87	9.74742	504.709	3	23	9325	67838.8	5.83911	3961.18
2017	NM	New Mexico	2017_NM	93210.1	5.9	2092844	1	0	44537.5	39.08	2.23	2.99	38.8	0		2.18759	14.7344	3.43	0.628028		464			3	25	880867	614.66	12.879	79.1618	3	26	143326	5107.42	10.1923	520.562	3	23	9395	68547.7	6.15415	4218.53
2018	NM	New Mexico	2018_NM	96077	4.9	2093754	1	0	45887.4	39.08	2.6	3.15	38.81	0		2.48	19.37	2.44	0.628106	135031	240			3	30	889841	639	12.68	81.08	3	26	143874	5233.32	10.0218	524.474	3	23	9360	72889	5.84	4259.23
2019	NM	New Mexico	2019_NM	100446		2099634	1	0	47839.9	38.52	2.449	2.56	35.59	0	2.24	2.17615	16.1551	3.32923	0.602968	150010				3	31	895086	640	12.51	80.04	3	32	144960	5190	9.79	508.31	3	26	9456	79135.9	5.4804	4336.96
2020	NM	New Mexico	2020_NM	97511.9			1	0		36.13	1.891	2.03	33.27	0		2.12733	12.5353	2.84222	0.584856					1	1	905885	669.886	12.9362	86.6577	3	21	145459	4816.3	10.2752	494.884	3	19	9436	80261.7	5.57915	4477.92
2006	NV	Nevada	2006_NV	156298	4	2522658	1	0	61957.6	41.9669	2.137	6.73	18.61	0		2.24655	13.34	6.6	0.470406					2	16	1022122	976.573	11.0788	108.192	2	18	143217	5222.48	10.121	528.566	2	13	3404	333543	8.02623	26771
2007	NV	Nevada	2007_NV	157734	4.5	2601072	1	0	60642	41.9669	2.286	6.97	32.78	0		2.24655	17.72	6.13	0.58103					2	16	1047485	986	11.8175	116.49	2	18	149294	5220	10.092	526.82	2	13	3499	330873	8.28159	27401.5
2008	NV	Nevada	2008_NV	152746	6.7	2653630	1	0	57561	40.69	2.983	8.86	45.88	0		2.22047	23.6	7.93	0.683301					2	17	1054691	953	11.9291	113.68	2	18	152735	5076	10.0688	511.12	2	13	3608	319193	7.97863	25467.2
2009	NV	Nevada	2009_NV	140304	11.3	2684665	1	0	52261.4	43.33	2.141	3.94	45.86	0		2.2744	14.13	5.33	0.683145					2	17	1054927	938	12.86	120.66	2	18	153621	4855	10.64	516.7	2	13	3648	307133	7.97	24488.1
2010	NV	Nevada	2010_NV	144341	13.5	2702483	1	0	53410.6	44.27	2.705	4.37	49.29	0		2.2936	17.8158	5.58	0.709922					2	17	1058519	914	12.36	113.03	2	18	154455	4839	9.78	473.52	2	13	3484	315244	7.37	23239.8
2011	NV	Nevada	2011_NV	144341	13	2713114	1	0	53201.3	45.02	3.467	4	55.64	0		2.30892	22.7589	4.65243	0.759496					2	17	1067944	897	11.61	104.1	2	18	155395	4824	9.05	436.76	2	14	3506	318976	6.65	21201.5
2012	NV	Nevada	2012_NV	142986	11.2	2744670	1	0	52095.9	45.77	3.58	2.75	54.99	0		2.32424	23.492	3.50382	0.754422					2	12	1080583	934.89	11.8276	110.576	2	12	155927	4978.08	8.8299	439.56	2	10	3748	305373	6.48386	19800
2013	NV	Nevada	2013_NV	144549	9.6	2776956	1	0	52053.1	45.02	3.483	3.73	51.99	0	3.93	2.30892	22.8627	4.27	0.731001	57255	199	187416		2	13	1094770	924.276	11.8948	109.941	2	13	158355	4895.09	9.01453	441.269	2	11	3783	303079	6.51564	19747.5
2014	NV	Nevada	2014_NV	145304	7.9	2818935	1	0	51545.6	45.67	3.117	4.37	46.16	0		2.48	20.4885	5.1	0.685487		167	172458		2	12	1110535	894.203	12.9326	115.644	2	13	157984	4967.85	9.47144	470.527	2	11	3691	310049	7.11673	22065.4
2015	NV	Nevada	2015_NV	151056	6.8	2868531	1	0	52659.7	42.6	1.822	2.62	44.13	0		2.47	12.0877	3.38436	0.669639	29816				2	12	1126220	912.976	12.7576	116.474	2	13	160492	4991.94	9.25143	461.826	2	12	3682	318188	6.74756	21469.9
2016	NV	Nevada	2016_NV	156007	5.7	2919555	1	0	53435.3	40.39	1.702	2.52	42.43	0		2.21434	11.3093	3.29247	0.656367	24320		218506		2	19	1143667	924.799	11.4058	105.481	2	13	161594	5120.38	7.93492	406.298	2	12	3654	308229	5.87911	18121.1
2017	NV	Nevada	2017_NV	163199	5.1	2972097	1	0	54910.4	39.08	2.23	2.99	38.8	0		2.18759	14.7344	3.38	0.628028			204142		2	12	1263101	853.507	11.9852	102.294	2	13	163356	5674.09	7.96338	451.849	2	12	3447	304360	6.15343	18728.6
2018	NV	Nevada	2018_NV	168638	4.6	3030725	1	0	55643	39.08	2.6	3.15	38.81	0		2.18759	17.1346	3.16	0.628106			207309		2	20	1183660	947	11.85	112.18	2	13	164982	6123.85	7.74199	474.108	2	12	3446	294986	6.1	18002.6
2019	NV	Nevada	2019_NV	175771		3090771	1	0	56869.7	38.52	2.449	2.56	35.59	0		2.17615	16.25	3.07	0.602968					2	16	1204996	890	12	106.83	2	18	167628	5807	8.04	466.74	2	15	3265	317140	6.13918	19469.8
2020	NV	Nevada	2020_NV	165794			1	0		36.13	1.891	2.03	33.27	0		2.12733	12.5353	2.84222	0.584856					1	1	1226566	973.015	11.3423	110.362	2	11	169743	5883.28	7.44761	438.164	2	9	3316	299673	5.61271	16819.8
2006	NY	New York	2006_NY	1.33957e+06	4.5	19104631	0	1	70117.5	41.9669	2.137	6.73	18.61	1	4.24	2.24655	14.1311	7.6	0.49			395505		8	60	6829269	590.922	16.8939	99.8296	8	60	1004967	6304.4	15.5112	977.889	8	50	9115	136921	9.3922	12859.9
2007	NY	New York	2007_NY	1.3538e+06	4.6	19132335	0	1	70759.7	41.9669	2.286	6.97	32.78	1	4.55	2.24655	15.0977	7.92	0.46			416890		8	60	6933304	604	17.0988	103.25	8	60	1016069	6096	15.9153	970.18	7	48	12834	131244	8.71233	11434.4
2008	NY	New York	2008_NY	1.3281e+06	5.4	19212436	0	1	69126.9	40.69	2.983	8.86	45.88	1	5.66	2.22047	19.6192	10.64	0.48			407253		8	60	6897087	592	18.2981	108.41	8	60	1032105	6251	16.8375	1052.45	7	48	8779	139398	10.1369	14130.6
2009	NY	New York	2009_NY	1.3795e+06	8.3	19307066	0	1	71450.8	43.33	2.141	3.94	45.86	1	3.12	2.2744	14.1571	5.16	0.56			375594		8	60	6916413	581	17.5	101.71	8	60	1034835	6068	15.51	940.83	7	48	8565	130537	8.98	11728.2
2010	NY	New York	2010_NY	1.44035e+06	8.6	19399956	0	1	74244.8	44.27	2.705	4.37	49.29	1	3.51	2.2936	15.96	5.62	0.64					8	60	6954916	610	18.74	114.39	8	60	1038260	6202	16.31	1011.56	7	48	8364	134310	8.78	11796
2011	NY	New York	2011_NY	1.44035e+06	8.3	19499921	0	1	73864.2	45.02	3.467	4	55.64	1	3.51	3.27	22.7589	5.44	0.68					8	60	6987631	611	18.26	111.59	8	60	1035992	6146	15.81	971.64	7	48	8222	136019	7.83	10656.8
2012	NY	New York	2012_NY	1.49628e+06	8.5	19574362	0	1	76440.8	45.77	3.58	2.75	54.99	1	2.93	3.12	23.56	3.84	0.74					8	22	7010740	602.546	17.6158	106.143	8	21	1038268	6101.34	15.0563	918.639	7	15	8144	140240	6.69594	9390.35
2013	NY	New York	2013_NY	1501818	7.7	19626488	0	1	76520	45.02	3.483	3.73	51.99	1	3.58	2.30892	22.8627	4.40433	0.8				467651	8	22	7027866	602.096	18.7948	113.163	8	21	1040398	6114.83	15.3541	938.876	7	16	7960	187510	6.58474	12347
2014	NY	New York	2014_NY	1.53538e+06	6.3	19653431	0	1	78122.5	45.67	3.117	4.37	46.16	1	3.85	3.03	23.67	5.27	0.76		4799			8	21	7046829	590.986	20.0727	118.627	8	21	1045571	6100.4	16.1231	983.576	7	15	7862	190823	6.57811	12552.5
2015	NY	New York	2015_NY	1.56584e+06	5.3	19657321	0	1	79656.6	42.6	1.822	2.62	44.13	1	2.72	2.83	12.0877	3.38436	0.72		4813		466457	8	21	7079097	600.509	18.5369	111.316	8	21	1055136	6081.81	15.305	930.823	7	15	7630	197457	6.30876	12457.1
2016	NY	New York	2016_NY	1.59057e+06	4.9	19636391	0	1	81001	40.39	1.702	2.52	42.43	1		2.37	10.23	3.29247	0.69	15631	1981			8	32	7118901	595.027	17.575	104.576	8	22	1072896	5942.4	14.4486	858.596	7	15	7646	193012	6.0295	11637.6
2017	NY	New York	2017_NY	1.6248e+06	4.7	19593849	0	1	82924	39.08	2.23	2.99	38.8	1	2.48	2.35	13.96	3.72435	0.74				441029	8	22	7144413	572.484	18.0298	103.218	8	22	1089889	5760.03	14.7495	849.572	6	14	6997	212132	5.92482	12568.4
2018	NY	New York	2018_NY	1.66519e+06	4.1	19544098	0	1	85201.5	39.08	2.6	3.15	38.81	1		2.18759	17.1346	3.76	0.71					8	31	7190906	604	18.52	111.93	8	22	1106650	5779.11	14.4999	837.965	6	14	6884	218826	6.02	13168.5
2019	NY	New York	2019_NY	1.70975e+06		19463131	0	1	87845.6	38.52	2.449	2.56	35.59	1		2.17615	16.1551	3.32923	0.602968					8	59	7235400	577	17.94	103.6	8	59	1121107	5582	14.06	784.69	6	46	7607	192240	5.61322	10790.9
2020	NY	New York	2020_NY	1.65057e+06			0	1		36.13	1.891	2.03	33.27	1		2.09	12.5353	2.84222	0.64	1647			401441	1	1	7239162	601.556	18.3646	110.473	8	15	1143347	5028.28	14.5602	732.125	7	12	7535	183703	5.54445	10185.3
2006	OH	Ohio	2006_OH	582638	5.4	11481213	0	0	50747	41.9669	2.137	6.73	18.61	1		2.24655	11.72	7.16101	0.39					7	116	4892005	875.156	9.34451	81.7791	7	116	605189	6353.48	8.43728	536.061	8	99	21537	216176	5.60759	12122.2
2007	OH	Ohio	2007_OH	585403	5.6	11500468	0	0	50902.5	41.9669	2.286	6.97	32.78	1		2.24655	16.16	7.38155	0.41					7	116	4894635	926	9.57035	88.6	7	116	609250	6583	8.67458	571.05	8	99	21346	231187	5.76341	13324.2
2008	OH	Ohio	2008_OH	580389	6.4	11515391	0	0	50401.2	40.69	2.983	8.86	45.88	1		2.22047	20.65	9.11825	0.48					7	116	4891891	910	10.0565	91.5	7	116	612492	6437	9.22411	593.74	8	99	21201	230416	6.18992	14262.6
2009	OH	Ohio	2009_OH	550982	10.3	11528896	0	0	47791.4	43.33	2.141	3.94	45.86	1		2.2744	12.71	4.5973	0.683145					7	116	4880393	878	10.67	93.66	7	116	613740	6160	9.65	594.58	8	98	21088	195553	6.71	13117.6
2010	OH	Ohio	2010_OH	580251	10.3	11539449	0	1	50284.2	44.27	2.705	4.37	49.29	1		2.2936	16.75	4.99242	0.709922				165192	7	116	4877229	931	11.32	105.33	7	116	612974	6325	9.73	615.73	8	96	20693	213878	6.4	13682.6
2011	OH	Ohio	2011_OH	580251	8.8	11545735	0	1	50256.8	45.02	3.467	4	55.64	1		2.30892	22.32	4.65243	0.759496					6	115	4874482	918	11.42	104.86	6	115	611235	6423	9.63	618.26	7	98	19712	227921	6.12	13943.6
2012	OH	Ohio	2012_OH	586541	7.4	11550971	0	1	50778.5	45.77	3.58	2.75	54.99	1		2.32424	23.492	3.50382	0.754422					6	59	4869305	894.853	11.7589	105.225	6	58	613259	6353.47	9.47184	601.791	7	51	19602	226930	6.23521	14149.5
2013	OH	Ohio	2013_OH	603057	7.5	11579692	0	1	52078.9	45.02	3.483	3.73	51.99	1		2.25	22.88	3.82	0.731001					6	59	4875346	891.528	12.0102	107.074	6	59	613964	6341.02	9.34862	592.798	7	51	19360	221191	6.22031	13758.7
2014	OH	Ohio	2014_OH	624973	5.8	11606573	0	1	53846.5	45.67	3.117	4.37	46.16	1		2.16	20.4885	4.99242	0.77	917014	3412			6	58	4882159	901.315	12.4955	112.624	6	58	619293	6325.03	9.82519	621.447	7	51	19209	220510	6.76956	14927.5
2015	OH	Ohio	2015_OH	633275	4.9	11622315	0	1	54487.8	42.6	1.822	2.62	44.13	1		2.12	13.54	2.28	0.669639			220671		6	58	4892916	876.998	12.799	112.247	6	58	620810	6325.6	10.0653	636.693	7	51	19151	219991	7.01932	15441.9
2016	OH	Ohio	2016_OH	638158	5	11640060	0	1	54824.2	40.39	1.702	2.52	42.43	1		2.21434	11.3093	2.23	0.68		2423	225084	175893	6	59	4911597	891.159	12.4728	111.152	6	58	623730	6378.6	9.97454	636.236	7	51	19095	219476	6.97649	15311.7
2017	OH	Ohio	2017_OH	652188	5	11665706	0	1	55906.4	39.08	2.23	2.99	38.8	1		1.92	14.7344	2.9	0.628028		2117	219682		6	57	4936471	840.606	12.6257	106.133	6	57	627167	6133.18	10.0523	616.527	7	51	18664	226151	6.9162	15641.1
2018	OH	Ohio	2018_OH	656212	4.6	11680892	0	1	56178.2	39.08	2.6	3.15	38.81	1		1.77	16.35	3.87138	0.72	603705	2569	341399	191483	6	59	4964855	914	12.56	114.8	6	58	630210	6240.19	10.1052	630.586	7	52	18715	228141	7.01	15993
2019	OH	Ohio	2019_OH	674123		11696507	0	1	57634.6	38.52	2.449	2.56	35.59	1		1.79	16.1551	3.32923	0.602968					6	113	4980931	874	12.38	108.15	6	113	632794	6059	9.72	588.65	7	100	19798	211508	6.55174	13857.4
2020	OH	Ohio	2020_OH	654586			0	1		36.13	1.891	2.03	33.27	1		2.12733	12.5353	2.84222	0.64				190316	1	1	5014959	873.267	12.287	107.298	6	38	636519	5656.31	9.52719	538.887	7	38	19746	197607	6.15949	12171.6
2006	OK	Oklahoma	2006_OK	149367	4	3594090	0	0	41559.1	41.9669	2.137	6.73	18.61	1		1.09	13.31	7.16101	0.470406					4	96	1616987	1117.84	8.54879	95.5618	4	96	249947	6066.84	7.34298	445.487	4	65	17810	70270.7	5.45517	3833.38
2007	OK	Oklahoma	2007_OK	152880	4.1	3634349	0	0	42065.2	41.9669	2.286	6.97	32.78	1		1.17	16.39	7.38155	0.58103					3	95	1617944	1100	8.58456	94.45	3	95	258573	6006	7.33324	440.4	3	63	17579	72047	5.414	3900.63
2008	OK	Oklahoma	2008_OK	158988	3.7	3668976	0	0	43333	40.69	2.983	8.86	45.88	1		1.32	15.55	9.11825	0.683301					3	95	1633265	1115	9.09034	101.39	3	95	264439	5995	7.8779	472.24	3	65	17620	72812	5.89617	4293.14
2009	OK	Oklahoma	2009_OK	156857	6.4	3717572	0	0	42193.3	43.33	2.141	3.94	45.86	1		2.2744	14.13	4.5973	0.683145					3	95	1643674	1097	8.49	93.13	3	94	266110	5844	6.76	394.92	3	66	17752	66816	4.82	3220.54
2010	OK	Oklahoma	2010_OK	163859	6.8	3760014	0	0	43579.4	44.27	2.705	4.37	49.29	1		1.71	17.8158	4.99242	0.709922					3	95	1660653	1189	9.14	108.61	3	97	261932	6046	7.45	450.19	3	63	18356	68788	5.35	3680.85
2011	OK	Oklahoma	2011_OK	163859	5.9	3788824	0	0	43248.1	45.02	3.467	4	55.64	1	2.91	1.76	22.7589	4.45	0.759496					3	95	1667223	1221	9.47	115.61	3	94	264782	6173	7.6	468.9	3	64	18242	72218	5.46	3943.34
2012	OK	Oklahoma	2012_OK	172016	5.2	3819320	0	0	45038.4	45.77	3.58	2.75	54.99	1	2.48	1.97	22.77	2.96	0.754422	315553		326477		3	50	1679296	1131.91	9.50602	107.599	3	50	268014	6206.5	7.31979	454.303	3	44	18242	75694.4	5.08687	3850.48
2013	OK	Oklahoma	2013_OK	176087	5.3	3853891	0	0	45690.7	45.02	3.483	3.73	51.99	1	2.89	2.30892	22.33	3.98	0.731001		105	256717		3	50	1693151	1141.85	9.67427	110.466	3	49	271698	6086.15	7.76692	472.706	3	44	18471	76182.8	5.49155	4183.62
2014	OK	Oklahoma	2014_OK	186574	4.5	3879187	0	0	48096.3	45.67	3.117	4.37	46.16	1	3.18	1.96	21.15	4.99	0.685487	322770		215996		3	49	1710352	1137.74	10.0346	114.167	3	50	275276	6190.39	8.09004	500.805	3	44	18238	81210.7	5.84514	4746.88
2015	OK	Oklahoma	2015_OK	193793	4.4	3910518	0	0	49556.8	42.6	1.822	2.62	44.13	1	2.47	2.25949	12.0877	2.97	0.669639					3	49	1723938	1093.22	10.1415	110.87	3	50	277386	6216.1	7.67512	477.093	3	43	18688	80396.8	5.34863	4300.12
2016	OK	Oklahoma	2016_OK	190094	4.8	3928143	0	1	48392.7	40.39	1.702	2.52	42.43	1		1.91	11.3093	3.29247	0.656367					3	49	1736819	1093.46	10.1957	111.486	3	48	278027	6203.15	7.66207	475.29	3	42	19096	78686.4	5.01804	3948.51
2017	OK	Oklahoma	2017_OK	192539	4.2	3933602	0	2	48947.1	39.08	2.23	2.99	38.8	1		2.18759	14.7344	3.18	0.628028			237898		3	48	1751034	1039.27	10.6101	110.267	3	48	281267	6073.37	8.10702	492.369	3	42	18782	80554.4	5.42024	4366.24
2018	OK	Oklahoma	2018_OK	196030	3.4	3943488	0	2	49709.9	39.08	2.6	3.15	38.81	1		1.77	16.2	2.73	0.628106	164264	179	336184		3	49	1764980	1139	10.3	117.28	3	49	282875	6253.98	8.06856	504.606	3	42	18700	85692	5.34	4578.09
2019	OK	Oklahoma	2019_OK	199462		3960676	0	2	50360.6	38.52	2.449	2.56	35.59	1		2.17615	16.1551	3.32923	0.602968					3	89	1777156	1116	10.21	113.93	3	87	285641	5860	7.98	467.79	3	58	19905	87515.6	5.06657	4434.04
2020	OK	Oklahoma	2020_OK	190752			0	2		36.13	1.891	2.03	33.27	1		2.12733	12.5353	2.84222	0.584856					1	1	1795629	1078.2	10.1157	109.067	3	34	290192	5369.72	7.82423	420.139	3	30	20468	82925.6	4.60996	3822.84
2006	OR	Oregon	2006_OR	177222	5.3	3670883	0	0	48277.9	41.9669	2.137	6.73	18.61	0	4.88	1.3	14.06	7.16101	0.470406		66	77038		3	40	1577005	1002.83	7.47595	74.9709	3	40	228472	5866.01	6.76698	396.952	3	36	21780	49705.3	4.8518	2411.6
2007	OR	Oregon	2007_OR	180724	5.2	3722417	0	1	48550.3	41.9669	2.286	6.97	32.78	0	5.01	1.38	16.19	7.38155	0.58103		52	104874		3	40	1599912	1009	8.18528	82.6	3	41	230792	5845	7.19988	420.8	3	36	22278	49067	5.06041	2483.01
2008	OR	Oregon	2008_OR	184843	6.5	3768748	0	1	49046.2	40.69	2.983	8.86	45.88	0	5.65	1.45	9.76	9.11825	0.683301		124	119029		3	40	1616598	1026	8.49242	87.16	3	40	234525	5797	7.29168	422.67	3	36	22394	48172	5.21012	2509.83
2009	OR	Oregon	2009_OR	176952	11.3	3808600	0	1	46461.1	43.33	2.141	3.94	45.86	0	3.73	1.76	9.67	4.5973	0.683145		33	111098		3	40	1623388	1017	8.68	88.23	3	40	236230	5636	7.49	421.92	3	36	22485	43589	5.45	2376.08
2010	OR	Oregon	2010_OR	185959	10.6	3837614	0	1	48457	44.27	2.705	4.37	49.29	0	3.76	1.67	16.27	4.99242	0.709922		34	111386		3	40	1629076	964	8.87	85.52	3	40	238450	5401	7.59	409.87	3	36	22638	43100	5.41	2330.44
2011	OR	Oregon	2011_OR	185959	9.5	3872672	0	1	48018.4	45.02	3.467	4	55.64	0		2.30892	22.7589	4.04	0.759496			61347		3	40	1633551	991	9.54	94.51	3	40	238908	5495	8.15	447.99	3	36	23300	42787	5.47	2338.89
2012	OR	Oregon	2012_OR	187352	8.8	3900102	0	1	48037.8	45.77	3.58	2.75	54.99	0		2.32424	23.492	3.09	0.754422					3	38	1642444	956.636	9.80485	93.7967	3	37	237780	5538.67	8.31136	460.339	3	34	23303	42932.9	5.58674	2398.55
2013	OR	Oregon	2013_OR	189610	7.9	3924110	0	1	48319.2	45.02	3.483	3.73	51.99	0		2.30892	22.05	3.81	0.731001		60			3	38	1650803	975.715	9.89798	96.5761	3	37	235191	5697.62	8.68029	494.57	3	34	23392	43496.3	5.7985	2522.14
2014	OR	Oregon	2014_OR	195808	6.8	3965447	0	1	49378.6	45.67	3.117	4.37	46.16	0		2.3222	20.4885	4.99242	0.685487					3	37	1669124	929.51	10.4671	97.2931	3	37	229832	5815.63	8.75151	508.955	3	34	23356	45150.7	5.96955	2695.29
2015	OR	Oregon	2015_OR	205582	5.6	4018542	0	1	51158.3	42.6	1.822	2.62	44.13	0		2.25949	12.0877	2.75	0.669639			118345		3	37	1686973	902.455	10.6646	96.2431	3	37	229116	5827.13	8.80358	512.996	3	34	25242	42752.1	5.96929	2551.99
2016	OR	Oregon	2016_OR	214769	4.8	4093271	0	1	52468.9	40.39	1.702	2.52	42.43	0		2.21434	11.3093	3.29247	0.656367		49	111722		3	41	1706622	906.92	10.6638	96.7122	3	37	231692	5776.52	8.90772	514.556	3	33	24628	42944.4	6.05411	2599.9
2017	OR	Oregon	2017_OR	225534	4.1	4147294	0	1	54381.1	39.08	2.23	2.99	38.8	0	2.63	2.18759	14.7344	2.45	0.628028			109689		3	37	1725884	968.872	10.6574	103.256	3	37	233823	5905.73	8.85597	523.01	3	33	24383	45734.8	5.98466	2737.07
2018	OR	Oregon	2018_OR	234308	4.2	4183538	0	1	56007.2	39.08	2.6	3.15	38.81	0		2.34	17.24	2.23	0.628106	15495				3	40	1750240	901	10.98	99	3	37	237942	5768.22	8.91189	514.057	3	33	24885	46618	5.86	2733.58
2019	OR	Oregon	2019_OR	239910		4216116	0	1	56903.2	38.52	2.449	2.56	35.59	0		2.17615	16.1551	3.32923	0.602968					3	40	1763783	911	11.01	100.35	3	41	240488	5691	8.85	503.5	3	36	25169	48566	5.85563	2843.84
2020	OR	Oregon	2020_OR	237670			0	1		36.13	1.891	2.03	33.27	0		2.12733	12.5353	2.84222	0.584856					1	1	1785131	916.273	11.167	102.321	3	24	239645	5476.47	9.00337	493.067	3	23	26353	49383.3	5.69619	2812.97
2006	PA	Pennsylvania	2006_PA	626590	4.6	12510809	0	0	50083.9	41.9669	2.137	6.73	18.61	1		1.71	14.1311	7.16101	0.470406		3778			11	59	5190697	831.457	10.3475	86.0352	11	57	665763	5710.69	8.94487	510.813	10	44	28272	141248	6.6338	9370.12
2007	PA	Pennsylvania	2007_PA	649638	4.4	12563937	0	0	51706.6	41.9669	2.286	6.97	32.78	1		1.74	15.0977	7.38155	0.58103		4845			11	59	5207370	874	10.9494	95.65	11	57	667419	5935	9.20396	546.23	10	44	27857	145323	6.8703	9984.12
2008	PA	Pennsylvania	2008_PA	665148	5.3	12612285	0	1	52738.1	40.69	2.983	8.86	45.88	1		2.09	19.6192	9.11825	0.683301		4591			11	59	5231696	861	11.3521	97.75	11	57	676337	5834	9.37866	547.13	10	45	27540	145639	7.01935	10222.9
2009	PA	Pennsylvania	2009_PA	645207	8	12666858	0	1	50936.6	43.33	2.141	3.94	45.86	1		2.29	14.1571	4.5973	0.683145		3421			11	59	5235331	842	11.65	98.09	11	57	679215	5694	9.54	543.37	10	45	27412	132399	7.21	9541.18
2010	PA	Pennsylvania	2010_PA	676468	8.5	12711406	0	2	53217.4	44.27	2.705	4.37	49.29	1		2.4	16.26	4.99242	0.709922		4243			11	59	5244278	878	12.7	111.5	11	57	678774	5815	10.1	587.19	10	45	27293	138795	7.66	10629.5
2011	PA	Pennsylvania	2011_PA	676468	7.9	12747052	0	2	53068.6	45.02	3.467	4	55.64	1		2.30892	22.7589	4.65243	0.759496					11	59	5249827	870	13.26	115.33	11	57	684757	5298	10.03	531.26	10	46	25047	164975	7.73	12755.1
2012	PA	Pennsylvania	2012_PA	689007	7.8	12769123	0	2	53958.8	45.77	3.58	2.75	54.99	1		2.32424	23.492	3.50382	0.754422					11	26	5261381	837.487	12.7499	106.778	11	25	687750	5200.51	9.43714	490.779	10	24	24963	160367	7.22802	11591.3
2013	PA	Pennsylvania	2013_PA	704195	7.4	12779538	0	2	55103.3	45.02	3.483	3.73	51.99	1	2.16	2.47	22.8627	4	0.82	905843	3294		822483	11	26	5272857	857.408	12.7892	109.656	11	25	689355	5215.63	9.24992	482.441	10	24	24601	162741	6.96872	11341
2014	PA	Pennsylvania	2014_PA	718692	5.9	12792392	0	2	56181.2	45.67	3.117	4.37	46.16	1		2.51	23.67	4.84	0.78	814266			823277	11	25	5289211	853.866	13.3182	113.719	11	25	690549	5231.09	9.72505	508.726	10	24	24222	166232	7.41134	12320
2015	PA	Pennsylvania	2015_PA	734145	5.3	12789838	0	2	57400.7	42.6	1.822	2.62	44.13	1		2.25949	12.0877	2.42	0.669639	669244		456219		11	25	5304279	854.949	13.6408	116.622	11	25	690881	5276.5	9.59923	506.503	10	24	23731	166464	7.19727	11980.9
2016	PA	Pennsylvania	2016_PA	744847	5.4	12788468	0	2	58243.7	40.39	1.702	2.52	42.43	1		2.21434	11.3093	3.29247	0.656367			520118		11	32	5335555	841.48	13.8649	116.67	11	25	696080	5211.98	9.21978	480.533	10	24	23372	168036	6.92216	11631.7
2017	PA	Pennsylvania	2017_PA	754318	4.9	12794679	0	2	58955.6	39.08	2.23	2.99	38.8	1		1.88	14.7344	2.56	0.74	501784	2985	544924		11	25	5356693	804.671	14.2274	114.483	11	25	698453	5085.35	8.9774	456.533	10	24	22726	175603	6.76926	11887
2018	PA	Pennsylvania	2018_PA	763855	4.3	12809107	0	2	59633.8	39.08	2.6	3.15	38.81	1	1.81	2.09	17.1346	3.87138	0.628106	467959			872749	11	32	5390428	864	13.89	120.04	11	25	716936	5023.87	8.94069	449.169	10	24	11743	348828	6.84	23855.2
2019	PA	Pennsylvania	2019_PA	772530		12798883	0	2	60359.1	38.52	2.449	2.56	35.59	1	1.54	2.17615	16.1551	3.32923	0.68					11	59	5418870	837	13.8	115.47	11	58	716992	4666	8.71	406.56	10	43	13788	304750	6.4064	19523.5
2020	PA	Pennsylvania	2020_PA	736471			0	2		36.13	1.891	2.03	33.27	1		2.12733	12.5353	2.84222	0.584856	256047				1	1	5448109	845.968	13.5823	114.902	11	21	720919	4089.8	8.49721	347.519	10	20	15462	261972	6.16028	16138.2
2006	RI	Rhode Island	2006_RI	57415.8	4.9	1063096	1	0	54008.1	41.9669	2.137	6.73	18.61	1		2.24655	14.06	7.16101	0.470406					2	3	427599	586.305	15.1153	88.6218	2	3	54897	5463.77	13.5081	738.049	1	2	2290	43353.4	12.5108	5423.87
2007	RI	Rhode Island	2007_RI	56230.5	5.2	1057315	1	0	53182.4	41.9669	2.286	6.97	32.78	1		2.24655	15.77	7.38155	0.58103					2	3	429504	608	14.0476	85.36	2	3	55660	5555	12.6704	703.82	1	2	2252	43334	12.0416	5218.07
2008	RI	Rhode Island	2008_RI	54977.1	7.8	1055003	1	0	52110.8	40.69	2.983	8.86	45.88	1		2.22047	20.27	9.11825	0.683301					2	3	430152	589	17.448	102.85	2	3	55906	5516	15.3579	847.12	1	2	2048	43761	14.2028	6215.25
2009	RI	Rhode Island	2009_RI	54481.5	11	1053646	1	0	51707.6	43.33	2.141	3.94	45.86	1		2.2744	11.84	4.5973	0.683145					2	3	432102	566	15.6	88.35	2	3	56385	5455	13.67	745.38	1	2	2014	40974	12.25	5018.34
2010	RI	Rhode Island	2010_RI	56026.6	11.2	1053994	1	0	53156.5	44.27	2.705	4.37	49.29	1		2.2936	16.5	4.99242	0.709922					2	3	430623	603	15.92	96.08	2	3	56664	5432	13.11	711.85	1	2	1975	40541	11.82	4790.96
2011	RI	Rhode Island	2011_RI	56026.6	11	1053829	1	0	53164.8	45.02	3.467	4	55.64	1	5.18	2.30892	22.15	5.01	0.759496					2	3	432430	603	14.33	86.44	2	3	57409	5313	12.37	657.14	1	2	1958	38979	11.27	4394.53
2012	RI	Rhode Island	2012_RI	56487.4	10.4	1054893	1	0	53548	45.77	3.58	2.75	54.99	1	3.88	2.32424	23.43	3.86	0.754422			62455		2	3	435448	597.348	14.4041	86.0423	2	3	57824	5245.61	11.8672	622.51	1	2	1927	39935.9	10.6767	4263.85
2013	RI	Rhode Island	2013_RI	57037.2	9.3	1055560	1	0	54035	45.02	3.483	3.73	51.99	1	5.8	2.30892	22.8627	5.66	0.731001			47877		2	3	438198	601.838	15.1994	91.4757	2	3	58317	5240.17	12.9175	676.902	1	2	1913	40203.5	11.822	4752.84
2014	RI	Rhode Island	2014_RI	57602.7	7.7	1056511	1	0	54521.6	45.67	3.117	4.37	46.16	1		2.3222	20.4885	4.99242	0.685487					2	3	438879	582.99	17.1679	100.087	2	3	58346	5224.12	14.5606	760.661	1	2	1884	39240.5	12.8626	5047.36
2015	RI	Rhode Island	2015_RI	58387.9	6	1056886	1	0	55245.2	42.6	1.822	2.62	44.13	1		2.25949	16.73	3.62	0.669639					2	3	440191	593.588	19.2896	114.501	2	3	58903	5241.4	15.7764	826.902	1	2	1853	35911.7	13.7585	4940.91
2016	RI	Rhode Island	2016_RI	58630	5.2	1057816	1	0	55425.5	40.39	1.702	2.52	42.43	1		2.21434	11.3093	3.29247	0.656367		245			2	3	438507	585.616	18.6159	109.018	2	3	58907	5165.37	14.8766	768.434	1	2	1821	34976	13.4826	4715.66
2017	RI	Rhode Island	2017_RI	58771.6	4.4	1056554	1	0	55625.7	39.08	2.23	2.99	38.8	1		2.18759	14.7344	3.72435	0.628028			52231		2	3	437124	577.309	18.3191	105.758	2	3	59447	5050.84	15.1967	767.559	1	2	1784	33901.7	14.565	4937.78
2018	RI	Rhode Island	2018_RI	58740.1	4.1	1059338	1	0	55449.8	39.08	2.6	3.15	38.81	1		2.18759	15.87	4.09	0.628106		653	58882		2	8	442005	589	20.55	121.05	2	3	60128	5124.6	16.5806	849.691	1	2	1773	34528	15.39	5313.53
2019	RI	Rhode Island	2019_RI	59866.6		1058158	1	0	56576.2	38.52	2.449	2.56	35.59	1		2.17615	16.1551	3.32923	0.602968					1	3	444216	560	21.73	121.62	1	3	60672	5006	16.38	820.14	1	2	1758	32964.4	15.5895	5138.99
2020	RI	Rhode Island	2020_RI	58155.2			1	0		36.13	1.891	2.03	33.27	1		2.12733	12.5353	2.84222	0.584856					1	1	441573	594.092	22.0087	130.752	1	3	60057	4927.63	15.9427	785.599	1	2	1692	31259.5	15.7578	4925.79
2006	SC	South Carolina	2006_SC	187386	6.4	4357847	0	0	42999.7	41.9669	2.137	6.73	18.61	0		2.24655	14.92	7.75	0.39	393028		52155	530071	4	47	1989801	1195.22	9.02709	107.894	4	46	329528	5291.03	7.60463	402.363	4	35	4462	586727	4.71347	27655.2
2007	SC	South Carolina	2007_SC	193387	5.7	4444110	0	0	43515.3	41.9669	2.286	6.97	32.78	0		2.24655	15.87	7.86	0.38	411139		52654		4	47	2035713	1210	9.18662	111.2	4	47	337586	5368	7.74444	415.73	4	35	4657	548143	4.82904	26470
2008	SC	South Carolina	2008_SC	192497	6.8	4528996	0	0	42503.3	40.69	2.983	8.86	45.88	0		2.22047	18.2	10.12	0.4	415401		47814		4	47	2068598	1198	9.88652	118.4	4	47	342187	5279	8.42323	444.65	4	34	4691	519560	5.36698	27884.7
2009	SC	South Carolina	2009_SC	184081	11.2	4589872	0	0	40106	43.33	2.141	3.94	45.86	0		2.2744	13.36	4.01	0.47	348711		77142		4	47	2083432	1182	10.44	123.47	4	47	343793	5197	8.74	454.02	4	34	4501	470662	5.79	27251.1
2010	SC	South Carolina	2010_SC	193221	11.2	4635846	0	0	41679.8	44.27	2.705	4.37	49.29	0		2.2936	17.8158	4.77	0.709922	381051		89532		4	47	2089302	1310	10.5	137.59	4	47	340365	5465	8.9	486.35	4	34	4477	508284	5.74	29184.1
2011	SC	South Carolina	2011_SC	193221	10.6	4672655	0	0	41351.4	45.02	3.467	4	55.64	0		2.30892	22.7589	4.26	0.759496			103331		4	47	2101585	1221	11.05	135.01	4	47	340193	5289	9.3	491.76	4	34	4459	525043	5.94	31188.3
2012	SC	South Carolina	2012_SC	195406	9.2	4719027	0	1	41408.1	45.77	3.58	2.75	54.99	0	2.03	3.97	23.15	3.62	0.63	285684		119127	535952	4	41	2113144	1118.64	11.7678	131.64	4	40	342761	5166.56	9.62788	497.43	4	32	4392	534380	6.02056	32172.7
2013	SC	South Carolina	2013_SC	200147	7.6	4766469	0	1	41990.7	45.02	3.483	3.73	51.99	0	1.93	2.30892	23.1	4.58	0.68		1051		566879	4	41	2135432	1124.38	11.9938	134.856	4	40	346026	5086.37	9.8772	502.391	4	32	4479	533404	6.00955	32055.2
2014	SC	South Carolina	2014_SC	206078	6.5	4826858	0	1	42694	45.67	3.117	4.37	46.16	0		2.3222	22.6	4.91	0.64	291282	2720			4	40	2157091	1186.63	12.4505	147.741	4	40	349432	5164.47	10.2771	530.76	4	33	4566	533804	6.29086	33580.9
2015	SC	South Carolina	2015_SC	213212	6	4896006	0	1	43548.2	42.6	1.822	2.62	44.13	0	1.79	2.25949	12.0877	3.37	0.66				555909	4	40	2185965	1145.92	12.57	144.042	4	40	357724	5107.99	10.2143	521.744	4	32	4290	569970	6.04606	34460.7
2016	SC	South Carolina	2016_SC	220559	5	4963031	0	1	44440.4	40.39	1.702	2.52	42.43	0		2.21434	11.17	3.28	0.656367		969		583883	4	43	2209783	1154.55	12.6531	146.086	4	40	369409	5024.91	10.2759	516.355	4	32	4062	547493	6.0908	33346.7
2017	SC	South Carolina	2017_SC	224938	4.3	5027102	0	1	44745	39.08	2.23	2.99	38.8	0		3.3	14.7344	3.72435	0.7				568390	4	40	2251558	1081.66	13.0172	140.801	4	40	373073	4860.1	10.5748	513.947	4	32	4379	515980	6.18672	31922.2
2018	SC	South Carolina	2018_SC	231663	3.4	5091702	0	1	45498.2	39.08	2.6	3.15	38.81	0		3.33	17.22	4.18	0.65		3367	178054	551151	4	43	2290200	1159	12.44	144.2	4	40	376842	4916.48	10.1091	497.013	4	32	4573	504811	6.1	30794.6
2019	SC	South Carolina	2019_SC	237511		5157702	0	1	46049.8	38.52	2.449	2.56	35.59	0		2.17615	16.1551	3.18	0.62					4	47	2330903	1114	12.99	144.73	4	47	385285	4795	10.58	507.11	4	34	3703	604855	6.11321	36976
2020	SC	South Carolina	2020_SC	233712			0	1		36.13	1.891	2.03	33.27	0		2.12733	12.5353	2.84222	0.61					1	1	2377020	1080.7	12.7843	138.159	4	31	395288	4392.23	10.351	454.64	4	27	3714	562664	5.97869	33639.9
2006	SD	South Dakota	2006_SD	39961.6	3.1	783033	1	0	51034.4	41.9669	2.137	6.73	18.61	0		1.51	15.46	8.65	0.470406	34967	109			6	69	353053	956.167	7.83304	74.8969	6	71	64084	5271.46	6.46706	340.908	5	39	2359	68943.9	4.83849	3335.84
2007	SD	South Dakota	2007_SD	41646.2	2.8	791623	1	0	52608.6	41.9669	2.286	6.97	32.78	0		1.56	17.01	7.63	0.58103	28632	808			6	69	358396	991	8.07332	79.98	6	72	64767	5380	6.61001	355.6	6	39	2956	60935	5.09107	3102.25
2008	SD	South Dakota	2008_SD	43278.5	3.1	799124	1	0	54157.4	40.69	2.983	8.86	45.88	0		1.74	19.79	7.28	0.683301	39605	290			6	70	363517	1010	8.27366	83.56	6	72	65007	5436	6.96759	378.74	6	40	2984	65016	5.30703	3450.4
2009	SD	South Dakota	2009_SD	44255.8	4.9	807067	1	0	54835.3	43.33	2.141	3.94	45.86	0		1.76	12.45	5.18	0.683145	35229	137			6	70	367206	1024	8.49	86.88	6	72	65971	5354	7.14	382.27	6	41	3052	61721	5.65	3488.08
2010	SD	South Dakota	2010_SD	47630.3	5	816193	1	0	58356.7	44.27	2.705	4.37	49.29	0		1.95	18.1	5.46	0.709922	36204	104			6	70	370566	1041	8.97	93.4	6	72	66278	5492	7.55	414.71	6	42	3290	59783	6.07	3626.03
2011	SD	South Dakota	2011_SD	47630.3	4.7	823740	1	0	57822	45.02	3.467	4	55.64	0		2.09	22.7589	4.65243	0.759496	29000		1591		6	70	374260	1035	9.35	96.78	6	72	68775	5388	7.76	417.87	6	42	2905	74193	6.2	4598.82
2012	SD	South Dakota	2012_SD	48653.9	4.3	833859	1	0	58347.9	45.77	3.58	2.75	54.99	0		2.32424	23.492	3.45	0.754422					6	48	378633	980.222	10.0674	98.6828	6	49	68880	5512.74	8.09651	446.339	6	33	2891	78515.8	6.57078	5159.1
2013	SD	South Dakota	2013_SD	48610.1	3.8	842751	1	0	57680.3	45.02	3.483	3.73	51.99	0		2	22.8627	4.22	0.731001	30836		4195		6	48	381081	1054.93	10.2579	108.213	6	49	69446	5594.09	8.51247	476.195	6	34	3535	64210.4	6.9662	4473.02
2014	SD	South Dakota	2014_SD	49640.9	3.4	849670	1	0	58423.7	45.67	3.117	4.37	46.16	0		2.3222	22.7	4.99242	0.685487					6	47	384749	1045.57	10.4683	109.453	6	49	69703	5466.44	8.88871	485.895	6	35	3801	64786.3	6.98517	4525.43
2015	SD	South Dakota	2015_SD	50860.8	3.1	854663	1	0	59509.8	42.6	1.822	2.62	44.13	0	2.56	2.23	12.0877	3.38436	0.669639	16268				6	47	388374	980.868	11.0804	108.684	6	49	69872	5663.5	9.15558	518.526	5	34	3748	61855.6	7.36631	4556.47
2016	SD	South Dakota	2016_SD	51264.3	3	863693	1	0	59354.8	40.39	1.702	2.52	42.43	0		2.25	8.54	2.47	0.656367			7852		6	48	392187	981.403	11.466	112.528	6	48	70745	5534.02	9.58392	530.376	5	35	3851	60866.3	7.57038	4607.81
2017	SD	South Dakota	2017_SD	51615.1	3.2	873732	1	0	59074.3	39.08	2.23	2.99	38.8	0	2.41	2.18759	14.7344	3.72435	0.628028	22369				6	47	396564	977.751	11.768	115.062	6	48	71263	5522.58	9.73523	537.636	5	35	3892	62909.4	7.83677	4930.06
2018	SD	South Dakota	2018_SD	51937.8	3	879386	1	0	59061.4	39.08	2.6	3.15	38.81	0		1.87	17.17	2.82	0.628106					6	48	400150	1045	11.59	121.16	6	48	72106	5666.71	9.62128	545.21	5	35	3997	61380	7.77	4771.26
2019	SD	South Dakota	2019_SD	52360.1		887127	1	0	59022.1	38.52	2.449	2.56	35.59	0		2.17615	16.1551	3.32923	0.602968			9891		6	71	403717	1044	11.55	120.6	6	72	73549	5538	9.59	531.22	5	48	4089	59588	7.80816	4652.73
2020	SD	South Dakota	2020_SD	52692.1			1	0		36.13	1.891	2.03	33.27	0		2.12733	12.5353	2.84222	0.584856					1	1	407532	1036.73	11.7457	121.771	6	21	74236	5272.01	9.6514	508.823	5	19	4109	59409.1	7.79046	4628.24
2006	TN	Tennessee	2006_TN	295668	5.2	6088766	1	0	48559.6	41.9669	2.137	6.73	18.61	0	1.37	1.69	14	7	0.41	597927	1511	6877		3	90	2613978	1301.21	7.75261	100.877	2	88	448593	5393.37	8.00161	431.556	2	85	2043	1.39017e+06	5.1658	71813.3
2007	TN	Tennessee	2007_TN	294820	4.7	6175727	1	0	47738.5	41.9669	2.286	6.97	32.78	0	1.46	1.91	16.11	7.33	0.35	593402	1605	7481		3	90	2658103	1344	7.84185	105.42	2	88	456863	5469	8.09066	442.51	2	85	2067	1364713	5.19397	70882.8
2008	TN	Tennessee	2008_TN	298527	6.6	6247411	1	0	47784.1	40.69	2.983	8.86	45.88	0	1.67	2.15	15.18	9.82	0.47	564829	2252	4534		3	90	2685425	1302	8.91347	116.02	2	88	460419	5324	9.23918	491.93	2	85	2094	1305467	6.29015	82115.7
2009	TN	Tennessee	2009_TN	287309	10.5	6306019	1	0	45561	43.33	2.141	3.94	45.86	0		2.5	12.54	4.57	0.683145	409344	2011	3775		3	89	2678768	1248	9.32	116.35	2	87	454949	5122	9.61	491.97	2	84	2036	1087479	6.76	73543.3
2010	TN	Tennessee	2010_TN	301509	9.7	6355518	1	0	47440.5	44.27	2.705	4.37	49.29	0		2.64	17.04	4.94	0.709922	443767	2294	22608	289930	3	89	2704054	1393	9.23	128.58	2	87	460404	5321	9.66	513.81	2	85	2027	1189345	6.58	78270.7
2011	TN	Tennessee	2011_TN	301509	9	6400298	1	0	47108.6	45.02	3.467	4	55.64	0		2.30892	21.55	4.6	0.759496		2148			3	89	2708113	1325	9.98	132.26	2	87	463992	5213	10.27	535.22	2	84	2017	1183212	7.23	85528.1
2012	TN	Tennessee	2012_TN	311754	7.8	6455752	1	0	48290.9	45.77	3.58	2.75	54.99	0		2.32424	23.492	3.50382	0.754422					3	90	2721099	1217.45	10.1012	122.977	2	88	466513	5028.47	10.3078	518.326	2	84	1957	1.21257e+06	7.07711	85814.8
2013	TN	Tennessee	2013_TN	318348	7.8	6496943	1	0	48999.6	45.02	3.483	3.73	51.99	0	1.79	2.39	22.64	3.76	0.77	333581				3	90	2738547	1244.76	9.98165	124.247	2	88	469382	5960.78	9.99792	595.954	2	82	1191	1.57163e+06	6.29063	98865.3
2014	TN	Tennessee	2014_TN	323880	6.6	6544617	1	0	49487.9	45.67	3.117	4.37	46.16	0	1.92	2.45	17.89	4.55	0.72	365506	2049	45989	289401	3	90	2756932	1285.8	10.3249	132.757	2	88	471794	5916.66	10.3792	614.103	2	84	1271	1.58553e+06	6.40428	101542
2015	TN	Tennessee	2015_TN	335461	5.6	6595354	1	0	50863.2	42.6	1.822	2.62	44.13	0		2.39	12.4	2.72	0.72	314583	1526	70184		3	90	2783058	1247.65	10.3003	128.512	2	89	476405	6119.02	10.1569	621.5	2	84	1245	1.53836e+06	6.17176	94944
2016	TN	Tennessee	2016_TN	343545	4.7	6651277	1	0	51651	40.39	1.702	2.52	42.43	0		2.23	10.47	2.59	0.71		1359	88257	309357	3	90	2812287	1237.84	10.4122	128.886	2	89	480032	6152.18	10.1928	627.077	2	84	1193	1.64471e+06	5.6796	93412.8
2017	TN	Tennessee	2017_TN	355418	3.8	6714748	1	0	52930.9	39.08	2.23	2.99	38.8	0		2.28	12.28	3.04	0.71	295243	1406	75778	332779	3	90	2847696	1149.83	10.7234	123.302	2	89	484324	5803.14	10.5514	612.311	2	84	1167	1.72952e+06	5.83328	100888
2018	TN	Tennessee	2018_TN	362364	3.5	6778180	1	0	53460.3	39.08	2.6	3.15	38.81	0	1.53	2.16	16.21	3.17	0.68			103092	378224	3	90	2882992	1283	10.71	137.35	2	89	491567	6260.67	10.5113	658.076	2	84	1010	1782077	5.68	101294
2019	TN	Tennessee	2019_TN	370088		6830325	1	0	54183.1	38.52	2.449	2.56	35.59	0	1.47	2.14	14.27	2.85	0.65	184546	1555	118725	372992	3	89	2914916	1217	10.87	132.33	2	88	497497	6056	10.65	645.02	2	83	1016	1731014	5.67769	98281.6
2020	TN	Tennessee	2020_TN	366555			1	0		36.13	1.891	2.03	33.27	0	1.24	1.91	10.29	2.44	0.62		1209		383245	1	1	2930482	1168.32	10.7588	125.698	2	87	501589	5562.35	10.5598	587.374	2	82	1015	1.67806e+06	5.33278	89487.3
2006	TX	Texas	2006_TX	1.22515e+06	4.9	23359580	1	0	52447.3	41.9669	2.137	6.73	18.61	1		1.49	14.1311	7.16101	0.470406				430593	5	177	9102596	1161.24	12.8564	149.293	5	190	1489895	6215.78	9.85377	612.489	5	118	139100	62718	7.81848	4903.6
2007	TX	Texas	2007_TX	1.28883e+06	4.3	23831983	1	0	54079.8	41.9669	2.286	6.97	32.78	1		1.63	15.0977	7.38155	0.46				429577	5	179	9166849	1136	12.3426	140.17	5	192	1413358	6518	9.86957	643.26	5	119	168586	53534	7.79199	4171.34
2008	TX	Texas	2008_TX	1.28719e+06	4.8	24309039	1	0	52951.1	40.69	2.983	8.86	45.88	1		1.88	19.6192	9.11825	0.683301				425682	5	189	9418077	1130	13.0367	147.32	5	201	1411826	6698	10.7457	719.72	5	119	161084	54737	8.79096	4811.87
2009	TX	Texas	2009_TX	1.28556e+06	7.6	24801761	1	0	51833.4	43.33	2.141	3.94	45.86	1		2.2744	14.1571	4.5973	0.683145				434024	5	193	9484812	1140	12.38	141.2	6	204	1435073	6881	9.66	664.53	6	120	136221	59298	6.74	3997.04
2010	TX	Texas	2010_TX	1.37017e+06	8.1	25241897	1	0	54281.8	44.27	2.705	4.37	49.29	1		1.84	17.8158	4.99242	0.709922			1375275		5	193	9536778	1199	11.6	138.99	6	202	1459667	6935	9.19	637.32	6	116	127608	65144	6.44	4192.55
2011	TX	Texas	2011_TX	1.37017e+06	7.8	25645504	1	0	53427.5	45.02	3.467	4	55.64	1	2.74	1.87	22.7589	4.27	0.67	1675488		1483987	414881	6	198	9621481	1262	11.08	139.81	6	205	1363629	7835	8.83	691.5	6	117	99033	85938	6.24	5358.52
2012	TX	Texas	2012_TX	1.43835e+06	6.7	26084120	1	0	55142.9	45.77	3.58	2.75	54.99	1	2.23	1.88	23	2.93	0.73	1478692	1354	1550460	402823	6	155	9802110	1168.21	10.9799	128.269	6	155	1355155	8185.1	8.1566	667.626	6	89	92377	85264.1	5.5713	4750.32
2013	TX	Texas	2013_TX	1.51181e+06	6.3	26479646	1	0	57093.2	45.02	3.483	3.73	51.99	1		2.30892	22.8627	4.40433	0.731001					6	151	9954303	1174.3	11.3537	133.327	6	155	1366825	8323.18	8.01727	667.292	6	93	95881	88623.6	5.80588	5145.38
2014	TX	Texas	2014_TX	1.55964e+06	5.1	26963092	1	0	57843.4	45.67	3.117	4.37	46.16	1		2.3222	20.4885	4.99242	0.685487					6	154	10138874	1158.08	11.8636	137.39	6	160	1432478	8111.36	8.16157	662.014	6	93	101641	89502.5	6.16259	5515.68
2015	TX	Texas	2015_TX	1.63413e+06	4.4	27468531	1	0	59490.9	42.6	1.822	2.62	44.13	1	2.23	2.25949	12.0877	3.38436	0.669639					5	156	10318006	1176.36	11.5607	135.996	5	166	1425780	7967.78	8.15359	649.66	5	95	105936	86673.6	5.59166	4846.5
2016	TX	Texas	2016_TX	1.63386e+06	4.6	27914064	1	0	58531.9	40.39	1.702	2.52	42.43	1	2.04	1.8	11.3093	3.29247	0.656367	1309306				4	159	10521732	1156.12	10.994	127.105	4	163	1447247	8009.71	8.25551	661.242	4	95	105552	89531.5	5.32756	4769.85
2017	TX	Texas	2017_TX	1667313	4.3	28291024	1	0	58934.3	39.08	2.23	2.99	38.8	1		2.18759	14.7344	3.72435	0.628028					4	158	10809494	1112	11.0137	122.472	4	165	1514712	7563.92	8.25704	624.555	4	96	114857	87043.1	5.35488	4661.05
2018	TX	Texas	2018_TX	1.74654e+06	3.9	28624564	1	0	61015.5	39.08	2.6	3.15	38.81	1	2.35	2.18759	17.1346	3.87138	0.628106					4	162	11148784	1176	11.2	131.63	4	168	1591150	7516.82	8.16212	613.532	4	95	125722	81893	5.39	4415.1
2019	TX	Texas	2019_TX	1.80291e+06		28986794	1	0	62197.7	38.52	2.449	2.56	35.59	1	2.01	1.99	14.41	2.34	0.65	982825	540	1828831	431234	4	203	11366639	1140	11.76	134.07	4	205	1537111	7699	8.06	620.21	4	115	232427	47209.8	5.4463	2571.19
2020	TX	Texas	2020_TX	1.77219e+06			1	0		36.13	1.891	2.03	33.27	1	1.88	2.04	10.73	2.1	0.62	866717	523	1773447	432869	1	1	11515333	1131.93	11.7137	132.591	4	143	1539553	7857.67	7.59875	597.085	4	86	264126	39472.1	5.06886	2000.78
2006	UT	Utah	2006_UT	127539	3	2525507	0	0	50500.5	41.9669	2.137	6.73	18.61	0		2.24655	15.25	6.19	0.470406		731			1	50	886169	774.123	7.59492	58.7941	1	49	108003	7522.01	6.14592	462.297	1	28	9164	75982.7	4.21195	3200.36
2007	UT	Utah	2007_UT	133800	2.6	2597746	0	1	51506.1	41.9669	2.286	6.97	32.78	0		2.24655	17.53	5.6	0.58103		425			1	50	909388	802	8.15414	65.39	1	51	111576	7648	6.53598	499.9	1	30	9461	77153	4.52471	3490.95
2008	UT	Utah	2008_UT	133663	3.6	2663029	0	1	50192.1	40.69	2.983	8.86	45.88	0		2.22047	22.17	6.38	0.683301		450			1	50	924826	792	8.25501	65.36	1	51	115149	7444	6.66439	496.1	1	31	9427	80320	4.58986	3686.58
2009	UT	Utah	2009_UT	130959	7.3	2723421	0	1	48086.1	43.33	2.141	3.94	45.86	0		2.2744	14.13	3.56	0.683145		365			1	50	932016	780	8.48	66.16	1	50	117905	7234	6.96	503.23	1	31	9480	75543	4.81	3635.9
2010	UT	Utah	2010_UT	138301	7.8	2775413	0	1	49830.8	44.27	2.705	4.37	49.29	0		2.2936	17.81	4.34	0.709922		467			1	50	936602	786	8.71	68.43	1	50	122340	7062	7.15	504.76	1	31	9431	77830	4.93	3839.18
2011	UT	Utah	2011_UT	138301	6.7	2814797	0	1	49133.6	45.02	3.467	4	55.64	0		2.30892	22.7589	4.65243	0.759496					1	50	946468	788	8.96	70.61	1	50	122363	7181	7.35	528.11	1	32	9378	82933	5.1	4228.6
2012	UT	Utah	2012_UT	140622	5.4	2854146	0	1	49269.6	45.77	3.58	2.75	54.99	0	2.09	1.92	23.55	2.94	0.754422					1	27	966063	792.582	9.92936	78.6983	1	27	115880	7768.67	8.05548	625.804	1	22	9417	85786.3	5.62043	4821.55
2013	UT	Utah	2013_UT	145027	4.6	2898773	0	1	50030.4	45.02	3.483	3.73	51.99	0	2.3	2.30892	22.44	3.97	0.731001		262	51128		1	27	981194	798.496	10.3685	82.7922	1	27	116263	7889.99	8.31782	656.275	1	23	9629	86634.2	5.87014	5085.55
2014	UT	Utah	2014_UT	150076	3.8	2938327	0	1	51075.4	45.67	3.117	4.37	46.16	0		2.3222	20.61	4.99242	0.685487	330146				1	26	1000416	746.687	10.6452	79.4862	1	27	117921	7811.2	8.53264	666.501	1	23	9658	85983.3	6.08137	5228.96
2015	UT	Utah	2015_UT	155432	3.6	2983626	0	1	52094.8	42.6	1.822	2.62	44.13	0	2.1	2.25949	12.0877	2.92	0.669639					1	26	1021839	743.525	10.8835	80.9214	1	27	121310	7978.59	8.62313	688.004	1	22	9570	81896.4	6.16773	5051.15
2016	UT	Utah	2016_UT	162528	3.4	3044241	0	1	53388.7	40.39	1.702	2.52	42.43	0		1.94	11.3093	3.29247	0.656367					1	28	1041823	749.54	11.0168	82.575	1	27	124540	7738.69	8.75457	677.488	1	23	9570	79998.2	6.3269	5061.41
2017	UT	Utah	2017_UT	172075	3.3	3103540	0	1	55444.8	39.08	2.23	2.99	38.8	0	2.17	2.18759	14.9	3.33	0.628028			42298		1	26	1063292	745.388	10.9541	81.6505	1	27	127113	7695.99	8.645	665.318	1	24	9594	80632.3	6.1304	4943.09
2018	UT	Utah	2018_UT	182106	3.1	3155153	0	1	57717	39.08	2.6	3.15	38.81	0		2.02	19.21	3.87138	0.628106			63190		1	28	1091162	742	10.41	77.25	1	27	130053	7742.89	8.22879	637.146	1	24	9666	80977	5.9	4775.94
2019	UT	Utah	2019_UT	192699		3203383	0	1	60154.7	38.52	2.449	2.56	35.59	0		2.17615	16.1551	3.32923	0.602968					1	49	1116145	727	10.4	75.63	1	50	132082	7483	8.26	617.98	1	39	10343	76467.5	5.97779	4571.07
2020	UT	Utah	2020_UT	194754			0	1		36.13	1.891	2.03	33.27	0		2.12733	12.5353	2.84222	0.584856					1	1	1143136	768.849	10.4362	80.2385	1	19	135113	7028.09	8.27129	581.313	1	17	11001	73267	5.90347	4325.29
2006	VA	Virginia	2006_VA	451263	3.1	7673725	0	0	58806.3	41.9669	2.137	6.73	18.61	1		2.24655	12.87	7.16101	0.470406					5	34	3095982	1154.88	8.48787	98.0251	5	34	392080	9490.8	6.21437	589.794	5	30	5178	305750	4.69084	14342.2
2007	VA	Virginia	2007_VA	457569	3	7751000	0	0	59033.5	41.9669	2.286	6.97	32.78	1		2.24655	13.58	7.38155	0.58103		6448			5	34	3139055	1207	8.74198	105.55	5	34	400520	9773	6.37819	623.34	5	29	5175	304748	5.06508	15435.8
2008	VA	Virginia	2008_VA	462035	3.9	7833496	0	0	58981.9	40.69	2.983	8.86	45.88	1		2.22047	21.37	9.11825	0.683301		4366			4	33	3169282	1173	9.61538	112.75	4	33	404316	9662	7.32401	707.65	4	27	5284	290779	5.81597	16911.6
2009	VA	Virginia	2009_VA	460075	6.7	7925937	0	0	58046.8	43.33	2.141	3.94	45.86	1		2.2744	13.45	4.5973	0.683145		5766			4	33	3189118	1170	10.61	124.06	4	33	407458	9577	8.06	771.55	4	27	5284	263026	6.91	18179.1
2010	VA	Virginia	2010_VA	479571	7.1	8024004	0	1	59767.1	44.27	2.705	4.37	49.29	1		2.2936	17.8158	4.99242	0.709922		5399			4	33	3258959	1239	10.45	129.43	4	33	419950	9532	7.65	729.5	4	27	5380	265508	6.66	17678.5
2011	VA	Virginia	2011_VA	479571	6.6	8102437	0	1	59188.5	45.02	3.467	4	55.64	1		2.30892	22.7589	4.65243	0.759496					3	32	3225395	1183	10.64	125.86	3	32	414137	9468	7.95	753.15	3	26	4082	351503	6.49	22824.3
2012	VA	Virginia	2012_VA	483041	6.1	8187456	0	1	58997.7	45.77	3.58	2.75	54.99	1	2.17	2.32424	23.492	3.50382	0.754422					3	29	3248518	1116.78	11.0783	123.72	3	28	419052	9298.1	8.07988	751.275	3	24	3973	363196	6.71512	24389
2013	VA	Virginia	2013_VA	488741	5.7	8255861	0	1	59199.3	45.02	3.483	3.73	51.99	1		3.32	20.97	4.15	0.71		1982		306430	3	29	3273502	1156.16	10.8431	125.363	3	28	422713	9413.52	8.00025	753.105	3	23	3585	398661	6.62515	26411.9
2014	VA	Virginia	2014_VA	488919	5.2	8315430	0	1	58796.6	45.67	3.117	4.37	46.16	1		2.3222	22.19	4.99242	0.685487			165522		3	28	3303676	1171.52	11.1001	130.039	3	28	422931	9408.87	8.152	767.011	3	23	3653	403800	6.89034	27823.2
2015	VA	Virginia	2015_VA	498944	4.5	8367303	0	1	59630.2	42.6	1.822	2.62	44.13	1		2.95	12.0877	3.38436	0.669639		5779			3	28	3332083	1148.64	11.3683	130.58	3	28	428369	9405.26	8.21052	772.221	3	23	3714	393492	6.94944	27345.5
2016	VA	Virginia	2016_VA	505108	4.1	8417651	0	1	60005.8	40.39	1.702	2.52	42.43	1		2.88	11.3093	3.07	0.65	176403		310799	310966	3	30	3362985	1119.69	11.3553	127.145	3	28	430877	9527.82	7.93439	755.975	3	23	3708	396620	6.55529	25999.6
2017	VA	Virginia	2017_VA	515167	3.7	8471011	0	1	60815.3	39.08	2.23	2.99	38.8	1		2.18759	11.93	3.33	0.66			327383	319562	3	28	3398529	1078.47	11.5475	124.536	3	28	422256	9907.21	8.01392	793.956	3	23	3692	387523	6.51012	25228.2
2018	VA	Virginia	2018_VA	527768	3	8510920	0	1	62010.6	39.08	2.6	3.15	38.81	1		2.67	17.1346	3.87138	0.63	105609	6729			3	30	3431574	1165	11.73	136.59	3	28	431058	10104.6	8.31641	840.343	3	23	3709	398967	6.86	27368.1
2019	VA	Virginia	2019_VA	541070		8556642	0	1	63233.9	38.52	2.449	2.56	35.59	1		2.17615	14.22	3.15	0.602968					3	32	3464677	1122	12.07	135.46	3	32	434175	10361	8.18	847.81	3	25	3723	393908	6.85319	26995.3
2020	VA	Virginia	2020_VA	533828			0	1		36.13	1.891	2.03	33.27	1		2.12733	12.5353	2.84222	0.57					1	1	3506844	1095.21	12.0267	131.717	3	20	437477	10196.1	7.63297	778.267	3	19	3693	394310	6.27637	24748.4
2006	VT	Vermont	2006_VT	29420.9	3.7	622892	1	0	47232.7	41.9669	2.137	6.73	18.61	1		2.24655	14.1311	7.16101	0.470406					4	21	306684	582.097	13.3914	77.951	4	21	48436	3487.58	11.6732	407.113	3	18	401	337842	8.32978	28141.5
2007	VT	Vermont	2007_VT	29296.6	4	623481	1	0	46988.8	41.9669	2.286	6.97	32.78	1		2.24655	15.0977	7.38155	0.58103					3	20	305328	592	14.1464	83.77	3	20	48940	3506	12.2897	430.87	3	18	403	338172	8.92075	30167.5
2008	VT	Vermont	2008_VT	30168.6	4.7	624151	1	0	48335.4	40.69	2.983	8.86	45.88	1		2.22047	19.6192	9.11825	0.683301					3	20	306174	581	14.4759	84.06	3	20	49643	3429	12.4913	428.37	3	17	315	413966	9.19284	38055.2
2009	VT	Vermont	2009_VT	29565.7	6.6	624817	1	0	47319	43.33	2.141	3.94	45.86	1	2.16	2.2744	12.53	4.5973	0.57					3	20	306919	576	14.9	85.83	3	20	50081	3313	12.93	428.53	3	16	225	512404	9.21	47194.1
2010	VT	Vermont	2010_VT	31663.6	6.1	625886	1	0	50590	44.27	2.705	4.37	49.29	1	2.47	2.2936	16.46	4.99242	0.65					3	20	307839	576	15.57	89.71	3	20	50620	3327	13.44	447.01	3	16	219	550213	9.53	52454.8
2011	VT	Vermont	2011_VT	31663.6	5.5	627197	1	0	50484.3	45.02	3.467	4	55.64	1		2.30892	22.15	4.65243	0.759496					3	20	308992	573	16.26	93.19	3	20	50796	3295	14	461.16	3	16	221	534353	9.83	52503.4
2012	VT	Vermont	2012_VT	31898.1	5	626361	1	0	50926.1	45.77	3.58	2.75	54.99	1	4.4	2.32424	23.492	4.06	0.754422					2	13	309019	565.036	17.0061	96.0905	2	12	51216	3244.25	14.3162	464.452	2	11	221	536044	9.97968	53495.5
2013	VT	Vermont	2013_VT	31494.6	4.4	626603	1	0	50262.4	45.02	3.483	3.73	51.99	1	5.32	2.30892	22.8627	5.53	0.84			44		1	12	311567	568.669	17.1374	97.4548	1	11	51788	3245.37	14.6613	475.814	1	10	223	540275	10.8421	58577.4
2014	VT	Vermont	2014_VT	31847.7	3.9	625693	1	0	50899.9	45.67	3.117	4.37	46.16	1		2.3222	20.4885	4.99242	0.8		45			1	11	310932	568.545	17.4735	99.3445	1	11	52453	3225.94	14.5627	469.782	1	10	224	527528	10.2335	53984.7
2015	VT	Vermont	2015_VT	32042.9	3.6	625810	1	0	51202.3	42.6	1.822	2.62	44.13	1	9.35	2.25949	16.73	3.38436	0.669639			20		1	11	312060	557.836	17.0893	95.3305	1	11	53610	3125.3	14.5404	454.431	1	10	231	512843	10.2716	52677.4
2016	VT	Vermont	2016_VT	32312.7	3.2	624366	1	0	51752.8	40.39	1.702	2.52	42.43	1		2.21434	11.3093	3.29247	0.656367					1	15	312239	548.832	17.3667	95.3138	1	11	55601	3018.6	14.5412	438.942	1	10	230	523914	10.2265	53577.9
2017	VT	Vermont	2017_VT	32589.2	3	625132	1	0	52131.7	39.08	2.23	2.99	38.8	1	8.19	2.18759	14.05	3.47	0.628028		87	13		1	10	313670	537.567	17.675	95.0152	1	10	56389	3616.44	12.5375	453.411	1	9	187	634422	10.2149	64805.7
2018	VT	Vermont	2018_VT	32827.8	2.7	624802	1	0	52541.1	39.08	2.6	3.15	38.81	1		2.18759	17.1346	3.87138	0.628106					1	15	315138	560	18.02	100.83	1	10	57037	2927.22	15.2401	446.11	1	9	204	576547	10.66	61431.9
2019	VT	Vermont	2019_VT	33207.6		624046	1	0	53213.4	38.52	2.449	2.56	35.59	1		2.17615	16.1551	3.32923	0.602968					1	17	316180	549	17.71	97.18	1	17	58320	2764	15.98	441.78	1	14	242	486107	11.0459	53694.7
2020	VT	Vermont	2020_VT	32307.1			1	0		36.13	1.891	2.03	33.27	1		2.12733	12.5353	2.84222	0.584856					1	1	316948	567.128	19.5352	110.79	1	4	59554	2526.75	16.3874	414.069	1	4	252	452619	11.2001	50693.7
2006	WA	Washington	2006_WA	372145	5	6370753	0	0	58414.6	41.9669	2.137	6.73	18.61	0	2.75	1.68	14.1311	5.66	0.470406		229	60310		3	60	2704101	1061.31	6.82342	72.4174	3	59	337999	7046.43	6.63414	467.47	3	43	25829	71022.9	4.43525	3150.04
2007	WA	Washington	2007_WA	394222	4.7	6461587	0	1	61010.1	41.9669	2.286	6.97	32.78	0	3.14	1.85	15.0977	6.01	0.58103		158	58641		3	60	2748270	1073	7.26125	77.92	3	59	345048	7149	6.55264	468.42	3	43	26114	66224	4.5698	3026.32
2008	WA	Washington	2008_WA	401093	5.4	6562231	0	1	61121.5	40.69	2.983	8.86	45.88	0	3.87	2.19	19.6192	8.31	0.683301		262	76792		3	60	2789188	1086	7.54336	81.89	3	60	349689	7120	6.75891	481.25	3	43	26034	67595	4.54714	3073.64
2009	WA	Washington	2009_WA	390814	9.2	6667426	0	1	58615.4	43.33	2.141	3.94	45.86	0	3.29	2.24	14.1571	5.14	0.683145		411	94008		3	59	2808333	1091	7.68	83.72	3	59	350805	7140	6.96	497.24	3	42	28635	67966	4.43	3011.2
2010	WA	Washington	2010_WA	411576	10	6743009	0	1	61037.4	44.27	2.705	4.37	49.29	0	2.93	2.22	19.87	5.36	0.65		211	81926		3	59	2825281	1030	8.04	82.75	3	59	353330	6800	7.37	501.22	3	41	27970	79349	4.07	3233.1
2011	WA	Washington	2011_WA	411576	9.3	6827479	0	1	60282.2	45.02	3.467	4	55.64	0	3.21	2.21	22.7589	4.65243	0.7	55119		40365	50293	3	59	2837631	1068	8.28	88.41	3	58	354185	6919	7.49	518.4	3	41	27845	83596	4.09	3417.73
2012	WA	Washington	2012_WA	426447	8.1	6898599	0	1	61816.5	45.77	3.58	2.75	54.99	0		2.32424	23.492	3.50382	0.754422					3	48	2852760	1037.33	8.52774	88.4606	3	47	356028	6843.94	7.67554	525.309	3	37	27690	82999	4.12954	3427.47
2013	WA	Washington	2013_WA	439472	7	6966252	0	1	63085.9	45.02	3.483	3.73	51.99	0	2.68	1.96	23.6	4.5	0.84	72944		89573		3	49	2880008	1041.19	8.69666	90.5484	3	48	360855	6849.17	7.7792	532.81	3	38	27808	81615.1	4.23124	3453.33
2014	WA	Washington	2014_WA	456186	6.1	7057531	0	1	64638.3	45.67	3.117	4.37	46.16	0	2.89	2.3222	20.4885	4.92	0.8	73840		88155		3	48	2907705	1005.46	8.66685	87.1416	3	48	359219	6736.91	7.96673	536.712	3	39	30308	77022.5	4.32408	3330.51
2015	WA	Washington	2015_WA	476715	5.6	7167287	0	1	66512.7	42.6	1.822	2.62	44.13	0		2.25949	12.0877	3.38436	0.669639					3	48	2945760	963.871	9.09284	87.6432	3	48	365095	6680.11	8.21973	549.088	3	39	29163	76501.9	4.35118	3328.74
2016	WA	Washington	2016_WA	495725	5.3	7299961	0	1	67907.9	40.39	1.702	2.52	42.43	0		2.21434	12.29	3.29247	0.656367		136			3	50	2985799	954.846	9.48412	90.5587	3	49	367847	6567.28	8.42881	553.544	3	40	29012	73758	4.43381	3270.29
2017	WA	Washington	2017_WA	527169	4.7	7427951	0	1	70971	39.08	2.23	2.99	38.8	0	2.3	2.18759	14.7344	3.37	0.628028			87075	85013	3	48	3037674	1022.79	9.65755	98.7767	3	48	381028	6517.35	8.56823	558.421	3	39	27825	74449.2	4.60196	3426.12
2018	WA	Washington	2018_WA	561786	4.5	7526793	0	1	74638.1	39.08	2.6	3.15	38.81	0		2.18759	17.1346	2.94	0.628106		149			3	50	3076868	957	9.75	93.34	3	48	384366	6373.35	8.71618	555.513	3	39	27284	77161	4.71	3638.13
2019	WA	Washington	2019_WA	588930		7614024	0	1	77348.1	38.52	2.449	2.56	35.59	0		2.17615	16.1551	3.32	0.602968					3	57	3126192	973	9.71	94.49	3	58	389147	6268	8.75	548.5	3	43	26829	78186.1	4.80438	3756.36
2020	WA	Washington	2020_WA	590401			0	1		36.13	1.891	2.03	33.27	0		2.12733	12.5353	2.86	0.584856					1	1	3168238	969.487	9.87364	95.7236	3	38	389802	5837.88	8.92231	520.874	3	34	26741	69936.9	5.08079	3553.35
2006	WI	Wisconsin	2006_WI	287147	4.7	5577655	1	0	51481.6	41.9669	2.137	6.73	18.61	0	1.72	1.47	14.1311	7.16101	0.53	422098		44484		12	118	2550249	711.678	10.5088	74.7891	12	118	323822	5856.01	8.3714	490.23	12	90	6921	304455	5.85437	17823.9
2007	WI	Wisconsin	2007_WI	289855	4.9	5610775	1	0	51660.5	41.9669	2.286	6.97	32.78	0	1.96	1.67	15.0977	7.38155	0.51	423592		55074		12	118	2572557	725	10.8653	78.75	12	118	329915	5934	8.71494	517.11	12	89	7040	301091	6.16114	18550.7
2008	WI	Wisconsin	2008_WI	286205	4.9	5640996	1	0	50736.6	40.69	2.983	8.86	45.88	0	2.15	1.94	19.6192	9.11825	0.5	437546		41713		12	118	2579776	710	11.5109	81.71	12	118	333653	5863	9.27504	543.77	12	90	4683	439040	6.51032	28582.9
2009	WI	Wisconsin	2009_WI	277279	8.6	5669264	1	0	48909.2	43.33	2.141	3.94	45.86	0	1.87	1.99	14.1571	4.5973	0.55	388816		41624	132653	12	118	2589296	689	11.94	82.28	12	118	336725	5562	9.57	532.08	12	90	4507	413977	6.73	27880
2010	WI	Wisconsin	2010_WI	293664	8.7	5690538	1	0	51605.7	44.27	2.705	4.37	49.29	0	2.02	2.11	17.8158	4.99242	0.64	420346		43076	138812	12	118	2594698	716	12.65	90.59	12	118	338406	5664	9.98	565.49	12	88	4496	434679	6.85	29771.5
2011	WI	Wisconsin	2011_WI	293664	7.8	5705840	1	0	51467.3	45.02	3.467	4	55.64	0		2.30892	22.7589	4.65243	0.759496			48280		12	118	2601879	709	13.02	92.39	12	118	340623	5640	10.42	587.89	12	86	4527	430872	7.33	31570.2
2012	WI	Wisconsin	2012_WI	299008	7	5720825	1	0	52266.5	45.77	3.58	2.75	54.99	0		2.32424	23.492	3.50382	0.754422	341229	575	88409	149845	12	86	2609168	703.492	13.1906	92.7947	12	85	341896	5662.74	10.5105	595.184	12	64	4572	429442	7.34492	31542.2
2013	WI	Wisconsin	2013_WI	301550	6.7	5738012	1	0	52553.1	45.02	3.483	3.73	51.99	0	2.25	2.30892	22.8627	4.39	0.77			62314	121994	12	86	2619676	702.883	13.5459	95.2121	12	85	341657	5770.5	10.745	620.038	12	64	4725	412165	7.4012	30505.1
2014	WI	Wisconsin	2014_WI	309426	5.4	5753199	1	0	53783.3	45.67	3.117	4.37	46.16	0		2.3222	21.47	4.99242	0.72	384088	712		98807	12	85	2631430	694.354	13.665	94.8835	12	85	345907	5723.48	10.7691	616.369	12	63	5465	363092	7.51982	27303.8
2015	WI	Wisconsin	2015_WI	315688	4.6	5762927	1	0	54779.1	42.6	1.822	2.62	44.13	0		2.27	12.0877	3.17	0.72		385		104666	12	85	2647224	667.831	14.1146	94.2617	12	85	347456	5639.59	10.8948	614.42	12	63	5529	361275	7.57652	27372.1
2016	WI	Wisconsin	2016_WI	319272	4	5775170	1	0	55283.6	40.39	1.702	2.52	42.43	0		2.21434	11.3093	2.77	0.71				106173	12	86	2662284	682.817	14.0707	96.077	12	85	349324	5697.69	10.7705	613.668	12	64	5537	361776	7.49498	27115
2017	WI	Wisconsin	2017_WI	321887	3.3	5793147	1	0	55563.4	39.08	2.23	2.99	38.8	0	2.17	2.22	12.68	3.2	0.71		419			12	85	2681341	659.905	14.3454	94.6657	12	85	351707	5601.52	10.8744	609.132	12	62	5666	355992	7.49246	26672.6
2018	WI	Wisconsin	2018_WI	328832	3	5809319	1	0	56604.3	39.08	2.6	3.15	38.81	0	2.22	2.18759	17.1346	3.22	0.68		473		105900	12	86	2700651	693	14.02	97.09	12	85	354639	5662.08	10.6729	604.306	12	63	5789	351595	7.33	25776.9
2019	WI	Wisconsin	2019_WI	333699		5824581	1	0	57291.4	38.52	2.449	2.56	35.59	0	2.08	2.22	16.1551	3.32923	0.65	262276		151255	104736	12	117	2720287	674	14.18	95.52	12	117	356561	5503	10.72	590.14	12	84	5522	356375	7.31342	26063.2
2020	WI	Wisconsin	2020_WI	322973			1	0		36.13	1.891	2.03	33.27	0		2.12733	9.12	2.84222	0.62				102071	1	1	2742424	694.238	14.3205	99.4181	12	66	360316	5189.03	10.7546	558.059	12	49	5621	328595	7.28942	23952.7
2006	WV	West Virginia	2006_WV	68900	4.9	1827912	0	0	37693.3	41.9669	2.137	6.73	18.61	1		1.66	12.06	7.16101	0.470406		1373	3834		11	16	853995	1074.79	6.35193	68.2701	11	16	132024	4656.65	5.59318	260.455	4	5	11768	98543.3	3.70933	3655.29
2007	WV	West Virginia	2007_WV	69374.1	4.6	1834052	0	0	37825.6	41.9669	2.286	6.97	32.78	1		1.81	15.64	7.38155	0.58103		1873	4005		11	16	860068	1138	6.73147	76.63	11	16	134682	4807	5.84648	281.04	4	6	11858	103032	3.95432	4074.23
2008	WV	West Virginia	2008_WV	70966.8	4.3	1840310	0	0	38562.4	40.69	2.983	8.86	45.88	1		2.35	21.93	9.11825	0.683301		1368	1970		7	12	863650	1135	7.0621	80.15	7	12	135756	4736	6.07817	287.88	4	6	12015	102221	4.20443	4297.82
2009	WV	West Virginia	2009_WV	70886.5	7.7	1847775	0	0	38363.2	43.33	2.141	3.94	45.86	1	2.67	2.64	14.24	4.5973	0.683145		1756	1164		7	12	865647	1116	7.9	88.16	7	12	136653	4692	6.77	317.55	4	6	12207	74992	5.24	3931.7
2010	WV	West Virginia	2010_WV	73175.2	8.7	1854265	0	1	39463.2	44.27	2.705	4.37	49.29	1	2.52	2.48	17.09	4.99242	0.709922		1567	1550		5	10	867948	1195	8.79	105.05	5	10	137209	4836	7.66	370.5	4	6	12348	78440	5.86	4595.98
2011	WV	West Virginia	2011_WV	73175.2	8.1	1856606	0	1	39413.4	45.02	3.467	4	55.64	1		2.30892	22.7589	4.65243	0.759496					5	9	868036	1128	9.39	105.89	5	9	137965	4692	8.14	382.04	4	6	12446	78475	6.18	4849.24
2012	WV	West Virginia	2012_WV	73124.5	7.5	1857446	0	1	39368.3	45.77	3.58	2.75	54.99	1		2.32424	23.492	3.50382	0.754422					5	7	865673	1077.65	9.85013	106.15	5	6	138687	4664.47	8.42124	392.807	4	4	12472	79214.6	6.32899	5013.48
2013	WV	West Virginia	2013_WV	73949	6.8	1854768	0	1	39869.7	45.02	3.483	3.73	51.99	1	2.53	2.30892	23.43	4.40433	0.731001					5	7	863641	1117.54	9.52443	106.439	5	6	139514	4655.16	8.16665	380.17	4	4	12314	81347.3	6.20052	5043.96
2014	WV	West Virginia	2014_WV	74111.3	6.6	1850569	0	1	40047.8	45.67	3.117	4.37	46.16	1	2.47	2.4	20.4885	4.99242	0.685487		1634			5	6	862869	1158.03	9.33803	108.137	5	6	140698	4665.09	7.9918	372.825	4	4	12146	88019	5.8702	5166.9
2015	WV	West Virginia	2015_WV	74261.4	6.7	1843332	0	1	40286.5	42.6	1.822	2.62	44.13	1		2.31	12.0877	3.38436	0.669639					5	6	861334	1106.56	10.0839	111.585	5	6	141681	4588.21	8.61059	395.072	4	4	11949	91115.3	6.09133	5550.14
2016	WV	West Virginia	2016_WV	73513.3	6.1	1832435	0	1	40117.8	40.39	1.702	2.52	42.43	1		2.21434	11.48	3.29247	0.656367					5	7	860375	1101.8	11.4447	126.098	5	6	142711	4569.65	9.35139	427.326	4	4	11704	91670.2	6.56914	6021.94
2017	WV	West Virginia	2017_WV	75172.4	5.2	1818683	0	1	41333.4	39.08	2.23	2.99	38.8	1	2.23	2.2	14.7344	3.72435	0.628028	684156				5	6	858961	1025.8	11.6301	119.301	5	6	143951	4370.37	9.57604	418.509	4	4	11529	98202.5	6.64404	6524.62
2018	WV	West Virginia	2018_WV	77406.5	5.3	1805953	0	1	42861.9	39.08	2.6	3.15	38.81	1		2.09	16.62	3.87138	0.628106	633418	1665	11531		5	7	859039	1133	11.18	126.7	5	6	144478	4484.21	9.24306	414.478	4	4	11515	102713	6.4	6570.8
2019	WV	West Virginia	2019_WV	76786.6		1795263	0	1	42771.8	38.52	2.449	2.56	35.59	1		2.17615	16.1551	2.19	0.602968					5	9	857666	1084	11.25	121.9	5	9	145225	4342	9.16	397.92	4	5	11562	104701	6.0246	6307.82
2020	WV	West Virginia	2020_WV	73952.9			0	1		36.13	1.891	2.03	33.27	1		2.12733	12.5353	2.84222	0.584856					1	1	862279	1051.24	11.804	124.087	5	5	146769	3949.43	9.40268	371.352	4	4	11444	103717	6.09372	6320.22
2006	WY	Wyoming	2006_WY	36655.6	3.2	522667	0	0	70131.8	41.9669	2.137	6.73	18.61	0		1.01	16.28	6.83	0.470406		509	819		5	34	243240	845.508	7.7464	65.4964	5	31	55566	6173.77	6.27797	387.587	4	21	8060	86456.3	4.0417	3494.3
2007	WY	Wyoming	2007_WY	39504.8	2.8	534876	0	1	73857.9	41.9669	2.286	6.97	32.78	0		1.06	17.72	6.82	0.58103		485	1977		5	34	247939	871	7.75157	67.53	5	31	57138	6145	6.24835	383.98	4	22	8217	88535	4.10446	3633.88
2008	WY	Wyoming	2008_WY	41641.2	3.1	546043	0	0	76259.9	40.69	2.983	8.86	45.88	0		1.15	22.63	7.44	0.683301			1061		5	35	252986	896	8.21441	73.56	5	31	59288	6200	6.70826	415.94	4	22	8888	89636	4.47304	4009.43
2009	WY	Wyoming	2009_WY	40599.6	6.3	559851	0	0	72518.6	43.33	2.141	3.94	45.86	0		2.2744	14.07	4.9	0.683145			1064		5	35	255383	887	8.58	76.12	5	31	59347	6021	7.28	438.43	4	22	8935	89109	4.83	4307.66
2010	WY	Wyoming	2010_WY	38929.8	6.4	564531	0	0	68959.5	44.27	2.705	4.37	49.29	0		1.29	17.36	5.67	0.709922			586		5	35	257447	883	8.77	77.43	5	31	59642	6032	7.42	447.3	4	20	8933	93932	4.98	4676.34
2011	WY	Wyoming	2011_WY	38929.8	5.8	567491	0	0	68599.9	45.02	3.467	4	55.64	0		2.30892	22.7589	4.65243	0.759496					5	35	258528	903	9.11	82.28	5	31	59872	6059	7.72	467.44	4	20	9067	94316	5.41	5101.91
2012	WY	Wyoming	2012_WY	38085	5.3	576656	0	0	66044.6	45.77	3.58	2.75	54.99	0		1.45	23.492	5.86	0.754422	458606		484		5	22	261191	866.712	9.84736	85.3482	5	23	59268	5969.28	8.23998	491.868	4	14	9163	91030.7	6.02745	5486.83
2013	WY	Wyoming	2013_WY	38408.7	4.7	582620	0	0	65924.1	45.02	3.483	3.73	51.99	0	1.55	2.30892	23.33	4.40433	0.731001					5	22	263614	894.457	10.1566	90.8462	5	23	58015	5841.65	8.57005	500.632	4	14	10134	83523.9	6.41992	5362.17
2014	WY	Wyoming	2014_WY	39287.2	4.1	583159	0	0	67369.6	45.67	3.117	4.37	46.16	0	1.61	1.58	22.43	6.96	0.685487	456946		834		5	21	265720	863.162	10.4959	90.5964	5	23	58178	5729.96	8.88176	508.921	4	15	10323	83805.3	6.61021	5539.71
2015	WY	Wyoming	2015_WY	40063.9	4.3	586389	0	0	68323.1	42.6	1.822	2.62	44.13	0	1.65	2.25949	12.0877	3.38436	0.669639			1283		5	21	268226	831.607	10.9656	91.1909	5	23	57686	5669.47	9.12196	517.167	4	15	10559	81474.5	6.75725	5505.43
2016	WY	Wyoming	2016_WY	37853.5	5.3	585243	0	0	64680	40.39	1.702	2.52	42.43	0		2.21434	11.49	3.29247	0.656367		430			5	22	269647	850.208	11.1337	94.6601	5	23	57434	5458.9	9.40007	513.14	4	15	10654	78542.3	6.92294	5437.44
2017	WY	Wyoming	2017_WY	37620.3	4.2	579994	0	0	64863.3	39.08	2.23	2.99	38.8	0		2.18759	14.48	3.72435	0.628028		428			5	21	270576	853.849	11.3724	97.1027	5	23	57863	5418.09	9.69695	525.39	4	15	10931	78093	6.91722	5401.86
2018	WY	Wyoming	2018_WY	37977.2	4.1	579054	0	0	65584.9	39.08	2.6	3.15	38.81	0		1.68	18.53	3.77	0.628106	424234	371	1967		5	22	272427	841	11.29	94.9	5	23	58318	5368.86	9.57551	514.095	4	15	10940	78909	6.71	5292.54
2019	WY	Wyoming	2019_WY	38558.2		580116	0	0	66466.4	38.52	2.449	2.56	35.59	0	1.66	2.17615	16.08	3.07	0.602968			3448		5	35	274881	864	11.18	96.53	5	33	58325	5109	9.64	492.52	4	23	11294	76284.2	6.72521	5130.27
2020	WY	Wyoming	2020_WY	36181.3			0	0		36.13	1.891	2.03	33.27	0		2.12733	12.5353	2.28	0.584856					1	1	276029	869.331	11.1108	96.5901	5	13	57958	4773.61	9.65367	460.828	4	9	11334	67139.2	6.87846	4618.14

## Sheet: All Raw Statewise Data
			Residential
		Census Division	Number of	Average Monthly	Average Retail Price	Average Monthly Bill
Year	Type	State	Consumers	Consumption (kWh)	(Cents per Kilowatthour)	(Dollar and cents)
2006	Residential	New England	6056160	639.71	15.9834	102.247	New England
2006	Residential	CT	1437836	751.33	16.8561	126.645	CT
2006	Residential	MA	2610734	626.402	16.5984	103.973	MA
2006	Residential	ME	685425	528.996	13.8014	73.0088	ME
2006	Residential	NH	587882	623.793	14.6824	91.5875	NH
2006	Residential	RI	427599	586.305	15.1153	88.6218	RI
2006	Residential	VT	306684	582.097	13.3914	77.951	VT
2006	Residential	Middle Atlantic	15392413	697.521	13.3627	93.208	Middle Atlantic
2006	Residential	NJ	3372447	707.24	12.8441	90.8388	NJ
2006	Residential	NY	6829269	590.922	16.8939	99.8296	NY
2006	Residential	PA	5190697	831.457	10.3475	86.0352	PA
2006	Residential	East North Central	19472313	797.905	9.13628	72.8989	East North Central
2006	Residential	IL	5020608	769.852	8.42407	64.8529	IL
2006	Residential	IN	2710178	992.754	8.22462	81.6502	IN
2006	Residential	MI	4299273	671.084	9.76814	65.5525	MI
2006	Residential	OH	4892005	875.156	9.34451	81.7791	OH
2006	Residential	WI	2550249	711.678	10.5088	74.7891	WI
2006	Residential	West North Central	8846054	940.476	8.11872	76.3546	West North Central
2006	Residential	IA	1313858	846.382	9.63164	81.5205	IA
2006	Residential	KS	1203783	934.739	8.2521	77.1356	KS
2006	Residential	MN	2240891	814.758	8.69542	70.8466	MN
2006	Residential	MO	2641569	1068.81	7.43655	79.4829	MO
2006	Residential	ND	309997	1035.77	7.136	73.9128	ND
2006	Residential	NE	782903	989.214	7.41186	73.3192	NE
2006	Residential	SD	353053	956.167	7.83304	74.8969	SD
2006	Residential	South Atlantic	24899810	1137.46	9.75531	110.963	South Atlantic
2006	Residential	DC	209316	725.422	9.87833	71.6596	DC
2006	Residential	DE	381642	929.894	11.8489	110.182	DE
2006	Residential	FL	8291743	1176.4	11.3313	133.302	FL
2006	Residential	GA	3924073	1157.82	8.90991	103.161	GA
2006	Residential	MD	2141929	1046.77	9.71399	101.684	MD
2006	Residential	NC	4011329	1097.96	9.11648	100.095	NC
2006	Residential	SC	1989801	1195.22	9.02709	107.894	SC
2006	Residential	VA	3095982	1154.88	8.48787	98.0251	VA
2006	Residential	WV	853995	1074.79	6.35193	68.2701	WV
2006	Residential	East South Central	7791650	1254.74	8.16217	102.414	East South Central
2006	Residential	AL	2065096	1302.49	8.75138	113.985	AL
2006	Residential	KY	1899764	1138.25	7.0207	79.9132	KY
2006	Residential	MS	1212812	1255.77	9.6569	121.268	MS
2006	Residential	TN	2613978	1301.21	7.75261	100.877	TN
2006	Residential	West South Central	13860466	1164.65	11.4813	133.717	West South Central
2006	Residential	AR	1283520	1107.96	8.85263	98.0837	AR
2006	Residential	LA	1857363	1261.32	9.13529	115.226	LA
2006	Residential	OK	1616987	1117.84	8.54879	95.5618	OK
2006	Residential	TX	9102596	1161.24	12.8564	149.293	TX
2006	Residential	Mountain	8518567	884.91	8.9795	79.4605	Mountain
2006	Residential	AZ	2442903	1104.13	9.39754	103.761	AZ
2006	Residential	CO	2030827	695.592	9.01998	62.7423	CO
2006	Residential	ID	628199	1068.86	6.2084	66.359	ID
2006	Residential	MT	449308	814.952	8.28282	67.501	MT
2006	Residential	NM	815799	613.859	9.05735	55.5994	NM
2006	Residential	NV	1022122	976.573	11.0788	108.192	NV
2006	Residential	UT	886169	774.123	7.59492	58.7941	UT
2006	Residential	WY	243240	845.508	7.7464	65.4964	WY
2006	Residential	Pacific Contiguous	16970544	703.434	11.6188	81.7307	Pacific Contiguous
2006	Residential	CA	12689438	589.964	14.3323	84.5555	CA
2006	Residential	OR	1577005	1002.83	7.47595	74.9709	OR
2006	Residential	WA	2704101	1061.31	6.82342	72.4174	WA
2006	Residential	Pacific Noncontiguous	663094	666.407	19.9403	132.883	Pacific Noncontiguous
2006	Residential	AK	261502	675.665	14.8274	100.183	AK
2006	Residential	HI	401592	660.378	23.3467	154.177	HI
2006	Residential	U.S. Total	122471071	919.619	10.4018	95.6568	U.S. Total
2006	Commercial	New England	817747	5520.34	14.5191	801.505	New England
2006	Commercial	CT	152984	7414.19	14.0268	1039.97	CT
2006	Commercial	MA	374294	5841.43	15.5418	907.861	MA
2006	Commercial	ME	86406	3986.9	12.4248	495.364	ME
2006	Commercial	NH	100730	3774.57	14.0669	530.964	NH
2006	Commercial	RI	54897	5463.77	13.5081	738.049	RI
2006	Commercial	VT	48436	3487.58	11.6732	407.113	VT
2006	Commercial	Middle Atlantic	2132191	6295.93	12.6989	799.514	Middle Atlantic
2006	Commercial	NJ	461461	7121.85	11.6201	827.564	NJ
2006	Commercial	NY	1004967	6304.4	15.5112	977.889	NY
2006	Commercial	PA	665763	5710.69	8.94487	510.813	PA
2006	Commercial	East North Central	2343796	6494.32	8.15006	529.291	East North Central
2006	Commercial	IL	568400	7423.02	7.94995	590.126	IL
2006	Commercial	IN	332336	5975.38	7.21342	431.029	IN
2006	Commercial	MI	514049	6370.83	8.51044	542.185	MI
2006	Commercial	OH	605189	6353.48	8.43728	536.061	OH
2006	Commercial	WI	323822	5856.01	8.3714	490.23	WI
2006	Commercial	West North Central	1310594	6079.19	6.61772	402.304	West North Central
2006	Commercial	IA	206821	4698.23	7.29225	342.607	IA
2006	Commercial	KS	217500	5665.27	6.96308	394.477	KS
2006	Commercial	MN	260186	7102.36	7.01877	498.498	MN
2006	Commercial	MO	359108	6915.39	6.07659	420.22	MO
2006	Commercial	ND	53709	6402.64	6.30011	403.373	ND
2006	Commercial	NE	149186	5030.36	6.19381	311.571	NE
2006	Commercial	SD	64084	5271.46	6.46706	340.908	SD
2006	Commercial	South Atlantic	3405931	7275.05	8.46087	615.532	South Atlantic
2006	Commercial	DC	26756	28124	11.1653	3140.14	DC
2006	Commercial	DE	47098	7424.25	10.2129	758.229	DE
2006	Commercial	FL	1090153	6979.14	9.90987	691.624	FL
2006	Commercial	GA	529687	7165.63	7.81309	559.857	GA
2006	Commercial	MD	236610	10470.5	10.5638	1106.08	MD
2006	Commercial	NC	621995	5973.35	7.16679	428.097	NC
2006	Commercial	SC	329528	5291.03	7.60463	402.363	SC
2006	Commercial	VA	392080	9490.8	6.21437	589.794	VA
2006	Commercial	WV	132024	4656.65	5.59318	260.455	WV
2006	Commercial	East South Central	1315749	5259.53	7.9038	415.703	East South Central
2006	Commercial	AL	359846	5122.55	8.17609	418.824	AL
2006	Commercial	KY	289117	5459.47	6.43514	351.324	KY
2006	Commercial	MS	218193	4945.35	9.3677	463.266	MS
2006	Commercial	TN	448593	5393.37	8.00161	431.556	TN
2006	Commercial	West South Central	2169558	6256.54	9.25564	579.09	West South Central
2006	Commercial	AR	171018	5642.94	6.95838	392.657	AR
2006	Commercial	LA	258698	7080.15	9.02531	639.061	LA
2006	Commercial	OK	249947	6066.84	7.34298	445.487	OK
2006	Commercial	TX	1489895	6215.78	9.85377	612.489	TX
2006	Commercial	Mountain	1251556	6040.63	7.58014	457.888	Mountain
2006	Commercial	AZ	280070	8517.49	8.01675	682.826	AZ
2006	Commercial	CO	345297	4863.6	7.50496	365.011	CO
2006	Commercial	ID	92585	5232.33	5.15613	269.785	ID
2006	Commercial	MT	96617	4041.72	7.44295	300.824	MT
2006	Commercial	NM	130201	5506.68	7.61366	419.259	NM
2006	Commercial	NV	143217	5222.48	10.121	528.566	NV
2006	Commercial	UT	108003	7522.01	6.14592	462.297	UT
2006	Commercial	WY	55566	6173.77	6.27797	387.587	WY
2006	Commercial	Pacific Contiguous	2318353	5963.93	11.2227	669.313	Pacific Contiguous
2006	Commercial	CA	1751882	5767.85	12.8952	743.776	CA
2006	Commercial	OR	228472	5866.01	6.76698	396.952	OR
2006	Commercial	WA	337999	7046.43	6.63414	467.47	WA
2006	Commercial	Pacific Noncontiguous	107024	4912.41	17.1797	843.936	Pacific Noncontiguous
2006	Commercial	AK	45690	5141.92	11.9272	613.289	AK
2006	Commercial	HI	61334	4741.43	21.4229	1015.75	HI
2006	Commercial	U.S. Total	17172499	6307.29	9.45678	596.468	U.S. Total
2006	Industrial	New England	28132	68950.2	11.5845	7987.56	New England
2006	Industrial	CT	5361	76571.2	11.7078	8964.79	CT
2006	Industrial	MA	14072	56865	13.0397	7415.03	MA
2006	Industrial	ME	2825	112089	8.83121	9898.82	ME
2006	Industrial	NH	3183	55796.2	11.6171	6481.88	NH
2006	Industrial	RI	2290	43353.4	12.5108	5423.87	RI
2006	Industrial	VT	401	337842	8.32978	28141.5	VT
2006	Industrial	Middle Atlantic	51316	120540	7.76755	9362.98	Middle Atlantic
2006	Industrial	NJ	13929	67787.8	10.4151	7060.15	NJ
2006	Industrial	NY	9115	136921	9.3922	12859.9	NY
2006	Industrial	PA	28272	141248	6.6338	9370.12	PA
2006	Industrial	East North Central	67435	259131	5.35623	13879.7	East North Central
2006	Industrial	IL	6513	574702	4.68853	26945.1	IL
2006	Industrial	IN	19147	215568	4.94912	10668.7	IN
2006	Industrial	MI	13317	213342	6.04597	12898.6	MI
2006	Industrial	OH	21537	216176	5.60759	12122.2	OH
2006	Industrial	WI	6921	304455	5.85437	17823.9	WI
2006	Industrial	West North Central	85732	82590.8	4.94473	4083.9	West North Central
2006	Industrial	IA	5790	263837	4.92146	12984.6	IA
2006	Industrial	KS	17680	54026.6	5.20059	2809.7	KS
2006	Industrial	MN	8503	222120	5.28718	11743.9	MN
2006	Industrial	MO	10528	144976	4.57691	6635.42	MO
2006	Industrial	ND	2331	116747	4.99616	5832.87	ND
2006	Industrial	NE	38541	19410.7	4.55583	884.318	NE
2006	Industrial	SD	2359	68943.9	4.83849	3335.84	SD
2006	Industrial	South Atlantic	87302	150193	5.45018	8185.8	South Atlantic
2006	Industrial	DC	1	1.99868e+07	17.4306	3.48383e+06	DC
2006	Industrial	DE	610	423501	7.66516	32462	DE
2006	Industrial	FL	30889	53330.2	7.70682	4110.06	FL
2006	Industrial	GA	15164	190080	5.38026	10226.8	GA
2006	Industrial	MD	8363	60355.4	8.13887	4912.25	MD
2006	Industrial	NC	10867	224402	5.23082	11738.1	NC
2006	Industrial	SC	4462	586727	4.71347	27655.2	SC
2006	Industrial	VA	5178	305750	4.69084	14342.2	VA
2006	Industrial	WV	11768	98543.3	3.70933	3655.29	WV
2006	Industrial	East South Central	24918	434516	4.80936	20897.4	East South Central
2006	Industrial	AL	8878	340549	4.90081	16689.6	AL
2006	Industrial	KY	6248	584900	4.04996	23688.2	KY
2006	Industrial	MS	7749	168966	5.94457	10044.3	MS
2006	Industrial	TN	2043	1.39017e+06	5.1658	71813.3	TN
2006	Industrial	West South Central	208710	65908.9	7.16575	4722.86	West South Central
2006	Industrial	AR	31422	47710.8	5.24286	2501.41	AR
2006	Industrial	LA	20378	111938	6.87163	7691.98	LA
2006	Industrial	OK	17810	70270.7	5.45517	3833.38	OK
2006	Industrial	TX	139100	62718	7.81848	4903.6	TX
2006	Industrial	Mountain	77342	81515	5.50527	4487.63	Mountain
2006	Industrial	AZ	7397	138112	5.68955	7857.96	AZ
2006	Industrial	CO	13409	78335.6	5.88108	4606.97	CO
2006	Industrial	ID	25677	28855.4	3.60567	1040.43	ID
2006	Industrial	MT	4734	83351.2	5.11591	4264.17	MT
2006	Industrial	NM	5497	103418	5.56908	5759.4	NM
2006	Industrial	NV	3404	333543	8.02623	26771	NV
2006	Industrial	UT	9164	75982.7	4.21195	3200.36	UT
2006	Industrial	WY	8060	86456.3	4.0417	3494.3	WY
2006	Industrial	Pacific Contiguous	126645	56585.5	7.8512	4442.64	Pacific Contiguous
2006	Industrial	CA	79036	53763.4	10.0901	5424.76	CA
2006	Industrial	OR	21780	49705.3	4.8518	2411.6	OR
2006	Industrial	WA	25829	71022.9	4.43525	3150.04	WA
2006	Industrial	Pacific Noncontiguous	2072	206667	16.4051	33904	Pacific Noncontiguous
2006	Industrial	AK	1383	74887.1	11.5408	8642.56	AK
2006	Industrial	HI	689	471184	17.9569	84610.1	HI
2006	Industrial	U.S. Total	759604	110946	6.16116	6835.55	U.S. Total
2007	Residential	New England	6122590	649	16.7001	108.46	New England
2007	Residential	CT	1459141	764	19.1114	145.95	CT
2007	Residential	MA	2642144	635	16.2318	103.09	MA
2007	Residential	ME	694235	530	16.5232	87.53	ME
2007	Residential	NH	592238	632	14.8784	94.06	NH
2007	Residential	RI	429504	608	14.0476	85.36	RI
2007	Residential	VT	305328	592	14.1464	83.77	VT
2007	Residential	Middle Atlantic	15535148	722	13.9503	100.71	Middle Atlantic
2007	Residential	NJ	3394474	730	14.1397	103.28	NJ
2007	Residential	NY	6933304	604	17.0988	103.25	NY
2007	Residential	PA	5207370	874	10.9494	95.65	PA
2007	Residential	East North Central	19558522	830	9.73947	80.84	East North Central
2007	Residential	IL	5065123	790	10.1242	80.01	IL
2007	Residential	IN	2727752	1058	8.26147	87.44	IN
2007	Residential	MI	4298455	686	10.2126	70.02	MI
2007	Residential	OH	4894635	926	9.57035	88.6	OH
2007	Residential	WI	2572557	725	10.8653	78.75	WI
2007	Residential	West North Central	8969792	970	8.30681	80.62	West North Central
2007	Residential	IA	1323176	886	9.44609	83.65	IA
2007	Residential	KS	1250241	920	8.19304	75.4	KS
2007	Residential	MN	2267167	832	9.17836	76.4	MN
2007	Residential	MO	2666181	1121	7.68958	86.22	MO
2007	Residential	ND	314466	1078	7.30458	78.73	ND
2007	Residential	NE	790165	1028	7.5916	78.04	NE
2007	Residential	SD	358396	991	8.07332	79.98	SD
2007	Residential	South Atlantic	25336801	1156	10.0272	115.95	South Atlantic
2007	Residential	DC	212389	773	11.1825	86.42	DC
2007	Residential	DE	387923	960	13.1647	126.4	DE
2007	Residential	FL	8445561	1163	11.223	130.47	FL
2007	Residential	GA	4001957	1171	9.09521	106.48	GA
2007	Residential	MD	2163625	1086	11.8928	129.15	MD
2007	Residential	NC	4090510	1143	9.39655	107.38	NC
2007	Residential	SC	2035713	1210	9.18662	111.2	SC
2007	Residential	VA	3139055	1207	8.74198	105.55	VA
2007	Residential	WV	860068	1138	6.73147	76.63	WV
2007	Residential	East South Central	7895454	1290	8.35495	107.79	East South Central
2007	Residential	AL	2093093	1305	9.32419	121.7	AL
2007	Residential	KY	1917257	1217	7.3406	89.35	KY
2007	Residential	MS	1227001	1261	9.35855	118	MS
2007	Residential	TN	2658103	1344	7.84185	105.42	TN
2007	Residential	West South Central	13968942	1149	11.1539	128.14	West South Central
2007	Residential	AR	1298492	1118	8.73125	97.58	AR
2007	Residential	LA	1885657	1276	9.37333	119.62	LA
2007	Residential	OK	1617944	1100	8.58456	94.45	OK
2007	Residential	TX	9166849	1136	12.3426	140.17	TX
2007	Residential	Mountain	8722741	908	9.30792	84.54	Mountain
2007	Residential	AZ	2513923	1142	9.66293	110.31	AZ
2007	Residential	CO	2068901	710	9.25318	65.72	CO
2007	Residential	ID	644645	1078	6.35933	68.56	ID
2007	Residential	MT	459379	824	8.77325	72.28	MT
2007	Residential	NM	831081	640	9.11935	58.41	NM
2007	Residential	NV	1047485	986	11.8175	116.49	NV
2007	Residential	UT	909388	802	8.15414	65.39	UT
2007	Residential	WY	247939	871	7.75157	67.53	WY
2007	Residential	Pacific Contiguous	17167331	699	11.8226	82.6	Pacific Contiguous
2007	Residential	CA	12819149	580	14.4236	83.6	CA
2007	Residential	OR	1599912	1009	8.18528	82.6	OR
2007	Residential	WA	2748270	1073	7.26125	77.92	WA
2007	Residential	Pacific Noncontiguous	672595	659	20.5645	135.43	Pacific Noncontiguous
2007	Residential	AK	265449	664	15.1799	100.76	AK
2007	Residential	HI	407146	655	24.1217	158.02	HI
2007	Residential	U.S. Total	123949916	936	10.6515	99.7	U.S. Total
2007	Commercial	New England	831765	5692	14.7101	837.24	New England
2007	Commercial	CT	158922	7932	15.3884	1220.55	CT
2007	Commercial	MA	378830	5972	15.2016	907.83	MA
2007	Commercial	ME	87565	3993	12.9428	516.74	ME
2007	Commercial	NH	101848	3739	13.9143	520.27	NH
2007	Commercial	RI	55660	5555	12.6704	703.82	RI
2007	Commercial	VT	48940	3506	12.2897	430.87	VT
2007	Commercial	Middle Atlantic	2149475	6309	13.2205	834.09	Middle Atlantic
2007	Commercial	NJ	465987	7310	12.991	949.63	NJ
2007	Commercial	NY	1016069	6096	15.9153	970.18	NY
2007	Commercial	PA	667419	5935	9.20396	546.23	PA
2007	Commercial	East North Central	2372723	6620	8.4909	562.06	East North Central
2007	Commercial	IL	579121	7489	8.57274	642	IL
2007	Commercial	IN	336379	6136	7.29105	447.37	IN
2007	Commercial	MI	518058	6442	8.77447	565.24	MI
2007	Commercial	OH	609250	6583	8.67458	571.05	OH
2007	Commercial	WI	329915	5934	8.71494	517.11	WI
2007	Commercial	West North Central	1339783	6158	6.79429	418.37	West North Central
2007	Commercial	IA	209108	4816	7.10586	342.21	IA
2007	Commercial	KS	230660	5591	6.82596	381.61	KS
2007	Commercial	MN	266164	7052	7.47761	527.3	MN
2007	Commercial	MO	363192	7142	6.33809	452.65	MO
2007	Commercial	ND	54550	6439	6.58457	423.95	ND
2007	Commercial	NE	151342	5174	6.39083	330.66	NE
2007	Commercial	SD	64767	5380	6.61001	355.6	SD
2007	Commercial	South Atlantic	3484425	7384	8.6598	639.45	South Atlantic
2007	Commercial	DC	27493	28852	12.0118	3465.66	DC
2007	Commercial	DE	48590	7410	11.2075	830.5	DE
2007	Commercial	FL	1117907	7002	9.74554	682.38	FL
2007	Commercial	GA	538632	7271	8.06622	586.5	GA
2007	Commercial	MD	239024	10700	11.5774	1238.8	MD
2007	Commercial	NC	639991	6095	7.42892	452.77	NC
2007	Commercial	SC	337586	5368	7.74444	415.73	SC
2007	Commercial	VA	400520	9773	6.37819	623.34	VA
2007	Commercial	WV	134682	4807	5.84648	281.04	WV
2007	Commercial	East South Central	1338491	5372	8.07229	433.68	East South Central
2007	Commercial	AL	365740	5211	8.70312	453.56	AL
2007	Commercial	KY	293501	5688	6.75601	384.31	KY
2007	Commercial	MS	222387	5021	8.92239	448.02	MS
2007	Commercial	TN	456863	5469	8.09066	442.51	TN
2007	Commercial	West South Central	2106793	6482	9.26455	600.49	West South Central
2007	Commercial	AR	173714	5661	6.91494	391.47	AR
2007	Commercial	LA	261148	7303	9.12642	666.54	LA
2007	Commercial	OK	258573	6006	7.33324	440.4	OK
2007	Commercial	TX	1413358	6518	9.86957	643.26	TX
2007	Commercial	Mountain	1284080	6137	7.76528	476.55	Mountain
2007	Commercial	AZ	291457	8713	8.26692	720.34	AZ
2007	Commercial	CO	347171	4923	7.61802	375	CO
2007	Commercial	ID	96345	5202	5.14041	267.42	ID
2007	Commercial	MT	98720	4075	8.1044	330.28	MT
2007	Commercial	NM	132379	5623	7.66484	430.96	NM
2007	Commercial	NV	149294	5220	10.092	526.82	NV
2007	Commercial	UT	111576	7648	6.53598	499.9	UT
2007	Commercial	WY	57138	6145	6.24835	383.98	WY
2007	Commercial	Pacific Contiguous	2361636	5980	11.187	669	Pacific Contiguous
2007	Commercial	CA	1785796	5772	12.8178	739.84	CA
2007	Commercial	OR	230792	5845	7.19988	420.8	OR
2007	Commercial	WA	345048	7149	6.55264	468.42	WA
2007	Commercial	Pacific Noncontiguous	108048	4896	17.577	860.65	Pacific Noncontiguous
2007	Commercial	AK	46047	5119	12.1869	623.81	AK
2007	Commercial	HI	62001	4731	21.9077	1036.55	HI
2007	Commercial	U.S. Total	17377219	6408	9.64617	618.16	U.S. Total
2007	Industrial	New England	28641	67255	12.7412	8569.05	New England
2007	Industrial	CT	5986	75640	12.9205	9773.12	CT
2007	Industrial	MA	13950	56452	13.0255	7353.11	MA
2007	Industrial	ME	2820	96093	14.105	13554	ME
2007	Industrial	NH	3230	56068	12.2682	6878.53	NH
2007	Industrial	RI	2252	43334	12.0416	5218.07	RI
2007	Industrial	VT	403	338172	8.92075	30167.5	VT
2007	Industrial	Middle Atlantic	54270	122543	7.77996	9533.82	Middle Atlantic
2007	Industrial	NJ	13579	67588	10.0813	6813.75	NJ
2007	Industrial	NY	12834	131244	8.71233	11434.4	NY
2007	Industrial	PA	27857	145323	6.8703	9984.12	PA
2007	Industrial	East North Central	67186	265373	5.89775	15651	East North Central
2007	Industrial	IL	5889	642869	6.60649	42471.1	IL
2007	Industrial	IN	19684	211625	4.89063	10349.8	IN
2007	Industrial	MI	13227	213445	6.47041	13810.8	MI
2007	Industrial	OH	21346	231187	5.76341	13324.2	OH
2007	Industrial	SC	4657	548143	4.82904	26470	WI
2007	Industrial	West North Central	88384	81516	5.07959	4140.65	West North Central
2007	Industrial	IA	5941	268261	4.73768	12709.3	IA
2007	Industrial	KS	18303	49561	5.12836	2541.67	KS
2007	Industrial	MN	8726	220046	5.68896	12518.3	MN
2007	Industrial	MO	10634	145091	4.76308	6910.77	MO
2007	Industrial	ND	2725	110817	5.23578	5802.14	ND
2007	Industrial	NE	39099	19405	4.77605	926.77	NE
2007	Industrial	SD	2956	60935	5.09107	3102.25	SD
2007	Industrial	South Atlantic	84835	153089	5.67406	8686.35	South Atlantic
2007	Industrial	DC	13	1901840	9.32195	177288	DC
2007	Industrial	DE	616	416458	8.92506	37169.1	DE
2007	Industrial	FL	28476	56308	7.75636	4367.42	FL
2007	Industrial	GA	14706	192971	5.53182	10674.8	GA
2007	Industrial	MD	8586	58044	9.41454	5464.54	MD
2007	Industrial	NC	10748	224681	5.46502	12278.8	NC
2007	Industrial	TN	2067	1364713	5.19397	70882.8	SC
2007	Industrial	TX	168586	53534	7.79199	4171.34	VA
2007	Industrial	UT	9461	77153	4.52471	3490.95	WV
2007	Industrial	East South Central	25639	424404	5.03927	21386.9	East South Central
2007	Industrial	AL	9828	306713	5.27045	16165.1	AL
2007	Industrial	KY	6239	592585	4.47214	26501.2	KY
2007	Industrial	MS	7505	179737	5.75354	10341.2	MS
2007	Industrial	VA	5175	304748	5.06508	15435.8	TN
2007	Industrial	West South Central	238972	58981	7.14262	4212.75	West South Central
2007	Industrial	AR	31471	47237	5.24943	2479.66	AR
2007	Industrial	LA	21336	108576	6.77273	7353.53	LA
2007	Industrial	OK	17579	72047	5.414	3900.63	OK
2007	Industrial	WA	26114	66224	4.5698	3026.32	TX
2007	Industrial	Mountain	76797	86037	5.67707	4884.37	Mountain
2007	Industrial	AZ	7418	137967	6.04649	8342.17	AZ
2007	Industrial	CO	12369	88345	5.96897	5273.3	CO
2007	Industrial	ID	25722	30458	3.87299	1179.62	ID
2007	Industrial	MT	4490	114379	5.15695	5898.44	MT
2007	Industrial	NM	5621	103013	5.59647	5765.08	NM
2007	Industrial	NV	3499	330873	8.28159	27401.5	NV
2007	Industrial	WI	7040	301091	6.16114	18550.7	UT
2007	Industrial	WY	8217	88535	4.10446	3633.88	WY
2007	Industrial	Pacific Contiguous	127012	55381	7.888	4368.44	Pacific Contiguous
2007	Industrial	CA	78620	53568	9.98447	5348.49	CA
2007	Industrial	OR	22278	49067	5.06041	2483.01	OR
2007	Industrial	WV	11858	103032	3.95432	4074.23	WA
2007	Industrial	Pacific Noncontiguous	2031	215333	16.8628	36311.1	Pacific Noncontiguous
2007	Industrial	AK	1349	85481	12.6325	10798.4	AK
2007	Industrial	HI	682	472182	18.3775	86775.5	HI
2007	Industrial	U.S. Total	793767	107907	6.39326	6898.74	U.S. Total
2008	Residential	New England	6125483	630	17.7021	111.48	New England
2008	Residential	Connecticut	1452080	731	19.5459	142.79	Connecticut
2008	Residential	Maine	695368	521	16.1983	84.47	Maine
2008	Residential	Massachusetts	2647529	618	17.6815	109.3	Massachusetts
2008	Residential	New Hampshire	594180	616	15.6845	96.66	New Hampshire
2008	Residential	Rhode Island	430152	589	17.448	102.85	Rhode Island
2008	Residential	Vermont	306174	581	14.4759	84.06	Vermont
2008	Residential	Middle Atlantic	15538589	709	14.8778	105.49	Middle Atlantic
2008	Residential	New Jersey	3409806	711	15.6639	111.44	New Jersey
2008	Residential	New York	6897087	592	18.2981	108.41	New York
2008	Residential	Pennsylvania	5231696	861	11.3521	97.75	Pennsylvania
2008	Residential	East North Central	19593687	810	10.3858	84.12	East North Central
2008	Residential	Illinois	5098579	765	11.0679	84.62	Illinois
2008	Residential	Indiana	2733128	1036	8.87401	91.94	Indiana
2008	Residential	Michigan	4290313	666	10.7453	71.58	Michigan
2008	Residential	Ohio	4891891	910	10.0565	91.5	Ohio
2008	Residential	Wisconsin	2579776	710	11.5109	81.71	Wisconsin
2008	Residential	West North Central	8972432	962	8.67068	83.45	West North Central
2008	Residential	Iowa	1325990	884	9.49046	83.94	Iowa
2008	Residential	Kansas	1203021	928	8.88337	82.41	Kansas
2008	Residential	Minnesota	2279850	817	9.73526	79.55	Minnesota
2008	Residential	Missouri	2686746	1098	8.00106	87.83	Missouri
2008	Residential	Nebraska	794548	1023	7.8691	80.46	Nebraska
2008	Residential	North Dakota	318760	1113	7.51497	83.68	North Dakota
2008	Residential	South Dakota	363517	1010	8.27366	83.56	South Dakota
2008	Residential	South Atlantic	25546877	1125	10.6649	119.96	South Atlantic
2008	Residential	Delaware	391810	942	13.9335	131.23	Delaware
2008	Residential	District of Columbia	215355	734	12.7857	93.83	District of Columbia
2008	Residential	Florida	8478405	1120	11.6544	130.52	Florida
2008	Residential	Georgia	4034752	1148	9.92587	113.96	Georgia
2008	Residential	Maryland	2178595	1038	13.8392	143.69	Maryland
2008	Residential	North Carolina	4146430	1120	9.51654	106.61	North Carolina
2008	Residential	South Carolina	2068598	1198	9.88652	118.4	South Carolina
2008	Residential	Virginia	3169282	1173	9.61538	112.75	Virginia
2008	Residential	West Virginia	863650	1135	7.0621	80.15	West Virginia
2008	Residential	East South Central	7962774	1256	9.31574	116.98	East South Central
2008	Residential	Alabama	2110859	1271	10.4012	132.16	Alabama
2008	Residential	Kentucky	1928082	1191	7.94459	94.64	Kentucky
2008	Residential	Mississippi	1238408	1231	10.3943	127.95	Mississippi
2008	Residential	Tennessee	2685425	1302	8.91347	116.02	Tennessee
2008	Residential	West South Central	14279978	1143	11.8563	135.48	West South Central
2008	Residential	Arkansas	1308810	1107	9.27275	102.69	Arkansas
2008	Residential	Louisiana	1919826	1252	10.2843	128.77	Louisiana
2008	Residential	Oklahoma	1633265	1115	9.09034	101.39	Oklahoma
2008	Residential	Texas	9418077	1130	13.0367	147.32	Texas
2008	Residential	Mountain	8891840	882	9.83512	86.74	Mountain
2008	Residential	Arizona	2528405	1095	10.2668	112.47	Arizona
2008	Residential	Colorado	2173458	679	10.1264	68.8	Colorado
2008	Residential	Idaho	654545	1087	6.99154	76.01	Idaho
2008	Residential	Montana	461600	843	9.12777	76.95	Montana
2008	Residential	Nevada	1054691	953	11.9291	113.68	Nevada
2008	Residential	New Mexico	841329	632	10.0097	63.24	New Mexico
2008	Residential	Utah	924826	792	8.25501	65.36	Utah
2008	Residential	Wyoming	252986	896	8.21441	73.56	Wyoming
2008	Residential	Pacific Contiguous	17347503	708	11.5452	81.79	Pacific Contiguous
2008	Residential	California	12941717	587	13.8053	81.1	California
2008	Residential	Oregon	1616598	1026	8.49242	87.16	Oregon
2008	Residential	Washington	2789188	1086	7.54336	81.89	Washington
2008	Residential	Pacific Noncontiguous	678306	641	25.9841	166.46	Pacific Noncontiguous
2008	Residential	Alaska	268638	661	16.5483	109.31	Alaska
2008	Residential	Hawaii	409668	628	32.4963	203.94	Hawaii
2008	Residential	U.S. Total	124937469	920	11.2634	103.67	U.S. Total
2008	Commercial	New England	831567	5477	15.6414	856.72	New England
2008	Commercial	Connecticut	155328	7331	17.1198	1255.11	Connecticut
2008	Commercial	Maine	87761	3939	12.976	511.07	Maine
2008	Commercial	Massachusetts	379987	5830	15.8038	921.31	Massachusetts
2008	Commercial	New Hampshire	102942	3657	14.3182	523.68	New Hampshire
2008	Commercial	Rhode Island	55906	5516	15.3579	847.12	Rhode Island
2008	Commercial	Vermont	49643	3429	12.4913	428.37	Vermont
2008	Commercial	Middle Atlantic	2177783	6326	14.1239	893.54	Middle Atlantic
2008	Commercial	New Jersey	469341	7203	14.4836	1043.3	New Jersey
2008	Commercial	New York	1032105	6251	16.8375	1052.45	New York
2008	Commercial	Pennsylvania	676337	5834	9.37866	547.13	Pennsylvania
2008	Commercial	East North Central	2392686	6481	9.75255	632.11	East North Central
2008	Commercial	Illinois	586611	7354	11.7903	867.11	Illinois
2008	Commercial	Indiana	341154	6002	7.81685	469.14	Indiana
2008	Commercial	Michigan	518776	6261	9.19514	575.67	Michigan
2008	Commercial	Ohio	612492	6437	9.22411	593.74	Ohio
2008	Commercial	Wisconsin	333653	5863	9.27504	543.77	Wisconsin
2008	Commercial	West North Central	1346789	6150	7.12618	438.27	West North Central
2008	Commercial	Iowa	211241	4804	7.18372	345.11	Iowa
2008	Commercial	Kansas	219462	5832	7.42464	432.99	Kansas
2008	Commercial	Minnesota	270442	6965	7.87858	548.75	Minnesota
2008	Commercial	Missouri	371220	6985	6.6105	461.78	Missouri
2008	Commercial	Nebraska	152907	5144	6.6847	343.84	Nebraska
2008	Commercial	North Dakota	56510	6577	6.811	447.97	North Dakota
2008	Commercial	South Dakota	65007	5436	6.96759	378.74	South Dakota
2008	Commercial	South Atlantic	3525690	7245	9.30423	674.09	South Atlantic
2008	Commercial	Delaware	48966	7384	12.0652	890.91	Delaware
2008	Commercial	District of Columbia	30896	25058	13.2274	3314.57	District of Columbia
2008	Commercial	Florida	1129098	6879	10.135	697.19	Florida
2008	Commercial	Georgia	543498	7187	9.06662	651.66	Georgia
2008	Commercial	Maryland	241356	10359	12.7587	1321.7	Maryland
2008	Commercial	North Carolina	649617	5970	7.55181	450.83	North Carolina
2008	Commercial	South Carolina	342187	5279	8.42323	444.65	South Carolina
2008	Commercial	Virginia	404316	9662	7.32401	707.65	Virginia
2008	Commercial	West Virginia	135756	4736	6.07817	287.88	West Virginia
2008	Commercial	East South Central	1351903	5230	9.07447	474.63	East South Central
2008	Commercial	Alabama	371024	5061	9.86589	499.31	Alabama
2008	Commercial	Kentucky	296069	5536	7.28786	403.47	Kentucky
2008	Commercial	Mississippi	224391	4914	10.0163	492.23	Mississippi
2008	Commercial	Tennessee	460419	5324	9.23918	491.93	Tennessee
2008	Commercial	West South Central	2117544	6577	10.1141	665.26	West South Central
2008	Commercial	Arkansas	176049	5540	7.60786	421.46	Arkansas
2008	Commercial	Louisiana	265230	7207	10.1231	729.61	Louisiana
2008	Commercial	Oklahoma	264439	5995	7.8779	472.24	Oklahoma
2008	Commercial	Texas	1411826	6698	10.7457	719.72	Texas
2008	Commercial	Mountain	1318573	5967	8.36389	499.08	Mountain
2008	Commercial	Arizona	298347	8425	8.92894	752.25	Arizona
2008	Commercial	Colorado	359898	4759	8.57326	407.96	Colorado
2008	Commercial	Idaho	99003	5091	5.72304	291.37	Idaho
2008	Commercial	Montana	100371	4006	8.54268	342.25	Montana
2008	Commercial	Nevada	152735	5076	10.0688	511.12	Nevada
2008	Commercial	New Mexico	133782	5499	8.66826	476.68	New Mexico
2008	Commercial	Utah	115149	7444	6.66439	496.1	Utah
2008	Commercial	Wyoming	59288	6200	6.70826	415.94	Wyoming
2008	Commercial	Pacific Contiguous	2391475	5966	11.0305	658.11	Pacific Contiguous
2008	Commercial	California	1807261	5765	12.5391	722.88	California
2008	Commercial	Oregon	234525	5797	7.29168	422.67	Oregon
2008	Commercial	Washington	349689	7120	6.75891	481.25	Washington
2008	Commercial	Pacific Noncontiguous	108716	4869	22.5012	1095.57	Pacific Noncontiguous
2008	Commercial	Alaska	47032	5052	13.6354	688.85	Alaska
2008	Commercial	Hawaii	61684	4729	29.722	1405.68	Hawaii
2008	Commercial	U.S. Total	17562726	6339	10.3646	657.02	U.S. Total
2008	Industrial	New England	27920	64419	13.8031	8891.79	New England
2008	Industrial	Connecticut	5233	69611	14.9344	10395.9	Connecticut
2008	Industrial	Maine	2827	93578	11.704	10952.3	Maine
2008	Industrial	Massachusetts	14066	55284	14.8536	8211.72	Massachusetts
2008	Industrial	New Hampshire	3431	50161	13.1737	6608.11	New Hampshire
2008	Industrial	Rhode Island	2048	43761	14.2028	6215.25	Rhode Island
2008	Industrial	Vermont	315	413966	9.19284	38055.2	Vermont
2008	Industrial	Middle Atlantic	49710	122969	8.19546	10077.9	Middle Atlantic
2008	Industrial	New Jersey	13391	65574	10.8619	7122.62	New Jersey
2008	Industrial	New York	8779	139398	10.1369	14130.6	New York
2008	Industrial	Pennsylvania	27540	145639	7.01935	10222.9	Pennsylvania
2008	Industrial	East North Central	62775	278391	5.78677	16109.8	East North Central
2008	Industrial	Illinois	6016	630308	4.54279	28633.5	Illinois
2008	Industrial	Indiana	18099	222900	5.46124	12173.1	Indiana
2008	Industrial	Michigan	12776	212015	6.73681	14283.1	Michigan
2008	Industrial	Ohio	21201	230416	6.18992	14262.6	Ohio
2008	Industrial	Wisconsin	4683	439040	6.51032	28582.9	Wisconsin
2008	Industrial	West North Central	90173	80689	5.31585	4289.33	West North Central
2008	Industrial	Iowa	6187	259106	4.80757	12456.7	Iowa
2008	Industrial	Kansas	19554	45880	5.69122	2611.11	Kansas
2008	Industrial	Minnesota	9097	218116	5.87461	12813.5	Minnesota
2008	Industrial	Missouri	9431	157726	4.92187	7763.06	Missouri
2008	Industrial	Nebraska	40777	19668	5.15777	1014.42	Nebraska
2008	Industrial	North Dakota	2143	143759	5.58825	8033.64	North Dakota
2008	Industrial	South Dakota	2984	65016	5.30703	3450.4	South Dakota
2008	Industrial	South Atlantic	80654	155610	6.28189	9775.23	South Atlantic
2008	Industrial	Delaware	619	401416	10.4541	41964.3	Delaware
2008	Industrial	District of Columbia	13	1957346	10.4886	205297	District of Columbia
2008	Industrial	Florida	22383	70533	8.24543	5815.76	Florida
2008	Industrial	Georgia	15948	169973	6.67135	11339.5	Georgia
2008	Industrial	Maryland	8733	53914	10.3725	5592.2	Maryland
2008	Industrial	North Carolina	10968	211013	5.53523	11680	North Carolina
2008	Industrial	South Carolina	4691	519560	5.36698	27884.7	South Carolina
2008	Industrial	Virginia	5284	290779	5.81597	16911.6	Virginia
2008	Industrial	West Virginia	12015	102221	4.20443	4297.82	West Virginia
2008	Industrial	East South Central	25055	433001	5.75182	24905.4	East South Central
2008	Industrial	Alabama	9260	314881	6.11159	19244.3	Alabama
2008	Industrial	Kentucky	6304	610694	4.81507	29405.3	Kentucky
2008	Industrial	Mississippi	7397	182449	6.55627	11961.9	Mississippi
2008	Industrial	Tennessee	2094	1305467	6.29015	82115.7	Tennessee
2008	Industrial	West South Central	230697	59664	8.08337	4822.87	West South Central
2008	Industrial	Arkansas	31694	44799	5.8903	2638.82	Arkansas
2008	Industrial	Louisiana	20299	110562	7.94126	8780.03	Louisiana
2008	Industrial	Oklahoma	17620	72812	5.89617	4293.14	Oklahoma
2008	Industrial	Texas	161084	54737	8.79096	4811.87	Texas
2008	Industrial	Mountain	79952	84565	6.05252	5118.31	Mountain
2008	Industrial	Arizona	7314	146629	6.57383	9639.16	Arizona
2008	Industrial	Colorado	13170	87462	6.65038	5816.55	Colorado
2008	Industrial	Idaho	26210	29611	4.48457	1327.91	Idaho
2008	Industrial	Montana	4879	99601	5.90466	5881.08	Montana
2008	Industrial	Nevada	3608	319193	7.97863	25467.2	Nevada
2008	Industrial	New Mexico	6456	88175	6.38393	5629.02	New Mexico
2008	Industrial	Utah	9427	80320	4.58986	3686.58	Utah
2008	Industrial	Wyoming	8888	89636	4.47304	4009.43	Wyoming
2008	Industrial	Pacific Contiguous	125754	56389	7.94437	4479.75	Pacific Contiguous
2008	Industrial	California	77326	54996	10.0438	5523.65	California
2008	Industrial	Oregon	22394	48172	5.21012	2509.83	Oregon
2008	Industrial	Washington	26034	67595	4.54714	3073.64	Washington
2008	Industrial	Pacific Noncontiguous	2023	212088	22.9473	48668.3	Pacific Noncontiguous
2008	Industrial	Alaska	1350	82985	14.1731	11761.5	Alaska
2008	Industrial	Hawaii	673	471061	26.0479	122701	Hawaii
2008	Industrial	U.S. Total	774713	108567	6.82853	7413.54	U.S. Total
2009	Residential	New England	6136238	623	17.47	108.9	New England
2009	Residential	Connecticut	1447250	724	20.33	147.25	Connecticut
2009	Residential	Maine	696822	521	15.65	81.6	Maine
2009	Residential	Massachusetts	2661985	610	16.87	102.85	Massachusetts
2009	Residential	New Hampshire	591160	623	16.26	101.38	New Hampshire
2009	Residential	Rhode Island	432102	566	15.6	88.35	Rhode Island
2009	Residential	Vermont	306919	576	14.9	85.83	Vermont
2009	Residential	Middle Atlantic	15582581	690	14.84	102.38	Middle Atlantic
2009	Residential	New Jersey	3430837	676	16.31	110.29	New Jersey
2009	Residential	New York	6916413	581	17.5	101.71	New York
2009	Residential	Pennsylvania	5235331	842	11.65	98.09	Pennsylvania
2009	Residential	East North Central	19531947	779	10.92	85.09	East North Central
2009	Residential	Illinois	5074861	728	11.27	82.04	Illinois
2009	Residential	Indiana	2733611	992	9.5	94.3	Indiana
2009	Residential	Michigan	4253786	644	11.6	74.69	Michigan
2009	Residential	Ohio	4880393	878	10.67	93.66	Ohio
2009	Residential	Wisconsin	2589296	689	11.94	82.28	Wisconsin
2009	Residential	West North Central	9001636	942	9.14	86.1	West North Central
2009	Residential	Iowa	1324182	864	9.99	86.25	Iowa
2009	Residential	Kansas	1209522	906	9.53	86.37	Kansas
2009	Residential	Minnesota	2290881	802	10.04	80.48	Minnesota
2009	Residential	Missouri	2687756	1061	8.54	90.66	Missouri
2009	Residential	Nebraska	799623	1003	8.52	85.49	Nebraska
2009	Residential	North Dakota	322466	1150	7.58	87.17	North Dakota
2009	Residential	South Dakota	367206	1024	8.49	86.88	South Dakota
2009	Residential	South Atlantic	25669340	1123	11.32	127.16	South Atlantic
2009	Residential	Delaware	393836	917	14.07	129.07	Delaware
2009	Residential	District of Columbia	217635	712	13.76	97.94	District of Columbia
2009	Residential	Florida	8493591	1133	12.39	140.33	Florida
2009	Residential	Georgia	4061862	1132	10.13	114.64	Georgia
2009	Residential	Maryland	2188390	1026	14.98	153.72	Maryland
2009	Residential	North Carolina	4175829	1124	9.99	112.3	North Carolina
2009	Residential	South Carolina	2083432	1182	10.44	123.47	South Carolina
2009	Residential	Virginia	3189118	1170	10.61	124.06	Virginia
2009	Residential	West Virginia	865647	1116	7.9	88.16	West Virginia
2009	Residential	East South Central	7972331	1215	9.61	116.72	East South Central
2009	Residential	Alabama	2128009	1233	10.66	131.42	Alabama
2009	Residential	Kentucky	1922294	1150	8.37	96.26	Kentucky
2009	Residential	Mississippi	1243260	1213	10.22	124	Mississippi
2009	Residential	Tennessee	2678768	1248	9.32	116.35	Tennessee
2009	Residential	West South Central	14390523	1148	11.04	126.66	West South Central
2009	Residential	Arkansas	1315041	1076	9.14	98.38	Arkansas
2009	Residential	Louisiana	1946996	1273	8.1	103.19	Louisiana
2009	Residential	Oklahoma	1643674	1097	8.49	93.13	Oklahoma
2009	Residential	Texas	9484812	1140	12.38	141.2	Texas
2009	Residential	Mountain	8867490	878	10.18	89.38	Mountain
2009	Residential	Arizona	2544383	1076	10.73	115.42	Arizona
2009	Residential	Colorado	2111623	687	10	68.69	Colorado
2009	Residential	Idaho	659776	1080	7.8	84.27	Idaho
2009	Residential	Montana	464517	856	8.93	76.48	Montana
2009	Residential	Nevada	1054927	938	12.86	120.66	Nevada
2009	Residential	New Mexico	844865	642	10.02	64.3	New Mexico
2009	Residential	Utah	932016	780	8.48	66.16	Utah
2009	Residential	Wyoming	255383	887	8.58	76.12	Wyoming
2009	Residential	Pacific Contiguous	17342577	703	12.15	85.43	Pacific Contiguous
2009	Residential	California	12910856	580	14.74	85.45	California
2009	Residential	Oregon	1623388	1017	8.68	88.23	Oregon
2009	Residential	Washington	2808333	1091	7.68	83.72	Washington
2009	Residential	Pacific Noncontiguous	682512	632	21.31	134.59	Pacific Noncontiguous
2009	Residential	Alaska	269669	654	17.14	112.13	Alaska
2009	Residential	Hawaii	412843	617	24.2	149.25	Hawaii
2009	Residential	U.S. Total	125177175	908	11.51	104.52	U.S. Total
2009	Commercial	New England	810701	4649	15.23	707.9	New England
2009	Commercial	Connecticut	148175	7456	16.86	1257.12	Connecticut
2009	Commercial	Maine	87923	3859	12.55	484.06	Maine
2009	Commercial	Massachusetts	375507	3945	15.37	606.47	Massachusetts
2009	Commercial	New Hampshire	92630	3995	14.55	581.23	New Hampshire
2009	Commercial	Rhode Island	56385	5455	13.67	745.38	Rhode Island
2009	Commercial	Vermont	50081	3313	12.93	428.53	Vermont
2009	Commercial	Middle Atlantic	2190404	6130	13.38	820.19	Middle Atlantic
2009	Commercial	New Jersey	476354	6889	13.83	952.82	New Jersey
2009	Commercial	New York	1034835	6068	15.51	940.83	New York
2009	Commercial	Pennsylvania	679215	5694	9.54	543.37	Pennsylvania
2009	Commercial	East North Central	2388254	6271	9.84	617.3	East North Central
2009	Commercial	Illinois	575801	7284	11.31	823.87	Illinois
2009	Commercial	Indiana	341437	5782	8.32	481.01	Indiana
2009	Commercial	Michigan	520551	6063	9.24	560.11	Michigan
2009	Commercial	Ohio	613740	6160	9.65	594.58	Ohio
2009	Commercial	Wisconsin	336725	5562	9.57	532.08	Wisconsin
2009	Commercial	West North Central	1354165	6002	7.43	445.74	West North Central
2009	Commercial	Iowa	215993	4516	7.55	341.16	Iowa
2009	Commercial	Kansas	218800	5716	7.87	450.08	Kansas
2009	Commercial	Minnesota	273429	6800	7.92	538.24	Minnesota
2009	Commercial	Missouri	368476	6874	6.96	478.43	Missouri
2009	Commercial	Nebraska	154061	5038	7.33	369.34	Nebraska
2009	Commercial	North Dakota	57435	6614	6.81	450.33	North Dakota
2009	Commercial	South Dakota	65971	5354	7.14	382.27	South Dakota
2009	Commercial	South Atlantic	3531880	7179	9.61	689.94	South Atlantic
2009	Commercial	Delaware	49057	7109	11.98	851.69	Delaware
2009	Commercial	District of Columbia	30632	26426	12.96	3426.13	District of Columbia
2009	Commercial	Florida	1125135	6834	10.77	735.96	Florida
2009	Commercial	Georgia	545860	7035	8.94	629	Georgia
2009	Commercial	Maryland	242640	10237	11.97	1225.27	Maryland
2009	Commercial	North Carolina	650652	5922	7.98	472.59	North Carolina
2009	Commercial	South Carolina	343793	5197	8.74	454.02	South Carolina
2009	Commercial	Virginia	407458	9577	8.06	771.55	Virginia
2009	Commercial	West Virginia	136653	4692	6.77	317.55	West Virginia
2009	Commercial	East South Central	1325309	5130	9.26	474.84	East South Central
2009	Commercial	Alabama	353885	5161	10.05	518.89	Alabama
2009	Commercial	Kentucky	293614	5306	7.63	404.75	Kentucky
2009	Commercial	Mississippi	222861	4866	9.5	462.25	Mississippi
2009	Commercial	Tennessee	454949	5122	9.61	491.97	Tennessee
2009	Commercial	West South Central	2147984	6670	8.94	596.11	West South Central
2009	Commercial	Arkansas	177635	5384	7.56	406.96	Arkansas
2009	Commercial	Louisiana	269166	7214	7.69	555.09	Louisiana
2009	Commercial	Oklahoma	266110	5844	6.76	394.92	Oklahoma
2009	Commercial	Texas	1435073	6881	9.66	664.53	Texas
2009	Commercial	Mountain	1315787	5851	8.53	498.84	Mountain
2009	Commercial	Arizona	299528	8176	9.35	764.52	Arizona
2009	Commercial	Colorado	349267	4774	8.15	389.18	Colorado
2009	Commercial	Idaho	100210	4994	6.49	323.89	Idaho
2009	Commercial	Montana	100207	3975	8.32	330.65	Montana
2009	Commercial	Nevada	153621	4855	10.64	516.7	Nevada
2009	Commercial	New Mexico	135702	5364	8.4	450.45	New Mexico
2009	Commercial	Utah	117905	7234	6.96	503.23	Utah
2009	Commercial	Wyoming	59347	6021	7.28	438.43	Wyoming
2009	Commercial	Pacific Contiguous	2388971	5830	11.69	681.62	Pacific Contiguous
2009	Commercial	California	1801936	5601	13.42	751.56	California
2009	Commercial	Oregon	236230	5636	7.49	421.92	Oregon
2009	Commercial	Washington	350805	7140	6.96	497.24	Washington
2009	Commercial	Pacific Noncontiguous	108206	4797	18.48	886.72	Pacific Noncontiguous
2009	Commercial	Alaska	47337	5002	14.46	723.13	Alaska
2009	Commercial	Hawaii	60869	4638	21.86	1013.94	Hawaii
2009	Commercial	U.S. Total	17561661	6203	10.26	636.36	U.S. Total
2009	Industrial	New England	29347	78112	13.44	10497.6	New England
2009	Industrial	Connecticut	4881	63034	14.92	9404.38	Connecticut
2009	Industrial	Maine	2857	83185	9.95	8277.7	Maine
2009	Industrial	Massachusetts	16173	86328	14.08	12158.2	Massachusetts
2009	Industrial	New Hampshire	3197	47863	13.83	6619.43	New Hampshire
2009	Industrial	Rhode Island	2014	40974	12.25	5018.34	Rhode Island
2009	Industrial	Vermont	225	512404	9.21	47194.1	Vermont
2009	Industrial	Middle Atlantic	49232	110393	8.15	9002.46	Middle Atlantic
2009	Industrial	New Jersey	13255	51868	11.81	6127.09	New Jersey
2009	Industrial	New York	8565	130537	8.98	11728.2	New York
2009	Industrial	Pennsylvania	27412	132399	7.21	9541.18	Pennsylvania
2009	Industrial	East North Central	62817	243868	6	14642.6	East North Central
2009	Industrial	Illinois	5893	586958	4.33	25400	Illinois
2009	Industrial	Indiana	18264	196448	5.81	11409.4	Indiana
2009	Industrial	Michigan	13065	174710	6.99	12205	Michigan
2009	Industrial	Ohio	21088	195553	6.71	13117.6	Ohio
2009	Industrial	Wisconsin	4507	413977	6.73	27880	Wisconsin
2009	Industrial	West North Central	94819	68902	5.72	3943.49	West North Central
2009	Industrial	Iowa	6608	229664	5.27	12113	Iowa
2009	Industrial	Kansas	22873	36751	6.1	2243.07	Kansas
2009	Industrial	Minnesota	9425	173626	6.26	10867	Minnesota
2009	Industrial	Missouri	8982	139636	5.42	7569.21	Missouri
2009	Industrial	Nebraska	41391	19149	5.75	1101.53	Nebraska
2009	Industrial	North Dakota	2488	121958	5.25	6399.79	North Dakota
2009	Industrial	South Dakota	3052	61721	5.65	3488.08	South Dakota
2009	Industrial	South Atlantic	79330	139480	6.69	9330.17	South Atlantic
2009	Industrial	Delaware	1242	183705	9.34	17165.1	Delaware
2009	Industrial	District of Columbia	4	6354250	8.41	534538	District of Columbia
2009	Industrial	Florida	20457	68917	9.32	6422.81	Florida
2009	Industrial	Georgia	15487	157918	6.12	9661.97	Georgia
2009	Industrial	Maryland	8773	50209	9.92	4978.5	Maryland
2009	Industrial	North Carolina	11375	183880	5.99	11014.7	North Carolina
2009	Industrial	South Carolina	4501	470662	5.79	27251.1	South Carolina
2009	Industrial	Virginia	5284	263026	6.91	18179.1	Virginia
2009	Industrial	West Virginia	12207	74992	5.24	3931.7	West Virginia
2009	Industrial	East South Central	25495	374369	5.83	21841	East South Central
2009	Industrial	Alabama	9252	265138	5.96	15807.4	Alabama
2009	Industrial	Kentucky	7056	514786	4.91	25300.4	Kentucky
2009	Industrial	Mississippi	7151	174107	6.61	11513.5	Mississippi
2009	Industrial	Tennessee	2036	1087479	6.76	73543.3	Tennessee
2009	Industrial	West South Central	204264	61802	6.21	3840.17	West South Central
2009	Industrial	Arkansas	31757	38601	5.76	2223.73	Arkansas
2009	Industrial	Louisiana	18534	115163	5.25	6050.34	Louisiana
2009	Industrial	Oklahoma	17752	66816	4.82	3220.54	Oklahoma
2009	Industrial	Texas	136221	59298	6.74	3997.04	Texas
2009	Industrial	Mountain	82817	76213	6.09	4639.15	Mountain
2009	Industrial	Arizona	7204	129562	6.65	8622.26	Arizona
2009	Industrial	Colorado	14918	75810	6.39	4843.28	Colorado
2009	Industrial	Idaho	26570	25702	5.17	1329.45	Idaho
2009	Industrial	Montana	5225	76117	5.45	4148.97	Montana
2009	Industrial	Nevada	3648	307133	7.97	24488.1	Nevada
2009	Industrial	New Mexico	6837	78119	5.72	4467.17	New Mexico
2009	Industrial	Utah	9480	75543	4.81	3635.9	Utah
2009	Industrial	Wyoming	8935	89109	4.83	4307.66	Wyoming
2009	Industrial	Pacific Contiguous	127343	54283	7.83	4248.09	Pacific Contiguous
2009	Industrial	California	76223	52297	10.07	5264.98	California
2009	Industrial	Oregon	22485	43589	5.45	2376.08	Oregon
2009	Industrial	Washington	28635	67966	4.43	3011.2	Washington
2009	Industrial	Pacific Noncontiguous	2055	202528	16.83	34085.7	Pacific Noncontiguous
2009	Industrial	Alaska	1367	79946	13.15	10510.5	Alaska
2009	Industrial	Hawaii	688	446088	18.14	80927.5	Hawaii
2009	Industrial	U.S. Total	757519	100926	6.7	6761.05	U.S. Total
2010	Industrial	New England	29645	79375	12.98	10302.5	New England
2010	Industrial	Connecticut	4973	62219	14.5	9022.73	Connecticut
2010	Industrial	Maine	2821	90359	9.17	8283.87	Maine
2010	Industrial	Massachusetts	16162	88253	13.71	12102.2	Massachusetts
2010	Industrial	New Hampshire	3495	46308	12.75	5903.81	New Hampshire
2010	Industrial	Rhode Island	1975	40541	11.82	4790.96	Rhode Island
2010	Industrial	Vermont	219	550213	9.53	52454.8	Vermont
2010	Industrial	Middle Atlantic	48617	115472	8.4	9702.48	Middle Atlantic
2010	Industrial	New Jersey	12960	54196	11.81	6399.05	New Jersey
2010	Industrial	New York	8364	134310	8.78	11796	New York
2010	Industrial	Pennsylvania	27293	138795	7.66	10629.5	Pennsylvania
2010	Industrial	East North Central	62803	262903	6.53	17162.4	East North Central
2010	Industrial	Illinois	5991	614535	6.82	41911.8	Illinois
2010	Industrial	Indiana	18796	206390	5.87	12123.5	Indiana
2010	Industrial	Michigan	12827	200362	7.08	14180.8	Michigan
2010	Industrial	Ohio	20693	213878	6.4	13682.6	Ohio
2010	Industrial	Wisconsin	4496	434679	6.85	29771.5	Wisconsin
2010	Industrial	West North Central	99871	71813	5.86	4207.3	West North Central
2010	Industrial	Iowa	6555	239831	5.36	12857.1	Iowa
2010	Industrial	Kansas	23304	38086	6.23	2374.64	Kansas
2010	Industrial	Minnesota	10150	187174	6.29	11767.5	Minnesota
2010	Industrial	Missouri	8899	162286	5.5	8930.37	Missouri
2010	Industrial	Nebraska	45032	18895	6	1134.36	Nebraska
2010	Industrial	North Dakota	2641	121468	5.81	7060.46	North Dakota
2010	Industrial	South Dakota	3290	59783	6.07	3626.03	South Dakota
2010	Industrial	South Atlantic	76925	150079	6.66	9988.46	South Atlantic
2010	Industrial	Delaware	1241	169617	9.57	16235.8	Delaware
2010	Industrial	District of Columbia	1	19133083	7.78	1.48907e+06	District of Columbia
2010	Industrial	Florida	18048	79719	8.85	7058	Florida
2010	Industrial	Georgia	15648	165340	6.22	10289.4	Georgia
2010	Industrial	Maryland	8766	48322	9.57	4625.39	Maryland
2010	Industrial	North Carolina	11016	199073	6.17	12279.3	North Carolina
2010	Industrial	South Carolina	4477	508284	5.74	29184.1	South Carolina
2010	Industrial	Virginia	5380	265508	6.66	17678.5	Virginia
2010	Industrial	West Virginia	12348	78440	5.86	4595.98	West Virginia
2010	Industrial	East South Central	23007	441927	5.83	25773.6	East South Central
2010	Industrial	Alabama	6915	389848	6.01	23440	Alabama
2010	Industrial	Kentucky	7268	516217	5.05	26071	Kentucky
2010	Industrial	Mississippi	6797	192577	6.32	12174.1	Mississippi
2010	Industrial	Tennessee	2027	1189345	6.58	78270.7	Tennessee
2010	Industrial	West South Central	196500	67798	6.12	4152.05	West South Central
2010	Industrial	Arkansas	32408	43134	5.44	2348.24	Arkansas
2010	Industrial	Louisiana	18128	129573	5.84	7568.84	Louisiana
2010	Industrial	Oklahoma	18356	68788	5.35	3680.85	Oklahoma
2010	Industrial	Texas	127608	65144	6.44	4192.55	Texas
2010	Industrial	Mountain	82574	78736	6.13	4824.12	Mountain
2010	Industrial	Arizona	7143	133487	6.63	8853.77	Arizona
2010	Industrial	Colorado	15060	83952	6.9	5796.27	Colorado
2010	Industrial	Idaho	26047	28142	5.15	1448.36	Idaho
2010	Industrial	Montana	5217	62155	5.49	3411.07	Montana
2010	Industrial	Nevada	3484	315244	7.37	23239.8	Nevada
2010	Industrial	New Mexico	7259	76458	6.01	4593.4	New Mexico
2010	Industrial	Utah	9431	77830	4.93	3839.18	Utah
2010	Industrial	Wyoming	8933	93932	4.98	4676.34	Wyoming
2010	Industrial	Pacific Contiguous	125768	58071	7.47	4339.07	Pacific Contiguous
2010	Industrial	California	75160	54662	9.8	5355.65	California
2010	Industrial	Oregon	22638	43100	5.41	2330.44	Oregon
2010	Industrial	Washington	27970	79349	4.07	3233.1	Washington
2010	Industrial	Pacific Noncontiguous	2036	204509	19.88	40652.2	Pacific Noncontiguous
2010	Industrial	Alaska	1350	81734	14.14	11561.1	Alaska
2010	Industrial	Hawaii	686	446123	21.94	97901.5	Hawaii
2010	Industrial	U.S. Total	747746	108200	6.77	7327.63	U.S. Total
2010	Commercial	New England	833718	4593	14.72	676.14	New England
2010	Commercial	Connecticut	153847	7273	16.45	1196.26	Connecticut
2010	Commercial	Maine	88266	3872	12.51	484.48	Maine
2010	Commercial	Massachusetts	379709	4004	14.53	581.81	Massachusetts
2010	Commercial	New Hampshire	104612	3555	14.26	506.84	New Hampshire
2010	Commercial	Rhode Island	56664	5432	13.11	711.85	Rhode Island
2010	Commercial	Vermont	50620	3327	13.44	447.01	Vermont
2010	Commercial	Middle Atlantic	2195721	6253	13.93	871.32	Middle Atlantic
2010	Commercial	New Jersey	478687	6985	13.89	970.02	New Jersey
2010	Commercial	New York	1038260	6202	16.31	1011.56	New York
2010	Commercial	Pennsylvania	678774	5815	10.1	587.19	Pennsylvania
2010	Commercial	East North Central	2392108	6391	9.36	598.28	East North Central
2010	Commercial	Illinois	578768	7406	8.88	657.52	Illinois
2010	Commercial	Indiana	341727	5942	8.38	497.66	Indiana
2010	Commercial	Michigan	520233	6107	9.81	599.23	Michigan
2010	Commercial	Ohio	612974	6325	9.73	615.73	Ohio
2010	Commercial	Wisconsin	338406	5664	9.98	565.49	Wisconsin
2010	Commercial	West North Central	1364074	6110	7.87	480.61	West North Central
2010	Commercial	Iowa	217704	4603	7.91	364.23	Iowa
2010	Commercial	Kansas	220091	5844	8.25	481.9	Kansas
2010	Commercial	Minnesota	276463	6787	8.38	568.83	Minnesota
2010	Commercial	Missouri	370955	7061	7.5	529.72	Missouri
2010	Commercial	Nebraska	154015	5158	7.63	393.79	Nebraska
2010	Commercial	North Dakota	58568	6707	7.21	483.78	North Dakota
2010	Commercial	South Dakota	66278	5492	7.55	414.71	South Dakota
2010	Commercial	South Atlantic	3535981	7307	9.29	678.87	South Atlantic
2010	Commercial	Delaware	49986	7202	11.36	818.33	Delaware
2010	Commercial	District of Columbia	26449	29016	13.42	3894.19	District of Columbia
2010	Commercial	Florida	1127138	6773	9.76	661.09	Florida
2010	Commercial	Georgia	546011	7310	9.06	662.09	Georgia
2010	Commercial	Maryland	244264	10498	11.75	1233.62	Maryland
2010	Commercial	North Carolina	644609	6197	8.16	505.55	North Carolina
2010	Commercial	South Carolina	340365	5465	8.9	486.35	South Carolina
2010	Commercial	Virginia	419950	9532	7.65	729.5	Virginia
2010	Commercial	West Virginia	137209	4836	7.66	370.5	West Virginia
2010	Commercial	East South Central	1338267	5330	9.34	497.75	East South Central
2010	Commercial	Alabama	356296	5376	10.18	547.09	Alabama
2010	Commercial	Kentucky	297050	5445	7.88	429.12	Kentucky
2010	Commercial	Mississippi	224517	5124	9.32	477.3	Mississippi
2010	Commercial	Tennessee	460404	5321	9.66	513.81	Tennessee
2010	Commercial	West South Central	2174738	6777	8.78	594.96	West South Central
2010	Commercial	Arkansas	178962	5675	7.31	414.72	Arkansas
2010	Commercial	Louisiana	274177	7356	8.5	625.39	Louisiana
2010	Commercial	Oklahoma	261932	6046	7.45	450.19	Oklahoma
2010	Commercial	Texas	1459667	6935	9.19	637.32	Texas
2010	Commercial	Mountain	1324994	5778	8.75	505.78	Mountain
2010	Commercial	Arizona	300507	8026	9.47	760.29	Arizona
2010	Commercial	Colorado	350073	4665	9.13	426.11	Colorado
2010	Commercial	Idaho	101268	4826	6.64	320.43	Idaho
2010	Commercial	Montana	101129	3946	8.55	337.34	Montana
2010	Commercial	Nevada	154455	4839	9.78	473.52	Nevada
2010	Commercial	New Mexico	135580	5541	8.57	474.87	New Mexico
2010	Commercial	Utah	122340	7062	7.15	504.76	Utah
2010	Commercial	Wyoming	59642	6032	7.42	447.3	Wyoming
2010	Commercial	Pacific Contiguous	2406414	5729	11.58	663.62	Pacific Contiguous
2010	Commercial	California	1814634	5564	13.1	728.58	California
2010	Commercial	Oregon	238450	5401	7.59	409.87	Oregon
2010	Commercial	Washington	353330	6800	7.37	501.22	Washington
2010	Commercial	Pacific Noncontiguous	108323	4758	20.45	972.73	Pacific Noncontiguous
2010	Commercial	Alaska	47844	4929	13.95	687.36	Alaska
2010	Commercial	Hawaii	60479	4622	25.93	1198.48	Hawaii
2010	Commercial	U.S. Total	17674338	6272	10.19	639.15	U.S. Total
2010	Residential	New England	6162023	657	16.24	106.66	New England
2010	Residential	Connecticut	1451808	750	19.25	144.4	Connecticut
2010	Residential	Maine	699625	521	15.71	81.83	Maine
2010	Residential	Massachusetts	2674717	667	14.59	97.34	Massachusetts
2010	Residential	New Hampshire	597411	626	16.32	102.11	New Hampshire
2010	Residential	Rhode Island	430623	603	15.92	96.08	Rhode Island
2010	Residential	Vermont	307839	576	15.57	89.71	Vermont
2010	Residential	Middle Atlantic	15654034	727	15.81	114.91	Middle Atlantic
2010	Residential	New Jersey	3454840	731	16.57	121.13	New Jersey
2010	Residential	New York	6954916	610	18.74	114.39	New York
2010	Residential	Pennsylvania	5244278	878	12.7	111.5	Pennsylvania
2010	Residential	East North Central	19529930	832	11.41	94.96	East North Central
2010	Residential	Illinois	5070056	799	11.52	92.03	Illinois
2010	Residential	Indiana	2742789	1065	9.56	101.79	Indiana
2010	Residential	Michigan	4245158	681	12.46	84.82	Michigan
2010	Residential	Ohio	4877229	931	11.32	105.33	Ohio
2010	Residential	Wisconsin	2594698	716	12.65	90.59	Wisconsin
2010	Residential	West North Central	9035108	994	9.64	95.87	West North Central
2010	Residential	Iowa	1327896	913	10.42	95.19	Iowa
2010	Residential	Kansas	1213036	985	10.03	98.73	Kansas
2010	Residential	Minnesota	2300291	814	10.59	86.19	Minnesota
2010	Residential	Missouri	2695809	1153	9.08	104.66	Missouri
2010	Residential	Nebraska	801101	1051	8.94	93.97	Nebraska
2010	Residential	North Dakota	326409	1121	8.13	91.16	North Dakota
2010	Residential	South Dakota	370566	1041	8.97	93.4	South Dakota
2010	Residential	South Atlantic	25809130	1212	10.96	132.94	South Atlantic
2010	Residential	Delaware	396114	1001	13.8	138.24	Delaware
2010	Residential	District of Columbia	227550	778	14.01	108.93	District of Columbia
2010	Residential	Florida	8529204	1194	11.44	136.61	Florida
2010	Residential	Georgia	4054145	1265	10.07	127.41	Georgia
2010	Residential	Maryland	2200368	1096	14.32	156.94	Maryland
2010	Residential	North Carolina	4185540	1238	10.12	125.2	North Carolina
2010	Residential	South Carolina	2089302	1310	10.5	137.59	South Carolina
2010	Residential	Virginia	3258959	1239	10.45	129.43	Virginia
2010	Residential	West Virginia	867948	1195	8.79	105.05	West Virginia
2010	Residential	East South Central	8023780	1350	9.58	129.32	East South Central
2010	Residential	Alabama	2138911	1384	10.67	147.69	Alabama
2010	Residential	Kentucky	1930666	1258	8.57	107.77	Kentucky
2010	Residential	Mississippi	1250149	1345	9.87	132.76	Mississippi
2010	Residential	Tennessee	2704054	1393	9.23	128.58	Tennessee
2010	Residential	West South Central	14493438	1223	10.67	130.57	West South Central
2010	Residential	Arkansas	1322833	1211	8.86	107.28	Arkansas
2010	Residential	Louisiana	1973174	1380	8.98	123.96	Louisiana
2010	Residential	Oklahoma	1660653	1189	9.14	108.61	Oklahoma
2010	Residential	Texas	9536778	1199	11.6	138.99	Texas
2010	Residential	Mountain	8921694	872	10.49	91.49	Mountain
2010	Residential	Arizona	2554213	1059	10.97	116.09	Arizona
2010	Residential	Colorado	2128507	709	11.04	78.22	Colorado
2010	Residential	Idaho	664717	1020	7.99	81.46	Idaho
2010	Residential	Montana	467878	845	9.16	77.37	Montana
2010	Residential	Nevada	1058519	914	12.36	113.03	Nevada
2010	Residential	New Mexico	853811	659	10.52	69.35	New Mexico
2010	Residential	Utah	936602	786	8.71	68.43	Utah
2010	Residential	Wyoming	257447	883	8.77	77.43	Wyoming
2010	Residential	Pacific Contiguous	17402274	675	12.31	83.09	Pacific Contiguous
2010	Residential	California	12947917	562	14.75	82.85	California
2010	Residential	Oregon	1629076	964	8.87	85.52	Oregon
2010	Residential	Washington	2825281	1030	8.04	82.75	Washington
2010	Residential	Pacific Noncontiguous	686524	617	23.22	143.28	Pacific Noncontiguous
2010	Residential	Alaska	271956	641	16.26	104.29	Alaska
2010	Residential	Hawaii	414568	601	28.1	168.86	Hawaii
2010	Residential	U.S. Total	125717935	958	11.54	110.55	U.S. Total
2011	Industrial	New England	34271	67907	12.55	8520.25	New England
2011	Industrial	Connecticut	4757	64260	13.24	8508.16	Connecticut
2011	Industrial	Maine	2823	89023	8.88	7908.07	Maine
2011	Industrial	Massachusetts	21021	67288	13.38	9000.45	Massachusetts
2011	Industrial	New Hampshire	3491	46224	12.27	5669.84	New Hampshire
2011	Industrial	Rhode Island	1958	38979	11.27	4394.53	Rhode Island
2011	Industrial	Vermont	221	534353	9.83	52503.4	Vermont
2011	Industrial	Middle Atlantic	45984	128738	8.17	10516.4	Middle Atlantic
2011	Industrial	New Jersey	12715	52649	11.43	6015.64	New Jersey
2011	Industrial	New York	8222	136019	7.83	10656.8	New York
2011	Industrial	Pennsylvania	25047	164975	7.73	12755.1	Pennsylvania
2011	Industrial	East North Central	60934	275657	6.53	17988.1	East North Central
2011	Industrial	Illinois	5843	639570	6.42	41060.3	Illinois
2011	Industrial	Indiana	17891	222524	6.17	13720.8	Indiana
2011	Industrial	Michigan	12961	203329	7.32	14884.6	Michigan
2011	Industrial	Ohio	19712	227921	6.12	13943.6	Ohio
2011	Industrial	Wisconsin	4527	430872	7.33	31570.2	Wisconsin
2011	Industrial	West North Central	108713	67832	6.08	4123.75	West North Central
2011	Industrial	Iowa	7378	217315	5.21	11326.9	Iowa
2011	Industrial	Kansas	23986	37548	6.71	2519.88	Kansas
2011	Industrial	Minnesota	10673	184412	6.47	11926.7	Minnesota
2011	Industrial	Missouri	8759	164875	5.85	9639.49	Missouri
2011	Industrial	Nebraska	51373	17178	6.43	1104.7	Nebraska
2011	Industrial	North Dakota	3639	98895	6.24	6171.01	North Dakota
2011	Industrial	South Dakota	2905	74193	6.2	4598.82	South Dakota
2011	Industrial	South Atlantic	75311	154701	6.66	10309.4	South Atlantic
2011	Industrial	Delaware	1238	174432	8.91	15543.7	Delaware
2011	Industrial	District of Columbia	1	18020333	6.89	1240750	District of Columbia
2011	Industrial	Florida	17335	81173	8.55	6941.28	Florida
2011	Industrial	Georgia	16241	161736	6.6	10673	Georgia
2011	Industrial	Maryland	8900	46886	8.76	4108.44	Maryland
2011	Industrial	North Carolina	10609	208586	6.01	12546.2	North Carolina
2011	Industrial	South Carolina	4459	525043	5.94	31188.3	South Carolina
2011	Industrial	Virginia	4082	351503	6.49	22824.3	Virginia
2011	Industrial	West Virginia	12446	78475	6.18	4849.24	West Virginia
2011	Industrial	East South Central	22865	445574	6.19	27574.1	East South Central
2011	Industrial	Alabama	6491	433105	6.25	27052.9	Alabama
2011	Industrial	Kentucky	7426	489490	5.33	26104	Kentucky
2011	Industrial	Mississippi	6931	195537	6.53	12772.2	Mississippi
2011	Industrial	Tennessee	2017	1183212	7.23	85528.1	Tennessee
2011	Industrial	West South Central	168126	81779	6	4906.49	West South Central
2011	Industrial	Arkansas	32761	43227	5.63	2434.4	Arkansas
2011	Industrial	Louisiana	18090	138467	5.69	7880.02	Louisiana
2011	Industrial	Oklahoma	18242	72218	5.46	3943.34	Oklahoma
2011	Industrial	Texas	99033	85938	6.24	5358.52	Texas
2011	Industrial	Mountain	85326	78536	6.08	4777.91	Mountain
2011	Industrial	Arizona	7212	142728	6.55	9355.42	Arizona
2011	Industrial	Colorado	16425	77330	7.06	5458.56	Colorado
2011	Industrial	Idaho	26258	28285	5.1	1443.12	Idaho
2011	Industrial	Montana	5877	56473	5.27	2978.58	Montana
2011	Industrial	Nevada	3506	318976	6.65	21201.5	Nevada
2011	Industrial	New Mexico	7603	75741	6.06	4591.04	New Mexico
2011	Industrial	Utah	9378	82933	5.1	4228.6	Utah
2011	Industrial	Wyoming	9067	94316	5.41	5101.91	Wyoming
2011	Industrial	Pacific Contiguous	124442	60156	7.62	4582.07	Pacific Contiguous
2011	Industrial	California	73297	56773	10.11	5737.46	California
2011	Industrial	Oregon	23300	42787	5.47	2338.89	Oregon
2011	Industrial	Washington	27845	83596	4.09	3417.73	Washington
2011	Industrial	Pacific Noncontiguous	1948	213702	25.02	53466.6	Pacific Noncontiguous
2011	Industrial	Alaska	1250	88714	15.71	13935.6	Alaska
2011	Industrial	Hawaii	698	437533	28.4	124260	Hawaii
2011	Industrial	U.S. Total	727920	113487	6.82	7739.6	U.S. Total
2011	Residential	New England	6189701	639	15.89	101.6	New England
2011	Residential	Connecticut	1453864	740	18.11	134.07	Connecticut
2011	Residential	Maine	701335	521	15.38	80.09	Maine
2011	Residential	Massachusetts	2693548	633	14.67	92.92	Massachusetts
2011	Residential	New Hampshire	599532	619	16.52	102.28	New Hampshire
2011	Residential	Rhode Island	432430	603	14.33	86.44	Rhode Island
2011	Residential	Vermont	308992	573	16.26	93.19	Vermont
2011	Residential	Middle Atlantic	15694783	719	15.8	113.6	Middle Atlantic
2011	Residential	New Jersey	3457325	709	16.23	115.04	New Jersey
2011	Residential	New York	6987631	611	18.26	111.59	New York
2011	Residential	Pennsylvania	5249827	870	13.26	115.33	Pennsylvania
2011	Residential	East North Central	19559825	816	11.79	96.26	East North Central
2011	Residential	Illinois	5089449	770	11.78	90.8	Illinois
2011	Residential	Indiana	2744879	1030	10.06	103.54	Indiana
2011	Residential	Michigan	4249136	683	13.27	90.63	Michigan
2011	Residential	Ohio	4874482	918	11.42	104.86	Ohio
2011	Residential	Wisconsin	2601879	709	13.02	92.39	Wisconsin
2011	Residential	West North Central	9057982	978	10.12	98.91	West North Central
2011	Residential	Iowa	1329905	898	10.46	93.94	Iowa
2011	Residential	Kansas	1215411	983	10.65	104.7	Kansas
2011	Residential	Minnesota	2308736	813	10.96	89.14	Minnesota
2011	Residential	Missouri	2693261	1112	9.75	108.39	Missouri
2011	Residential	Nebraska	805671	1029	9.32	95.92	Nebraska
2011	Residential	North Dakota	330738	1147	8.58	98.46	North Dakota
2011	Residential	South Dakota	374260	1035	9.35	96.78	South Dakota
2011	Residential	South Atlantic	25864527	1142	11.19	127.75	South Atlantic
2011	Residential	Delaware	398109	970	13.7	132.83	Delaware
2011	Residential	District of Columbia	229450	749	13.4	100.3	District of Columbia
2011	Residential	Florida	8575892	1131	11.51	130.1	Florida
2011	Residential	Georgia	4056147	1186	11.05	131.15	Georgia
2011	Residential	Maryland	2208015	1030	13.31	137.17	Maryland
2011	Residential	North Carolina	4201898	1151	10.26	118.09	North Carolina
2011	Residential	South Carolina	2101585	1221	11.05	135.01	South Carolina
2011	Residential	Virginia	3225395	1183	10.64	125.86	Virginia
2011	Residential	West Virginia	868036	1128	9.39	105.89	West Virginia
2011	Residential	East South Central	8030901	1272	10.14	128.97	East South Central
2011	Residential	Alabama	2142625	1284	11.09	142.41	Alabama
2011	Residential	Kentucky	1928523	1175	9.2	108.16	Kentucky
2011	Residential	Mississippi	1251640	1287	10.17	130.9	Mississippi
2011	Residential	Tennessee	2708113	1325	9.98	132.26	Tennessee
2011	Residential	West South Central	14596165	1261	10.42	131.42	West South Central
2011	Residential	Arkansas	1328286	1179	9.02	106.27	Arkansas
2011	Residential	Louisiana	1979175	1348	8.96	120.84	Louisiana
2011	Residential	Oklahoma	1667223	1221	9.47	115.61	Oklahoma
2011	Residential	Texas	9621481	1262	11.08	139.81	Texas
2011	Residential	Mountain	8983640	879	10.56	92.87	Mountain
2011	Residential	Arizona	2575586	1070	11.08	118.62	Arizona
2011	Residential	Colorado	2141780	711	11.27	80.12	Colorado
2011	Residential	Idaho	667243	1048	7.87	82.5	Idaho
2011	Residential	Montana	469963	871	9.75	84.97	Montana
2011	Residential	Nevada	1067944	897	11.61	104.1	Nevada
2011	Residential	New Mexico	856128	669	11	73.57	New Mexico
2011	Residential	Utah	946468	788	8.96	70.61	Utah
2011	Residential	Wyoming	258528	903	9.11	82.28	Wyoming
2011	Residential	Pacific Contiguous	17474162	688	12.43	85.48	Pacific Contiguous
2011	Residential	California	13002980	567	14.78	83.7	California
2011	Residential	Oregon	1633551	991	9.54	94.51	Oregon
2011	Residential	Washington	2837631	1068	8.28	88.41	Washington
2011	Residential	Pacific Noncontiguous	691386	610	27.49	167.74	Pacific Noncontiguous
2011	Residential	Alaska	273855	649	17.62	114.42	Alaska
2011	Residential	Hawaii	417531	585	34.68	202.72	Hawaii
2011	Residential	U.S. Total	126143072	940	11.72	110.14	U.S. Total
2011	Commercial	New England	841557	4458	14.31	637.82	New England
2011	Commercial	Connecticut	150087	7266	15.57	1131.51	Connecticut
2011	Commercial	Maine	88791	3771	12.29	463.51	Maine
2011	Commercial	Massachusetts	389864	3798	14.33	544.37	Massachusetts
2011	Commercial	New Hampshire	104610	3567	14.04	500.93	New Hampshire
2011	Commercial	Rhode Island	57409	5313	12.37	657.14	Rhode Island
2011	Commercial	Vermont	50796	3295	14	461.16	Vermont
2011	Commercial	Middle Atlantic	2202412	6018	13.65	821.54	Middle Atlantic
2011	Commercial	New Jersey	481663	6768	13.47	911.35	New Jersey
2011	Commercial	New York	1035992	6146	15.81	971.64	New York
2011	Commercial	Pennsylvania	684757	5298	10.03	531.26	Pennsylvania
2011	Commercial	East North Central	2404143	6356	9.49	603.25	East North Central
2011	Commercial	Illinois	587337	7161	8.64	618.78	Illinois
2011	Commercial	Indiana	343626	5847	8.77	513.04	Indiana
2011	Commercial	Michigan	521322	6172	10.33	637.64	Michigan
2011	Commercial	Ohio	611235	6423	9.63	618.26	Ohio
2011	Commercial	Wisconsin	340623	5640	10.42	587.89	Wisconsin
2011	Commercial	West North Central	1365998	6069	8.23	499.35	West North Central
2011	Commercial	Iowa	219229	4595	7.85	360.85	Iowa
2011	Commercial	Kansas	221844	5863	8.78	514.76	Kansas
2011	Commercial	Minnesota	276286	6748	8.63	582.1	Minnesota
2011	Commercial	Missouri	370920	6956	8.04	559.61	Missouri
2011	Commercial	Nebraska	148927	5114	7.99	408.39	Nebraska
2011	Commercial	North Dakota	60017	6757	7.61	513.86	North Dakota
2011	Commercial	South Dakota	68775	5388	7.76	417.87	South Dakota
2011	Commercial	South Atlantic	3547419	7178	9.46	679.18	South Atlantic
2011	Commercial	Delaware	50369	7048	10.64	749.74	Delaware
2011	Commercial	District of Columbia	26496	28199	12.9	3638.99	District of Columbia
2011	Commercial	Florida	1139656	6711	9.85	661	Florida
2011	Commercial	Georgia	548674	7128	9.87	703.41	Georgia
2011	Commercial	Maryland	245003	10459	11.28	1179.53	Maryland
2011	Commercial	North Carolina	644926	6004	8.13	488.42	North Carolina
2011	Commercial	South Carolina	340193	5289	9.3	491.76	South Carolina
2011	Commercial	Virginia	414137	9468	7.95	753.15	Virginia
2011	Commercial	West Virginia	137965	4692	8.14	382.04	West Virginia
2011	Commercial	East South Central	1340652	5205	9.8	509.88	East South Central
2011	Commercial	Alabama	356074	5209	10.47	545.62	Alabama
2011	Commercial	Kentucky	294450	5298	8.49	449.79	Kentucky
2011	Commercial	Mississippi	226136	5063	9.48	479.86	Mississippi
2011	Commercial	Tennessee	463992	5213	10.27	535.22	Tennessee
2011	Commercial	West South Central	2085706	7362	8.56	629.95	West South Central
2011	Commercial	Arkansas	180291	5614	7.5	421.11	Arkansas
2011	Commercial	Louisiana	277004	7305	8.44	616.84	Louisiana
2011	Commercial	Oklahoma	264782	6173	7.6	468.9	Oklahoma
2011	Commercial	Texas	1363629	7835	8.83	691.5	Texas
2011	Commercial	Mountain	1330487	5851	8.86	518.32	Mountain
2011	Commercial	Arizona	305340	8054	9.5	764.94	Arizona
2011	Commercial	Colorado	347903	4764	9.44	449.84	Colorado
2011	Commercial	Idaho	101424	4905	6.41	314.63	Idaho
2011	Commercial	Montana	101512	4016	9.12	366.1	Montana
2011	Commercial	Nevada	155395	4824	9.05	436.76	Nevada
2011	Commercial	New Mexico	136678	5644	9.07	512.18	New Mexico
2011	Commercial	Utah	122363	7181	7.35	528.11	Utah
2011	Commercial	Wyoming	59872	6059	7.72	467.44	Wyoming
2011	Commercial	Pacific Contiguous	2411142	5804	11.61	674.15	Pacific Contiguous
2011	Commercial	California	1818049	5628	13.05	734.21	California
2011	Commercial	Oregon	238908	5495	8.15	447.99	Oregon
2011	Commercial	Washington	354185	6919	7.49	518.4	Washington
2011	Commercial	Pacific Noncontiguous	108546	4777	24.45	1167.99	Pacific Noncontiguous
2011	Commercial	Alaska	48503	4904	15.1	740.4	Alaska
2011	Commercial	Hawaii	60043	4675	32.37	1513.39	Hawaii
2011	Commercial	U.S. Total	17638062	6275	10.23	642.2	U.S. Total
2012	Residential	New England	6203726	634.131	15.7136	99.6448	New England
2012	Residential	Connecticut	1454651	730.853	17.3433	126.754	Connecticut
2012	Residential	Maine	703770	530.563	14.6588	77.7742	Maine
2012	Residential	Massachusetts	2699141	627.158	14.9127	93.5264	Massachusetts
2012	Residential	New Hampshire	601697	614.818	16.0702	98.8022	New Hampshire
2012	Residential	Rhode Island	435448	597.348	14.4041	86.0423	Rhode Island
2012	Residential	Vermont	309019	565.036	17.0061	96.0905	Vermont
2012	Residential	Middle Atlantic	15727423	700.637	15.2727	107.006	Middle Atlantic
2012	Residential	New Jersey	3455302	691.28	15.7826	109.102	New Jersey
2012	Residential	New York	7010740	602.546	17.6158	106.143	New York
2012	Residential	Pennsylvania	5261381	837.487	12.7499	106.778	Pennsylvania
2012	Residential	East North Central	19583335	802.726	12.0493	96.723	East North Central
2012	Residential	Illinois	5098647	766.574	11.375	87.1978	Illinois
2012	Residential	Indiana	2755595	996.866	10.5265	104.935	Indiana
2012	Residential	Michigan	4250620	675.61	14.1349	95.4965	Michigan
2012	Residential	Ohio	4869305	894.853	11.7589	105.225	Ohio
2012	Residential	Wisconsin	2609168	703.492	13.1906	92.7947	Wisconsin
2012	Residential	West North Central	9096181	941.78	10.5913	99.7472	West North Central
2012	Residential	Iowa	1334596	873.399	10.8194	94.4965	Iowa
2012	Residential	Kansas	1217256	944.52	11.2426	106.188	Kansas
2012	Residential	Minnesota	2317336	793.283	11.3533	90.0636	Minnesota
2012	Residential	Missouri	2699287	1060.05	10.1694	107.801	Missouri
2012	Residential	Nebraska	806524	1000.19	10.0444	100.464	Nebraska
2012	Residential	North Dakota	342549	1091.03	9.06028	98.85	North Dakota
2012	Residential	South Dakota	378633	980.222	10.0674	98.6828	South Dakota
2012	Residential	South Atlantic	26018443	1078.58	11.3774	122.714	South Atlantic
2012	Residential	Delaware	399998	942.022	13.5798	127.925	Delaware
2012	Residential	District of Columbia	231550	720.696	12.2815	88.512	District of Columbia
2012	Residential	Florida	8645207	1080.82	11.4217	123.448	Florida
2012	Residential	Georgia	4071478	1098.29	11.1746	122.73	Georgia
2012	Residential	Maryland	2212287	1004.92	12.8366	128.998	Maryland
2012	Residential	North Carolina	4230588	1076.91	10.9064	117.453	North Carolina
2012	Residential	South Carolina	2113144	1118.64	11.7678	131.64	South Carolina
2012	Residential	Virginia	3248518	1116.78	11.0783	123.72	Virginia
2012	Residential	West Virginia	865673	1077.65	9.85013	106.15	West Virginia
2012	Residential	East South Central	8053112	1184.59	10.3204	122.255	East South Central
2012	Residential	Alabama	2150977	1186.76	11.3977	135.263	Alabama
2012	Residential	Kentucky	1924644	1129.94	9.42906	106.542	Kentucky
2012	Residential	Mississippi	1256392	1193.41	10.2636	122.487	Mississippi
2012	Residential	Tennessee	2721099	1217.45	10.1012	122.977	Tennessee
2012	Residential	West South Central	14809221	1171.33	10.2975	120.618	West South Central
2012	Residential	Arkansas	1332154	1120.32	9.29515	104.136	Arkansas
2012	Residential	Louisiana	1995661	1253.83	8.37376	104.993	Louisiana
2012	Residential	Oklahoma	1679296	1131.91	9.50602	107.599	Oklahoma
2012	Residential	Texas	9802110	1168.21	10.9799	128.269	Texas
2012	Residential	Mountain	9048794	873.711	10.9392	95.5771	Mountain
2012	Residential	Arizona	2585638	1061.08	11.2941	119.84	Arizona
2012	Residential	Colorado	2149637	706.335	11.4591	80.9396	Colorado
2012	Residential	Idaho	673368	1009.77	8.66713	87.5179	Idaho
2012	Residential	Montana	473033	841.796	10.0832	84.8804	Montana
2012	Residential	Nevada	1080583	934.89	11.8276	110.576	Nevada
2012	Residential	New Mexico	859281	655.957	11.375	74.6151	New Mexico
2012	Residential	Utah	966063	792.582	9.92936	78.6983	Utah
2012	Residential	Wyoming	261191	866.712	9.84736	85.3482	Wyoming
2012	Residential	Pacific Contiguous	17597091	684.183	12.9423	88.5493	Pacific Contiguous
2012	Residential	California	13101887	573.136	15.3385	87.9108	California
2012	Residential	Oregon	1642444	956.636	9.80485	93.7967	Oregon
2012	Residential	Washington	2852760	1037.33	8.52774	88.4606	Washington
2012	Residential	Pacific Noncontiguous	695017	587.455	28.7631	168.97	Pacific Noncontiguous
2012	Residential	Alaska	275405	653.642	17.8828	116.89	Alaska
2012	Residential	Hawaii	419612	544.014	37.3433	203.153	Hawaii
2012	Residential	U.S. Total	126832343	903.105	11.8791	107.281	U.S. Total
2012	Commercial	New England	842773	4436.17	13.6799	606.866	New England
2012	Commercial	Connecticut	150435	7188.07	14.6523	1053.22	Connecticut
2012	Commercial	Maine	89048	3793.07	11.5274	437.244	Maine
2012	Commercial	Massachusetts	389272	3794.01	13.8415	525.148	Massachusetts
2012	Commercial	New Hampshire	104978	3555.05	13.3612	474.997	New Hampshire
2012	Commercial	Rhode Island	57824	5245.61	11.8672	622.51	Rhode Island
2012	Commercial	Vermont	51216	3244.25	14.3162	464.452	Vermont
2012	Commercial	Middle Atlantic	2215961	5914.6	12.9673	766.964	Middle Atlantic
2012	Commercial	New Jersey	489943	6521.25	12.7772	833.23	New Jersey
2012	Commercial	New York	1038268	6101.34	15.0563	918.639	New York
2012	Commercial	Pennsylvania	687750	5200.51	9.43714	490.779	Pennsylvania
2012	Commercial	East North Central	2410841	6337.1	9.4561	599.243	East North Central
2012	Commercial	Illinois	590142	7174.53	7.98788	573.093	Illinois
2012	Commercial	Indiana	344453	5811.65	9.14068	531.224	Indiana
2012	Commercial	Michigan	521091	6159.24	10.9345	673.484	Michigan
2012	Commercial	Ohio	613259	6353.47	9.47184	601.791	Ohio
2012	Commercial	Wisconsin	341896	5662.74	10.5105	595.184	Wisconsin
2012	Commercial	West North Central	1375967	6028.62	8.48467	511.509	West North Central
2012	Commercial	Iowa	221154	4600.79	8.00742	368.405	Iowa
2012	Commercial	Kansas	223822	5754.46	9.2356	531.458	Kansas
2012	Commercial	Minnesota	278466	6732.06	8.84022	595.129	Minnesota
2012	Commercial	Missouri	373022	6809.86	8.1993	558.361	Missouri
2012	Commercial	Nebraska	147463	5217.63	8.38164	437.323	Nebraska
2012	Commercial	North Dakota	63160	6740.31	8.02306	540.779	North Dakota
2012	Commercial	South Dakota	68880	5512.74	8.09651	446.339	South Dakota
2012	Commercial	South Atlantic	3585554	7049.57	9.36999	660.543	South Atlantic
2012	Commercial	Delaware	51056	6925.45	10.1295	701.516	Delaware
2012	Commercial	District of Columbia	26547	27351.9	12.0225	3288.38	District of Columbia
2012	Commercial	Florida	1160572	6608.65	9.66431	638.681	Florida
2012	Commercial	Georgia	547610	6990.55	9.5784	669.583	Georgia
2012	Commercial	Maryland	246868	10163.2	10.4336	1060.38	Maryland
2012	Commercial	North Carolina	652401	5940.89	8.66443	514.745	North Carolina
2012	Commercial	South Carolina	342761	5166.56	9.62788	497.43	South Carolina
2012	Commercial	Virginia	419052	9298.1	8.07988	751.275	Virginia
2012	Commercial	West Virginia	138687	4664.47	8.42124	392.807	West Virginia
2012	Commercial	East South Central	1349503	5081.49	9.87244	501.668	East South Central
2012	Commercial	Alabama	357395	5082.89	10.6341	540.519	Alabama
2012	Commercial	Kentucky	298211	5241.23	8.72913	457.514	Kentucky
2012	Commercial	Mississippi	227384	4978.6	9.32655	464.331	Mississippi
2012	Commercial	Tennessee	466513	5028.47	10.3078	518.326	Tennessee
2012	Commercial	West South Central	2084605	7571.89	7.98857	604.886	West South Central
2012	Commercial	Arkansas	181823	5546.62	7.71413	427.874	Arkansas
2012	Commercial	Louisiana	279613	7225.68	7.75367	560.255	Louisiana
2012	Commercial	Oklahoma	268014	6206.5	7.31979	454.303	Oklahoma
2012	Commercial	Texas	1355155	8185.1	8.1566	667.626	Texas
2012	Commercial	Mountain	1326339	5913.11	8.9937	531.808	Mountain
2012	Commercial	Arizona	305250	8105.99	9.52959	772.468	Arizona
2012	Commercial	Colorado	348752	4778.28	9.39312	448.83	Colorado
2012	Commercial	Idaho	102319	4868.86	6.86384	334.19	Idaho
2012	Commercial	Montana	101530	4036.17	9.12833	368.435	Montana
2012	Commercial	Nevada	155927	4978.08	8.8299	439.56	Nevada
2012	Commercial	New Mexico	137413	5558.39	9.32456	518.295	New Mexico
2012	Commercial	Utah	115880	7768.67	8.05548	625.804	Utah
2012	Commercial	Wyoming	59268	5969.28	8.23998	491.868	Wyoming
2012	Commercial	Pacific Contiguous	2428587	5724.69	11.9189	682.323	Pacific Contiguous
2012	Commercial	California	1834779	5531.62	13.4058	741.559	California
2012	Commercial	Oregon	237780	5538.67	8.31136	460.339	Oregon
2012	Commercial	Washington	356028	6843.94	7.67554	525.309	Washington
2012	Commercial	Pacific Noncontiguous	108899	4678.05	25.4972	1192.77	Pacific Noncontiguous
2012	Commercial	Alaska	48790	4910.57	14.9268	732.992	Alaska
2012	Commercial	Hawaii	60109	4489.32	34.8821	1565.97	Hawaii
2012	Commercial	U.S. Total	17729029	6237.89	10.0895	629.375	U.S. Total
2012	Industrial	New England	34164	67854	11.8349	8030.44	New England
2012	Industrial	Connecticut	4647	63947.1	12.6729	8103.97	Connecticut
2012	Industrial	Maine	2780	90741.5	7.98195	7242.94	Maine
2012	Industrial	Massachusetts	21145	66710.8	12.5666	8383.31	Massachusetts
2012	Industrial	New Hampshire	3444	47247.2	11.8323	5590.42	New Hampshire
2012	Industrial	Rhode Island	1927	39935.9	10.6767	4263.85	Rhode Island
2012	Industrial	Vermont	221	536044	9.97968	53495.5	Vermont
2012	Industrial	Middle Atlantic	45836	126368	7.49035	9465.42	Middle Atlantic
2012	Industrial	New Jersey	12729	50817.9	10.5165	5344.27	New Jersey
2012	Industrial	New York	8144	140240	6.69594	9390.35	New York
2012	Industrial	Pennsylvania	24963	160367	7.22802	11591.3	Pennsylvania
2012	Industrial	East North Central	61815	272616	6.50978	17746.7	East North Central
2012	Industrial	Illinois	6042	624482	5.79778	36206.1	Illinois
2012	Industrial	Indiana	18525	216678	6.33844	13734	Indiana
2012	Industrial	Michigan	13074	202921	7.62392	15470.5	Michigan
2012	Industrial	Ohio	19602	226930	6.23521	14149.5	Ohio
2012	Industrial	Wisconsin	4572	429442	7.34492	31542.2	Wisconsin
2012	Industrial	West North Central	113836	66854.5	6.27736	4196.7	West North Central
2012	Industrial	Iowa	7255	224118	5.29526	11867.6	Iowa
2012	Industrial	Kansas	25017	36778.7	7.08909	2607.27	Kansas
2012	Industrial	Minnesota	11010	177231	6.53658	11584.9	Minnesota
2012	Industrial	Missouri	8901	164723	5.89262	9706.52	Missouri
2012	Industrial	Nebraska	54160	18332.9	7.00695	1284.58	Nebraska
2012	Industrial	North Dakota	4602	92778.2	6.55199	6078.82	North Dakota
2012	Industrial	South Dakota	2891	78515.8	6.57078	5159.1	South Dakota
2012	Industrial	South Atlantic	75781	153242	6.5507	10038.5	South Atlantic
2012	Industrial	Delaware	854	268796	8.35743	22464.4	Delaware
2012	Industrial	District of Columbia	1	18198000	5.45788	993225	District of Columbia
2012	Industrial	Florida	17414	78603.3	8.03544	6316.12	Florida
2012	Industrial	Georgia	17335	150104	5.97732	8972.18	Georgia
2012	Industrial	Maryland	8941	41940	8.09086	3393.31	Maryland
2012	Industrial	North Carolina	10399	215535	6.42279	13843.3	North Carolina
2012	Industrial	South Carolina	4392	534380	6.02056	32172.7	South Carolina
2012	Industrial	Virginia	3973	363196	6.71512	24389	Virginia
2012	Industrial	West Virginia	12472	79214.6	6.32899	5013.48	West Virginia
2012	Industrial	East South Central	23384	439165	6.11008	26833.3	East South Central
2012	Industrial	Alabama	7168	392382	6.22479	24424.9	Alabama
2012	Industrial	Kentucky	7134	516259	5.35026	27621.2	Kentucky
2012	Industrial	Mississippi	7125	196612	6.23929	12267.2	Mississippi
2012	Industrial	Tennessee	1957	1.21257e+06	7.07711	85814.8	Tennessee
2012	Industrial	West South Central	162688	81128.6	5.38501	4368.78	West South Central
2012	Industrial	Arkansas	33926	41383.6	5.76496	2385.75	Arkansas
2012	Industrial	Louisiana	18143	139856	4.75874	6655.37	Louisiana
2012	Industrial	Oklahoma	18242	75694.4	5.08687	3850.48	Oklahoma
2012	Industrial	Texas	92377	85264.1	5.5713	4750.32	Texas
2012	Industrial	Mountain	88114	77827.7	6.17615	4806.75	Mountain
2012	Industrial	Arizona	7740	134024	6.53186	8754.24	Arizona
2012	Industrial	Colorado	16017	80202.5	6.94648	5571.25	Colorado
2012	Industrial	Idaho	26523	30082	5.4783	1647.98	Idaho
2012	Industrial	Montana	7268	47783.8	5.10424	2439	Montana
2012	Industrial	Nevada	3748	305373	6.48386	19800	Nevada
2012	Industrial	New Mexico	8238	73331.1	5.83062	4275.66	New Mexico
2012	Industrial	Utah	9417	85786.3	5.62043	4821.55	Utah
2012	Industrial	Wyoming	9163	91030.7	6.02745	5486.83	Wyoming
2012	Industrial	Pacific Contiguous	124798	57784.2	7.78297	4497.32	Pacific Contiguous
2012	Industrial	California	73805	53013.2	10.4905	5561.37	California
2012	Industrial	Oregon	23303	42932.9	5.58674	2398.55	Oregon
2012	Industrial	Washington	27690	82999	4.12954	3427.47	Washington
2012	Industrial	Pacific Noncontiguous	1969	213427	26.9866	57596.7	Pacific Noncontiguous
2012	Industrial	Alaska	1263	91130.7	16.8208	15328.9	Alaska
2012	Industrial	Hawaii	706	432210	30.8211	133212	Hawaii
2012	Industrial	U.S. Total	732385	112158	6.67143	7482.55	U.S. Total
2013	Industrial	New England	29631	77261	12.2486	9463.42	New England
2013	Industrial	Connecticut	4568	63670.1	12.6066	8026.61	Connecticut
2013	Industrial	Maine	2962	89386.1	8.34089	7455.59	Maine
2013	Industrial	Massachusetts	16594	82677.2	13.1762	10893.7	Massachusetts
2013	Industrial	New Hampshire	3371	48762.5	11.3985	5558.17	New Hampshire
2013	Industrial	Rhode Island	1913	40203.5	11.822	4752.84	Rhode Island
2013	Industrial	Vermont	223	540275	10.8421	58577.4	Vermont
2013	Industrial	Middle Atlantic	44930	136360	7.26919	9912.26	Middle Atlantic
2013	Industrial	New Jersey	12369	50972.3	10.7976	5503.77	New Jersey
2013	Industrial	New York	7960	187510	6.58474	12347	New York
2013	Industrial	Pennsylvania	24601	162741	6.96872	11341	Pennsylvania
2013	Industrial	East North Central	62164	265792	6.64846	17671.1	East North Central
2013	Industrial	Illinois	6498	569236	5.9428	33828.6	Illinois
2013	Industrial	Indiana	18162	219357	6.69666	14689.6	Indiana
2013	Industrial	Michigan	13419	194510	7.71572	15007.8	Michigan
2013	Industrial	Ohio	19360	221191	6.22031	13758.7	Ohio
2013	Industrial	Wisconsin	4725	412165	7.4012	30505.1	Wisconsin
2013	Industrial	West North Central	123047	61102.4	6.66817	4074.41	West North Central
2013	Industrial	Iowa	8413	194566	5.6243	10943	Iowa
2013	Industrial	Kansas	26394	34759.7	7.39283	2569.72	Kansas
2013	Industrial	Minnesota	11383	166434	6.982	11620.4	Minnesota
2013	Industrial	Missouri	10274	142360	6.2941	8960.29	Missouri
2013	Industrial	Nebraska	56365	16634.7	7.4425	1238.04	Nebraska
2013	Industrial	North Dakota	6683	66200	7.12639	4717.67	North Dakota
2013	Industrial	South Dakota	3535	64210.4	6.9662	4473.02	South Dakota
2013	Industrial	South Atlantic	77137	150530	6.54534	9852.69	South Atlantic
2013	Industrial	Delaware	848	257473	8.43369	21714.5	Delaware
2013	Industrial	District of Columbia	1	18948750	5.53691	1049175	District of Columbia
2013	Industrial	Florida	17865	76450.8	7.60719	5815.76	Florida
2013	Industrial	Georgia	18981	138048	6.27302	8659.77	Georgia
2013	Industrial	Maryland	8788	37398.9	8.36437	3128.19	Maryland
2013	Industrial	North Carolina	10276	217922	6.44874	14053.2	North Carolina
2013	Industrial	South Carolina	4479	533404	6.00955	32055.2	South Carolina
2013	Industrial	Virginia	3585	398661	6.62515	26411.9	Virginia
2013	Industrial	West Virginia	12314	81347.3	6.20052	5043.96	West Virginia
2013	Industrial	East South Central	22570	404059	5.98015	24163.3	East South Central
2013	Industrial	Alabama	7029	401553	5.94766	23883	Alabama
2013	Industrial	Kentucky	7185	428805	5.66476	24290.8	Kentucky
2013	Industrial	Mississippi	7165	187622	6.33884	11893.1	Mississippi
2013	Industrial	Tennessee	1191	1.57163e+06	6.29063	98865.3	Tennessee
2013	Industrial	West South Central	168070	82432.3	5.81809	4795.98	West South Central
2013	Industrial	Arkansas	34699	39783.5	6.0358	2401.25	Arkansas
2013	Industrial	Louisiana	19019	135099	5.92031	7998.3	Louisiana
2013	Industrial	Oklahoma	18471	76182.8	5.49155	4183.62	Oklahoma
2013	Industrial	Texas	95881	88623.6	5.80588	5145.38	Texas
2013	Industrial	Mountain	91556	74666.6	6.47723	4836.33	Mountain
2013	Industrial	Arizona	7624	136910	6.6564	9113.26	Arizona
2013	Industrial	Colorado	16172	76020.6	7.34091	5580.6	Colorado
2013	Industrial	Idaho	26846	28936.6	6.09859	1764.72	Idaho
2013	Industrial	Montana	8692	40545.5	5.42721	2200.49	Montana
2013	Industrial	Nevada	3783	303079	6.51564	19747.5	Nevada
2013	Industrial	New Mexico	8676	69910.1	6.35568	4443.26	New Mexico
2013	Industrial	Utah	9629	86634.2	5.87014	5085.55	Utah
2013	Industrial	Wyoming	10134	83523.9	6.41992	5362.17	Wyoming
2013	Industrial	Pacific Contiguous	122756	58954	8.12524	4790.15	Pacific Contiguous
2013	Industrial	California	71556	55200.6	10.962	6051.09	California
2013	Industrial	Oregon	23392	43496.3	5.7985	2522.14	Oregon
2013	Industrial	Washington	27808	81615.1	4.23124	3453.33	Washington
2013	Industrial	Pacific Noncontiguous	2008	205974	26.0792	53716.5	Pacific Noncontiguous
2013	Industrial	Alaska	1314	84985.2	15.8322	13455	Alaska
2013	Industrial	Hawaii	694	435052	29.8692	129946	Hawaii
2013	Industrial	U.S. Total	743869	109602	6.83893	7495.58	U.S. Total
2013	Residential	New England	6221890	647.848	16.2209	105.087	New England
2013	Residential	Connecticut	1454963	752.336	17.5542	132.066	Connecticut
2013	Residential	Maine	704775	551.276	14.354	79.1301	Maine
2013	Residential	Massachusetts	2708759	637.673	15.8343	100.971	Massachusetts
2013	Residential	New Hampshire	603628	628.681	16.3287	102.655	New Hampshire
2013	Residential	Rhode Island	438198	601.838	15.1994	91.4757	Rhode Island
2013	Residential	Vermont	311567	568.669	17.1374	97.4548	Vermont
2013	Residential	Middle Atlantic	15761832	706.209	15.7004	110.877	Middle Atlantic
2013	Residential	New Jersey	3461109	687.271	15.7287	108.099	New Jersey
2013	Residential	New York	7027866	602.096	18.7948	113.163	New York
2013	Residential	Pennsylvania	5272857	857.408	12.7892	109.656	Pennsylvania
2013	Residential	East North Central	19652153	797.394	12.1354	96.767	East North Central
2013	Residential	Illinois	5120607	754.667	10.6263	80.1933	Illinois
2013	Residential	Indiana	2771260	1004.56	10.994	110.441	Indiana
2013	Residential	Michigan	4265264	664.538	14.5896	96.9531	Michigan
2013	Residential	Ohio	4875346	891.528	12.0102	107.074	Ohio
2013	Residential	Wisconsin	2619676	702.883	13.5459	95.2121	Wisconsin
2013	Residential	West North Central	9145587	968.968	10.9427	106.032	West North Central
2013	Residential	Iowa	1343500	909.038	11.0453	100.406	Iowa
2013	Residential	Kansas	1222985	926.218	11.6443	107.851	Kansas
2013	Residential	Minnesota	2329734	817.316	11.8081	96.5097	Minnesota
2013	Residential	Missouri	2708934	1086.47	10.6036	115.205	Missouri
2013	Residential	Nebraska	810867	1034.09	10.3137	106.654	Nebraska
2013	Residential	North Dakota	348486	1204.94	9.11638	109.847	North Dakota
2013	Residential	South Dakota	381081	1054.93	10.2579	108.213	South Dakota
2013	Residential	South Atlantic	26256056	1088.49	11.3856	123.931	South Atlantic
2013	Residential	Delaware	403519	943.783	12.9533	122.251	Delaware
2013	Residential	District of Columbia	235322	720.154	12.5675	90.5054	District of Columbia
2013	Residential	Florida	8756322	1078.21	11.2717	121.532	Florida
2013	Residential	Georgia	4101351	1087.94	11.4592	124.669	Georgia
2013	Residential	Maryland	2218948	1030.83	13.2543	136.63	Maryland
2013	Residential	North Carolina	4268019	1098.31	10.9731	120.518	North Carolina
2013	Residential	South Carolina	2135432	1124.38	11.9938	134.856	South Carolina
2013	Residential	Virginia	3273502	1156.16	10.8431	125.363	Virginia
2013	Residential	West Virginia	863641	1117.54	9.52443	106.439	West Virginia
2013	Residential	East South Central	8093582	1210.17	10.404	125.905	East South Central
2013	Residential	Alabama	2158898	1211.21	11.2579	136.358	Alabama
2013	Residential	Kentucky	1935245	1153.52	9.79181	112.95	Kentucky
2013	Residential	Mississippi	1260892	1220.2	10.7764	131.493	Mississippi
2013	Residential	Tennessee	2738547	1244.76	9.98165	124.247	Tennessee
2013	Residential	West South Central	14998178	1180.15	10.7403	126.752	West South Central
2013	Residential	Arkansas	1339680	1133.31	9.58594	108.638	Arkansas
2013	Residential	Louisiana	2011044	1272.52	9.42871	119.983	Louisiana
2013	Residential	Oklahoma	1693151	1141.85	9.67427	110.466	Oklahoma
2013	Residential	Texas	9954303	1174.3	11.3537	133.327	Texas
2013	Residential	Mountain	9162929	876.32	11.3146	99.152	Mountain
2013	Residential	Arizona	2630595	1048.67	11.7147	122.849	Arizona
2013	Residential	Colorado	2169365	711.764	11.929	84.9064	Colorado
2013	Residential	Idaho	680930	1054.84	9.32405	98.3538	Idaho
2013	Residential	Montana	477266	860.19	10.3294	88.8521	Montana
2013	Residential	Nevada	1094770	924.276	11.8948	109.941	Nevada
2013	Residential	New Mexico	865195	655.342	11.6831	76.5642	New Mexico
2013	Residential	Utah	981194	798.496	10.3685	82.7922	Utah
2013	Residential	Wyoming	263614	894.457	10.1566	90.8462	Wyoming
2013	Residential	Pacific Contiguous	17890314	673.693	13.4837	90.8385	Pacific Contiguous
2013	Residential	California	13359503	557.15	16.1881	90.1921	California
2013	Residential	Oregon	1650803	975.715	9.89798	96.5761	Oregon
2013	Residential	Washington	2880008	1041.19	8.69666	90.5484	Washington
2013	Residential	Pacific Noncontiguous	699661	561.322	28.5617	160.323	Pacific Noncontiguous
2013	Residential	Alaska	277275	632.334	18.1172	114.562	Alaska
2013	Residential	Hawaii	422386	514.706	36.9849	190.363	Hawaii
2013	Residential	U.S. Total	127882182	908.987	12.1235	110.201	U.S. Total
2013	Commercial	New England	847177	4420.43	13.9673	617.416	New England
2013	Commercial	Connecticut	150419	7207.15	14.6338	1054.68	Connecticut
2013	Commercial	Maine	89336	3745.79	11.7407	439.783	Maine
2013	Commercial	Massachusetts	391856	3766.92	14.2348	536.215	Massachusetts
2013	Commercial	New Hampshire	105461	3569.14	13.5208	482.578	New Hampshire
2013	Commercial	Rhode Island	58317	5240.17	12.9175	676.902	Rhode Island
2013	Commercial	Vermont	51788	3245.37	14.6613	475.814	Vermont
2013	Commercial	Middle Atlantic	2211858	5942.15	13.0589	775.979	Middle Atlantic
2013	Commercial	New Jersey	482105	6608.36	12.7743	844.169	New Jersey
2013	Commercial	New York	1040398	6114.83	15.3541	938.876	New York
2013	Commercial	Pennsylvania	689355	5215.63	9.24992	482.441	Pennsylvania
2013	Commercial	East North Central	2419553	6295.88	9.58398	603.396	East North Central
2013	Commercial	Illinois	596672	7049.2	8.14456	574.126	Illinois
2013	Commercial	Indiana	346933	5825.33	9.60023	559.245	Indiana
2013	Commercial	Michigan	520327	6037.47	11.0638	667.975	Michigan
2013	Commercial	Ohio	613964	6341.02	9.34862	592.798	Ohio
2013	Commercial	Wisconsin	341657	5770.5	10.745	620.038	Wisconsin
2013	Commercial	West North Central	1384548	6078.68	8.9764	545.646	West North Central
2013	Commercial	Iowa	222239	4671.82	8.43954	394.28	Iowa
2013	Commercial	Kansas	224515	5658.5	9.67886	547.679	Kansas
2013	Commercial	Minnesota	281187	6828.55	9.4213	643.338	Minnesota
2013	Commercial	Missouri	371712	6841.15	8.80432	602.317	Missouri
2013	Commercial	Nebraska	148648	5262.47	8.60182	452.668	Nebraska
2013	Commercial	North Dakota	66801	7092.14	8.38873	594.941	North Dakota
2013	Commercial	South Dakota	69446	5594.09	8.51247	476.195	South Dakota
2013	Commercial	South Atlantic	3618617	6987.8	9.37635	655.201	South Atlantic
2013	Commercial	Delaware	51673	6705.3	10.1956	683.644	Delaware
2013	Commercial	District of Columbia	26530	26696.6	11.9413	3187.93	District of Columbia
2013	Commercial	Florida	1175896	6530.1	9.39111	613.249	Florida
2013	Commercial	Georgia	554350	6817.77	9.98657	680.861	Georgia
2013	Commercial	Maryland	247168	10103.2	10.6843	1079.46	Maryland
2013	Commercial	North Carolina	654747	5937.25	8.75733	519.945	North Carolina
2013	Commercial	South Carolina	346026	5086.37	9.8772	502.391	South Carolina
2013	Commercial	Virginia	422713	9413.52	8.00025	753.105	Virginia
2013	Commercial	West Virginia	139514	4655.16	8.16665	380.17	West Virginia
2013	Commercial	East South Central	1353710	5624.66	9.81119	551.846	East South Central
2013	Commercial	Alabama	358712	5251.02	10.5144	552.112	Alabama
2013	Commercial	Kentucky	297108	5891.29	8.56021	504.307	Kentucky
2013	Commercial	Mississippi	228508	5174.08	10.101	522.634	Mississippi
2013	Commercial	Tennessee	469382	5960.78	9.99792	595.954	Tennessee
2013	Commercial	West South Central	2103299	7627.35	8.11244	618.764	West South Central
2013	Commercial	Arkansas	182941	5419.76	8.0461	436.079	Arkansas
2013	Commercial	Louisiana	281835	7171.44	8.96332	642.799	Louisiana
2013	Commercial	Oklahoma	271698	6086.15	7.76692	472.706	Oklahoma
2013	Commercial	Texas	1366825	8323.18	8.01727	667.292	Texas
2013	Commercial	Mountain	1343707	5869.1	9.34559	548.502	Mountain
2013	Commercial	Arizona	308857	8104.89	9.84712	798.098	Arizona
2013	Commercial	Colorado	358800	4667.93	9.86176	460.339	Colorado
2013	Commercial	Idaho	103400	5037.31	7.3662	371.059	Idaho
2013	Commercial	Montana	101216	4025.75	9.53565	383.881	Montana
2013	Commercial	Nevada	158355	4895.09	9.01453	441.269	Nevada
2013	Commercial	New Mexico	138801	5392.95	9.74076	525.314	New Mexico
2013	Commercial	Utah	116263	7889.99	8.31782	656.275	Utah
2013	Commercial	Wyoming	58015	5841.65	8.57005	500.632	Wyoming
2013	Commercial	Pacific Contiguous	2390064	5917.21	12.5715	743.883	Pacific Contiguous
2013	Commercial	California	1794018	5758.54	14.2228	819.023	California
2013	Commercial	Oregon	235191	5697.62	8.68029	494.57	Oregon
2013	Commercial	Washington	360855	6849.17	7.7792	532.81	Washington
2013	Commercial	Pacific Noncontiguous	109649	4632.51	25.4941	1181.02	Pacific Noncontiguous
2013	Commercial	Alaska	49182	4785.29	15.5799	745.543	Alaska
2013	Commercial	Hawaii	60467	4508.24	34.0536	1535.22	Hawaii
2013	Commercial	U.S. Total	17782182	6299.41	10.283	647.766	U.S. Total
2013	Industrial	New England	29631	77261	12.2486	9463.42	New England
2013	Industrial	Connecticut	4568	63670.1	12.6066	8026.61	Connecticut
2013	Industrial	Maine	2962	89386.1	8.34089	7455.59	Maine
2013	Industrial	Massachusetts	16594	82677.2	13.1762	10893.7	Massachusetts
2013	Industrial	New Hampshire	3371	48762.5	11.3985	5558.17	New Hampshire
2013	Industrial	Rhode Island	1913	40203.5	11.822	4752.84	Rhode Island
2013	Industrial	Vermont	223	540275	10.8421	58577.4	Vermont
2013	Industrial	Middle Atlantic	44930	136360	7.26919	9912.26	Middle Atlantic
2013	Industrial	New Jersey	12369	50972.3	10.7976	5503.77	New Jersey
2013	Industrial	New York	7960	187510	6.58474	12347	New York
2013	Industrial	Pennsylvania	24601	162741	6.96872	11341	Pennsylvania
2013	Industrial	East North Central	62164	265792	6.64846	17671.1	East North Central
2013	Industrial	Illinois	6498	569236	5.9428	33828.6	Illinois
2013	Industrial	Indiana	18162	219357	6.69666	14689.6	Indiana
2013	Industrial	Michigan	13419	194510	7.71572	15007.8	Michigan
2013	Industrial	Ohio	19360	221191	6.22031	13758.7	Ohio
2013	Industrial	Wisconsin	4725	412165	7.4012	30505.1	Wisconsin
2013	Industrial	West North Central	123047	61102.4	6.66817	4074.41	West North Central
2013	Industrial	Iowa	8413	194566	5.6243	10943	Iowa
2013	Industrial	Kansas	26394	34759.7	7.39283	2569.72	Kansas
2013	Industrial	Minnesota	11383	166434	6.982	11620.4	Minnesota
2013	Industrial	Missouri	10274	142360	6.2941	8960.29	Missouri
2013	Industrial	Nebraska	56365	16634.7	7.4425	1238.04	Nebraska
2013	Industrial	North Dakota	6683	66200	7.12639	4717.67	North Dakota
2013	Industrial	South Dakota	3535	64210.4	6.9662	4473.02	South Dakota
2013	Industrial	South Atlantic	77137	150530	6.54534	9852.69	South Atlantic
2013	Industrial	Delaware	848	257473	8.43369	21714.5	Delaware
2013	Industrial	District of Columbia	1	18948750	5.53691	1049175	District of Columbia
2013	Industrial	Florida	17865	76450.8	7.60719	5815.76	Florida
2013	Industrial	Georgia	18981	138048	6.27302	8659.77	Georgia
2013	Industrial	Maryland	8788	37398.9	8.36437	3128.19	Maryland
2013	Industrial	North Carolina	10276	217922	6.44874	14053.2	North Carolina
2013	Industrial	South Carolina	4479	533404	6.00955	32055.2	South Carolina
2013	Industrial	Virginia	3585	398661	6.62515	26411.9	Virginia
2013	Industrial	West Virginia	12314	81347.3	6.20052	5043.96	West Virginia
2013	Industrial	East South Central	22570	404059	5.98015	24163.3	East South Central
2013	Industrial	Alabama	7029	401553	5.94766	23883	Alabama
2013	Industrial	Kentucky	7185	428805	5.66476	24290.8	Kentucky
2013	Industrial	Mississippi	7165	187622	6.33884	11893.1	Mississippi
2013	Industrial	Tennessee	1191	1.57163e+06	6.29063	98865.3	Tennessee
2013	Industrial	West South Central	168070	82432.3	5.81809	4795.98	West South Central
2013	Industrial	Arkansas	34699	39783.5	6.0358	2401.25	Arkansas
2013	Industrial	Louisiana	19019	135099	5.92031	7998.3	Louisiana
2013	Industrial	Oklahoma	18471	76182.8	5.49155	4183.62	Oklahoma
2013	Industrial	Texas	95881	88623.6	5.80588	5145.38	Texas
2013	Industrial	Mountain	91556	74666.6	6.47723	4836.33	Mountain
2013	Industrial	Arizona	7624	136910	6.6564	9113.26	Arizona
2013	Industrial	Colorado	16172	76020.6	7.34091	5580.6	Colorado
2013	Industrial	Idaho	26846	28936.6	6.09859	1764.72	Idaho
2013	Industrial	Montana	8692	40545.5	5.42721	2200.49	Montana
2013	Industrial	Nevada	3783	303079	6.51564	19747.5	Nevada
2013	Industrial	New Mexico	8676	69910.1	6.35568	4443.26	New Mexico
2013	Industrial	Utah	9629	86634.2	5.87014	5085.55	Utah
2013	Industrial	Wyoming	10134	83523.9	6.41992	5362.17	Wyoming
2013	Industrial	Pacific Contiguous	122756	58954	8.12524	4790.15	Pacific Contiguous
2013	Industrial	California	71556	55200.6	10.962	6051.09	California
2013	Industrial	Oregon	23392	43496.3	5.7985	2522.14	Oregon
2013	Industrial	Washington	27808	81615.1	4.23124	3453.33	Washington
2013	Industrial	Pacific Noncontiguous	2008	205974	26.0792	53716.5	Pacific Noncontiguous
2013	Industrial	Alaska	1314	84985.2	15.8322	13455	Alaska
2013	Industrial	Hawaii	694	435052	29.8692	129946	Hawaii
2013	Industrial	U.S. Total	743869	109602	6.83893	7495.58	U.S. Total
2014	Industrial	New England	28017	56832.9	11.8423	6730.3	New England
2014	Industrial	Connecticut	4648	63016.3	12.9156	8138.94	Connecticut
2014	Industrial	Maine	3023	92553.9	8.94751	8281.27	Maine
2014	Industrial	Massachusetts	14896	44536.2	12.7405	5674.13	Massachusetts
2014	Industrial	New Hampshire	3342	49098.9	11.9295	5857.27	New Hampshire
2014	Industrial	Rhode Island	1884	39240.5	12.8626	5047.36	Rhode Island
2014	Industrial	Vermont	224	527528	10.2335	53984.7	Vermont
2014	Industrial	Middle Atlantic	44397	138593	7.61268	10550.6	Middle Atlantic
2014	Industrial	New Jersey	12313	50871.8	11.3849	5791.69	New Jersey
2014	Industrial	New York	7862	190823	6.57811	12552.5	New York
2014	Industrial	Pennsylvania	24222	166232	7.41134	12320	Pennsylvania
2014	Industrial	East North Central	62167	268772	7.07182	19007.1	East North Central
2014	Industrial	Illinois	6098	605795	6.85149	41506	Illinois
2014	Industrial	Indiana	18106	225931	6.96597	15738.3	Indiana
2014	Industrial	Michigan	13289	203464	7.67774	15621.4	Michigan
2014	Industrial	Ohio	19209	220510	6.76956	14927.5	Ohio
2014	Industrial	Wisconsin	5465	363092	7.51982	27303.8	Wisconsin
2014	Industrial	West North Central	124203	62738.2	6.73173	4223.37	West North Central
2014	Industrial	Iowa	7399	230168	5.71	13142.6	Iowa
[truncated: 1,283 more rows]

## Sheet: Indust and Supplier Price
	Entity	Supply	State	Ownership	Consumers	Revenue	Sales	Retail Price	Year
[truncated: 106,497 more rows]

[truncated: 13 more sheets: Cost of Product, Cost Info Matrix, Rough->, Cost of Product Data Matrix, Raw->, Raw Materials for Energy Produc, Consumption Matrix (Prod), IOUConsolidation, Cost of Prod Elec (00-22), Real GDP by Year (1998 - 22), Consumption n Rates (Ind, 00-22, Population by State (00-20), Unemp by State (00-22)]
