# Supplementary material for: Retroactive merger review of Duke and Progress Energy in North and South Carolina
Source: Research Square preprint supplement (doi:10.21203/rs.3.rs-4676204/v1), 2024-07-24
Supplement: Supplementary file 2 [file adb8695c9a4bcb3f1cf62575.xlsx]

## Sheet: Sheet2
		Residential						Industrial						Commercial
	Year	NC	Synethic NC	Percent Diff	SC	Synthetic SC	Percent Diff	NC	Synethic NC	Percent Diff	SC	Synthetic SC	Percent Diff	NC	Synethic NC	Percent Diff	SC	Synthetic SC	Percent Diff
	2006	9.11648	9.03554	0.00887786	9.02709	8.93677	0.0100052	5.23082	5.40361	-0.0330344	4.71347	4.62566	0.0186294	7.16679	7.16453	0.000315246	7.60463	7.7422	-0.0180899
	2007	9.39655	9.01459	0.0406492	9.18662	9.18851	-0.00020579	5.46502	5.28704	0.0325682	4.82904	4.86809	-0.00808694	7.42892	7.24752	0.0244186	7.74444	7.95063	-0.0266237
	2008	9.51654	9.8715	-0.0372996	9.88652	9.98548	-0.0100097	5.53523	5.9736	-0.0791959	5.36698	5.50287	-0.02532	7.55181	7.73479	-0.0242296	8.42323	8.96175	-0.0639328
	2009	9.99	10.0332	-0.00432531	10.44	10.366	0.00709291	5.99	6.19155	-0.0336477	5.79	5.68858	0.0175164	7.98	7.85096	0.0161704	8.74	9.00875	-0.0307494
	2010	10.12	9.89556	0.0221779	10.5	10.673	-0.016481	6.17	6.08831	0.0132399	5.74	5.7405	-8.7108e-05	8.16	8.02076	0.0170637	8.9	9.35453	-0.0510708
	2011	10.26	10.5263	-0.0259591	11.05	11.2005	-0.013619	6.01	6.35498	-0.057401	5.94	6.1324	-0.0323906	8.13	8.37765	-0.0304613	9.3	9.79898	-0.0536538
	2012	10.9064	10.7155	0.0175093	11.7678	11.4251	0.0291228	6.42279	6.30913	0.0176967	6.02056	6.08294	-0.0103619	8.66443	8.68146	-0.00196469	9.62788	9.84474	-0.0225236
	2013	10.9731	11.1227	-0.0136401	11.9938	11.5309	0.0385922	6.44874	6.5264	-0.0120433	6.00955	6.05028	-0.00677661	8.75733	9.15122	-0.044978	9.8772	9.92782	-0.00512493
	2014	11.1021	11.4989	-0.0357393	12.4505	11.7581	0.0556114	6.49679	6.78995	-0.045124	6.29086	6.13431	0.0248856	8.75139	9.57569	-0.0941909	10.2771	10.2473	0.00290538
	2015	11.281	11.4617	-0.016021	12.57	12.0169	0.0440008	6.5128	6.71069	-0.0303853	6.04606	5.95937	0.0143379	8.72886	9.48999	-0.0871959	10.2143	10.1169	0.00953815
	2016	11.0271	11.205	-0.0161323	12.6531	12.1134	0.0426558	6.31194	6.41307	-0.0160228	6.0908	5.87833	0.0348843	8.61961	9.5606	-0.109169	10.2759	10.1345	0.0137605
	2017	10.9353	11.7031	-0.0702127	13.0172	12.4268	0.045352	6.2035	6.80347	-0.0967156	6.18672	5.97878	0.0336095	8.44201	9.89075	-0.17161	10.5748	10.4782	0.00914083
	2018	11.09	11.5304	-0.0397123	12.44	12.2417	0.0159397	6.33	6.72054	-0.0616967	6.1	5.91728	0.0299541	8.57787	9.91288	-0.155634	10.1091	10.3774	-0.0265438
	2019	11.42	11.7771	-0.0312671	12.99	12.3932	0.0459415	6.30338	6.64288	-0.0538604	6.11321	5.87054	0.0396965	8.81	10.0621	-0.142124	10.58	10.5989	-0.00178355
		North Carolina			South Carolina
	State	Residential Weight	Indus Weight	Commerical Weight	Residential Weight	Indus Weight	Commerical Weight
	AK	0	0	0	0	0	0
	AL	0	0	0	0.078	0	0.214
	AZ	0	0	0	0	0	0
	CO	0	0	0	0	0	0.253
	GA	0.421	0	0	0	0.059	0.095
	HI	0	0	0	0	0	0
	IN	0.221	0.527	0.399	0	0	0
	KY	0	0	0	0	0.488	0
	LA	0	0	0	0	0	0
	MS	0.359	0.452	0.163	0	0.034	0
	MT	0	0	0	0	0	0
	ND	0	0	0.438	0.005	0.02	0
	NM	0	0	0	0	0	0.027
	NV	0	0	0	0	0	0
	SD	0	0	0	0.113	0.08	0.093
	TN	0	0.021	0	0.401	0.318	0.318
	WI	0	0	0	0.402	0	0
